# Supplementary material
Source: publisher figshare collection journal article supplement (https://diabetesjournals.figshare.com/ndownloader/files/22624850)
Supplement: Supplementary file 1 [file 22624850]

## Sheet: TableS1_comorbidity
Table S1. Prevelence of comorbidity conditions in patients infected with SARS-CoV-2 from three recent studies.
Comorbidity Study	Huang et al., 2020 (41 cases)	Guan et al., 2020 (1,099 cases)	NCPERET, 2020 (44,672 cases) a	Overall
Any comorbidity	13 (32%)	255 (23.2%)	5,276 (25.2%)	5,544 (25.1%)
Hypertension	6 (15%)	164 (14.9%)	2,683 (12.8%)	2,853 (12.9%)
Diabetes	8 (20%)	81 (7.4%)	1,102 (5.3%)	1,191 (5.4%)
Cardiovascular diseases	6 (15%)	27 (2.5%)	873 (4.2%)	906 (4.1%)
Respiratory system diseases	0 (0%)	12 (1.1%)	511 (2.4%)	523 (2.4%)
Any malignancy	1 (2%)	10 (0.9%)	107 (0.5%)	118 (0.5%)
Others	2 (4%)	48 (4.6%)	NA	NA
a NCPERET: Novel Coronavirus Pneumonia Emergency Response Epidemiology Team; Only 20,982 patients have relevant information. NA: not available.

## Sheet: Table S2a_selTraits
	Table S2a	Sources and details of GTEx and traits listed in Table 1 (with nominally significant MR findings)
ID	Disease/Trait		Unit of measurement (if applicable)	Original publication	Ethnicities and proportion	Methods for Correction for population stratification
GTEx	GTEx		Normalized expression	Gtex Consortium , PMID: 23715323	Majority European (84.6%); African American (12.9%), Asian (1.3%); American Indian (0.2%); unknown (1.1%)	Top 5 genotyping principal components from genotypes; a set of covariates identified using the Probabilistic Estimation of Expression Residuals (PEER) method, computed based on normalized expression matrices (please refer to https://gtexportal.org/home/documentationPage#staticTextAnalysisMethods)
Diabetes-related
ukb-b-10753	Diabetes diagnosed by doctor			MRC IEU UK Biobank GWAS pipeline version 2 (2019)	European	linear mixed model
ukb-b-12948	Non-cancer illness code, self-reported: diabetes			MRC IEU UK Biobank GWAS pipeline version 2 (2019)	European	linear mixed model
ukb-b-10694	Diagnoses - secondary ICD10: E10.9 Type I Diabetes mellitus without complications			MRC IEU UK Biobank GWAS pipeline version 2 (2019)	European	linear mixed model
ieu-a-23	Type 2 diabetes			Mahajan A, 2014; PMID: 24509480	Mixed. European: 62.5%, East Asians: 17.04%, South Asians: 18.12%, Mexican+Mexican American: 2.34%	2 rounds of genomic control; adjustment methods for constituent studies given in respective consoritum papers
ukb-b-8388	Started insulin within one year diagnosis of diabetes			MRC IEU UK Biobank GWAS pipeline version 2 (2019)	European	linear mixed model
Neoplasms
ukb-b-8549	Diagnoses - main ICD10: D24 Benign neoplasm of breast			MRC IEU UK Biobank GWAS pipeline version 2 (2019)	European	linear mixed model
ukb-d-D12	Diagnoses - main ICD10: D12 Benign neoplasm of colon, rectum, anus and anal canal			Neale lab, 2018	European	Principal components analysis (PCA; 20 components)
ukb-d-C3_RESPIRATORY_INTRATHORACIC	Malignant neoplasm of respiratory system and intrathoracic organs			Neale lab, 2018	European	PCA (20 components)
ukb-d-C34	Diagnoses - main ICD10: C34 Malignant neoplasm of bronchus and lung			Neale lab, 2018	European	PCA (20 components)
ieu-a-1134	ER+ Breast cancer (GWAS)			Michailidou K, 2017; PMID: 29059683	European (females only)	PCA (10 components)
ieu-a-1013	Glioma			Rajaraman P, 2013; PMID: 22886559	European	PCA (7 components and study)
Autoimmue disorders
ukb-b-18194	Non-cancer illness code, self-reported: ankylosing spondylitis			MRC IEU UK Biobank GWAS pipeline version 2 (2019)	European	linear mixed model
ieu-a-32	Ulcerative colitis			Liu, 2015; PMID: 26192919	European	linear mixed model
ieu-a-292	Inflammatory bowel disease			Jostins L, 2012; PMID:23128233	European	linear mixed model+PCA
ieu-a-30	Crohn's disease			Liu, 2015; PMID: 26192919	European	linear mixed model
ieu-a-31	Inflammatory bowel disease			Liu, 2015; PMID: 26192919	European	linear mixed model
Other diseases
ukb-b-17219	Diagnoses - secondary ICD10: J45.9 Asthma, unspecified			MRC IEU UK Biobank GWAS pipeline version 2 (2019)	European	linear mixed model
ukb-b-5115	Diagnoses - secondary ICD10: Z72.0 Tobacco use			MRC IEU UK Biobank GWAS pipeline version 2 (2019)	European	linear mixed model
ukb-b-6514	Non-cancer illness code, self-reported: hiatus hernia			MRC IEU UK Biobank GWAS pipeline version 2 (2019)	European	linear mixed model
ukb-b-8848	Diagnoses - main ICD10: K44.9 Diaphragmatic hernia without obstruction or gangrene			MRC IEU UK Biobank GWAS pipeline version 2 (2019)	European	linear mixed model
ukb-b-1386	Diagnoses - main ICD10: K21.9 Gastro-oesophageal reflux disease without oesophagitis			MRC IEU UK Biobank GWAS pipeline version 2 (2019)	European	linear mixed model
ukb-d-I9_DISVEINLYMPH	Diseases of veins, lymphatic vessels and lymph nodes, not elsewhere classified			Neale lab, 2018	European	PCA (20 components)
ukb-d-M48	Diagnoses - main ICD10: M48 Other spondylopathies			Neale lab, 2018	European	PCA (20 components)
ukb-d-N13	Diagnoses - main ICD10: N13 Obstructive and reflux uropathy			Neale lab, 2018	European	PCA (20 components)
Other risk factors or clinically relevant traits as exposure
ukb-b-15272	Ever manic/hyper for 2 days			MRC IEU UK Biobank GWAS pipeline version 2 (2019)	European	linear mixed model
ukb-d-30620_raw	Alanine aminotransferase		U/L	Neale lab, 2018	European	PCA (20 components)
ukb-d-30070_irnt	Red blood cell (erythrocyte) distribution width		SD	Neale lab, 2018	European	PCA (20 components)
ukb-d-30220_irnt	Basophill percentage		SD	Neale lab, 2018	European	PCA (20 components)
ukb-d-30780_raw	LDL direct		mmol/L	Neale lab, 2018	European	PCA (20 components)
ukb-d-30680_raw	Calcium		mmol/L	Neale lab, 2018	European	PCA (20 components)
ukb-d-30830_raw	SHBG		nmol/L	Neale lab, 2018	European	PCA (20 components)
ieu-a-793	Urate		mg/dl	Huffman JE, 2015; PMID: 25811787	European (males only)	Genomic control for each study
ieu-a-1034	Height		SD	Cousminer, 2013; PMID: 23449627	European	2 rounds of genomic control
ieu-a-299	HDL cholesterol		SD	Willer CJ, 2013; PMID: 24097068	European: 95.0%; Mixed. African: 1.64%, East Asian: 0.89%, South Asian: 2.47%	Genomic control before meta-analysis; PCA or mixed model for constituent studies
ieu-a-1089	Body mass index		kg/m2	Wood, 2016; PMID: 26961502	European	PCA
prot-a	blood proteins		SD; protein concentrations measured by relative fluorescent units.	Sun BB, PMID: 29875488	European	PCA
prot-b	blood proteins		quantified by real-time quantitative PCR, then log(10) transformations; CA-125: U/ml; the others:pg/ml	Folkersen L, PMID: 28369058	European	All European samples. Adjusted for recruitment centre (same population within each centre)

## Sheet: TableS2b_allTraits
Table S2b Source and other details of all traits included in our MR analysis (information extracted from IEU GWAS database)
id	trait	sample_size	nsnp	year	consortium	author	access	mr	sex	priority	pmid	population	sd	unit	subcategory	category	note	ncase	ncontrol
ukb-b-10753	Diabetes diagnosed by doctor	461578	9851867	2018	MRC-IEU	Ben Elsworth	public	1	Males and Females	1		European		SD	NA	Binary	2443: Output from GWAS pipeline using Phesant derived variables from UKBiobank	22340	439238
ukb-b-12948	Non-cancer illness code, self-reported: diabetes	462933	9851867	2018	MRC-IEU	Ben Elsworth	public	1	Males and Females	1		European		SD	NA	Binary	20002#1220: Output from GWAS pipeline using Phesant derived variables from UKBiobank	18228	444705
ukb-b-10694	Diagnoses - secondary ICD10: E10.9 Without complications	463010	9851867	2018	MRC-IEU	Ben Elsworth	public	1	Males and Females	1		European		SD	NA	Binary	41204#E109: Output from GWAS pipeline using Phesant derived variables from UKBiobank	2076	460934
ieu-a-23	Type 2 diabetes	110452	2915012	2014	NA	Mahajan A	public	1	Males and Females	1	24509480	Mixed		NA	Diabetes	Disease	Effect allele frequencies are missing; forward strand	26488	83964
ukb-b-8388	Started insulin within one year diagnosis of diabetes	21241	9851867	2018	MRC-IEU	Ben Elsworth	public	1	Males and Females	1		European		SD	NA	Binary	2986: Output from GWAS pipeline using Phesant derived variables from UKBiobank	2592	18649
ukb-b-8549	Diagnoses - main ICD10: D24 Benign neoplasm of breast	463010	9851867	2018	MRC-IEU	Ben Elsworth	public	1	Males and Females	1		European		SD	NA	Binary	41202#D24: Output from GWAS pipeline using Phesant derived variables from UKBiobank	1244	461766
ukb-d-D12	Diagnoses - main ICD10: D12 Benign neoplasm of colon, rectum, anus and anal canal	361194	13217521	2018	NA	Neale lab	public	1	Males and Females	0		European		NA	NA	Binary	NA	8877	352317
ukb-d-C3_RESPIRATORY_INTRATHORACIC	Malignant neoplasm of respiratory system and intrathoracic organs	361194	10401769	2018	NA	Neale lab	public	1	Males and Females	0		European		NA	NA	Binary	NA	1944	359250
ukb-d-C34	Diagnoses - main ICD10: C34 Malignant neoplasm of bronchus and lung	361194	10138608	2018	NA	Neale lab	public	1	Males and Females	0		European		NA	NA	Binary	NA	1427	359767
ieu-a-1134	ER+ Breast cancer (GWAS)	21814	10680257	2017	NA	Michailidou K	public	1	Females	1	29059683	European		NA	Cancer	Disease		4226	17588
ieu-a-1013	Glioma	6811	309636	2013	NA	Rajaraman P	public	1	Males and Females	1	22886559	European		NA	Cancer	Disease		1856	4955
ukb-b-18194	Non-cancer illness code, self-reported: ankylosing spondylitis	462933	9851867	2018	MRC-IEU	Ben Elsworth	public	1	Males and Females	1		European		SD	NA	Binary	20002#1313: Output from GWAS pipeline using Phesant derived variables from UKBiobank	1296	461637
ieu-a-32	Ulcerative colitis	27432	12255197	2015	NA	Liu	public	1	Males and Females	1	26192919	European		NA	Autoimmune / inflammatory	Disease		6968	20464
ieu-a-292	Inflammatory bowel disease	75000	14378	2012	NA	Jostins L	public	1	Males and Females	1	23128233	European		NA	Autoimmune / inflammatory	Disease
ieu-a-30	Crohn's disease	20883	12276506	2015	NA	Liu	public	1	Males and Females	1	26192919	European		NA	Autoimmune / inflammatory	Disease		5956	14927
ieu-a-31	Inflammatory bowel disease	34652	12716084	2015	NA	Liu	public	1	Males and Females	1	26192919	European		NA	Autoimmune / inflammatory	Disease		12882	21770
ukb-b-17219	Diagnoses - secondary ICD10: J45.9 Asthma, unspecified	463010	9851867	2018	MRC-IEU	Ben Elsworth	public	1	Males and Females	1		European		SD	NA	Binary	41204#J459: Output from GWAS pipeline using Phesant derived variables from UKBiobank	18988	444022
ukb-b-5115	Diagnoses - secondary ICD10: Z72.0 Tobacco use	463010	9851867	2018	MRC-IEU	Ben Elsworth	public	1	Males and Females	1		European		SD	NA	Binary	41204#Z720: Output from GWAS pipeline using Phesant derived variables from UKBiobank	13421	449589
ukb-b-6514	Non-cancer illness code, self-reported: hiatus hernia	462933	9851867	2018	MRC-IEU	Ben Elsworth	public	1	Males and Females	1		European		SD	NA	Binary	20002#1474: Output from GWAS pipeline using Phesant derived variables from UKBiobank	10662	452271
ukb-b-8848	Diagnoses - main ICD10: K44.9 Diaphragmatic hernia without obstruction or gangrene	463010	9851867	2018	MRC-IEU	Ben Elsworth	public	1	Males and Females	1		European		SD	NA	Binary	41202#K449: Output from GWAS pipeline using Phesant derived variables from UKBiobank	8072	454938
ukb-b-1386	Diagnoses - main ICD10: K21.9 Gastro-oesophageal reflux disease without oesophagitis	463010	9851867	2018	MRC-IEU	Ben Elsworth	public	1	Males and Females	1		European		SD	NA	Binary	41202#K219: Output from GWAS pipeline using Phesant derived variables from UKBiobank	4651	458359
ukb-d-I9_DISVEINLYMPH	Diseases of veins, lymphatic vessels and lymph nodes, not elsewhere classified	361194	13542754	2018	NA	Neale lab	public	1	Males and Females	0		European		NA	NA	Binary	NA	11867	349327
ukb-d-M48	Diagnoses - main ICD10: M48 Other spondylopathies	361194	10484433	2018	NA	Neale lab	public	1	Males and Females	0		European		NA	NA	Binary	NA	1890	359304
ukb-d-N13	Diagnoses - main ICD10: N13 Obstructive and reflux uropathy	361194	9916449	2018	NA	Neale lab	public	1	Males and Females	0		European		NA	NA	Binary	NA	1359	359835
ukb-b-15272	Ever manic/hyper for 2 days	149144	9851867	2018	MRC-IEU	Ben Elsworth	public	1	Males and Females	1		European		SD	NA	Binary	4642: Output from GWAS pipeline using Phesant derived variables from UKBiobank	8680	140464
ukb-d-30620_raw	Alanine aminotransferase		13586000	2018	NA	Neale lab	public	1	Males and Females	0		European		NA	NA	Metabolites	NA
ukb-d-30070_irnt	Red blood cell (erythrocyte) distribution width	350473	13586288	2018	NA	Neale lab	public	1	Males and Females	0		European		NA	NA	Continuous	NA
ukb-d-30220_irnt	Basophill percentage	349861	13586283	2018	NA	Neale lab	public	1	Males and Females	0		European		NA	NA	Continuous	NA
ukb-d-30780_raw	LDL direct		13586016	2018	NA	Neale lab	public	1	Males and Females	0		European		NA	NA	Metabolites	NA
ukb-d-30680_raw	Calcium		13585309	2018	NA	Neale lab	public	1	Males and Females	0		European		NA	NA	Metabolites	NA
ukb-d-30830_raw	SHBG		13585247	2018	NA	Neale lab	public	1	Males and Females	0		European		NA	NA	Metabolites	NA
ieu-a-793	Urate	10058	2640037	2015	NA	Huffman JE	public	1	Males	1	25811787	European	1.33	NA	Other	Risk factor	Obese men; effect allele frequencies are missing
ieu-a-1034	Height	13960	2479700	2013	NA	Cousminer	public	1	Males and Females	1	23449627	European		NA	Anthropometric	Risk factor	Females at age 10 and males at age 12; effect allele frequencies are missing
ieu-a-299	HDL cholesterol	187167	2447442	2013	NA	Willer CJ	public	1	Males and Females	1	24097068	Mixed	15.5102	NA	Lipid	Risk factor
ieu-a-1089	Body mass index	120286	8654252	2016	NA	Wood	public	0	Males and Females	1	26961502	European		NA	Anthropometric	Risk factor	Dominance model? If so then not necessarily of value for MR; Results from interim Biobank release enriched for smokers; could lead to bias through collider issues in MR
ieu-a-1	Adiponectin	39883	2675209	2012	NA	Dastani Z	public	1	Males and Females	1	22479202	Mixed	0.57	NA	Protein	Risk factor
ieu-a-10	Crohn's disease	30740	13898	2012	NA	Jostins L	public	1	Males and Females	1	23128233	European		NA	Autoimmune / inflammatory	Disease		14763	15977
ieu-a-1000	Depressive symptoms	161460	6524475	2016	NA	Okbay	public	1	Males and Females	1	27089181	European		NA	Psychiatric / neurological	Risk factor
ieu-a-1002	Leptin	32161	2474010	2016	NA	Kilpelainen	public	1	Males and Females	1	26833098	European		NA	Hormone	Risk factor	Adjusted for BMI; effect allele frequencies are missing
ieu-a-1004	Age at menopause	69360	2418696	2015	NA	Day	public	1	Females	1	26414677	European	3.93	NA	Reproductive aging	Risk factor
ieu-a-1005	Percent emphysema	7667	2968584	2014	NA	Manichaikul A	public	1	Males and Females	1	24383474	Mixed	0.708	NA	Lung disease	Risk factor
ieu-a-1006	Mean platelet volume	66867	2690859	2011	NA	Gieger C	public	1	Males and Females	1	22139419	European	0.109	NA	Haemotological	Risk factor	Effect allele frequencies are missing
ieu-a-1007	Neuroticism	170911	6524433	2016	NA	Okbay	public	1	Males and Females	1	27089181	European		NA	Personality	Risk factor
ieu-a-1008	Platelet count	66867	2703394	2011	NA	Gieger C	public	1	Males and Females	1	22139419	European	59.934	NA	Haemotological	Risk factor
ieu-a-1012	Plasma cortisol	12597	2660192	2014	NA	Bolton JL	public	1	Males and Females	1	25010111	European		NA	Hormone	Risk factor
ieu-a-1015	C-reactive protein	10112	2178019	2016	NA	Okada Y	public	1	Males and Females	1	21196492	East Asian		NA	Immune system	Risk factor
ieu-a-1016	Oligoclonal band status	3026	485523	2015	NA	Goris A	public	1	Males and Females	1	25616667	European		NA	Immune system	Risk factor	All subjects had multiple sclerosis; effect allele frequeinces are missing	363	2663
ieu-a-1017	Immunoglobulin G index levels	938	242775	2015	NA	Goris A	public	1	Males and Females	1	25616667	European	3.44	NA	Immune system	Risk factor	All subjects had multiple sclerosis; effect allele frequeinces are missing
ieu-a-1019	Migraine in bipolar disorder	1374	723225	2015	NA	Jacobsen KK	public	1	Males and Females	1	25451450	European		NA	Psychiatric / neurological	Risk factor		460	924
ieu-a-1024	Multiple sclerosis	27098	465435	2011	NA	Sawcer S	public	1	Males and Females	1	21833088	European		NA	Autoimmune / inflammatory	Disease		9722	17376
ieu-a-1025	Multiple sclerosis	38589	156632	2013	NA	Beecham	public	1	Males and Females	1	24076602	European		NA	Autoimmune / inflammatory	Disease		14498	24091
ieu-a-1049	Iron	23986	2096457	2014	NA	Benyamin	public	1	Males and Females	1	25352340	European		NA	Metal	Risk factor	Effect allele frequencies are missing
ieu-a-1050	Ferritin	23986	2036124	2014	NA	Benyamin	public	1	Males and Females	1	25352340	European		NA	Metal	Risk factor	Effect allele frequencies are missing
ieu-a-1051	Transferrin Saturation	23986	2102226	2014	NA	Benyamin	public	1	Males and Females	1	25352340	European		NA	Metal	Risk factor	Effect allele frequencies are missing
ieu-a-1052	Transferrin	23986	2104242	2014	NA	Benyamin	public	1	Males and Females	1	25352340	European		NA	Metal	Risk factor	Effect allele frequencies are missing
ieu-a-1054	Gout	69374	2450548	2013	NA	Kottgen	public	1	Males and Females	1	23263486	European		NA	Autoimmune / inflammatory	Disease	Effect allele frequencies are missing	2115	67259
ieu-a-1055	Urate	110347	2450548	2013	NA	Kottgen	public	1	Males and Females	1	23263486	European	1.33	NA	Other	Risk factor	Effect allele frequencies are missing
ieu-a-1056	Heart rate	92355	2516790	2013	NA	den Hoed M	public	1	Males and Females	1	23583979	Mixed		NA	Hemodynamic	Risk factor	92% European
ieu-a-1058	Celiac disease	24269	38037	2011	NA	Trynka	public	1	Males and Females	1	22057235	European		NA	Autoimmune / inflammatory	Disease	Immuno-chip; effect allele frequencies are missing	12041	12228
ieu-a-1059	Celiac disease	15283	292388	2010	NA	Dubois	public	1	Males and Females	1	20190752	European		NA	Autoimmune / inflammatory	Disease	Effect allele frequencies are missing	4533	10750
ieu-a-106	Weight	60586	2760790	2013	NA	Randall JC	public	1	Males	1	23754948	European	13.36	NA	Anthropometric	Risk factor
ieu-a-1060	Celiac disease	11950	231359	2010	NA	Dubois	public	1	Males and Females	1	20190752	European		NA	Autoimmune / inflammatory	Disease	Effect allele frequencies are missing	3796	8154
ieu-a-1070	Sitting height ratio	21590	7710729	2015	NA	Chan	public	1	Males and Females	1	25865494	European		NA	Anthropometric	Risk factor	Ratio of sitting height to total height; effect allele frequencies are missing
ieu-a-1073	Copper	2603	2543646	2013	NA	Evans	public	1	Males and Females	1	23720494	European		NA	Metal	Risk factor	Effect allele frequencies are missing
ieu-a-1075	Selenium	2874	2451527	2013	NA	Evans	public	1	Females	1	23720494	European		NA	Metal	Risk factor	Effect allele frequencies are missing
ieu-a-1079	Zinc	2603	2543610	2013	NA	Evans	public	1	Males and Females	1	23720494	European		NA	Metal	Risk factor	Effect allele frequencies are missing
ieu-a-1081	IgA nephropathy	5957	278077	2010	NA	Feehally J	public	1	Males and Females	1	20595679	European		NA	Kidney	Disease		977	4980
ieu-a-1082	Thyroid cancer	1080	572028	2013	NA	Kohler A	public	1	Males and Females	1	23894154	European		NA	Cancer	Disease		649	431
ieu-a-1085	Amyotrophic lateral sclerosis	36052	7740345	2016	NA	van Rheenen	public	1	Males and Females	1	27455348	European		NA	Psychiatric / neurological	Disease	Results from linear mixed model	12577	23475
ieu-a-1086	Amyotrophic lateral sclerosis	36052	8709432	2016	NA	van Rheenen	public	1	Males and Females	1	27455348	European		NA	Psychiatric / neurological	Disease	Results from fixed effects meta-analysis	12577	23475
ieu-a-1090	Type 2 diabetes	120286	8404296	2016	NA	Wood	public	0	Males and Females	1	26961502	European		NA	Diabetes	Disease	Dominance model? If so then not necessarily of value for MR; Results from interim Biobank release enriched for smokers; could lead to bias through collider issues in MR	4040	116246
ieu-a-1091	Top 1 % survival	75244	9583643	2016	NA	Pilling	public	1	Males and Females	1	27015805	European		NA	Aging	Risk factor	At least one parent in top 1% of parents attained age; Results from interim Biobank release enriched for smokers; could lead to bias through collider issues in MR
ieu-a-1095	Age at menarche	182416	2441816	2014	NA	Perry JR	public	1	Females	1	25231870	European		NA	Reproductive aging	Risk factor
ieu-a-1096	Childhood obesity	13848	2442739	2012	NA	Bradfield JP	public	1	Males and Females	1	22484627	European		NA	Anthropometric	Risk factor	Effect allele frequencies are missing	5530	8318
ieu-a-1097	Microalbuminuria	54116	2191461	2015	NA	Teumer	public	1	Males and Females	1	26631737	European		NA	Kidney	Risk factor
ieu-a-11	Crohn's disease	5409	154590	2015	NA	Liu	public	1	Males and Females	1	26192919	East Asian		NA	Autoimmune / inflammatory	Disease		1690	3719
ieu-a-1102	Chronic kidney disease	117165	2191877	2015	NA	Pattaro	public	1	Males and Females	1	26831199	Mixed		NA	Kidney	Disease		12385	104780
ieu-a-1105	Serum creatinine (eGFRcrea)	133814	2198208	2015	NA	Pattaro	public	1	Males and Females	1	26831199	Mixed	0.24	NA	Kidney	Risk factor
ieu-a-1106	Serum cystatin C (eGFRcys)	33152	2197556	2015	NA	Pattaro	public	1	Males and Females	1	26831199	Mixed	0.23	NA	Kidney	Risk factor
ieu-a-1107	Urinary albumin-to-creatinine ratio	54450	2190189	2015	NA	Teumer	public	1	Males and Females	1	26631737	European	0.96	NA	Kidney	Risk factor
ieu-a-1108	Ischemic stroke	29633	2421920	2016	NA	Malik	public	1	Males and Females	1	26935894	Mixed		NA	Cardiovascular	Disease		10307	19326
ieu-a-1109	Cardioembolic stroke	21185	2421920	2016	NA	Malik	public	1	Males and Females	1	26935894	Mixed		NA	Cardiovascular	Disease		1859	19326
ieu-a-1110	Large vessel disease	21143	2421920	2016	NA	Malik	public	1	Males and Females	1	26935894	Mixed		NA	Cardiovascular	Disease		1817	19326
ieu-a-1112	Primary sclerosing cholangitis	14890	7891603	2017	NA	Ji	public	1	Males and Females	1	27992413	Mixed		NA	Autoimmune / inflammatory	Disease		2871	12019
ieu-a-1120	Ovarian cancer	66450	0	2017	NA	Phelan	public	1	Females	1	28346442	European		NA	Cancer	Disease		25509	40941
ieu-a-1121	High grade serous ovarian cancer	53978	0	2017	NA	Phelan	public	1	Females	1	28346442	European		NA	Cancer	Disease		13037	40941
ieu-a-1123	Invasive mucinous ovarian cancer	42358	0	2017	NA	Phelan	public	1	Females	1	28346442	European		NA	Cancer	Disease		1417	40941
ieu-a-1124	Clear cell ovarian cancer	42307	0	2017	NA	Phelan	public	1	Females	1	28346442	European		NA	Cancer	Disease		1366	40941
ieu-a-1126	Breast cancer (Combined Oncoarray; iCOGS; GWAS meta analysis)	228951	10680257	2017	NA	Michailidou K	public	1	Females	1	29059683	European		NA	Cancer	Disease		122977	105974
ieu-a-1127	ER+ Breast cancer (Combined Oncoarray; iCOGS; GWAS meta analysis)	175475	10680257	2017	NA	Michailidou K	public	1	Females	1	29059683	European		NA	Cancer	Disease		69501	105974
ieu-a-1128	ER- Breast cancer (Combined Oncoarray; iCOGS; GWAS meta analysis)	127442	10680257	2017	NA	Michailidou K	public	1	Females	1	29059683	European		NA	Cancer	Disease		21468	105974
ieu-a-1129	Breast cancer (Oncoarray)	106776	10680257	2017	NA	Michailidou K	public	1	Females	1	29059683	European		NA	Cancer	Disease		61282	45494
ieu-a-1130	Breast cancer (iCOGS)	89677	10680257	2017	NA	Michailidou K	public	1	Females	1	29059683	European		NA	Cancer	Disease		46785	42892
ieu-a-1131	Breast cancer (GWAS)	32498	10680257	2017	NA	Michailidou K	public	1	Females	1	29059683	European		NA	Cancer	Disease		14910	17588
ieu-a-1132	ER+ Breast cancer (Oncoarray)	83691	10680257	2017	NA	Michailidou K	public	1	Females	1	29059683	European		NA	Cancer	Disease		38197	45494
ieu-a-1133	ER+ Breast cancer (iCOGS)	69970	10680257	2017	NA	Michailidou K	public	1	Females	1	29059683	European		NA	Cancer	Disease		27078	42892
ieu-a-1135	ER- Breast cancer (Oncoarray)	55149	10680257	2017	NA	Michailidou K	public	1	Females	1	29059683	European		NA	Cancer	Disease		9655	45494
ieu-a-1136	ER- Breast cancer (iCOGS)	50225	10680257	2017	NA	Michailidou K	public	1	Females	1	29059683	European		NA	Cancer	Disease		7333	42892
ieu-a-1137	ER- Breast cancer (GWAS)	22068	10680257	2017	NA	Michailidou K	public	1	Females	1	29059683	European		NA	Cancer	Disease		4480	17588
ieu-a-1163	ER- Breast cancer (Survival)	6881	8828662	2015	NA	Guo Q	public	1	Females	1	25890600	European		NA	Cancer	Disease		920	5961
ieu-a-1165	Breast cancer (Survival)	37954	12940150	2015	NA	Guo Q	public	1	Females	1	25890600	European		NA	Cancer	Disease		2900	35054
ieu-a-12	Crohn's disease	51874	124888	2015	NA	Liu	public	1	Males and Females	1	26192919	European		NA	Autoimmune / inflammatory	Disease		17897	33977
ieu-a-1228	High grade and low grade serous ovarian cancer	54990	0	2017	NA	Phelan	public	1	Females	1	28346442	European		NA	Cancer	Disease	NA	14049	40941
ieu-a-1229	Serous ovarian cancer: low grade and low malignant potential	43907	0	2017	NA	Phelan	public	1	Females	1	28346442	European		NA	Cancer	Disease	NA	2966	40941
ieu-a-1230	Serous ovarian cancer: low malignant potential	42895	0	2017	NA	Phelan	public	1	Females	1	28346442	European		NA	Cancer	Disease	NA	1954	40941
ieu-a-1231	Mucinous ovarian cancer: invasive and low malignant potential	43507	0	2017	NA	Phelan	public	1	Females	1	28346442	European		NA	Cancer	Disease	NA	2566	40941
ieu-a-1232	Low malignant potential mucinous ovarian cancer	42090	0	2017	NA	Phelan	public	1	Females	1	28346442	European		NA	Cancer	Disease	NA	1149	40941
ieu-a-1233	Low malignant potential ovarian cancer	47147	0	2017	NA	Phelan	public	1	Females	1	28346442	European		NA	Cancer	Disease	NA	3103	40941
ieu-a-1239	Years of schooling	766345	10101242	2018	NA	Lee	public	1	Males and Females	1	30038396	European	4.2	NA	Education	Risk factor	NA
ieu-a-1283	Alcohol consumption	112117	12935395	2017	NA	Clarke	public	1	Males and Females	1	28937693	European		NA	Behavioural	Risk factor	NA
ieu-a-1284	Estimated glomerular filtration rate (eGFR)	143658	5961601	2018	NA	Kanai	public	1	Males and Females	1	29403010	East Asian		NA	NA	Risk factor	NA
ieu-a-13	Crohn's disease	1174	154590	2015	NA	Liu	public	1	Males and Females	1	26192919	South Asian		NA	Autoimmune / inflammatory	Disease		184	990
ieu-a-2	Body mass index	339224	2555511	2015	NA	Locke AE	public	1	Males and Females	1	25673413	Mixed	4.77	NA	Anthropometric	Risk factor
ieu-a-22	Schizophrenia	82315	9444231	2014	NA	Ripke S	public	1	Males and Females	1	25056061	Mixed		NA	Psychiatric / neurological	Disease	Effect allele frequencies are missing	35476	46839
ieu-a-270	Haemoglobin concentration	71861	2593079	2012	NA	van der Harst P	public	1	Males and Females	1	23222517	Mixed	1.27636	NA	Haemotological	Risk factor	Effect allele frequencies are missing
ieu-a-271	Mean cell haemoglobin	64731	2586785	2012	NA	van der Harst P	public	1	Males and Females	1	23222517	Mixed	1.98758	NA	Haemotological	Risk factor	Effect allele frequencies are missing
ieu-a-272	Mean cell haemoglobin concentration	67852	2588876	2012	NA	van der Harst P	public	1	Males and Females	1	23222517	Mixed	1.01321	NA	Haemotological	Risk factor	Effect allele frequencies are missing
ieu-a-273	Mean cell volume	69335	2591133	2012	NA	van der Harst P	public	1	Males and Females	1	23222517	Mixed	5.19353	NA	Haemotological	Risk factor	Effect allele frequencies are missing
ieu-a-274	Packed cell volume	63511	2591080	2012	NA	van der Harst P	public	1	Males and Females	1	23222517	Mixed	5.9	NA	Haemotological	Risk factor	Effect allele frequencies are missing
ieu-a-275	Red blood cell count	66214	2589455	2012	NA	van der Harst P	public	1	Males and Females	1	23222517	Mixed	0.48	NA	Haemotological	Risk factor	Effect allele frequencies are missing
ieu-a-276	Celiac disease	15283	523399	2010	NA	Dubois PC	public	1	Males and Females	1	20190752	European		NA	Autoimmune / inflammatory	Disease	Effect allele frequencies are missing	4533	10750
ieu-a-293	Inflammatory bowel disease	6543	157116	2015	NA	Liu	public	1	Males and Females	1	26192919	East Asian		NA	Autoimmune / inflammatory	Disease		2824	3719
ieu-a-294	Inflammatory bowel disease	65642	157116	2015	NA	Liu	public	1	Males and Females	1	26192919	European		NA	Autoimmune / inflammatory	Disease		31665	33977
ieu-a-295	Inflammatory bowel disease	2413	157116	2015	NA	Liu	public	1	Males and Females	1	26192919	South Asian		NA	Autoimmune / inflammatory	Disease		1423	990
ieu-a-298	Alzheimer's disease	74046	11633	2013	NA	Lambert	public	1	Males and Females	1	24162737	European		NA	Psychiatric / neurological	Disease	Exposure only; Effect allele frequencies are missing; forward(+) strand	25580	48466
ieu-a-300	LDL cholesterol	173082	2437752	2013	NA	Willer CJ	public	1	Males and Females	1	24097068	Mixed	38.6746	NA	Lipid	Risk factor
ieu-a-301	Total cholesterol	187365	2446982	2013	NA	Willer CJ	public	1	Males and Females	1	24097068	Mixed	41.7507	NA	Lipid	Risk factor
ieu-a-302	Triglycerides	177861	2439433	2013	NA	Willer CJ	public	1	Males and Females	1	24097068	Mixed	90.7242	NA	Lipid	Risk factor
ieu-a-44	Asthma	26475	546183	2007	NA	Moffatt MF	public	1	Males and Females	1	20860503	European		NA	Autoimmune / inflammatory	Disease		10365	16110
ieu-a-45	Anorexia nervosa	17767	1149254	2014	NA	Boraska V	public	1	Males and Females	1	24514567	European		NA	Psychiatric / neurological	Disease	Effect allele frequecies are missing	2907	14860
ieu-a-48	Hip circumference	224459	2561447	2015	NA	Shungin D	public	1	Males and Females	1	25673412	Mixed	8.4548	NA	Anthropometric	Risk factor
ieu-a-60	Waist circumference	224459	2566630	2015	NA	Shungin D	public	1	Males and Females	1	25673412	Mixed	12.52	NA	Anthropometric	Risk factor
ieu-a-7	Coronary heart disease	184305	9455779	2015	NA	Nikpay	public	1	Males and Females	1	26343387	Mixed		NA	Cardiovascular	Disease		60801	123504
ieu-a-72	Waist-to-hip ratio	224459	2562516	2015	NA	Shungin D	public	1	Males and Females	1	25673412	Mixed	0.0760794	NA	Anthropometric	Risk factor	Effect allele frequecies are missing
ieu-a-758	HbA1C	46368	2576680	2010	NA	Soranzo N	public	1	Males and Females	1	20858683	European	0.534285	NA	Glycemic	Risk factor	Glycated hemoglobin
ieu-a-761	Corrected insulin response	5318	2425234	2014	NA	Prokopenko	public	1	Males and Females	1	24699409	European	925.21	NA	Glycemic	Risk factor	Insulin secretion. SD value corresponds to original distribution
ieu-a-769	Fasting proinsulin	10701	2496074	2011	NA	Dupuis J	public	1	Males and Females	1	20081858	European	0.81	NA	Glycemic	Risk factor
ieu-a-770	HOMA-B	46186	2456946	2011	NA	Dupuis J	public	1	Males and Females	1	20081858	European	0.957384	NA	Glycemic	Risk factor	Homeostatic model assessment (HOMA) for beta-cell function
ieu-a-776	2hr glucose	42854	63984	2013	NA	Scott	public	1	Males and Females	1	22885924	European	1.26801	NA	Glycemic	Risk factor
ieu-a-777	Fasting glucose	133010	64494	2012	NA	Scott	public	1	Males and Females	1	22885924	European	0.7303	NA	Glycemic	Risk factor
ieu-a-779	Fasting insulin	108557	64436	2013	NA	Scott	public	1	Males and Females	1	22885924	European	0.79	NA	Glycemic	Risk factor
ieu-a-798	Myocardial infarction	171875	9289492	2015	NA	Nikpay	public	1	Males and Females	1	26343387	Mixed		NA	Cardiovascular	Disease		43676	128199
ieu-a-801	Bipolar disorder	16731	2427221	2011	NA	Sklar P	public	1	Males and Females	1	21926972	European		NA	Psychiatric / neurological	Disease	Full	7481	9250
ieu-a-803	PGC cross-disorder traits	61220	1249700	2013	NA	Smoller JW	public	1	Males and Females	1	23453885	European		NA	Psychiatric / neurological	Disease	PGC (psychiatric genomics consortium)	33332	27888
ieu-a-806	Autism	10263	9499590	2015	NA		public	1	Males and Females	1		European		NA	Psychiatric / neurological	Disease		4949	5314
ieu-a-814	Ischaemic stroke	517	393465	2007	NA	Matarin M	public	1	Males and Females	1	17434096	European		NA	Cardiovascular	Disease	Effect allele frequencies are missing	249	268
ieu-a-815	Systemic lupus erythematosus	3094	489877	2008	NA	Hom G	public	1	Males and Females	1	18204098	European		NA	Autoimmune / inflammatory	Disease	Effect allele frequencies are missing	1311	1783
ieu-a-816	Neuroblastoma	4881	468788	2013	NA	Capasso M	public	1	Males and Females	1	23222812	European		NA	Cancer	Disease	Effect allele frequencies are missing	1627	3254
ieu-a-831	Rheumatoid arthritis	22515	6619872	2014	NA	Okada Y	public	1	Males and Females	1	24390342	East Asian		NA	Autoimmune / inflammatory	Disease	Effect allele frequencies are missing; forward strand build 37	4873	17642
ieu-a-832	Rheumatoid arthritis	58284	8747963	2014	NA	Okada Y	public	1	Males and Females	1	24390342	European		NA	Autoimmune / inflammatory	Disease	Effect allele frequencies are missing; forward strand build 37	14361	43923
ieu-a-833	Rheumatoid arthritis	80799	9739304	2014	NA	Okada Y	public	1	Males and Females	1	24390342	Mixed		NA	Autoimmune / inflammatory	Disease	Effect allele frequencies are missing; forward strand build 37	19234	61565
ieu-a-85	Extreme body mass index	16068	1984814	2013	NA	Berndt SI	public	1	Males and Females	1	23563607	European		NA	Anthropometric	Risk factor		7962	8106
ieu-a-86	Extreme height	16196	1966557	2013	NA	Berndt SI	public	1	Males and Females	1	23563607	European		NA	Anthropometric	Risk factor		8097	8099
ieu-a-87	Extreme waist-to-hip ratio	10255	1939901	2013	NA	Berndt SI	public	1	Males and Females	1	23563607	European		NA	Anthropometric	Risk factor		4774	5481
ieu-a-89	Height	253288	2550859	2014	NA	Wood AR	public	1	Males and Females	1	25282103	European	0.0699	NA	Anthropometric	Risk factor
ieu-a-9	Coronary heart disease	194427	79129	2013	NA	Deloukas	public	1	Males and Females	1	23202125	Mixed		NA	Cardiovascular	Disease		63746	130681
ieu-a-90	Obesity class 1	98697	2380428	2013	NA	Berndt SI	public	1	Males and Females	1	23563607	European		NA	Anthropometric	Risk factor		32858	65839
ieu-a-91	Obesity class 2	72546	2331456	2013	NA	Berndt SI	public	1	Males and Females	1	23563607	European		NA	Anthropometric	Risk factor		9889	62657
ieu-a-92	Obesity class 3	50364	2250779	2013	NA	Berndt SI	public	1	Males and Females	1	23563607	European		NA	Anthropometric	Risk factor		2896	47468
ieu-a-93	Overweight	158855	2435045	2013	NA	Berndt SI	public	1	Males and Females	1	23563607	European		NA	Anthropometric	Risk factor		93015	65840
ieu-a-961	Cigarettes smoked per day	68028	2459119	2010	NA	Furberg	public	1	Males and Females	1	20418890	European	11.6978	NA	Behavioural	Risk factor
ieu-a-965	Lung adenocarcinoma	18336	8881354	2014	NA	Wang Y	public	1	Males and Females	1	24880342	European		NA	Cancer	Disease		3442	14894
ieu-a-966	Lung cancer	27209	8945893	2014	NA	Wang Y	public	1	Males and Females	1	24880342	European		NA	Cancer	Disease		11348	15861
ieu-a-967	Squamous cell lung cancer	18313	8893750	2014	NA	Wang Y	public	1	Males and Females	1	24880342	European		NA	Cancer	Disease		3275	15038
ieu-a-968	Ulcerative colitis	26897	10662	2012	NA	Jostins L	public	1	Males and Females	1	23128233	European		NA	Autoimmune / inflammatory	Disease		10920	15977
ieu-a-969	Ulcerative colitis	4853	156116	2015	NA	Liu	public	1	Males and Females	1	26192919	East Asian		NA	Autoimmune / inflammatory	Disease		1134	3719
ieu-a-970	Ulcerative colitis	47745	156116	2015	NA	Liu	public	1	Males and Females	1	26192919	European		NA	Autoimmune / inflammatory	Disease		13768	33977
ieu-a-971	Ulcerative colitis	2229	156116	2015	NA	Liu	public	1	Males and Females	1	26192919	South Asian		NA	Autoimmune / inflammatory	Disease		1239	990
ieu-a-975	Paget's disease	3440	2479235	2011	NA	Albagha OM	public	1	Males and Females	1	21623375	European		NA	Bone	Disease		741	2699
ieu-a-977	Forearm bone mineral density	8143	9955366	2015	NA	Zheng	public	1	Males and Females	1	26367794	Mixed	0.08	NA	Bone	Risk factor	SD value corresponds to original distribution
ieu-a-980	Femoral neck bone mineral density	32735	10586900	2015	NA	Zheng	public	1	Males and Females	1	26367794	Mixed	0.41	NA	Bone	Risk factor	SD value corresponds to original distribution
ieu-a-982	Lumbar spine bone mineral density	28498	10582867	2015	NA	Zheng	public	1	Males and Females	1	26367794	Mixed	0.62	NA	Bone	Risk factor	SD value corresponds to original distribution
ieu-a-983	Hirschsprung's disease	788	6512684	2010	NA	Tang	public	1	Males and Females	1	20361209	East Asian		NA	Paediatric disease	Disease		173	615
ieu-a-990	Bulimia nervosa	2442	11846513	2013	NA	Wade TD	public	1	Females	1	23568457	European		NA	Psychiatric / neurological	Disease		151	2291
ieu-a-996	Eczema	40835	11059641	2014	NA	Paternoster	public	1	Males and Females	1	26482879	European		NA	Autoimmune / inflammatory	Disease	23andME excluded	10788	30047
ieu-a-999	Body fat	100716	3228665	2016	NA	Lu	public	1	Males and Females	1	26833246	European	6.81	NA	Anthropometric	Risk factor	89% European. SD value corresponds to original distribution
met-c-841	Albumin	18960	11703182	2016	NA	Kettunen	public	1	Males and Females	1	27005778	European		NA	Protein	Metabolites	Alb
met-c-842	Apolipoprotein A-I	20687	11760646	2016	NA	Kettunen	public	1	Males and Females	1	27005778	European	0.32	NA	Protein	Metabolites	ApoA1; SD value comes from the original untransformed distribution of the ERF cohort
met-c-843	Apolipoprotein B	20690	11813266	2016	NA	Kettunen	public	1	Males and Females	1	27005778	European	0.52	NA	Protein	Metabolites	ApoB; SD value comes from the original untransformed distribution of the ERF cohort
met-c-862	Glycoproteins	18734	11512434	2016	NA	Kettunen	public	1	Males and Females	1	27005778	European		NA	Protein	Metabolites	Gly
met-c-863	Glycoprotein acetyls	19270	11820605	2016	NA	Kettunen	public	1	Males and Females	1	27005778	European		NA	Protein	Metabolites	Gp; mainly a1-acid glycoprotein
prot-a-1	APOBEC1 complementation factor	3301	10534735	2018	NA	Sun BB	public	1	Males and Females	0	29875488	European		NA	Protein	Immune system	NA
prot-a-10	Histo-blood group ABO system transferase	3301	10534735	2018	NA	Sun BB	public	1	Males and Females	0	29875488	European		NA	Protein	Immune system	NA
prot-a-100	Angiopoietin-related protein 7	3301	10534735	2018	NA	Sun BB	public	1	Males and Females	0	29875488	European		NA	Protein	Immune system	NA
prot-a-1000	RNA-binding protein EWS	3301	10534735	2018	NA	Sun BB	public	1	Males and Females	0	29875488	European		NA	Protein	Immune system	NA
prot-a-1002	Exosome complex component RRP40	3301	10534735	2018	NA	Sun BB	public	1	Males and Females	0	29875488	European		NA	Protein	Immune system	NA
prot-a-1003	Exostosin-like 2	3301	10534735	2018	NA	Sun BB	public	1	Males and Females	0	29875488	European		NA	Protein	Immune system	NA
prot-a-1004	Ezrin	3301	10534735	2018	NA	Sun BB	public	1	Males and Females	0	29875488	European		NA	Protein	Immune system	NA
prot-a-1005	Coagulation factor Xa	3301	10534735	2018	NA	Sun BB	public	1	Males and Females	0	29875488	European		NA	Protein	Immune system	NA
prot-a-1006	Coagulation Factor X	3301	10534735	2018	NA	Sun BB	public	1	Males and Females	0	29875488	European		NA	Protein	Immune system	NA
prot-a-1009	Coagulation Factor VIII	3301	10534735	2018	NA	Sun BB	public	1	Males and Females	0	29875488	European		NA	Protein	Immune system	NA
prot-a-1011	Fatty acid-binding protein, liver	3301	10534735	2018	NA	Sun BB	public	1	Males and Females	0	29875488	European		NA	Protein	Immune system	NA
prot-a-1018	Fumarylacetoacetase	3301	10534735	2018	NA	Sun BB	public	1	Males and Females	0	29875488	European		NA	Protein	Immune system	NA
prot-a-1019	Fas apoptotic inhibitory molecule 3	3301	10534735	2018	NA	Sun BB	public	1	Males and Females	0	29875488	European		NA	Protein	Immune system	NA
prot-a-1027	Protein FAM163A	3301	10534735	2018	NA	Sun BB	public	1	Males and Females	0	29875488	European		NA	Protein	Immune system	NA
prot-a-103	Ankyrin repeat domain-containing protein 46	3301	10534735	2018	NA	Sun BB	public	1	Males and Females	0	29875488	European		NA	Protein	Immune system	NA
prot-a-1031	Protein FAM171B	3301	10534735	2018	NA	Sun BB	public	1	Males and Females	0	29875488	European		NA	Protein	Immune system	NA
prot-a-1033	Protein FAM173A	3301	10534735	2018	NA	Sun BB	public	1	Males and Females	0	29875488	European		NA	Protein	Immune system	NA
prot-a-1037	Protein FAM177A1	3301	10534735	2018	NA	Sun BB	public	1	Males and Females	0	29875488	European		NA	Protein	Immune system	NA
prot-a-1038	Protein FAM189A2	3301	10534735	2018	NA	Sun BB	public	1	Males and Females	0	29875488	European		NA	Protein	Immune system	NA
prot-a-1041	Protein FAM19A3	3301	10534735	2018	NA	Sun BB	public	1	Males and Females	0	29875488	European		NA	Protein	Immune system	NA
prot-a-1042	Protein FAM19A4	3301	10534735	2018	NA	Sun BB	public	1	Males and Females	0	29875488	European		NA	Protein	Immune system	NA
prot-a-1043	Protein FAM19A5	3301	10534735	2018	NA	Sun BB	public	1	Males and Females	0	29875488	European		NA	Protein	Immune system	NA
prot-a-1045	Pseudokinase FAM20A	3301	10534735	2018	NA	Sun BB	public	1	Males and Females	0	29875488	European		NA	Protein	Immune system	NA
prot-a-1046	Glycosaminoglycan xylosylkinase	3301	10534735	2018	NA	Sun BB	public	1	Males and Females	0	29875488	European		NA	Protein	Immune system	NA
prot-a-1047	Redox-regulatory protein FAM213A	3301	10534735	2018	NA	Sun BB	public	1	Males and Females	0	29875488	European		NA	Protein	Immune system	NA
prot-a-1048	Protein FAM24B	3301	10534735	2018	NA	Sun BB	public	1	Males and Females	0	29875488	European		NA	Protein	Immune system	NA
prot-a-1049	Protein FAM3B	3301	10534735	2018	NA	Sun BB	public	1	Males and Females	0	29875488	European		NA	Protein	Immune system	NA
prot-a-105	Acidic leucine-rich nuclear phosphoprotein 32 family member B	3301	10534735	2018	NA	Sun BB	public	1	Males and Females	0	29875488	European		NA	Protein	Immune system	NA
prot-a-1050	Protein FAM3B	3301	10534735	2018	NA	Sun BB	public	1	Males and Females	0	29875488	European		NA	Protein	Immune system	NA
prot-a-1051	Protein FAM3D	3301	10534735	2018	NA	Sun BB	public	1	Males and Females	0	29875488	European		NA	Protein	Immune system	NA
prot-a-1054	Prolyl endopeptidase FAP	3301	10534735	2018	NA	Sun BB	public	1	Males and Females	0	29875488	European		NA	Protein	Immune system	NA
prot-a-1055	Phenylalanine--tRNA ligase, mitochondrial	3301	10534735	2018	NA	Sun BB	public	1	Males and Females	0	29875488	European		NA	Protein	Immune system	NA
prot-a-1056	Tumor necrosis factor receptor superfamily member 6	3301	10534735	2018	NA	Sun BB	public	1	Males and Females	0	29875488	European		NA	Protein	Immune system	NA
prot-a-1057	Tumor necrosis factor receptor superfamily member 6	3301	10534735	2018	NA	Sun BB	public	1	Males and Females	0	29875488	European		NA	Protein	Immune system	NA
prot-a-1058	Tumor necrosis factor receptor superfamily member 6	3301	10534735	2018	NA	Sun BB	public	1	Males and Females	0	29875488	European		NA	Protein	Immune system	NA
prot-a-1065	F-box/LRR-repeat protein 4	3301	10534735	2018	NA	Sun BB	public	1	Males and Females	0	29875488	European		NA	Protein	Immune system	NA
prot-a-107	Annexin A1	3301	10534735	2018	NA	Sun BB	public	1	Males and Females	0	29875488	European		NA	Protein	Immune system	NA
prot-a-1072	Low affinity immunoglobulin epsilon Fc receptor	3301	10534735	2018	NA	Sun BB	public	1	Males and Females	0	29875488	European		NA	Protein	Immune system	NA
prot-a-1074	Low affinity immunoglobulin gamma Fc region receptor II-a	3301	10534735	2018	NA	Sun BB	public	1	Males and Females	0	29875488	European		NA	Protein	Immune system	NA
prot-a-1075	Low affinity immunoglobulin gamma Fc region receptor II-b	3301	10534735	2018	NA	Sun BB	public	1	Males and Females	0	29875488	European		NA	Protein	Immune system	NA
prot-a-1076	Low affinity immunoglobulin gamma Fc region receptor III-B	3301	10534735	2018	NA	Sun BB	public	1	Males and Females	0	29875488	European		NA	Protein	Immune system	NA
prot-a-1077	Ficolin-1	3301	10534735	2018	NA	Sun BB	public	1	Males and Females	0	29875488	European		NA	Protein	Immune system	NA
prot-a-1078	Ficolin-2	3301	10534735	2018	NA	Sun BB	public	1	Males and Females	0	29875488	European		NA	Protein	Immune system	NA
prot-a-108	Annexin A2	3301	10534735	2018	NA	Sun BB	public	1	Males and Females	0	29875488	European		NA	Protein	Immune system	NA
prot-a-1081	Fc receptor-like protein 3	3301	10534735	2018	NA	Sun BB	public	1	Males and Females	0	29875488	European		NA	Protein	Immune system	NA
prot-a-1082	Fc receptor-like protein 4	3301	10534735	2018	NA	Sun BB	public	1	Males and Females	0	29875488	European		NA	Protein	Immune system	NA
prot-a-1084	Fc receptor-like protein 6	3301	10534735	2018	NA	Sun BB	public	1	Males and Females	0	29875488	European		NA	Protein	Immune system	NA
prot-a-1088	Fibroblast growth factor 1	3301	10534735	2018	NA	Sun BB	public	1	Males and Females	0	29875488	European		NA	Protein	Immune system	NA
prot-a-1089	Fibroblast growth factor 16	3301	10534735	2018	NA	Sun BB	public	1	Males and Females	0	29875488	European		NA	Protein	Immune system	NA
prot-a-109	Annexin A2	3301	10534735	2018	NA	Sun BB	public	1	Males and Females	0	29875488	European		NA	Protein	Immune system	NA
prot-a-1091	Fibroblast growth factor 19	3301	10534735	2018	NA	Sun BB	public	1	Males and Females	0	29875488	European		NA	Protein	Immune system	NA
prot-a-1097	Fibroblast growth factor 7	3301	10534735	2018	NA	Sun BB	public	1	Males and Females	0	29875488	European		NA	Protein	Immune system	NA
prot-a-1099	Fibroblast growth factor 8 isoform B	3301	10534735	2018	NA	Sun BB	public	1	Males and Females	0	29875488	European		NA	Protein	Immune system	NA
prot-a-11	Acetyl-CoA carboxylase 2	3301	10534735	2018	NA	Sun BB	public	1	Males and Females	0	29875488	European		NA	Protein	Immune system	NA
prot-a-110	Annexin A9	3301	10534735	2018	NA	Sun BB	public	1	Males and Females	0	29875488	European		NA	Protein	Immune system	NA
prot-a-1100	Fibroblast growth factor 8 isoform A	3301	10534735	2018	NA	Sun BB	public	1	Males and Females	0	29875488	European		NA	Protein	Immune system	NA
prot-a-1102	Fibroblast growth factor receptor 2	3301	10534735	2018	NA	Sun BB	public	1	Males and Females	0	29875488	European		NA	Protein	Immune system	NA
prot-a-1103	Fibroblast growth factor receptor 3	3301	10534735	2018	NA	Sun BB	public	1	Males and Females	0	29875488	European		NA	Protein	Immune system	NA
prot-a-1107	Bis(5'-adenosyl)-triphosphatase	3301	10534735	2018	NA	Sun BB	public	1	Males and Females	0	29875488	European		NA	Protein	Immune system	NA
prot-a-1108	Fibrinogen C domain-containing protein 1	3301	10534735	2018	NA	Sun BB	public	1	Males and Females	0	29875488	European		NA	Protein	Immune system	NA
prot-a-1110	Vascular endothelial growth factor D	3301	10534735	2018	NA	Sun BB	public	1	Males and Females	0	29875488	European		NA	Protein	Immune system	NA
prot-a-1112	Four-jointed box protein 1	3301	10534735	2018	NA	Sun BB	public	1	Males and Females	0	29875488	European		NA	Protein	Immune system	NA
prot-a-1114	Peptidyl-prolyl cis-trans isomerase FKBP2	3301	10534735	2018	NA	Sun BB	public	1	Males and Females	0	29875488	European		NA	Protein	Immune system	NA
prot-a-1115	Inactive peptidyl-prolyl cis-trans isomerase FKBP6	3301	10534735	2018	NA	Sun BB	public	1	Males and Females	0	29875488	European		NA	Protein	Immune system	NA
prot-a-1116	Peptidyl-prolyl cis-trans isomerase FKBP7	3301	10534735	2018	NA	Sun BB	public	1	Males and Females	0	29875488	European		NA	Protein	Immune system	NA
prot-a-1117	Filamin-A	3301	10534735	2018	NA	Sun BB	public	1	Males and Females	0	29875488	European		NA	Protein	Immune system	NA
prot-a-1118	Filamin-A	3301	10534735	2018	NA	Sun BB	public	1	Males and Females	0	29875488	European		NA	Protein	Immune system	NA
prot-a-112	AP-4 complex subunit mu-1	3301	10534735	2018	NA	Sun BB	public	1	Males and Females	0	29875488	European		NA	Protein	Immune system	NA
prot-a-1123	Leucine-rich repeat transmembrane protein FLRT2	3301	10534735	2018	NA	Sun BB	public	1	Males and Females	0	29875488	European		NA	Protein	Immune system	NA
prot-a-1124	Leucine-rich repeat transmembrane protein FLRT3	3301	10534735	2018	NA	Sun BB	public	1	Males and Females	0	29875488	European		NA	Protein	Immune system	NA
prot-a-1126	Receptor-type tyrosine-protein kinase FLT3	3301	10534735	2018	NA	Sun BB	public	1	Males and Females	0	29875488	European		NA	Protein	Immune system	NA
prot-a-1129	Vascular endothelial growth factor receptor 3	3301	10534735	2018	NA	Sun BB	public	1	Males and Females	0	29875488	European		NA	Protein	Immune system	NA
prot-a-113	Apoptotic protease-activating factor 1	3301	10534735	2018	NA	Sun BB	public	1	Males and Females	0	29875488	European		NA	Protein	Immune system	NA
prot-a-1133	Fibronectin type III domain-containing protein 5	3301	10534735	2018	NA	Sun BB	public	1	Males and Females	0	29875488	European		NA	Protein	Immune system	NA
prot-a-1134	Glutamate carboxypeptidase 2	3301	10534735	2018	NA	Sun BB	public	1	Males and Females	0	29875488	European		NA	Protein	Immune system	NA
prot-a-1137	Forkhead box protein J2	3301	10534735	2018	NA	Sun BB	public	1	Males and Females	0	29875488	European		NA	Protein	Immune system	NA
prot-a-1139	Tyrosine-protein kinase FRK	3301	10534735	2018	NA	Sun BB	public	1	Males and Females	0	29875488	European		NA	Protein	Immune system	NA
prot-a-114	Amyloid beta A4 precursor protein-binding family B member 1	3301	10534735	2018	NA	Sun BB	public	1	Males and Females	0	29875488	European		NA	Protein	Immune system	NA
prot-a-1140	Secreted frizzled-related protein 3	3301	10534735	2018	NA	Sun BB	public	1	Males and Females	0	29875488	European		NA	Protein	Immune system	NA
prot-a-1141	Secreted frizzled-related protein 3	3301	10534735	2018	NA	Sun BB	public	1	Males and Females	0	29875488	European		NA	Protein	Immune system	NA
prot-a-1142	Follistatin	3301	10534735	2018	NA	Sun BB	public	1	Males and Females	0	29875488	European		NA	Protein	Immune system	NA
prot-a-1143	Follistatin-related protein 1	3301	10534735	2018	NA	Sun BB	public	1	Males and Females	0	29875488	European		NA	Protein	Immune system	NA
prot-a-1146	Follistatin-related protein 4	3301	10534735	2018	NA	Sun BB	public	1	Males and Females	0	29875488	European		NA	Protein	Immune system	NA
prot-a-1148	Ferritin	3301	10534735	2018	NA	Sun BB	public	1	Males and Females	0	29875488	European		NA	Protein	Immune system	NA
prot-a-1150	Furin	3301	10534735	2018	NA	Sun BB	public	1	Males and Females	0	29875488	European		NA	Protein	Immune system	NA
prot-a-1151	Alpha-(1,3)-fucosyltransferase 10	3301	10534735	2018	NA	Sun BB	public	1	Males and Females	0	29875488	European		NA	Protein	Immune system	NA
prot-a-1152	Galactoside 3(4)-L-fucosyltransferase	3301	10534735	2018	NA	Sun BB	public	1	Males and Females	0	29875488	European		NA	Protein	Immune system	NA
prot-a-1153	Alpha-(1,3)-fucosyltransferase 5	3301	10534735	2018	NA	Sun BB	public	1	Males and Females	0	29875488	European		NA	Protein	Immune system	NA
prot-a-1154	Alpha-(1,6)-fucosyltransferase	3301	10534735	2018	NA	Sun BB	public	1	Males and Females	0	29875488	European		NA	Protein	Immune system	NA
prot-a-1155	Alpha-(1,3)-fucosyltransferase 9	3301	10534735	2018	NA	Sun BB	public	1	Males and Females	0	29875488	European		NA	Protein	Immune system	NA
prot-a-1156	Fragile X mental retardation syndrome-related protein 1	3301	10534735	2018	NA	Sun BB	public	1	Males and Females	0	29875488	European		NA	Protein	Immune system	NA
prot-a-116	Amyloid beta A4 precursor protein-binding family B member 2	3301	10534735	2018	NA	Sun BB	public	1	Males and Females	0	29875488	European		NA	Protein	Immune system	NA
prot-a-1161	Gamma-aminobutyric acid receptor-associated protein-like 1	3301	10534735	2018	NA	Sun BB	public	1	Males and Females	0	29875488	European		NA	Protein	Immune system	NA
prot-a-1162	Gamma-aminobutyric acid receptor-associated protein-like 2	3301	10534735	2018	NA	Sun BB	public	1	Males and Females	0	29875488	European		NA	Protein	Immune system	NA
prot-a-1163	Gamma-aminobutyric acid type B receptor subunit 2	3301	10534735	2018	NA	Sun BB	public	1	Males and Females	0	29875488	European		NA	Protein	Immune system	NA
prot-a-1166	Galanin peptides	3301	10534735	2018	NA	Sun BB	public	1	Males and Females	0	29875488	European		NA	Protein	Immune system	NA
prot-a-1169	Polypeptide N-acetylgalactosaminyltransferase 16	3301	10534735	2018	NA	Sun BB	public	1	Males and Females	0	29875488	European		NA	Protein	Immune system	NA
prot-a-117	Amyloid beta A4 precursor protein-binding family B member 2	3301	10534735	2018	NA	Sun BB	public	1	Males and Females	0	29875488	European		NA	Protein	Immune system	NA
prot-a-1170	Polypeptide N-acetylgalactosaminyltransferase 1	3301	10534735	2018	NA	Sun BB	public	1	Males and Females	0	29875488	European		NA	Protein	Immune system	NA
prot-a-1174	Galanin-like peptide	3301	10534735	2018	NA	Sun BB	public	1	Males and Females	0	29875488	European		NA	Protein	Immune system	NA
prot-a-1178	Guanylate-binding protein 6	3301	10534735	2018	NA	Sun BB	public	1	Males and Females	0	29875488	European		NA	Protein	Immune system	NA
prot-a-1179	Vitamin D-binding protein	3301	10534735	2018	NA	Sun BB	public	1	Males and Females	0	29875488	European		NA	Protein	Immune system	NA
prot-a-1180	Grancalcin	3301	10534735	2018	NA	Sun BB	public	1	Males and Females	0	29875488	European		NA	Protein	Immune system	NA
prot-a-1181	Glucagon	3301	10534735	2018	NA	Sun BB	public	1	Males and Females	0	29875488	European		NA	Protein	Immune system	NA
prot-a-1183	Glucokinase	3301	10534735	2018	NA	Sun BB	public	1	Males and Females	0	29875488	European		NA	Protein	Immune system	NA
prot-a-1184	Glucokinase regulatory protein	3301	10534735	2018	NA	Sun BB	public	1	Males and Females	0	29875488	European		NA	Protein	Immune system	NA
prot-a-1186	N-acetyllactosaminide beta-1,6-N-acetylglucosaminyl-transferase, isoform C	3301	10534735	2018	NA	Sun BB	public	1	Males and Females	0	29875488	European		NA	Protein	Immune system	NA
prot-a-1188	Beta-1,3-galactosyl-O-glycosyl-glycoprotein beta-1,6-N-acetylglucosaminyltransferase 4	3301	10534735	2018	NA	Sun BB	public	1	Males and Females	0	29875488	European		NA	Protein	Immune system	NA
prot-a-1193	Growth/differentiation factor 11	3301	10534735	2018	NA	Sun BB	public	1	Males and Females	0	29875488	European		NA	Protein	Immune system	NA
prot-a-1194	Growth/differentiation factor 11/8	3301	10534735	2018	NA	Sun BB	public	1	Males and Females	0	29875488	European		NA	Protein	Immune system	NA
prot-a-1195	Growth/differentiation factor 15	3301	10534735	2018	NA	Sun BB	public	1	Males and Females	0	29875488	European		NA	Protein	Immune system	NA
prot-a-1196	Growth/differentiation factor 5	3301	10534735	2018	NA	Sun BB	public	1	Males and Females	0	29875488	European		NA	Protein	Immune system	NA
prot-a-1199	GTP-binding protein GEM	3301	10534735	2018	NA	Sun BB	public	1	Males and Females	0	29875488	European		NA	Protein	Immune system	NA
prot-a-120	Serum amyloid P-component	3301	10534735	2018	NA	Sun BB	public	1	Males and Females	0	29875488	European		NA	Protein	Immune system	NA
prot-a-1204	GDNF family receptor alpha-like	3301	10534735	2018	NA	Sun BB	public	1	Males and Females	0	29875488	European		NA	Protein	Immune system	NA
prot-a-1205	ADP-ribosylation factor-binding protein GGA1	3301	10534735	2018	NA	Sun BB	public	1	Males and Females	0	29875488	European		NA	Protein	Immune system	NA
prot-a-1206	ADP-ribosylation factor-binding protein GGA3	3301	10534735	2018	NA	Sun BB	public	1	Males and Females	0	29875488	European		NA	Protein	Immune system	NA
prot-a-1207	Gamma-glutamyl hydrolase	3301	10534735	2018	NA	Sun BB	public	1	Males and Females	0	29875488	European		NA	Protein	Immune system	NA
prot-a-121	DNA-(apurinic or apyrimidinic site) lyase	3301	10534735	2018	NA	Sun BB	public	1	Males and Females	0	29875488	European		NA	Protein	Immune system	NA
prot-a-1211	Growth hormone receptor	3301	10534735	2018	NA	Sun BB	public	1	Males and Females	0	29875488	European		NA	Protein	Immune system	NA
prot-a-1213	Gap junction alpha-1 protein	3301	10534735	2018	NA	Sun BB	public	1	Males and Females	0	29875488	European		NA	Protein	Immune system	NA
prot-a-1216	D-glucuronyl C5-epimerase	3301	10534735	2018	NA	Sun BB	public	1	Males and Females	0	29875488	European		NA	Protein	Immune system	NA
prot-a-122	Amyloid-like protein 2	3301	10534735	2018	NA	Sun BB	public	1	Males and Females	0	29875488	European		NA	Protein	Immune system	NA
prot-a-1220	Glutaredoxin-2, mitochondrial	3301	10534735	2018	NA	Sun BB	public	1	Males and Females	0	29875488	European		NA	Protein	Immune system	NA
prot-a-1223	Glycolipid transfer protein domain-containing protein 2	3301	10534735	2018	NA	Sun BB	public	1	Males and Females	0	29875488	European		NA	Protein	Immune system	NA
prot-a-1225	Glia maturation factor gamma	3301	10534735	2018	NA	Sun BB	public	1	Males and Females	0	29875488	European		NA	Protein	Immune system	NA
prot-a-1226	Guanine nucleotide-binding protein G(k) subunit alpha	3301	10534735	2018	NA	Sun BB	public	1	Males and Females	0	29875488	European		NA	Protein	Immune system	NA
prot-a-1228	Granulysin	3301	10534735	2018	NA	Sun BB	public	1	Males and Females	0	29875488	European		NA	Protein	Immune system	NA
prot-a-1229	Glycine N-methyltransferase	3301	10534735	2018	NA	Sun BB	public	1	Males and Females	0	29875488	European		NA	Protein	Immune system	NA
prot-a-123	Amyloid-like protein 2	3301	10534735	2018	NA	Sun BB	public	1	Males and Females	0	29875488	European		NA	Protein	Immune system	NA
prot-a-1230	Glucosamine-6-phosphate isomerase 1	3301	10534735	2018	NA	Sun BB	public	1	Males and Females	0	29875488	European		NA	Protein	Immune system	NA
prot-a-1231	Glucosamine 6-phosphate N-acetyltransferase	3301	10534735	2018	NA	Sun BB	public	1	Males and Females	0	29875488	European		NA	Protein	Immune system	NA
prot-a-1232	N-acetylglucosamine-1-phosphotransferase subunit gamma	3301	10534735	2018	NA	Sun BB	public	1	Males and Females	0	29875488	European		NA	Protein	Immune system	NA
prot-a-1233	Progonadoliberin-1	3301	10534735	2018	NA	Sun BB	public	1	Males and Females	0	29875488	European		NA	Protein	Immune system	NA
prot-a-1234	Progonadoliberin-2	3301	10534735	2018	NA	Sun BB	public	1	Males and Females	0	29875488	European		NA	Protein	Immune system	NA
prot-a-1238	Golgi membrane protein 1	3301	10534735	2018	NA	Sun BB	public	1	Males and Females	0	29875488	European		NA	Protein	Immune system	NA
prot-a-124	Adipocyte plasma membrane-associated protein	3301	10534735	2018	NA	Sun BB	public	1	Males and Females	0	29875488	European		NA	Protein	Immune system	NA
prot-a-1240	Golgi SNAP receptor complex member 1	3301	10534735	2018	NA	Sun BB	public	1	Males and Females	0	29875488	European		NA	Protein	Immune system	NA
prot-a-1241	Aspartate aminotransferase, cytoplasmic	3301	10534735	2018	NA	Sun BB	public	1	Males and Females	0	29875488	European		NA	Protein	Immune system	NA
prot-a-1242	Platelet glycoprotein Ib alpha chain	3301	10534735	2018	NA	Sun BB	public	1	Males and Females	0	29875488	European		NA	Protein	Immune system	NA
prot-a-1243	Platelet glycoprotein V	3301	10534735	2018	NA	Sun BB	public	1	Males and Females	0	29875488	European		NA	Protein	Immune system	NA
prot-a-1245	Glypican-1	3301	10534735	2018	NA	Sun BB	public	1	Males and Females	0	29875488	European		NA	Protein	Immune system	NA
prot-a-1246	Glypican-3	3301	10534735	2018	NA	Sun BB	public	1	Males and Females	0	29875488	European		NA	Protein	Immune system	NA
prot-a-1247	Glypican-5	3301	10534735	2018	NA	Sun BB	public	1	Males and Females	0	29875488	European		NA	Protein	Immune system	NA
prot-a-1248	Glypican-6	3301	10534735	2018	NA	Sun BB	public	1	Males and Females	0	29875488	European		NA	Protein	Immune system	NA
prot-a-1249	Glycerophosphocholine phosphodiesterase GPCPD1	3301	10534735	2018	NA	Sun BB	public	1	Males and Females	0	29875488	European		NA	Protein	Immune system	NA
prot-a-1250	Glycerol-3-phosphate dehydrogenase 1-like protein	3301	10534735	2018	NA	Sun BB	public	1	Males and Females	0	29875488	European		NA	Protein	Immune system	NA
prot-a-1251	Glycoprotein hormone alpha-2	3301	10534735	2018	NA	Sun BB	public	1	Males and Females	0	29875488	European		NA	Protein	Immune system	NA
prot-a-1252	Glucose-6-phosphate isomerase	3301	10534735	2018	NA	Sun BB	public	1	Males and Females	0	29875488	European		NA	Protein	Immune system	NA
prot-a-1253	Phosphatidylinositol-glycan-specific phospholipase D	3301	10534735	2018	NA	Sun BB	public	1	Males and Females	0	29875488	European		NA	Protein	Immune system	NA
prot-a-1255	Transmembrane glycoprotein NMB	3301	10534735	2018	NA	Sun BB	public	1	Males and Females	0	29875488	European		NA	Protein	Immune system	NA
prot-a-1256	Transmembrane glycoprotein NMB	3301	10534735	2018	NA	Sun BB	public	1	Males and Females	0	29875488	European		NA	Protein	Immune system	NA
prot-a-1257	Transmembrane glycoprotein NMB	3301	10534735	2018	NA	Sun BB	public	1	Males and Females	0	29875488	European		NA	Protein	Immune system	NA
prot-a-1258	Transmembrane glycoprotein NMB	3301	10534735	2018	NA	Sun BB	public	1	Males and Females	0	29875488	European		NA	Protein	Immune system	NA
prot-a-126	Apolipoprotein A-V	3301	10534735	2018	NA	Sun BB	public	1	Males and Females	0	29875488	European		NA	Protein	Immune system	NA
prot-a-1262	Probable G-protein coupled receptor 135	3301	10534735	2018	NA	Sun BB	public	1	Males and Females	0	29875488	European		NA	Protein	Immune system	NA
prot-a-1265	Glutathione peroxidase 7	3301	10534735	2018	NA	Sun BB	public	1	Males and Females	0	29875488	European		NA	Protein	Immune system	NA
prot-a-1266	GRAM domain-containing protein 1C	3301	10534735	2018	NA	Sun BB	public	1	Males and Females	0	29875488	European		NA	Protein	Immune system	NA
prot-a-1267	GRAM domain-containing protein 1C	3301	10534735	2018	NA	Sun BB	public	1	Males and Females	0	29875488	European		NA	Protein	Immune system	NA
prot-a-1270	Growth factor receptor-bound protein 14	3301	10534735	2018	NA	Sun BB	public	1	Males and Females	0	29875488	European		NA	Protein	Immune system	NA
prot-a-1271	Growth factor receptor-bound protein 2	3301	10534735	2018	NA	Sun BB	public	1	Males and Females	0	29875488	European		NA	Protein	Immune system	NA
prot-a-1272	Growth factor receptor-bound protein 7	3301	10534735	2018	NA	Sun BB	public	1	Males and Females	0	29875488	European		NA	Protein	Immune system	NA
prot-a-1273	Gremlin-1	3301	10534735	2018	NA	Sun BB	public	1	Males and Females	0	29875488	European		NA	Protein	Immune system	NA
prot-a-1276	Glutamate receptor ionotropic, delta-2	3301	10534735	2018	NA	Sun BB	public	1	Males and Females	0	29875488	European		NA	Protein	Immune system	NA
prot-a-1277	Granulins	3301	10534735	2018	NA	Sun BB	public	1	Males and Females	0	29875488	European		NA	Protein	Immune system	NA
prot-a-1279	Gastrin-releasing peptide	3301	10534735	2018	NA	Sun BB	public	1	Males and Females	0	29875488	European		NA	Protein	Immune system	NA
prot-a-128	DNA dC->dU-editing enzyme APOBEC-3G	3301	10534735	2018	NA	Sun BB	public	1	Males and Females	0	29875488	European		NA	Protein	Immune system	NA
prot-a-1280	Gastrin-releasing peptide	3301	10534735	2018	NA	Sun BB	public	1	Males and Females	0	29875488	European		NA	Protein	Immune system	NA
prot-a-1282	GSK3-beta interaction protein	3301	10534735	2018	NA	Sun BB	public	1	Males and Females	0	29875488	European		NA	Protein	Immune system	NA
prot-a-1283	Glutathione S-transferase A1	3301	10534735	2018	NA	Sun BB	public	1	Males and Females	0	29875488	European		NA	Protein	Immune system	NA
prot-a-1285	Glutathione S-transferase A4	3301	10534735	2018	NA	Sun BB	public	1	Males and Females	0	29875488	European		NA	Protein	Immune system	NA
prot-a-1287	Glutathione S-transferase Mu 1	3301	10534735	2018	NA	Sun BB	public	1	Males and Females	0	29875488	European		NA	Protein	Immune system	NA
prot-a-1288	Glutathione S-transferase omega-1	3301	10534735	2018	NA	Sun BB	public	1	Males and Females	0	29875488	European		NA	Protein	Immune system	NA
prot-a-1289	Glutathione S-transferase P	3301	10534735	2018	NA	Sun BB	public	1	Males and Females	0	29875488	European		NA	Protein	Immune system	NA
prot-a-129	Apolipoprotein D	3301	10534735	2018	NA	Sun BB	public	1	Males and Females	0	29875488	European		NA	Protein	Immune system	NA
prot-a-1290	Glutathione S-transferase P	3301	10534735	2018	NA	Sun BB	public	1	Males and Females	0	29875488	European		NA	Protein	Immune system	NA
prot-a-1291	Glutathione S-transferase theta-2B	3301	10534735	2018	NA	Sun BB	public	1	Males and Females	0	29875488	European		NA	Protein	Immune system	NA
prot-a-1292	General transcription factor II-I	3301	10534735	2018	NA	Sun BB	public	1	Males and Females	0	29875488	European		NA	Protein	Immune system	NA
prot-a-1294	Guanylate cyclase activator 2B	3301	10534735	2018	NA	Sun BB	public	1	Males and Females	0	29875488	European		NA	Protein	Immune system	NA
prot-a-1295	Glucoside xylosyltransferase 1	3301	10534735	2018	NA	Sun BB	public	1	Males and Females	0	29875488	European		NA	Protein	Immune system	NA
prot-a-1297	Granzyme A	3301	10534735	2018	NA	Sun BB	public	1	Males and Females	0	29875488	European		NA	Protein	Immune system	NA
prot-a-1298	Granzyme B	3301	10534735	2018	NA	Sun BB	public	1	Males and Females	0	29875488	European		NA	Protein	Immune system	NA
prot-a-1299	Granzyme B	3301	10534735	2018	NA	Sun BB	public	1	Males and Females	0	29875488	European		NA	Protein	Immune system	NA
prot-a-13	Arf-GAP with coiled-coil, ANK repeat and PH domain-containing protein 2	3301	10534735	2018	NA	Sun BB	public	1	Males and Females	0	29875488	European		NA	Protein	Immune system	NA
prot-a-130	Apolipoprotein D	3301	10534735	2018	NA	Sun BB	public	1	Males and Females	0	29875488	European		NA	Protein	Immune system	NA
prot-a-1300	Granzyme H	3301	10534735	2018	NA	Sun BB	public	1	Males and Females	0	29875488	European		NA	Protein	Immune system	NA
prot-a-1301	Granzyme K	3301	10534735	2018	NA	Sun BB	public	1	Males and Females	0	29875488	European		NA	Protein	Immune system	NA
prot-a-1302	Granzyme M	3301	10534735	2018	NA	Sun BB	public	1	Males and Females	0	29875488	European		NA	Protein	Immune system	NA
prot-a-1305	GDH/6PGL endoplasmic bifunctional protein	3301	10534735	2018	NA	Sun BB	public	1	Males and Females	0	29875488	European		NA	Protein	Immune system	NA
prot-a-1306	3-hydroxyanthranilate 3,4-dioxygenase	3301	10534735	2018	NA	Sun BB	public	1	Males and Females	0	29875488	European		NA	Protein	Immune system	NA
prot-a-1308	Hyaluronan and proteoglycan link protein 1	3301	10534735	2018	NA	Sun BB	public	1	Males and Females	0	29875488	European		NA	Protein	Immune system	NA
prot-a-1310	Hepatitis A virus cellular receptor 1	3301	10534735	2018	NA	Sun BB	public	1	Males and Females	0	29875488	European		NA	Protein	Immune system	NA
prot-a-1312	Hepatitis A virus cellular receptor 2	3301	10534735	2018	NA	Sun BB	public	1	Males and Females	0	29875488	European		NA	Protein	Immune system	NA
prot-a-1313	Heparin-binding EGF-like growth factor	3301	10534735	2018	NA	Sun BB	public	1	Males and Females	0	29875488	European		NA	Protein	Immune system	NA
prot-a-1315	Hemoglobin subunit gamma-1	3301	10534735	2018	NA	Sun BB	public	1	Males and Females	0	29875488	European		NA	Protein	Immune system	NA
prot-a-1316	Hemoglobin subunit theta-1	3301	10534735	2018	NA	Sun BB	public	1	Males and Females	0	29875488	European		NA	Protein	Immune system	NA
prot-a-1317	Hemoglobin subunit zeta	3301	10534735	2018	NA	Sun BB	public	1	Males and Females	0	29875488	European		NA	Protein	Immune system	NA
prot-a-1318	Hydroxycarboxylic acid receptor 2	3301	10534735	2018	NA	Sun BB	public	1	Males and Females	0	29875488	European		NA	Protein	Immune system	NA
prot-a-1320	Histone deacetylase 8	3301	10534735	2018	NA	Sun BB	public	1	Males and Females	0	29875488	European		NA	Protein	Immune system	NA
prot-a-1322	Haloacid dehalogenase-like hydrolase domain-containing protein 2	3301	10534735	2018	NA	Sun BB	public	1	Males and Females	0	29875488	European		NA	Protein	Immune system	NA
prot-a-1323	Vigilin	3301	10534735	2018	NA	Sun BB	public	1	Males and Females	0	29875488	European		NA	Protein	Immune system	NA
prot-a-1326	HEPACAM family member 2	3301	10534735	2018	NA	Sun BB	public	1	Males and Females	0	29875488	European		NA	Protein	Immune system	NA
prot-a-1327	HEPACAM family member 2	3301	10534735	2018	NA	Sun BB	public	1	Males and Females	0	29875488	European		NA	Protein	Immune system	NA
prot-a-1329	Probable E3 ubiquitin-protein ligase HERC1	3301	10534735	2018	NA	Sun BB	public	1	Males and Females	0	29875488	European		NA	Protein	Immune system	NA
prot-a-1331	E3 ISG15--protein ligase HERC5	3301	10534735	2018	NA	Sun BB	public	1	Males and Females	0	29875488	European		NA	Protein	Immune system	NA
prot-a-1332	Hemojuvelin	3301	10534735	2018	NA	Sun BB	public	1	Males and Females	0	29875488	European		NA	Protein	Immune system	NA
prot-a-1334	Hepatocyte growth factor	3301	10534735	2018	NA	Sun BB	public	1	Males and Females	0	29875488	European		NA	Protein	Immune system	NA
prot-a-1338	Histidine triad nucleotide-binding protein 1	3301	10534735	2018	NA	Sun BB	public	1	Males and Females	0	29875488	European		NA	Protein	Immune system	NA
prot-a-134	Apolipoprotein L1	3301	10534735	2018	NA	Sun BB	public	1	Males and Females	0	29875488	European		NA	Protein	Immune system	NA
prot-a-1340	Homeodomain-interacting protein kinase 3	3301	10534735	2018	NA	Sun BB	public	1	Males and Females	0	29875488	European		NA	Protein	Immune system	NA
prot-a-1341	Histone H1.2	3301	10534735	2018	NA	Sun BB	public	1	Males and Females	0	29875488	European		NA	Protein	Immune system	NA
prot-a-1343	Hexokinase-1	3301	10534735	2018	NA	Sun BB	public	1	Males and Females	0	29875488	European		NA	Protein	Immune system	NA
prot-a-1344	Hexokinase-2	3301	10534735	2018	NA	Sun BB	public	1	Males and Females	0	29875488	European		NA	Protein	Immune system	NA
prot-a-1346	HLA class II histocompatibility antigen, DP beta 1 chain	3301	10534735	2018	NA	Sun BB	public	1	Males and Females	0	29875488	European		NA	Protein	Immune system	NA
prot-a-1347	HLA class II histocompatibility antigen, DQ alpha 2 chain	3301	10534735	2018	NA	Sun BB	public	1	Males and Females	0	29875488	European		NA	Protein	Immune system	NA
prot-a-135	Apolipoprotein L1	3301	10534735	2018	NA	Sun BB	public	1	Males and Females	0	29875488	European		NA	Protein	Immune system	NA
prot-a-1351	High mobility group protein B1	3301	10534735	2018	NA	Sun BB	public	1	Males and Females	0	29875488	European		NA	Protein	Immune system	NA
prot-a-1352	High mobility group protein B2	3301	10534735	2018	NA	Sun BB	public	1	Males and Females	0	29875488	European		NA	Protein	Immune system	NA
prot-a-1353	High mobility group protein B3	3301	10534735	2018	NA	Sun BB	public	1	Males and Females	0	29875488	European		NA	Protein	Immune system	NA
prot-a-1357	Non-histone chromosomal protein HMG-14	3301	10534735	2018	NA	Sun BB	public	1	Males and Females	0	29875488	European		NA	Protein	Immune system	NA
prot-a-136	Apolipoprotein M	3301	10534735	2018	NA	Sun BB	public	1	Males and Females	0	29875488	European		NA	Protein	Immune system	NA
prot-a-1360	Hepatocyte nuclear factor 4-alpha	3301	10534735	2018	NA	Sun BB	public	1	Males and Females	0	29875488	European		NA	Protein	Immune system	NA
prot-a-1361	Heterogeneous nuclear ribonucleoproteins A2/B1	3301	10534735	2018	NA	Sun BB	public	1	Males and Females	0	29875488	European		NA	Protein	Immune system	NA
prot-a-1362	Heterogeneous nuclear ribonucleoprotein A/B	3301	10534735	2018	NA	Sun BB	public	1	Males and Females	0	29875488	European		NA	Protein	Immune system	NA
prot-a-1363	Heterogeneous nuclear ribonucleoprotein A/B	3301	10534735	2018	NA	Sun BB	public	1	Males and Females	0	29875488	European		NA	Protein	Immune system	NA
prot-a-1364	Heterogeneous nuclear ribonucleoproteins C1/C2	3301	10534735	2018	NA	Sun BB	public	1	Males and Females	0	29875488	European		NA	Protein	Immune system	NA
prot-a-1365	Heterogeneous nuclear ribonucleoprotein D-like	3301	10534735	2018	NA	Sun BB	public	1	Males and Females	0	29875488	European		NA	Protein	Immune system	NA
prot-a-1367	Heterogeneous nuclear ribonucleoprotein M	3301	10534735	2018	NA	Sun BB	public	1	Males and Females	0	29875488	European		NA	Protein	Immune system	NA
prot-a-1369	Haptoglobin	3301	10534735	2018	NA	Sun BB	public	1	Males and Females	0	29875488	European		NA	Protein	Immune system	NA
prot-a-1370	15-hydroxyprostaglandin dehydrogenase [NAD(+)]	3301	10534735	2018	NA	Sun BB	public	1	Males and Females	0	29875488	European		NA	Protein	Immune system	NA
prot-a-1371	Hematopoietic prostaglandin D synthase	3301	10534735	2018	NA	Sun BB	public	1	Males and Females	0	29875488	European		NA	Protein	Immune system	NA
prot-a-1374	Ribonuclease UK114	3301	10534735	2018	NA	Sun BB	public	1	Males and Females	0	29875488	European		NA	Protein	Immune system	NA
prot-a-1376	Heparan sulfate glucosamine 3-O-sulfotransferase 3B1	3301	10534735	2018	NA	Sun BB	public	1	Males and Females	0	29875488	European		NA	Protein	Immune system	NA
prot-a-1378	Heparan-sulfate 6-O-sulfotransferase 1	3301	10534735	2018	NA	Sun BB	public	1	Males and Females	0	29875488	European		NA	Protein	Immune system	NA
prot-a-138	MICOS complex subunit MIC26	3301	10534735	2018	NA	Sun BB	public	1	Males and Females	0	29875488	European		NA	Protein	Immune system	NA
prot-a-1381	17-beta-hydroxysteroid dehydrogenase 14	3301	10534735	2018	NA	Sun BB	public	1	Males and Females	0	29875488	European		NA	Protein	Immune system	NA
prot-a-1386	Endoplasmin	3301	10534735	2018	NA	Sun BB	public	1	Males and Females	0	29875488	European		NA	Protein	Immune system	NA
prot-a-1387	Heat shock 70 kDa protein 1-like	3301	10534735	2018	NA	Sun BB	public	1	Males and Females	0	29875488	European		NA	Protein	Immune system	NA
prot-a-1388	Heat shock 70 kDa protein 6	3301	10534735	2018	NA	Sun BB	public	1	Males and Females	0	29875488	European		NA	Protein	Immune system	NA
prot-a-1389	Oxidoreductase HTATIP2	3301	10534735	2018	NA	Sun BB	public	1	Males and Females	0	29875488	European		NA	Protein	Immune system	NA
prot-a-1391	Histatin-1	3301	10534735	2018	NA	Sun BB	public	1	Males and Females	0	29875488	European		NA	Protein	Immune system	NA
prot-a-1393	Hyaluronidase-1	3301	10534735	2018	NA	Sun BB	public	1	Males and Females	0	29875488	European		NA	Protein	Immune system	NA
prot-a-1395	Bone sialoprotein 2	3301	10534735	2018	NA	Sun BB	public	1	Males and Females	0	29875488	European		NA	Protein	Immune system	NA
prot-a-1396	Bone sialoprotein 2	3301	10534735	2018	NA	Sun BB	public	1	Males and Females	0	29875488	European		NA	Protein	Immune system	NA
prot-a-1397	Intercellular adhesion molecule 1	3301	10534735	2018	NA	Sun BB	public	1	Males and Females	0	29875488	European		NA	Protein	Immune system	NA
prot-a-1398	Intercellular adhesion molecule 2	3301	10534735	2018	NA	Sun BB	public	1	Males and Females	0	29875488	European		NA	Protein	Immune system	NA
prot-a-14	Acyl-CoA-binding domain-containing protein 6	3301	10534735	2018	NA	Sun BB	public	1	Males and Females	0	29875488	European		NA	Protein	Immune system	NA
prot-a-1400	Intercellular adhesion molecule 4	3301	10534735	2018	NA	Sun BB	public	1	Males and Females	0	29875488	European		NA	Protein	Immune system	NA
prot-a-1401	Intercellular adhesion molecule 5	3301	10534735	2018	NA	Sun BB	public	1	Males and Females	0	29875488	European		NA	Protein	Immune system	NA
prot-a-1402	Intercellular adhesion molecule 5	3301	10534735	2018	NA	Sun BB	public	1	Males and Females	0	29875488	European		NA	Protein	Immune system	NA
prot-a-1403	Inducible T-cell costimulator	3301	10534735	2018	NA	Sun BB	public	1	Males and Females	0	29875488	European		NA	Protein	Immune system	NA
prot-a-1404	Inducible T-cell costimulator	3301	10534735	2018	NA	Sun BB	public	1	Males and Females	0	29875488	European		NA	Protein	Immune system	NA
prot-a-1405	ICOS ligand	3301	10534735	2018	NA	Sun BB	public	1	Males and Females	0	29875488	European		NA	Protein	Immune system	NA
prot-a-1406	ICOS ligand	3301	10534735	2018	NA	Sun BB	public	1	Males and Females	0	29875488	European		NA	Protein	Immune system	NA
prot-a-1407	DNA-binding protein inhibitor ID-1	3301	10534735	2018	NA	Sun BB	public	1	Males and Females	0	29875488	European		NA	Protein	Immune system	NA
prot-a-1408	DNA-binding protein inhibitor ID-2	3301	10534735	2018	NA	Sun BB	public	1	Males and Females	0	29875488	European		NA	Protein	Immune system	NA
prot-a-1410	Indoleamine 2,3-dioxygenase 1	3301	10534735	2018	NA	Sun BB	public	1	Males and Females	0	29875488	European		NA	Protein	Immune system	NA
prot-a-1411	Alpha-L-iduronidase	3301	10534735	2018	NA	Sun BB	public	1	Males and Females	0	29875488	European		NA	Protein	Immune system	NA
prot-a-1414	Gamma-interferon-inducible protein 16	3301	10534735	2018	NA	Sun BB	public	1	Males and Females	0	29875488	European		NA	Protein	Immune system	NA
prot-a-1416	Interferon-induced protein with tetratricopeptide repeats 2	3301	10534735	2018	NA	Sun BB	public	1	Males and Females	0	29875488	European		NA	Protein	Immune system	NA
prot-a-1417	Interferon-induced protein with tetratricopeptide repeats 3	3301	10534735	2018	NA	Sun BB	public	1	Males and Females	0	29875488	European		NA	Protein	Immune system	NA
prot-a-1418	Interferon alpha-10	3301	10534735	2018	NA	Sun BB	public	1	Males and Females	0	29875488	European		NA	Protein	Immune system	NA
prot-a-1420	Interferon alpha-14	3301	10534735	2018	NA	Sun BB	public	1	Males and Females	0	29875488	European		NA	Protein	Immune system	NA
prot-a-1422	Interferon alpha-5	3301	10534735	2018	NA	Sun BB	public	1	Males and Females	0	29875488	European		NA	Protein	Immune system	NA
prot-a-1428	Interferon gamma	3301	10534735	2018	NA	Sun BB	public	1	Males and Females	0	29875488	European		NA	Protein	Immune system	NA
prot-a-143	ADP-ribosylation factor 6	3301	10534735	2018	NA	Sun BB	public	1	Males and Females	0	29875488	European		NA	Protein	Immune system	NA
prot-a-1430	Interferon gamma receptor 1	3301	10534735	2018	NA	Sun BB	public	1	Males and Females	0	29875488	European		NA	Protein	Immune system	NA
prot-a-1432	Interferon gamma receptor 2	3301	10534735	2018	NA	Sun BB	public	1	Males and Females	0	29875488	European		NA	Protein	Immune system	NA
prot-a-1436	Interferon lambda-2	3301	10534735	2018	NA	Sun BB	public	1	Males and Females	0	29875488	European		NA	Protein	Immune system	NA
prot-a-1439	Immunoglobulin-binding protein 1	3301	10534735	2018	NA	Sun BB	public	1	Males and Females	0	29875488	European		NA	Protein	Immune system	NA
prot-a-144	ADP-ribosylation factor GTPase-activating protein 2	3301	10534735	2018	NA	Sun BB	public	1	Males and Females	0	29875488	European		NA	Protein	Immune system	NA
prot-a-1440	Immunoglobulin superfamily DCC subclass member 3	3301	10534735	2018	NA	Sun BB	public	1	Males and Females	0	29875488	European		NA	Protein	Immune system	NA
prot-a-1442	Immunoglobulin superfamily DCC subclass member 4	3301	10534735	2018	NA	Sun BB	public	1	Males and Females	0	29875488	European		NA	Protein	Immune system	NA
prot-a-1443	Insulin-like growth factor I	3301	10534735	2018	NA	Sun BB	public	1	Males and Females	0	29875488	European		NA	Protein	Immune system	NA
prot-a-1444	Insulin-like growth factor 1 receptor	3301	10534735	2018	NA	Sun BB	public	1	Males and Females	0	29875488	European		NA	Protein	Immune system	NA
prot-a-1445	Cation-independent mannose-6-phosphate receptor	3301	10534735	2018	NA	Sun BB	public	1	Males and Females	0	29875488	European		NA	Protein	Immune system	NA
prot-a-145	Arfaptin-1	3301	10534735	2018	NA	Sun BB	public	1	Males and Females	0	29875488	European		NA	Protein	Immune system	NA
prot-a-1451	Insulin-like growth factor-binding protein 7	3301	10534735	2018	NA	Sun BB	public	1	Males and Females	0	29875488	European		NA	Protein	Immune system	NA
prot-a-1453	Insulin growth factor-like family member 3	3301	10534735	2018	NA	Sun BB	public	1	Males and Females	0	29875488	European		NA	Protein	Immune system	NA
prot-a-1454	Insulin growth factor-like family member 4	3301	10534735	2018	NA	Sun BB	public	1	Males and Females	0	29875488	European		NA	Protein	Immune system	NA
prot-a-1455	IGF-like family receptor 1	3301	10534735	2018	NA	Sun BB	public	1	Males and Females	0	29875488	European		NA	Protein	Immune system	NA
prot-a-1458	Immunoglobulin lambda-like polypeptide 1	3301	10534735	2018	NA	Sun BB	public	1	Males and Females	0	29875488	European		NA	Protein	Immune system	NA
prot-a-1459	IgLON family member 5	3301	10534735	2018	NA	Sun BB	public	1	Males and Females	0	29875488	European		NA	Protein	Immune system	NA
prot-a-146	Arfaptin-2	3301	10534735	2018	NA	Sun BB	public	1	Males and Females	0	29875488	European		NA	Protein	Immune system	NA
prot-a-1464	Interleukin-10	3301	10534735	2018	NA	Sun BB	public	1	Males and Females	0	29875488	European		NA	Protein	Immune system	NA
prot-a-1465	Interleukin-10 receptor subunit beta	3301	10534735	2018	NA	Sun BB	public	1	Males and Females	0	29875488	European		NA	Protein	Immune system	NA
prot-a-1467	Interleukin-11 receptor subunit alpha	3301	10534735	2018	NA	Sun BB	public	1	Males and Females	0	29875488	European		NA	Protein	Immune system	NA
prot-a-1468	Interleukin-12	3301	10534735	2018	NA	Sun BB	public	1	Males and Females	0	29875488	European		NA	Protein	Immune system	NA
prot-a-1471	Interleukin-23	3301	10534735	2018	NA	Sun BB	public	1	Males and Females	0	29875488	European		NA	Protein	Immune system	NA
prot-a-1473	Interleukin-12 receptor subunit beta-1	3301	10534735	2018	NA	Sun BB	public	1	Males and Females	0	29875488	European		NA	Protein	Immune system	NA
prot-a-1474	Interleukin-12 receptor subunit beta-2	3301	10534735	2018	NA	Sun BB	public	1	Males and Females	0	29875488	European		NA	Protein	Immune system	NA
prot-a-1476	Interleukin-13 receptor subunit alpha-1	3301	10534735	2018	NA	Sun BB	public	1	Males and Females	0	29875488	European		NA	Protein	Immune system	NA
prot-a-1477	Interleukin-15 receptor subunit alpha	3301	10534735	2018	NA	Sun BB	public	1	Males and Females	0	29875488	European		NA	Protein	Immune system	NA
prot-a-1478	Interleukin-15 receptor subunit alpha	3301	10534735	2018	NA	Sun BB	public	1	Males and Females	0	29875488	European		NA	Protein	Immune system	NA
prot-a-1479	Interleukin-16	3301	10534735	2018	NA	Sun BB	public	1	Males and Females	0	29875488	European		NA	Protein	Immune system	NA
prot-a-148	Rho GTPase-activating protein 25	3301	10534735	2018	NA	Sun BB	public	1	Males and Females	0	29875488	European		NA	Protein	Immune system	NA
prot-a-1482	Interleukin-17A	3301	10534735	2018	NA	Sun BB	public	1	Males and Females	0	29875488	European		NA	Protein	Immune system	NA
prot-a-1486	Interleukin-17 receptor A	3301	10534735	2018	NA	Sun BB	public	1	Males and Females	0	29875488	European		NA	Protein	Immune system	NA
prot-a-1487	Interleukin-17 receptor B	3301	10534735	2018	NA	Sun BB	public	1	Males and Females	0	29875488	European		NA	Protein	Immune system	NA
prot-a-1489	Interleukin-17 receptor D	3301	10534735	2018	NA	Sun BB	public	1	Males and Females	0	29875488	European		NA	Protein	Immune system	NA
prot-a-149	Rho GTPase-activating protein 30	3301	10534735	2018	NA	Sun BB	public	1	Males and Females	0	29875488	European		NA	Protein	Immune system	NA
prot-a-1491	Interleukin-18 receptor 1	3301	10534735	2018	NA	Sun BB	public	1	Males and Females	0	29875488	European		NA	Protein	Immune system	NA
prot-a-1492	Interleukin-18 receptor 1	3301	10534735	2018	NA	Sun BB	public	1	Males and Females	0	29875488	European		NA	Protein	Immune system	NA
prot-a-1493	Interleukin-19	3301	10534735	2018	NA	Sun BB	public	1	Males and Females	0	29875488	European		NA	Protein	Immune system	NA
prot-a-1495	Interleukin-1 beta	3301	10534735	2018	NA	Sun BB	public	1	Males and Females	0	29875488	European		NA	Protein	Immune system	NA
prot-a-1497	Interleukin-1 receptor type 2	3301	10534735	2018	NA	Sun BB	public	1	Males and Females	0	29875488	European		NA	Protein	Immune system	NA
prot-a-1499	Interleukin-1 Receptor accessory protein	3301	10534735	2018	NA	Sun BB	public	1	Males and Females	0	29875488	European		NA	Protein	Immune system	NA
prot-a-1500	Interleukin-1 Receptor accessory protein	3301	10534735	2018	NA	Sun BB	public	1	Males and Females	0	29875488	European		NA	Protein	Immune system	NA
prot-a-1502	Interleukin-1 receptor-like 1	3301	10534735	2018	NA	Sun BB	public	1	Males and Females	0	29875488	European		NA	Protein	Immune system	NA
prot-a-1503	Interleukin-1 receptor-like 2	3301	10534735	2018	NA	Sun BB	public	1	Males and Females	0	29875488	European		NA	Protein	Immune system	NA
prot-a-1504	Interleukin-1 receptor antagonist protein	3301	10534735	2018	NA	Sun BB	public	1	Males and Females	0	29875488	European		NA	Protein	Immune system	NA
prot-a-1506	Interleukin-21	3301	10534735	2018	NA	Sun BB	public	1	Males and Females	0	29875488	European		NA	Protein	Immune system	NA
prot-a-1507	Interleukin-22	3301	10534735	2018	NA	Sun BB	public	1	Males and Females	0	29875488	European		NA	Protein	Immune system	NA
prot-a-1510	Interleukin-22 receptor subunit alpha-2	3301	10534735	2018	NA	Sun BB	public	1	Males and Females	0	29875488	European		NA	Protein	Immune system	NA
prot-a-1511	Interleukin-22 receptor subunit alpha-2	3301	10534735	2018	NA	Sun BB	public	1	Males and Females	0	29875488	European		NA	Protein	Immune system	NA
prot-a-1512	Interleukin-2	3301	10534735	2018	NA	Sun BB	public	1	Males and Females	0	29875488	European		NA	Protein	Immune system	NA
prot-a-1513	Interleukin-23 receptor	3301	10534735	2018	NA	Sun BB	public	1	Males and Females	0	29875488	European		NA	Protein	Immune system	NA
prot-a-1515	Interleukin-25	3301	10534735	2018	NA	Sun BB	public	1	Males and Females	0	29875488	European		NA	Protein	Immune system	NA
prot-a-1516	Interleukin-27	3301	10534735	2018	NA	Sun BB	public	1	Males and Females	0	29875488	European		NA	Protein	Immune system	NA
prot-a-1517	Interleukin-27 receptor subunit alpha	3301	10534735	2018	NA	Sun BB	public	1	Males and Females	0	29875488	European		NA	Protein	Immune system	NA
prot-a-1519	Interleukin-2 receptor subunit beta	3301	10534735	2018	NA	Sun BB	public	1	Males and Females	0	29875488	European		NA	Protein	Immune system	NA
prot-a-152	Rho GDP-dissociation inhibitor 1	3301	10534735	2018	NA	Sun BB	public	1	Males and Females	0	29875488	European		NA	Protein	Immune system	NA
prot-a-1521	Interleukin-31	3301	10534735	2018	NA	Sun BB	public	1	Males and Females	0	29875488	European		NA	Protein	Immune system	NA
prot-a-1524	Interleukin-34	3301	10534735	2018	NA	Sun BB	public	1	Males and Females	0	29875488	European		NA	Protein	Immune system	NA
prot-a-1525	Interleukin-3	3301	10534735	2018	NA	Sun BB	public	1	Males and Females	0	29875488	European		NA	Protein	Immune system	NA
prot-a-1526	Interleukin-36 alpha	3301	10534735	2018	NA	Sun BB	public	1	Males and Females	0	29875488	European		NA	Protein	Immune system	NA
prot-a-1529	Interleukin-37	3301	10534735	2018	NA	Sun BB	public	1	Males and Females	0	29875488	European		NA	Protein	Immune system	NA
prot-a-153	Rho GDP-dissociation inhibitor 2	3301	10534735	2018	NA	Sun BB	public	1	Males and Females	0	29875488	European		NA	Protein	Immune system	NA
prot-a-1530	Interleukin-3 receptor subunit alpha	3301	10534735	2018	NA	Sun BB	public	1	Males and Females	0	29875488	European		NA	Protein	Immune system	NA
prot-a-1531	Interleukin-3 receptor subunit alpha	3301	10534735	2018	NA	Sun BB	public	1	Males and Females	0	29875488	European		NA	Protein	Immune system	NA
prot-a-1535	Interleukin-5	3301	10534735	2018	NA	Sun BB	public	1	Males and Females	0	29875488	European		NA	Protein	Immune system	NA
prot-a-1536	Interleukin-5 receptor subunit alpha	3301	10534735	2018	NA	Sun BB	public	1	Males and Females	0	29875488	European		NA	Protein	Immune system	NA
prot-a-1537	Interleukin-5 receptor subunit alpha	3301	10534735	2018	NA	Sun BB	public	1	Males and Females	0	29875488	European		NA	Protein	Immune system	NA
prot-a-1539	Interleukin-6	3301	10534735	2018	NA	Sun BB	public	1	Males and Females	0	29875488	European		NA	Protein	Immune system	NA
prot-a-154	Rho guanine nucleotide exchange factor 10	3301	10534735	2018	NA	Sun BB	public	1	Males and Females	0	29875488	European		NA	Protein	Immune system	NA
prot-a-1540	Interleukin-6 receptor subunit alpha	3301	10534735	2018	NA	Sun BB	public	1	Males and Females	0	29875488	European		NA	Protein	Immune system	NA
prot-a-1541	Interleukin-6 receptor subunit alpha	3301	10534735	2018	NA	Sun BB	public	1	Males and Females	0	29875488	European		NA	Protein	Immune system	NA
prot-a-1542	Interleukin-6 receptor subunit beta	3301	10534735	2018	NA	Sun BB	public	1	Males and Females	0	29875488	European		NA	Protein	Immune system	NA
prot-a-1543	Interleukin-7	3301	10534735	2018	NA	Sun BB	public	1	Males and Females	0	29875488	European		NA	Protein	Immune system	NA
prot-a-1544	Interleukin-7 receptor subunit alpha	3301	10534735	2018	NA	Sun BB	public	1	Males and Females	0	29875488	European		NA	Protein	Immune system	NA
prot-a-155	Rho guanine nucleotide exchange factor 1	3301	10534735	2018	NA	Sun BB	public	1	Males and Females	0	29875488	European		NA	Protein	Immune system	NA
prot-a-1550	Inosine-5'-monophosphate dehydrogenase 2	3301	10534735	2018	NA	Sun BB	public	1	Males and Females	0	29875488	European		NA	Protein	Immune system	NA
prot-a-1552	Inhibitor of growth protein 1	3301	10534735	2018	NA	Sun BB	public	1	Males and Females	0	29875488	European		NA	Protein	Immune system	NA
prot-a-1556	Inhibin beta C chain	3301	10534735	2018	NA	Sun BB	public	1	Males and Females	0	29875488	European		NA	Protein	Immune system	NA
prot-a-1560	Insulin-like 3	3301	10534735	2018	NA	Sun BB	public	1	Males and Females	0	29875488	European		NA	Protein	Immune system	NA
prot-a-1568	Interferon regulatory factor 2	3301	10534735	2018	NA	Sun BB	public	1	Males and Females	0	29875488	European		NA	Protein	Immune system	NA
prot-a-157	Rho guanine nucleotide exchange factor 25	3301	10534735	2018	NA	Sun BB	public	1	Males and Females	0	29875488	European		NA	Protein	Immune system	NA
prot-a-1570	Interferon regulatory factor 6	3301	10534735	2018	NA	Sun BB	public	1	Males and Females	0	29875488	European		NA	Protein	Immune system	NA
prot-a-1573	Ubiquitin-like protein ISG15	3301	10534735	2018	NA	Sun BB	public	1	Males and Females	0	29875488	European		NA	Protein	Immune system	NA
prot-a-1574	Ubiquitin-like protein ISG15	3301	10534735	2018	NA	Sun BB	public	1	Males and Females	0	29875488	European		NA	Protein	Immune system	NA
prot-a-1576	Immunoglobulin superfamily containing leucine-rich repeat protein 2	3301	10534735	2018	NA	Sun BB	public	1	Males and Females	0	29875488	European		NA	Protein	Immune system	NA
prot-a-1577	Isthmin-1	3301	10534735	2018	NA	Sun BB	public	1	Males and Females	0	29875488	European		NA	Protein	Immune system	NA
prot-a-1579	IST1 homolog	3301	10534735	2018	NA	Sun BB	public	1	Males and Females	0	29875488	European		NA	Protein	Immune system	NA
prot-a-158	Rho guanine nucleotide exchange factor 7	3301	10534735	2018	NA	Sun BB	public	1	Males and Females	0	29875488	European		NA	Protein	Immune system	NA
prot-a-1582	Integrin alpha-5	3301	10534735	2018	NA	Sun BB	public	1	Males and Females	0	29875488	European		NA	Protein	Immune system	NA
prot-a-1583	Integrin alpha-L	3301	10534735	2018	NA	Sun BB	public	1	Males and Females	0	29875488	European		NA	Protein	Immune system	NA
prot-a-1586	Inter-alpha-trypsin inhibitor heavy chain H1	3301	10534735	2018	NA	Sun BB	public	1	Males and Females	0	29875488	European		NA	Protein	Immune system	NA
prot-a-1587	Inter-alpha-trypsin inhibitor heavy chain H5	3301	10534735	2018	NA	Sun BB	public	1	Males and Females	0	29875488	European		NA	Protein	Immune system	NA
prot-a-159	AT-rich interactive domain-containing protein 3A	3301	10534735	2018	NA	Sun BB	public	1	Males and Females	0	29875488	European		NA	Protein	Immune system	NA
prot-a-1594	Inositol 1,4,5-trisphosphate receptor-interacting protein-like 1	3301	10534735	2018	NA	Sun BB	public	1	Males and Females	0	29875488	European		NA	Protein	Immune system	NA
prot-a-1595	Intersectin-1	3301	10534735	2018	NA	Sun BB	public	1	Males and Females	0	29875488	European		NA	Protein	Immune system	NA
prot-a-1596	Protein jagged-1	3301	10534735	2018	NA	Sun BB	public	1	Males and Females	0	29875488	European		NA	Protein	Immune system	NA
prot-a-1597	Protein jagged-2	3301	10534735	2018	NA	Sun BB	public	1	Males and Females	0	29875488	European		NA	Protein	Immune system	NA
prot-a-1598	Tyrosine-protein kinase JAK2	3301	10534735	2018	NA	Sun BB	public	1	Males and Females	0	29875488	European		NA	Protein	Immune system	NA
prot-a-1599	Janus kinase and microtubule-interacting protein 3	3301	10534735	2018	NA	Sun BB	public	1	Males and Females	0	29875488	European		NA	Protein	Immune system	NA
prot-a-160	ADP-ribosylation factor-like protein 11	3301	10534735	2018	NA	Sun BB	public	1	Males and Females	0	29875488	European		NA	Protein	Immune system	NA
prot-a-1600	Junctional adhesion molecule B	3301	10534735	2018	NA	Sun BB	public	1	Males and Females	0	29875488	European		NA	Protein	Immune system	NA
prot-a-1606	Anosmin-1	3301	10534735	2018	NA	Sun BB	public	1	Males and Females	0	29875488	European		NA	Protein	Immune system	NA
prot-a-1607	Histone acetyltransferase KAT6A	3301	10534735	2018	NA	Sun BB	public	1	Males and Females	0	29875488	European		NA	Protein	Immune system	NA
prot-a-161	ADP-ribosylation factor-like protein 1	3301	10534735	2018	NA	Sun BB	public	1	Males and Females	0	29875488	European		NA	Protein	Immune system	NA
prot-a-1610	Potassium voltage-gated channel subfamily E member 2	3301	10534735	2018	NA	Sun BB	public	1	Males and Females	0	29875488	European		NA	Protein	Immune system	NA
prot-a-1612	Potassium voltage-gated channel subfamily E regulatory beta subunit 5	3301	10534735	2018	NA	Sun BB	public	1	Males and Females	0	29875488	European		NA	Protein	Immune system	NA
prot-a-1613	Potassium voltage-gated channel subfamily E regulatory beta subunit 5	3301	10534735	2018	NA	Sun BB	public	1	Males and Females	0	29875488	European		NA	Protein	Immune system	NA
prot-a-1614	Potassium voltage-gated channel subfamily F member 1	3301	10534735	2018	NA	Sun BB	public	1	Males and Females	0	29875488	European		NA	Protein	Immune system	NA
prot-a-1616	Kv channel-interacting protein 1	3301	10534735	2018	NA	Sun BB	public	1	Males and Females	0	29875488	European		NA	Protein	Immune system	NA
prot-a-162	ADP-ribosylation factor-like protein 3	3301	10534735	2018	NA	Sun BB	public	1	Males and Females	0	29875488	European		NA	Protein	Immune system	NA
prot-a-1621	KDEL motif-containing protein 2	3301	10534735	2018	NA	Sun BB	public	1	Males and Females	0	29875488	European		NA	Protein	Immune system	NA
prot-a-1622	Vascular endothelial growth factor receptor 2	3301	10534735	2018	NA	Sun BB	public	1	Males and Females	0	29875488	European		NA	Protein	Immune system	NA
prot-a-1624	Uncharacterized protein KIAA0040	3301	10534735	2018	NA	Sun BB	public	1	Males and Females	0	29875488	European		NA	Protein	Immune system	NA
prot-a-1628	Uncharacterized family 31 glucosidase KIAA1161	3301	10534735	2018	NA	Sun BB	public	1	Males and Females	0	29875488	European		NA	Protein	Immune system	NA
prot-a-1631	UPF0577 protein KIAA1324	3301	10534735	2018	NA	Sun BB	public	1	Males and Females	0	29875488	European		NA	Protein	Immune system	NA
prot-a-1632	UPF0577 protein KIAA1324-like	3301	10534735	2018	NA	Sun BB	public	1	Males and Females	0	29875488	European		NA	Protein	Immune system	NA
prot-a-1634	Uncharacterized protein KIAA2013	3301	10534735	2018	NA	Sun BB	public	1	Males and Females	0	29875488	European		NA	Protein	Immune system	NA
prot-a-1635	Kinesin-like protein KIF16B	3301	10534735	2018	NA	Sun BB	public	1	Males and Females	0	29875488	European		NA	Protein	Immune system	NA
prot-a-1638	DNA/RNA-binding protein KIN17	3301	10534735	2018	NA	Sun BB	public	1	Males and Females	0	29875488	European		NA	Protein	Immune system	NA
prot-a-1639	DNA/RNA-binding protein KIN17	3301	10534735	2018	NA	Sun BB	public	1	Males and Females	0	29875488	European		NA	Protein	Immune system	NA
prot-a-164	Armadillo repeat-containing protein 5	3301	10534735	2018	NA	Sun BB	public	1	Males and Females	0	29875488	European		NA	Protein	Immune system	NA
prot-a-1640	Killer cell immunoglobulin-like receptor 2DL2	3301	10534735	2018	NA	Sun BB	public	1	Males and Females	0	29875488	European		NA	Protein	Immune system	NA
prot-a-1642	Killer cell immunoglobulin-like receptor 2DL4	3301	10534735	2018	NA	Sun BB	public	1	Males and Females	0	29875488	European		NA	Protein	Immune system	NA
prot-a-1643	Killer cell immunoglobulin-like receptor 2DL5A	3301	10534735	2018	NA	Sun BB	public	1	Males and Females	0	29875488	European		NA	Protein	Immune system	NA
prot-a-1644	Killer cell immunoglobulin-like receptor 2DL5A	3301	10534735	2018	NA	Sun BB	public	1	Males and Females	0	29875488	European		NA	Protein	Immune system	NA
prot-a-1645	Killer cell immunoglobulin-like receptor 2DS2	3301	10534735	2018	NA	Sun BB	public	1	Males and Females	0	29875488	European		NA	Protein	Immune system	NA
prot-a-165	Armadillo repeat-containing protein 5	3301	10534735	2018	NA	Sun BB	public	1	Males and Females	0	29875488	European		NA	Protein	Immune system	NA
prot-a-1651	Kin of IRRE-like protein 3	3301	10534735	2018	NA	Sun BB	public	1	Males and Females	0	29875488	European		NA	Protein	Immune system	NA
prot-a-1653	Kit ligand	3301	10534735	2018	NA	Sun BB	public	1	Males and Females	0	29875488	European		NA	Protein	Immune system	NA
prot-a-1655	Kelch-like protein 13	3301	10534735	2018	NA	Sun BB	public	1	Males and Females	0	29875488	European		NA	Protein	Immune system	NA
prot-a-1656	Kallikrein-11	3301	10534735	2018	NA	Sun BB	public	1	Males and Females	0	29875488	European		NA	Protein	Immune system	NA
prot-a-1657	Kallikrein-12	3301	10534735	2018	NA	Sun BB	public	1	Males and Females	0	29875488	European		NA	Protein	Immune system	NA
prot-a-1659	Kallikrein-14	3301	10534735	2018	NA	Sun BB	public	1	Males and Females	0	29875488	European		NA	Protein	Immune system	NA
prot-a-166	Actin-related protein 2/3 complex subunit 3	3301	10534735	2018	NA	Sun BB	public	1	Males and Females	0	29875488	European		NA	Protein	Immune system	NA
prot-a-1662	Kallikrein-4	3301	10534735	2018	NA	Sun BB	public	1	Males and Females	0	29875488	European		NA	Protein	Immune system	NA
prot-a-1663	Kallikrein-5	3301	10534735	2018	NA	Sun BB	public	1	Males and Females	0	29875488	European		NA	Protein	Immune system	NA
prot-a-1665	Kallikrein-6	3301	10534735	2018	NA	Sun BB	public	1	Males and Females	0	29875488	European		NA	Protein	Immune system	NA
prot-a-1666	Kallikrein-7	3301	10534735	2018	NA	Sun BB	public	1	Males and Females	0	29875488	European		NA	Protein	Immune system	NA
prot-a-1667	Kallikrein-8	3301	10534735	2018	NA	Sun BB	public	1	Males and Females	0	29875488	European		NA	Protein	Immune system	NA
prot-a-1668	Kallikrein-8	3301	10534735	2018	NA	Sun BB	public	1	Males and Females	0	29875488	European		NA	Protein	Immune system	NA
prot-a-167	cAMP-regulated phosphoprotein 19	3301	10534735	2018	NA	Sun BB	public	1	Males and Females	0	29875488	European		NA	Protein	Immune system	NA
prot-a-1670	NKG2-E type II integral membrane protein	3301	10534735	2018	NA	Sun BB	public	1	Males and Females	0	29875488	European		NA	Protein	Immune system	NA
prot-a-1671	NKG2-E type II integral membrane protein	3301	10534735	2018	NA	Sun BB	public	1	Males and Females	0	29875488	European		NA	Protein	Immune system	NA
prot-a-1673	Killer cell lectin-like receptor subfamily F member 1	3301	10534735	2018	NA	Sun BB	public	1	Males and Females	0	29875488	European		NA	Protein	Immune system	NA
prot-a-1676	Histone-lysine N-methyltransferase 2C	3301	10534735	2018	NA	Sun BB	public	1	Males and Females	0	29875488	European		NA	Protein	Immune system	NA
prot-a-1677	Importin subunit alpha-1	3301	10534735	2018	NA	Sun BB	public	1	Males and Females	0	29875488	European		NA	Protein	Immune system	NA
prot-a-1679	GTPase KRas	3301	10534735	2018	NA	Sun BB	public	1	Males and Females	0	29875488	European		NA	Protein	Immune system	NA
prot-a-1681	Kremen protein 2	3301	10534735	2018	NA	Sun BB	public	1	Males and Females	0	29875488	European		NA	Protein	Immune system	NA
prot-a-1682	Keratin, type I cytoskeletal 17	3301	10534735	2018	NA	Sun BB	public	1	Males and Females	0	29875488	European		NA	Protein	Immune system	NA
prot-a-1687	Keratin-associated protein 2-4	3301	10534735	2018	NA	Sun BB	public	1	Males and Females	0	29875488	European		NA	Protein	Immune system	NA
prot-a-1688	Keratinocyte differentiation-associated protein	3301	10534735	2018	NA	Sun BB	public	1	Males and Females	0	29875488	European		NA	Protein	Immune system	NA
prot-a-1689	Kynureninase	3301	10534735	2018	NA	Sun BB	public	1	Males and Females	0	29875488	European		NA	Protein	Immune system	NA
prot-a-169	Beta-arrestin-1	3301	10534735	2018	NA	Sun BB	public	1	Males and Females	0	29875488	European		NA	Protein	Immune system	NA
prot-a-1690	Neural cell adhesion molecule L1	3301	10534735	2018	NA	Sun BB	public	1	Males and Females	0	29875488	European		NA	Protein	Immune system	NA
prot-a-1693	Lymphocyte activation gene 3 protein	3301	10534735	2018	NA	Sun BB	public	1	Males and Females	0	29875488	European		NA	Protein	Immune system	NA
prot-a-1695	Laminin	3301	10534735	2018	NA	Sun BB	public	1	Males and Females	0	29875488	European		NA	Protein	Immune system	NA
prot-a-1696	Laminin subunit alpha-4	3301	10534735	2018	NA	Sun BB	public	1	Males and Females	0	29875488	European		NA	Protein	Immune system	NA
prot-a-1697	Laminin subunit gamma-2	3301	10534735	2018	NA	Sun BB	public	1	Males and Females	0	29875488	European		NA	Protein	Immune system	NA
prot-a-1699	Ragulator complex protein LAMTOR3	3301	10534735	2018	NA	Sun BB	public	1	Males and Females	0	29875488	European		NA	Protein	Immune system	NA
prot-a-17	ATP-citrate synthase	3301	10534735	2018	NA	Sun BB	public	1	Males and Females	0	29875488	European		NA	Protein	Immune system	NA
prot-a-170	Arrestin domain-containing protein 3	3301	10534735	2018	NA	Sun BB	public	1	Males and Females	0	29875488	European		NA	Protein	Immune system	NA
prot-a-1703	Layilin	3301	10534735	2018	NA	Sun BB	public	1	Males and Females	0	29875488	European		NA	Protein	Immune system	NA
prot-a-1705	Tyrosine-protein kinase Lck	3301	10534735	2018	NA	Sun BB	public	1	Males and Females	0	29875488	European		NA	Protein	Immune system	NA
prot-a-1707	Epididymal-specific lipocalin-10	3301	10534735	2018	NA	Sun BB	public	1	Males and Females	0	29875488	European		NA	Protein	Immune system	NA
prot-a-1711	Ligand-dependent nuclear receptor corepressor-like protein	3301	10534735	2018	NA	Sun BB	public	1	Males and Females	0	29875488	European		NA	Protein	Immune system	NA
prot-a-1712	Plastin-2	3301	10534735	2018	NA	Sun BB	public	1	Males and Females	0	29875488	European		NA	Protein	Immune system	NA
prot-a-1713	Lactase-phlorizin hydrolase	3301	10534735	2018	NA	Sun BB	public	1	Males and Females	0	29875488	European		NA	Protein	Immune system	NA
prot-a-1718	Protein LDOC1	3301	10534735	2018	NA	Sun BB	public	1	Males and Females	0	29875488	European		NA	Protein	Immune system	NA
prot-a-1719	Leukocyte cell-derived chemotaxin 1	3301	10534735	2018	NA	Sun BB	public	1	Males and Females	0	29875488	European		NA	Protein	Immune system	NA
prot-a-1720	LEM domain-containing protein 1	3301	10534735	2018	NA	Sun BB	public	1	Males and Females	0	29875488	European		NA	Protein	Immune system	NA
prot-a-1724	Leptin receptor	3301	10534735	2018	NA	Sun BB	public	1	Males and Females	0	29875488	European		NA	Protein	Immune system	NA
prot-a-1727	Galectin-2	3301	10534735	2018	NA	Sun BB	public	1	Males and Females	0	29875488	European		NA	Protein	Immune system	NA
prot-a-1728	Galectin-4	3301	10534735	2018	NA	Sun BB	public	1	Males and Females	0	29875488	European		NA	Protein	Immune system	NA
prot-a-1729	Galectin-7	3301	10534735	2018	NA	Sun BB	public	1	Males and Females	0	29875488	European		NA	Protein	Immune system	NA
prot-a-173	Arylsulfatase K	3301	10534735	2018	NA	Sun BB	public	1	Males and Females	0	29875488	European		NA	Protein	Immune system	NA
prot-a-1732	Galectin-9	3301	10534735	2018	NA	Sun BB	public	1	Males and Females	0	29875488	European		NA	Protein	Immune system	NA
prot-a-1735	Lutropin subunit beta	3301	10534735	2018	NA	Sun BB	public	1	Males and Females	0	29875488	European		NA	Protein	Immune system	NA
prot-a-1736	Leukemia inhibitory factor	3301	10534735	2018	NA	Sun BB	public	1	Males and Females	0	29875488	European		NA	Protein	Immune system	NA
prot-a-1737	Leukemia inhibitory factor receptor	3301	10534735	2018	NA	Sun BB	public	1	Males and Females	0	29875488	European		NA	Protein	Immune system	NA
prot-a-1738	Leukocyte immunoglobulin-like receptor subfamily A member 4	3301	10534735	2018	NA	Sun BB	public	1	Males and Females	0	29875488	European		NA	Protein	Immune system	NA
prot-a-1739	Leukocyte immunoglobulin-like receptor subfamily A member 5	3301	10534735	2018	NA	Sun BB	public	1	Males and Females	0	29875488	European		NA	Protein	Immune system	NA
prot-a-174	Ecto-ADP-ribosyltransferase 3	3301	10534735	2018	NA	Sun BB	public	1	Males and Females	0	29875488	European		NA	Protein	Immune system	NA
prot-a-1740	Leukocyte immunoglobulin-like receptor subfamily A member 5	3301	10534735	2018	NA	Sun BB	public	1	Males and Females	0	29875488	European		NA	Protein	Immune system	NA
prot-a-1741	Leukocyte immunoglobulin-like receptor subfamily A member 6	3301	10534735	2018	NA	Sun BB	public	1	Males and Females	0	29875488	European		NA	Protein	Immune system	NA
prot-a-1742	Leukocyte immunoglobulin-like receptor subfamily B member 1	3301	10534735	2018	NA	Sun BB	public	1	Males and Females	0	29875488	European		NA	Protein	Immune system	NA
prot-a-1743	Leukocyte immunoglobulin-like receptor subfamily B member 2	3301	10534735	2018	NA	Sun BB	public	1	Males and Females	0	29875488	European		NA	Protein	Immune system	NA
prot-a-1744	Leukocyte immunoglobulin-like receptor subfamily B member 2	3301	10534735	2018	NA	Sun BB	public	1	Males and Females	0	29875488	European		NA	Protein	Immune system	NA
prot-a-1745	Leukocyte immunoglobulin-like receptor subfamily B member 3	3301	10534735	2018	NA	Sun BB	public	1	Males and Females	0	29875488	European		NA	Protein	Immune system	NA
prot-a-1746	Leukocyte immunoglobulin-like receptor subfamily B member 4	3301	10534735	2018	NA	Sun BB	public	1	Males and Females	0	29875488	European		NA	Protein	Immune system	NA
prot-a-1747	Leukocyte immunoglobulin-like receptor subfamily B member 5	3301	10534735	2018	NA	Sun BB	public	1	Males and Females	0	29875488	European		NA	Protein	Immune system	NA
prot-a-175	Ecto-ADP-ribosyltransferase 3	3301	10534735	2018	NA	Sun BB	public	1	Males and Females	0	29875488	European		NA	Protein	Immune system	NA
prot-a-1753	Lipase member N	3301	10534735	2018	NA	Sun BB	public	1	Males and Females	0	29875488	European		NA	Protein	Immune system	NA
prot-a-1754	Vesicular integral-membrane protein VIP36	3301	10534735	2018	NA	Sun BB	public	1	Males and Females	0	29875488	European		NA	Protein	Immune system	NA
prot-a-1755	Vesicular integral-membrane protein VIP36	3301	10534735	2018	NA	Sun BB	public	1	Males and Females	0	29875488	European		NA	Protein	Immune system	NA
prot-a-1756	VIP36-like protein	3301	10534735	2018	NA	Sun BB	public	1	Males and Females	0	29875488	European		NA	Protein	Immune system	NA
prot-a-1758	Lamin-B1	3301	10534735	2018	NA	Sun BB	public	1	Males and Females	0	29875488	European		NA	Protein	Immune system	NA
prot-a-1759	Leiomodin-1	3301	10534735	2018	NA	Sun BB	public	1	Males and Females	0	29875488	European		NA	Protein	Immune system	NA
prot-a-176	Ecto-ADP-ribosyltransferase 4	3301	10534735	2018	NA	Sun BB	public	1	Males and Females	0	29875488	European		NA	Protein	Immune system	NA
prot-a-1761	Lon protease homolog, mitochondrial	3301	10534735	2018	NA	Sun BB	public	1	Males and Females	0	29875488	European		NA	Protein	Immune system	NA
prot-a-1762	Lysyl oxidase homolog 2	3301	10534735	2018	NA	Sun BB	public	1	Males and Females	0	29875488	European		NA	Protein	Immune system	NA
prot-a-1764	Lysophosphatidylcholine acyltransferase 2	3301	10534735	2018	NA	Sun BB	public	1	Males and Females	0	29875488	European		NA	Protein	Immune system	NA
prot-a-1765	Lactoperoxidase	3301	10534735	2018	NA	Sun BB	public	1	Males and Females	0	29875488	European		NA	Protein	Immune system	NA
prot-a-1768	Leucine-rich repeat and fibronectin type III domain-containing protein 1	3301	10534735	2018	NA	Sun BB	public	1	Males and Females	0	29875488	European		NA	Protein	Immune system	NA
prot-a-1770	Leucine-rich repeats and immunoglobulin-like domains protein 3	3301	10534735	2018	NA	Sun BB	public	1	Males and Females	0	29875488	European		NA	Protein	Immune system	NA
prot-a-1778	Low-density lipoprotein receptor-related protein 1B	3301	10534735	2018	NA	Sun BB	public	1	Males and Females	0	29875488	European		NA	Protein	Immune system	NA
prot-a-1779	Low-density lipoprotein receptor-related protein 1B	3301	10534735	2018	NA	Sun BB	public	1	Males and Females	0	29875488	European		NA	Protein	Immune system	NA
prot-a-178	Acid ceramidase	3301	10534735	2018	NA	Sun BB	public	1	Males and Females	0	29875488	European		NA	Protein	Immune system	NA
prot-a-1781	alpha-2-macroglobulin receptor-associated protein	3301	10534735	2018	NA	Sun BB	public	1	Males and Females	0	29875488	European		NA	Protein	Immune system	NA
prot-a-1782	alpha-2-macroglobulin receptor-associated protein	3301	10534735	2018	NA	Sun BB	public	1	Males and Females	0	29875488	European		NA	Protein	Immune system	NA
prot-a-1783	Leucine-rich PPR motif-containing protein, mitochondrial	3301	10534735	2018	NA	Sun BB	public	1	Males and Females	0	29875488	European		NA	Protein	Immune system	NA
prot-a-1784	Leucine-rich repeat-containing protein 15	3301	10534735	2018	NA	Sun BB	public	1	Males and Females	0	29875488	European		NA	Protein	Immune system	NA
prot-a-1785	Leucine-rich repeat-containing protein 19	3301	10534735	2018	NA	Sun BB	public	1	Males and Females	0	29875488	European		NA	Protein	Immune system	NA
prot-a-1787	Leucine-rich repeat-containing protein 37A2	3301	10534735	2018	NA	Sun BB	public	1	Males and Females	0	29875488	European		NA	Protein	Immune system	NA
prot-a-179	Neutral ceramidase	3301	10534735	2018	NA	Sun BB	public	1	Males and Females	0	29875488	European		NA	Protein	Immune system	NA
prot-a-1790	Leucine-rich repeat-containing protein 74A	3301	10534735	2018	NA	Sun BB	public	1	Males and Females	0	29875488	European		NA	Protein	Immune system	NA
prot-a-1791	Leucine-rich repeat serine/threonine-protein kinase 2	3301	10534735	2018	NA	Sun BB	public	1	Males and Females	0	29875488	European		NA	Protein	Immune system	NA
prot-a-1792	Leucine-rich repeat neuronal protein 1	3301	10534735	2018	NA	Sun BB	public	1	Males and Females	0	29875488	European		NA	Protein	Immune system	NA
prot-a-1793	Leucine-rich repeat neuronal protein 1	3301	10534735	2018	NA	Sun BB	public	1	Males and Females	0	29875488	European		NA	Protein	Immune system	NA
prot-a-18	Low molecular weight phosphotyrosine protein phosphatase	3301	10534735	2018	NA	Sun BB	public	1	Males and Females	0	29875488	European		NA	Protein	Immune system	NA
prot-a-180	Arf-GAP with SH3 domain, ANK repeat and PH domain-containing protein 2	3301	10534735	2018	NA	Sun BB	public	1	Males and Females	0	29875488	European		NA	Protein	Immune system	NA
prot-a-1800	Leucine-rich repeat and transmembrane domain-containing protein 2	3301	10534735	2018	NA	Sun BB	public	1	Males and Females	0	29875488	European		NA	Protein	Immune system	NA
prot-a-1801	Limbic system-associated membrane protein	3301	10534735	2018	NA	Sun BB	public	1	Males and Females	0	29875488	European		NA	Protein	Immune system	NA
prot-a-1802	Leukocyte-specific transcript 1 protein	3301	10534735	2018	NA	Sun BB	public	1	Males and Females	0	29875488	European		NA	Protein	Immune system	NA
prot-a-1805	Lymphotoxin alpha2:beta1	3301	10534735	2018	NA	Sun BB	public	1	Males and Females	0	29875488	European		NA	Protein	Immune system	NA
prot-a-1807	Tumor necrosis factor receptor superfamily member 3	3301	10534735	2018	NA	Sun BB	public	1	Males and Females	0	29875488	European		NA	Protein	Immune system	NA
prot-a-1808	Lactotransferrin	3301	10534735	2018	NA	Sun BB	public	1	Males and Females	0	29875488	European		NA	Protein	Immune system	NA
prot-a-1809	Lactotransferrin	3301	10534735	2018	NA	Sun BB	public	1	Males and Females	0	29875488	European		NA	Protein	Immune system	NA
prot-a-181	Activating signal cointegrator 1 complex subunit 1	3301	10534735	2018	NA	Sun BB	public	1	Males and Females	0	29875488	European		NA	Protein	Immune system	NA
prot-a-1810	Lymphocyte antigen 6 complex locus protein G6c	3301	10534735	2018	NA	Sun BB	public	1	Males and Females	0	29875488	European		NA	Protein	Immune system	NA
prot-a-1814	Lysozyme g-like protein 1	3301	10534735	2018	NA	Sun BB	public	1	Males and Females	0	29875488	European		NA	Protein	Immune system	NA
prot-a-1815	Tyrosine-protein kinase Lyn, isoform B	3301	10534735	2018	NA	Sun BB	public	1	Males and Females	0	29875488	European		NA	Protein	Immune system	NA
prot-a-1816	Tyrosine-protein kinase Lyn	3301	10534735	2018	NA	Sun BB	public	1	Males and Females	0	29875488	European		NA	Protein	Immune system	NA
prot-a-1819	LysM and putative peptidoglycan-binding domain-containing protein 3	3301	10534735	2018	NA	Sun BB	public	1	Males and Females	0	29875488	European		NA	Protein	Immune system	NA
prot-a-1820	LysM and putative peptidoglycan-binding domain-containing protein 4	3301	10534735	2018	NA	Sun BB	public	1	Males and Females	0	29875488	European		NA	Protein	Immune system	NA
prot-a-1821	Lysozyme C	3301	10534735	2018	NA	Sun BB	public	1	Males and Females	0	29875488	European		NA	Protein	Immune system	NA
prot-a-1822	Lysozyme-like protein 2	3301	10534735	2018	NA	Sun BB	public	1	Males and Females	0	29875488	European		NA	Protein	Immune system	NA
prot-a-1823	Cation-dependent mannose-6-phosphate receptor	3301	10534735	2018	NA	Sun BB	public	1	Males and Females	0	29875488	European		NA	Protein	Immune system	NA
prot-a-1824	O-acetyl-ADP-ribose deacetylase MACROD1	3301	10534735	2018	NA	Sun BB	public	1	Males and Females	0	29875488	European		NA	Protein	Immune system	NA
prot-a-1825	Mitotic spindle assembly checkpoint protein MAD1	3301	10534735	2018	NA	Sun BB	public	1	Males and Females	0	29875488	European		NA	Protein	Immune system	NA
prot-a-1827	Melanoma-associated antigen 10	3301	10534735	2018	NA	Sun BB	public	1	Males and Females	0	29875488	European		NA	Protein	Immune system	NA
prot-a-1828	Melanoma-associated antigen 3	3301	10534735	2018	NA	Sun BB	public	1	Males and Females	0	29875488	European		NA	Protein	Immune system	NA
prot-a-1833	Mannosyl-oligosaccharide 1,2-alpha-mannosidase IB	3301	10534735	2018	NA	Sun BB	public	1	Males and Females	0	29875488	European		NA	Protein	Immune system	NA
prot-a-1834	Endoplasmic reticulum mannosyl-oligosaccharide 1,2-alpha-mannosidase	3301	10534735	2018	NA	Sun BB	public	1	Males and Females	0	29875488	European		NA	Protein	Immune system	NA
prot-a-1835	Epididymis-specific alpha-mannosidase	3301	10534735	2018	NA	Sun BB	public	1	Males and Females	0	29875488	European		NA	Protein	Immune system	NA
prot-a-1836	Beta-mannosidase	3301	10534735	2018	NA	Sun BB	public	1	Males and Females	0	29875488	European		NA	Protein	Immune system	NA
prot-a-1837	Glycoprotein endo-alpha-1,2-mannosidase	3301	10534735	2018	NA	Sun BB	public	1	Males and Females	0	29875488	European		NA	Protein	Immune system	NA
prot-a-1838	MANSC domain-containing protein 1	3301	10534735	2018	NA	Sun BB	public	1	Males and Females	0	29875488	European		NA	Protein	Immune system	NA
prot-a-1839	MANSC domain-containing protein 4	3301	10534735	2018	NA	Sun BB	public	1	Males and Females	0	29875488	European		NA	Protein	Immune system	NA
prot-a-1840	Dual specificity mitogen-activated protein kinase kinase 1	3301	10534735	2018	NA	Sun BB	public	1	Males and Females	0	29875488	European		NA	Protein	Immune system	NA
prot-a-1841	Dual specificity mitogen-activated protein kinase kinase 3	3301	10534735	2018	NA	Sun BB	public	1	Males and Females	0	29875488	European		NA	Protein	Immune system	NA
prot-a-1842	Dual specificity mitogen-activated protein kinase kinase 4	3301	10534735	2018	NA	Sun BB	public	1	Males and Females	0	29875488	European		NA	Protein	Immune system	NA
prot-a-1843	Mitogen-activated protein kinase kinase kinase 3	3301	10534735	2018	NA	Sun BB	public	1	Males and Females	0	29875488	European		NA	Protein	Immune system	NA
prot-a-1845	Mitogen-activated protein kinase 1	3301	10534735	2018	NA	Sun BB	public	1	Males and Females	0	29875488	European		NA	Protein	Immune system	NA
prot-a-1846	Mitogen-activated protein kinase 13	3301	10534735	2018	NA	Sun BB	public	1	Males and Females	0	29875488	European		NA	Protein	Immune system	NA
prot-a-1847	Mitogen-activated protein kinase 14	3301	10534735	2018	NA	Sun BB	public	1	Males and Females	0	29875488	European		NA	Protein	Immune system	NA
prot-a-1848	Mitogen-activated protein kinase 3	3301	10534735	2018	NA	Sun BB	public	1	Males and Females	0	29875488	European		NA	Protein	Immune system	NA
prot-a-1849	Mitogen-activated protein kinase 8	3301	10534735	2018	NA	Sun BB	public	1	Males and Females	0	29875488	European		NA	Protein	Immune system	NA
prot-a-185	Set1/Ash2 histone methyltransferase complex subunit ASH2	3301	10534735	2018	NA	Sun BB	public	1	Males and Females	0	29875488	European		NA	Protein	Immune system	NA
prot-a-1851	MAP kinase-activated protein kinase 2	3301	10534735	2018	NA	Sun BB	public	1	Males and Females	0	29875488	European		NA	Protein	Immune system	NA
prot-a-1852	MAP kinase-activated protein kinase 3	3301	10534735	2018	NA	Sun BB	public	1	Males and Females	0	29875488	European		NA	Protein	Immune system	NA
prot-a-1854	MAP kinase-activated protein kinase 5	3301	10534735	2018	NA	Sun BB	public	1	Males and Females	0	29875488	European		NA	Protein	Immune system	NA
prot-a-1857	Matrilin-2	3301	10534735	2018	NA	Sun BB	public	1	Males and Females	0	29875488	European		NA	Protein	Immune system	NA
prot-a-1858	Matrilin-3	3301	10534735	2018	NA	Sun BB	public	1	Males and Females	0	29875488	European		NA	Protein	Immune system	NA
prot-a-1859	Matrilin-4	3301	10534735	2018	NA	Sun BB	public	1	Males and Females	0	29875488	European		NA	Protein	Immune system	NA
prot-a-1862	Methyl-CpG-binding domain protein 4	3301	10534735	2018	NA	Sun BB	public	1	Males and Females	0	29875488	European		NA	Protein	Immune system	NA
prot-a-1863	Mannose-binding protein C	3301	10534735	2018	NA	Sun BB	public	1	Males and Females	0	29875488	European		NA	Protein	Immune system	NA
prot-a-1865	Mast cell-expressed membrane protein 1	3301	10534735	2018	NA	Sun BB	public	1	Males and Females	0	29875488	European		NA	Protein	Immune system	NA
prot-a-1867	Multiple coagulation factor deficiency protein 2	3301	10534735	2018	NA	Sun BB	public	1	Males and Females	0	29875488	European		NA	Protein	Immune system	NA
prot-a-1868	Induced myeloid leukemia cell differentiation protein Mcl-1	3301	10534735	2018	NA	Sun BB	public	1	Males and Females	0	29875488	European		NA	Protein	Immune system	NA
prot-a-187	Agouti-signaling protein	3301	10534735	2018	NA	Sun BB	public	1	Males and Females	0	29875488	European		NA	Protein	Immune system	NA
prot-a-1870	Malate dehydrogenase, cytoplasmic	3301	10534735	2018	NA	Sun BB	public	1	Males and Females	0	29875488	European		NA	Protein	Immune system	NA
prot-a-1874	Mediator of RNA polymerase II transcription subunit 1	3301	10534735	2018	NA	Sun BB	public	1	Males and Females	0	29875488	European		NA	Protein	Immune system	NA
prot-a-1875	Mediator of RNA polymerase II transcription subunit 1	3301	10534735	2018	NA	Sun BB	public	1	Males and Females	0	29875488	European		NA	Protein	Immune system	NA
prot-a-1876	Mediator of RNA polymerase II transcription subunit 4	3301	10534735	2018	NA	Sun BB	public	1	Males and Females	0	29875488	European		NA	Protein	Immune system	NA
prot-a-1879	Protein MENT	3301	10534735	2018	NA	Sun BB	public	1	Males and Females	0	29875488	European		NA	Protein	Immune system	NA
prot-a-188	Argininosuccinate lyase	3301	10534735	2018	NA	Sun BB	public	1	Males and Females	0	29875488	European		NA	Protein	Immune system	NA
prot-a-1882	Hepatocyte growth factor receptor	3301	10534735	2018	NA	Sun BB	public	1	Males and Females	0	29875488	European		NA	Protein	Immune system	NA
prot-a-1883	tRNA (guanine-N(7)-)-methyltransferase	3301	10534735	2018	NA	Sun BB	public	1	Males and Females	0	29875488	European		NA	Protein	Immune system	NA
prot-a-1885	Microfibrillar-associated protein 2	3301	10534735	2018	NA	Sun BB	public	1	Males and Females	0	29875488	European		NA	Protein	Immune system	NA
prot-a-1888	Lactadherin	3301	10534735	2018	NA	Sun BB	public	1	Males and Females	0	29875488	European		NA	Protein	Immune system	NA
prot-a-189	N-acetylserotonin O-methyltransferase-like protein	3301	10534735	2018	NA	Sun BB	public	1	Males and Females	0	29875488	European		NA	Protein	Immune system	NA
prot-a-1891	MAX gene-associated protein	3301	10534735	2018	NA	Sun BB	public	1	Males and Females	0	29875488	European		NA	Protein	Immune system	NA
prot-a-1893	Alpha-1,6-mannosyl-glycoprotein 2-beta-N-acetylglucosaminyltransferase	3301	10534735	2018	NA	Sun BB	public	1	Males and Females	0	29875488	European		NA	Protein	Immune system	NA
prot-a-1896	Melanoma-derived growth regulatory protein	3301	10534735	2018	NA	Sun BB	public	1	Males and Females	0	29875488	European		NA	Protein	Immune system	NA
prot-a-1897	MICAL-like protein 2	3301	10534735	2018	NA	Sun BB	public	1	Males and Females	0	29875488	European		NA	Protein	Immune system	NA
prot-a-1898	MHC class I polypeptide-related sequence B	3301	10534735	2018	NA	Sun BB	public	1	Males and Females	0	29875488	European		NA	Protein	Immune system	NA
prot-a-19	Lysosomal acid phosphatase	3301	10534735	2018	NA	Sun BB	public	1	Males and Females	0	29875488	European		NA	Protein	Immune system	NA
prot-a-1900	Macrophage migration inhibitory factor	3301	10534735	2018	NA	Sun BB	public	1	Males and Females	0	29875488	European		NA	Protein	Immune system	NA
prot-a-1902	MICOS complex subunit MIC10	3301	10534735	2018	NA	Sun BB	public	1	Males and Females	0	29875488	European		NA	Protein	Immune system	NA
prot-a-1903	Multiple inositol polyphosphate phosphatase 1	3301	10534735	2018	NA	Sun BB	public	1	Males and Females	0	29875488	European		NA	Protein	Immune system	NA
prot-a-1904	Malectin	3301	10534735	2018	NA	Sun BB	public	1	Males and Females	0	29875488	European		NA	Protein	Immune system	NA
prot-a-1906	Promotilin	3301	10534735	2018	NA	Sun BB	public	1	Males and Females	0	29875488	European		NA	Protein	Immune system	NA
prot-a-191	Aspartyl/asparaginyl beta-hydroxylase	3301	10534735	2018	NA	Sun BB	public	1	Males and Females	0	29875488	European		NA	Protein	Immune system	NA
prot-a-1911	Stromelysin-2	3301	10534735	2018	NA	Sun BB	public	1	Males and Females	0	29875488	European		NA	Protein	Immune system	NA
prot-a-1916	Matrix metalloproteinase-16	3301	10534735	2018	NA	Sun BB	public	1	Males and Females	0	29875488	European		NA	Protein	Immune system	NA
prot-a-1917	Matrix metalloproteinase-17	3301	10534735	2018	NA	Sun BB	public	1	Males and Females	0	29875488	European		NA	Protein	Immune system	NA
prot-a-1920	Neutrophil collagenase	3301	10534735	2018	NA	Sun BB	public	1	Males and Females	0	29875488	European		NA	Protein	Immune system	NA
prot-a-1921	Matrix metalloproteinase-9	3301	10534735	2018	NA	Sun BB	public	1	Males and Females	0	29875488	European		NA	Protein	Immune system	NA
prot-a-1922	Multimerin-2	3301	10534735	2018	NA	Sun BB	public	1	Males and Females	0	29875488	European		NA	Protein	Immune system	NA
prot-a-1923	Multimerin-2	3301	10534735	2018	NA	Sun BB	public	1	Males and Females	0	29875488	European		NA	Protein	Immune system	NA
prot-a-1928	DNA-3-methyladenine glycosylase	3301	10534735	2018	NA	Sun BB	public	1	Males and Females	0	29875488	European		NA	Protein	Immune system	NA
prot-a-1929	Thrombopoietin Receptor	3301	10534735	2018	NA	Sun BB	public	1	Males and Females	0	29875488	European		NA	Protein	Immune system	NA
prot-a-193	Retroviral-like aspartic protease 1	3301	10534735	2018	NA	Sun BB	public	1	Males and Females	0	29875488	European		NA	Protein	Immune system	NA
prot-a-1930	Myeloperoxidase	3301	10534735	2018	NA	Sun BB	public	1	Males and Females	0	29875488	European		NA	Protein	Immune system	NA
prot-a-1931	MAGUK p55 subfamily member 6	3301	10534735	2018	NA	Sun BB	public	1	Males and Females	0	29875488	European		NA	Protein	Immune system	NA
prot-a-1933	3-mercaptopyruvate sulfurtransferase	3301	10534735	2018	NA	Sun BB	public	1	Males and Females	0	29875488	European		NA	Protein	Immune system	NA
prot-a-1936	Melanocortin-2 receptor accessory protein	3301	10534735	2018	NA	Sun BB	public	1	Males and Females	0	29875488	European		NA	Protein	Immune system	NA
prot-a-1937	Macrophage mannose receptor 1	3301	10534735	2018	NA	Sun BB	public	1	Males and Females	0	29875488	European		NA	Protein	Immune system	NA
prot-a-1938	C-type mannose receptor 2	3301	10534735	2018	NA	Sun BB	public	1	Males and Females	0	29875488	European		NA	Protein	Immune system	NA
prot-a-1940	39S ribosomal protein L14, mitochondrial	3301	10534735	2018	NA	Sun BB	public	1	Males and Females	0	29875488	European		NA	Protein	Immune system	NA
prot-a-1942	39S ribosomal protein L33, mitochondrial	3301	10534735	2018	NA	Sun BB	public	1	Males and Females	0	29875488	European		NA	Protein	Immune system	NA
prot-a-1943	39S ribosomal protein L34, mitochondrial	3301	10534735	2018	NA	Sun BB	public	1	Males and Females	0	29875488	European		NA	Protein	Immune system	NA
prot-a-1945	Ribosome-recycling factor, mitochondrial	3301	10534735	2018	NA	Sun BB	public	1	Males and Females	0	29875488	European		NA	Protein	Immune system	NA
prot-a-1946	Protein MRVI1	3301	10534735	2018	NA	Sun BB	public	1	Males and Females	0	29875488	European		NA	Protein	Immune system	NA
prot-a-1947	Mesothelin	3301	10534735	2018	NA	Sun BB	public	1	Males and Females	0	29875488	European		NA	Protein	Immune system	NA
prot-a-1949	Beta-microseminoprotein	3301	10534735	2018	NA	Sun BB	public	1	Males and Females	0	29875488	European		NA	Protein	Immune system	NA
prot-a-195	ATPase family AAA domain-containing protein 1	3301	10534735	2018	NA	Sun BB	public	1	Males and Females	0	29875488	European		NA	Protein	Immune system	NA
prot-a-1950	Prostate-associated microseminoprotein	3301	10534735	2018	NA	Sun BB	public	1	Males and Females	0	29875488	European		NA	Protein	Immune system	NA
prot-a-1952	Macrophage scavenger receptor types I and II	3301	10534735	2018	NA	Sun BB	public	1	Males and Females	0	29875488	European		NA	Protein	Immune system	NA
prot-a-1955	Macrophage-stimulating protein receptor	3301	10534735	2018	NA	Sun BB	public	1	Males and Females	0	29875488	European		NA	Protein	Immune system	NA
prot-a-1958	Metallothionein-1F	3301	10534735	2018	NA	Sun BB	public	1	Males and Females	0	29875488	European		NA	Protein	Immune system	NA
prot-a-196	ATPase family AAA domain-containing protein 2	3301	10534735	2018	NA	Sun BB	public	1	Males and Females	0	29875488	European		NA	Protein	Immune system	NA
prot-a-1962	5-formyltetrahydrofolate cyclo-ligase	3301	10534735	2018	NA	Sun BB	public	1	Males and Females	0	29875488	European		NA	Protein	Immune system	NA
prot-a-1963	Myotubularin-related protein 1	3301	10534735	2018	NA	Sun BB	public	1	Males and Females	0	29875488	European		NA	Protein	Immune system	NA
prot-a-1964	Poly(A) RNA polymerase, mitochondrial	3301	10534735	2018	NA	Sun BB	public	1	Males and Females	0	29875488	European		NA	Protein	Immune system	NA
prot-a-1965	Peptide chain release factor 1-like, mitochondrial	3301	10534735	2018	NA	Sun BB	public	1	Males and Females	0	29875488	European		NA	Protein	Immune system	NA
prot-a-1967	Mucin-1	3301	10534735	2018	NA	Sun BB	public	1	Males and Females	0	29875488	European		NA	Protein	Immune system	NA
prot-a-1968	Mucin-4	3301	10534735	2018	NA	Sun BB	public	1	Males and Females	0	29875488	European		NA	Protein	Immune system	NA
prot-a-1969	Mitochondrial ubiquitin ligase activator of NFKB 1	3301	10534735	2018	NA	Sun BB	public	1	Males and Females	0	29875488	European		NA	Protein	Immune system	NA
prot-a-197	Cyclic AMP-dependent transcription factor ATF-6 alpha	3301	10534735	2018	NA	Sun BB	public	1	Males and Females	0	29875488	European		NA	Protein	Immune system	NA
prot-a-1970	Mitochondrial ubiquitin ligase activator of NFKB 1	3301	10534735	2018	NA	Sun BB	public	1	Males and Females	0	29875488	European		NA	Protein	Immune system	NA
prot-a-1974	Matrix-remodeling-associated protein 7	3301	10534735	2018	NA	Sun BB	public	1	Males and Females	0	29875488	European		NA	Protein	Immune system	NA
prot-a-1977	Myosin-binding protein C, slow-type	3301	10534735	2018	NA	Sun BB	public	1	Males and Females	0	29875488	European		NA	Protein	Immune system	NA
prot-a-1979	Myc target protein 1	3301	10534735	2018	NA	Sun BB	public	1	Males and Females	0	29875488	European		NA	Protein	Immune system	NA
prot-a-1982	Myelin regulatory factor	3301	10534735	2018	NA	Sun BB	public	1	Males and Females	0	29875488	European		NA	Protein	Immune system	NA
prot-a-1987	Myeloid zinc finger 1	3301	10534735	2018	NA	Sun BB	public	1	Males and Females	0	29875488	European		NA	Protein	Immune system	NA
prot-a-1989	HemK methyltransferase family member 2	3301	10534735	2018	NA	Sun BB	public	1	Males and Females	0	29875488	European		NA	Protein	Immune system	NA
prot-a-199	Sodium/potassium-transporting ATPase subunit alpha-1	3301	10534735	2018	NA	Sun BB	public	1	Males and Females	0	29875488	European		NA	Protein	Immune system	NA
prot-a-1990	N-acylethanolamine-hydrolyzing acid amidase	3301	10534735	2018	NA	Sun BB	public	1	Males and Females	0	29875488	European		NA	Protein	Immune system	NA
prot-a-1991	N-acetylated-alpha-linked acidic dipeptidase 2	3301	10534735	2018	NA	Sun BB	public	1	Males and Females	0	29875488	European		NA	Protein	Immune system	NA
prot-a-1994	NAD kinase	3301	10534735	2018	NA	Sun BB	public	1	Males and Females	0	29875488	European		NA	Protein	Immune system	NA
prot-a-1995	N-acetyl-D-glucosamine kinase	3301	10534735	2018	NA	Sun BB	public	1	Males and Females	0	29875488	European		NA	Protein	Immune system	NA
prot-a-1996	N-acetylglucosamine-1-phosphodiester alpha-N-acetylglucosaminidase	3301	10534735	2018	NA	Sun BB	public	1	Males and Females	0	29875488	European		NA	Protein	Immune system	NA
prot-a-1998	Nicotinamide phosphoribosyltransferase	3301	10534735	2018	NA	Sun BB	public	1	Males and Females	0	29875488	European		NA	Protein	Immune system	NA
prot-a-1999	Nucleosome assembly protein 1-like 2	3301	10534735	2018	NA	Sun BB	public	1	Males and Females	0	29875488	European		NA	Protein	Immune system	NA
prot-a-200	Sodium/potassium-transporting ATPase subunit beta-2	3301	10534735	2018	NA	Sun BB	public	1	Males and Females	0	29875488	European		NA	Protein	Immune system	NA
prot-a-2000	Beta-soluble NSF attachment protein	3301	10534735	2018	NA	Sun BB	public	1	Males and Females	0	29875488	European		NA	Protein	Immune system	NA
prot-a-2001	Arylamine N-acetyltransferase 1	3301	10534735	2018	NA	Sun BB	public	1	Males and Females	0	29875488	European		NA	Protein	Immune system	NA
prot-a-2004	Next to BRCA1 gene 1 protein	3301	10534735	2018	NA	Sun BB	public	1	Males and Females	0	29875488	European		NA	Protein	Immune system	NA
prot-a-2006	Neural cell adhesion molecule 1, 120 kDa isoform	3301	10534735	2018	NA	Sun BB	public	1	Males and Females	0	29875488	European		NA	Protein	Immune system	NA
prot-a-2008	Neural cell adhesion molecule 2	3301	10534735	2018	NA	Sun BB	public	1	Males and Females	0	29875488	European		NA	Protein	Immune system	NA
prot-a-2009	Neutrophil cytosol factor 2	3301	10534735	2018	NA	Sun BB	public	1	Males and Females	0	29875488	European		NA	Protein	Immune system	NA
prot-a-201	Sarcoplasmic/endoplasmic reticulum calcium ATPase 3	3301	10534735	2018	NA	Sun BB	public	1	Males and Females	0	29875488	European		NA	Protein	Immune system	NA
prot-a-2012	Nuclear receptor coactivator 2	3301	10534735	2018	NA	Sun BB	public	1	Males and Females	0	29875488	European		NA	Protein	Immune system	NA
prot-a-2013	Natural cytotoxicity triggering receptor 1	3301	10534735	2018	NA	Sun BB	public	1	Males and Females	0	29875488	European		NA	Protein	Immune system	NA
prot-a-2014	Natural cytotoxicity triggering receptor 1	3301	10534735	2018	NA	Sun BB	public	1	Males and Females	0	29875488	European		NA	Protein	Immune system	NA
prot-a-2016	Natural cytotoxicity triggering receptor 3	3301	10534735	2018	NA	Sun BB	public	1	Males and Females	0	29875488	European		NA	Protein	Immune system	NA
prot-a-2017	Natural cytotoxicity triggering receptor 3 ligand 1	3301	10534735	2018	NA	Sun BB	public	1	Males and Females	0	29875488	European		NA	Protein	Immune system	NA
prot-a-2018	Kinetochore protein NDC80 homolog	3301	10534735	2018	NA	Sun BB	public	1	Males and Females	0	29875488	European		NA	Protein	Immune system	NA
prot-a-2019	Protein NDNF	3301	10534735	2018	NA	Sun BB	public	1	Males and Females	0	29875488	European		NA	Protein	Immune system	NA
prot-a-202	Potassium-transporting ATPase subunit beta	3301	10534735	2018	NA	Sun BB	public	1	Males and Females	0	29875488	European		NA	Protein	Immune system	NA
prot-a-2020	Protein NDRG4	3301	10534735	2018	NA	Sun BB	public	1	Males and Females	0	29875488	European		NA	Protein	Immune system	NA
prot-a-2021	Bifunctional heparan sulfate N-deacetylase/N-sulfotransferase 1	3301	10534735	2018	NA	Sun BB	public	1	Males and Females	0	29875488	European		NA	Protein	Immune system	NA
prot-a-2023	NADH dehydrogenase [ubiquinone] 1 beta subcomplex subunit 4	3301	10534735	2018	NA	Sun BB	public	1	Males and Females	0	29875488	European		NA	Protein	Immune system	NA
prot-a-2025	NADH dehydrogenase [ubiquinone] iron-sulfur protein 4, mitochondrial	3301	10534735	2018	NA	Sun BB	public	1	Males and Females	0	29875488	European		NA	Protein	Immune system	NA
prot-a-203	ATP synthase subunit beta, mitochondrial	3301	10534735	2018	NA	Sun BB	public	1	Males and Females	0	29875488	European		NA	Protein	Immune system	NA
prot-a-2030	Protein kinase C-binding protein NELL1	3301	10534735	2018	NA	Sun BB	public	1	Males and Females	0	29875488	European		NA	Protein	Immune system	NA
prot-a-2033	Neogenin	3301	10534735	2018	NA	Sun BB	public	1	Males and Females	0	29875488	European		NA	Protein	Immune system	NA
prot-a-2034	Neuroepithelial cell-transforming gene 1 protein	3301	10534735	2018	NA	Sun BB	public	1	Males and Females	0	29875488	European		NA	Protein	Immune system	NA
prot-a-2037	E3 ubiquitin-protein ligase NEURL1	3301	10534735	2018	NA	Sun BB	public	1	Males and Females	0	29875488	European		NA	Protein	Immune system	NA
prot-a-2038	Neuralized-like protein 4	3301	10534735	2018	NA	Sun BB	public	1	Males and Females	0	29875488	European		NA	Protein	Immune system	NA
prot-a-2039	Neurofascin	3301	10534735	2018	NA	Sun BB	public	1	Males and Females	0	29875488	European		NA	Protein	Immune system	NA
prot-a-2040	Nuclear factor erythroid 2-related factor 1	3301	10534735	2018	NA	Sun BB	public	1	Males and Females	0	29875488	European		NA	Protein	Immune system	NA
prot-a-2042	beta-nerve growth factor	3301	10534735	2018	NA	Sun BB	public	1	Males and Females	0	29875488	European		NA	Protein	Immune system	NA
prot-a-2043	Tumor necrosis factor receptor superfamily member 16	3301	10534735	2018	NA	Sun BB	public	1	Males and Females	0	29875488	European		NA	Protein	Immune system	NA
prot-a-2044	Tumor necrosis factor receptor superfamily member 16	3301	10534735	2018	NA	Sun BB	public	1	Males and Females	0	29875488	European		NA	Protein	Immune system	NA
prot-a-2048	NHP2-like protein 1	3301	10534735	2018	NA	Sun BB	public	1	Males and Females	0	29875488	European		NA	Protein	Immune system	NA
prot-a-2049	Nidogen-1	3301	10534735	2018	NA	Sun BB	public	1	Males and Females	0	29875488	European		NA	Protein	Immune system	NA
prot-a-205	Aurora kinase B	3301	10534735	2018	NA	Sun BB	public	1	Males and Females	0	29875488	European		NA	Protein	Immune system	NA
prot-a-2050	Nidogen-2	3301	10534735	2018	NA	Sun BB	public	1	Males and Females	0	29875488	European		NA	Protein	Immune system	NA
prot-a-2052	Nischarin	3301	10534735	2018	NA	Sun BB	public	1	Males and Females	0	29875488	European		NA	Protein	Immune system	NA
prot-a-206	Axin-2	3301	10534735	2018	NA	Sun BB	public	1	Males and Females	0	29875488	European		NA	Protein	Immune system	NA
prot-a-2060	Nucleoside diphosphate kinase B	3301	10534735	2018	NA	Sun BB	public	1	Males and Females	0	29875488	European		NA	Protein	Immune system	NA
prot-a-2061	Normal mucosa of esophagus-specific gene 1 protein	3301	10534735	2018	NA	Sun BB	public	1	Males and Females	0	29875488	European		NA	Protein	Immune system	NA
prot-a-2062	NmrA-like family domain-containing protein 1	3301	10534735	2018	NA	Sun BB	public	1	Males and Females	0	29875488	European		NA	Protein	Immune system	NA
prot-a-2064	Noggin	3301	10534735	2018	NA	Sun BB	public	1	Males and Females	0	29875488	European		NA	Protein	Immune system	NA
prot-a-2067	Neurogenic locus notch homolog protein 1	3301	10534735	2018	NA	Sun BB	public	1	Males and Females	0	29875488	European		NA	Protein	Immune system	NA
prot-a-2069	Protein NOV homolog	3301	10534735	2018	NA	Sun BB	public	1	Males and Females	0	29875488	European		NA	Protein	Immune system	NA
prot-a-207	Axin-2	3301	10534735	2018	NA	Sun BB	public	1	Males and Females	0	29875488	European		NA	Protein	Immune system	NA
prot-a-2070	RNA-binding protein Nova-1	3301	10534735	2018	NA	Sun BB	public	1	Males and Females	0	29875488	European		NA	Protein	Immune system	NA
prot-a-2071	Epididymal secretory protein E1	3301	10534735	2018	NA	Sun BB	public	1	Males and Females	0	29875488	European		NA	Protein	Immune system	NA
prot-a-2073	Pro-FMRFamide-related neuropeptide FF	3301	10534735	2018	NA	Sun BB	public	1	Males and Females	0	29875488	European		NA	Protein	Immune system	NA
prot-a-2074	Nuclear pore complex-interacting protein family member B3	3301	10534735	2018	NA	Sun BB	public	1	Males and Females	0	29875488	European		NA	Protein	Immune system	NA
prot-a-2075	Nuclear protein localization protein 4 homolog	3301	10534735	2018	NA	Sun BB	public	1	Males and Females	0	29875488	European		NA	Protein	Immune system	NA
prot-a-2076	Atrial natriuretic factor	3301	10534735	2018	NA	Sun BB	public	1	Males and Females	0	29875488	European		NA	Protein	Immune system	NA
prot-a-2078	N-terminal pro-BNP	3301	10534735	2018	NA	Sun BB	public	1	Males and Females	0	29875488	European		NA	Protein	Immune system	NA
prot-a-2079	Neuropeptide S	3301	10534735	2018	NA	Sun BB	public	1	Males and Females	0	29875488	European		NA	Protein	Immune system	NA
prot-a-208	Zinc-alpha-2-glycoprotein	3301	10534735	2018	NA	Sun BB	public	1	Males and Females	0	29875488	European		NA	Protein	Immune system	NA
prot-a-2080	Neuronal pentraxin-1	3301	10534735	2018	NA	Sun BB	public	1	Males and Females	0	29875488	European		NA	Protein	Immune system	NA
prot-a-2081	Neuronal pentraxin-2	3301	10534735	2018	NA	Sun BB	public	1	Males and Females	0	29875488	European		NA	Protein	Immune system	NA
prot-a-2082	Neuropeptide W	3301	10534735	2018	NA	Sun BB	public	1	Males and Females	0	29875488	European		NA	Protein	Immune system	NA
prot-a-2083	NAD(P)H dehydrogenase [quinone] 1	3301	10534735	2018	NA	Sun BB	public	1	Males and Females	0	29875488	European		NA	Protein	Immune system	NA
prot-a-2084	Ribosyldihydronicotinamide dehydrogenase [quinone]	3301	10534735	2018	NA	Sun BB	public	1	Males and Females	0	29875488	European		NA	Protein	Immune system	NA
prot-a-2086	Nuclear receptor subfamily 1 group D member 2	3301	10534735	2018	NA	Sun BB	public	1	Males and Females	0	29875488	European		NA	Protein	Immune system	NA
prot-a-2087	Oxysterols receptor LXR-beta	3301	10534735	2018	NA	Sun BB	public	1	Males and Females	0	29875488	European		NA	Protein	Immune system	NA
prot-a-2089	Mineralocorticoid receptor	3301	10534735	2018	NA	Sun BB	public	1	Males and Females	0	29875488	European		NA	Protein	Immune system	NA
prot-a-2092	Nutritionally-regulated adipose and cardiac enriched protein homolog	3301	10534735	2018	NA	Sun BB	public	1	Males and Females	0	29875488	European		NA	Protein	Immune system	NA
prot-a-2096	Pro-neuregulin-2, membrane-bound isoform	3301	10534735	2018	NA	Sun BB	public	1	Males and Females	0	29875488	European		NA	Protein	Immune system	NA
prot-a-2099	Neuropilin-1	3301	10534735	2018	NA	Sun BB	public	1	Males and Females	0	29875488	European		NA	Protein	Immune system	NA
prot-a-21	2-phosphoxylose phosphatase 1	3301	10534735	2018	NA	Sun BB	public	1	Males and Females	0	29875488	European		NA	Protein	Immune system	NA
prot-a-210	Beta-1,3-glucosyltransferase	3301	10534735	2018	NA	Sun BB	public	1	Males and Females	0	29875488	European		NA	Protein	Immune system	NA
prot-a-2100	Neuropilin-2	3301	10534735	2018	NA	Sun BB	public	1	Males and Females	0	29875488	European		NA	Protein	Immune system	NA
prot-a-2101	Neurensin-1	3301	10534735	2018	NA	Sun BB	public	1	Males and Females	0	29875488	European		NA	Protein	Immune system	NA
prot-a-2103	Neurexin-1	3301	10534735	2018	NA	Sun BB	public	1	Males and Females	0	29875488	European		NA	Protein	Immune system	NA
prot-a-2104	Neurexin-2-beta	3301	10534735	2018	NA	Sun BB	public	1	Males and Females	0	29875488	European		NA	Protein	Immune system	NA
prot-a-2105	Neurexin-3-beta	3301	10534735	2018	NA	Sun BB	public	1	Males and Females	0	29875488	European		NA	Protein	Immune system	NA
prot-a-2107	Neurexin-3-beta	3301	10534735	2018	NA	Sun BB	public	1	Males and Females	0	29875488	European		NA	Protein	Immune system	NA
prot-a-2108	Sterol-4-alpha-carboxylate 3-dehydrogenase, decarboxylating	3301	10534735	2018	NA	Sun BB	public	1	Males and Females	0	29875488	European		NA	Protein	Immune system	NA
prot-a-211	Galactosylgalactosylxylosylprotein 3-beta-glucuronosyltransferase 3	3301	10534735	2018	NA	Sun BB	public	1	Males and Females	0	29875488	European		NA	Protein	Immune system	NA
prot-a-2110	Neuron-specific protein family member 1	3301	10534735	2018	NA	Sun BB	public	1	Males and Females	0	29875488	European		NA	Protein	Immune system	NA
prot-a-2112	5'(3')-deoxyribonucleotidase, cytosolic type	3301	10534735	2018	NA	Sun BB	public	1	Males and Females	0	29875488	European		NA	Protein	Immune system	NA
prot-a-2114	Neurotrophin-3	3301	10534735	2018	NA	Sun BB	public	1	Males and Females	0	29875488	European		NA	Protein	Immune system	NA
prot-a-2116	N-terminal Xaa-Pro-Lys N-methyltransferase 1	3301	10534735	2018	NA	Sun BB	public	1	Males and Females	0	29875488	European		NA	Protein	Immune system	NA
prot-a-2118	Netrin-1	3301	10534735	2018	NA	Sun BB	public	1	Males and Females	0	29875488	European		NA	Protein	Immune system	NA
prot-a-2119	Netrin-4	3301	10534735	2018	NA	Sun BB	public	1	Males and Females	0	29875488	European		NA	Protein	Immune system	NA
prot-a-212	Beta-1,4-glucuronyltransferase 1	3301	10534735	2018	NA	Sun BB	public	1	Males and Females	0	29875488	European		NA	Protein	Immune system	NA
prot-a-2120	Netrin-G1	3301	10534735	2018	NA	Sun BB	public	1	Males and Females	0	29875488	European		NA	Protein	Immune system	NA
prot-a-2126	Peroxisomal NADH pyrophosphatase NUDT12	3301	10534735	2018	NA	Sun BB	public	1	Males and Females	0	29875488	European		NA	Protein	Immune system	NA
prot-a-2127	Protein syndesmos	3301	10534735	2018	NA	Sun BB	public	1	Males and Females	0	29875488	European		NA	Protein	Immune system	NA
prot-a-2128	Nucleoside diphosphate-linked moiety X motif 8, mitochondrial	3301	10534735	2018	NA	Sun BB	public	1	Males and Females	0	29875488	European		NA	Protein	Immune system	NA
prot-a-2129	ADP-ribose pyrophosphatase, mitochondrial	3301	10534735	2018	NA	Sun BB	public	1	Males and Females	0	29875488	European		NA	Protein	Immune system	NA
prot-a-213	N-acetyllactosaminide beta-1,3-N-acetylglucosaminyltransferase 2	3301	10534735	2018	NA	Sun BB	public	1	Males and Females	0	29875488	European		NA	Protein	Immune system	NA
prot-a-2131	Nuclear RNA export factor 1	3301	10534735	2018	NA	Sun BB	public	1	Males and Females	0	29875488	European		NA	Protein	Immune system	NA
prot-a-2132	Neurexophilin-1	3301	10534735	2018	NA	Sun BB	public	1	Males and Females	0	29875488	European		NA	Protein	Immune system	NA
prot-a-2135	Out at first protein homolog	3301	10534735	2018	NA	Sun BB	public	1	Males and Females	0	29875488	European		NA	Protein	Immune system	NA
prot-a-2136	2'-5'-oligoadenylate synthase 1	3301	10534735	2018	NA	Sun BB	public	1	Males and Females	0	29875488	European		NA	Protein	Immune system	NA
prot-a-2139	Odorant-binding protein 2b	3301	10534735	2018	NA	Sun BB	public	1	Males and Females	0	29875488	European		NA	Protein	Immune system	NA
prot-a-214	UDP-GlcNAc:betaGal beta-1,3-N-acetylglucosaminyltransferase 6	3301	10534735	2018	NA	Sun BB	public	1	Males and Females	0	29875488	European		NA	Protein	Immune system	NA
prot-a-2140	OCIA domain-containing protein 1	3301	10534735	2018	NA	Sun BB	public	1	Males and Females	0	29875488	European		NA	Protein	Immune system	NA
prot-a-2141	Inositol polyphosphate 5-phosphatase OCRL-1	3301	10534735	2018	NA	Sun BB	public	1	Males and Females	0	29875488	European		NA	Protein	Immune system	NA
prot-a-2142	Ornithine decarboxylase	3301	10534735	2018	NA	Sun BB	public	1	Males and Females	0	29875488	European		NA	Protein	Immune system	NA
prot-a-2143	Obg-like ATPase 1	3301	10534735	2018	NA	Sun BB	public	1	Males and Females	0	29875488	European		NA	Protein	Immune system	NA
prot-a-2145	Olfactomedin-like protein 3	3301	10534735	2018	NA	Sun BB	public	1	Males and Females	0	29875488	European		NA	Protein	Immune system	NA
prot-a-2146	Oxidized low-density lipoprotein receptor 1	3301	10534735	2018	NA	Sun BB	public	1	Males and Females	0	29875488	European		NA	Protein	Immune system	NA
prot-a-2148	Opalin	3301	10534735	2018	NA	Sun BB	public	1	Males and Females	0	29875488	European		NA	Protein	Immune system	NA
prot-a-215	UDP-GlcNAc:betaGal beta-1,3-N-acetylglucosaminyltransferase 8	3301	10534735	2018	NA	Sun BB	public	1	Males and Females	0	29875488	European		NA	Protein	Immune system	NA
prot-a-2151	Origin recognition complex subunit 6	3301	10534735	2018	NA	Sun BB	public	1	Males and Females	0	29875488	European		NA	Protein	Immune system	NA
prot-a-2152	Oxysterol-binding protein-related protein 11	3301	10534735	2018	NA	Sun BB	public	1	Males and Females	0	29875488	European		NA	Protein	Immune system	NA
prot-a-2153	Osteoclast-associated immunoglobulin-like receptor	3301	10534735	2018	NA	Sun BB	public	1	Males and Females	0	29875488	European		NA	Protein	Immune system	NA
prot-a-2155	Oncostatin-M	3301	10534735	2018	NA	Sun BB	public	1	Males and Females	0	29875488	European		NA	Protein	Immune system	NA
prot-a-2156	Oncostatin-M-specific receptor subunit beta	3301	10534735	2018	NA	Sun BB	public	1	Males and Females	0	29875488	European		NA	Protein	Immune system	NA
prot-a-2159	Oxytocin-neurophysin 1	3301	10534735	2018	NA	Sun BB	public	1	Males and Females	0	29875488	European		NA	Protein	Immune system	NA
prot-a-216	Beta-1,4-galactosyltransferase 1	3301	10534735	2018	NA	Sun BB	public	1	Males and Females	0	29875488	European		NA	Protein	Immune system	NA
prot-a-2160	P2X purinoceptor 6	3301	10534735	2018	NA	Sun BB	public	1	Males and Females	0	29875488	European		NA	Protein	Immune system	NA
prot-a-2162	Prolyl 4-hydroxylase subunit alpha-2	3301	10534735	2018	NA	Sun BB	public	1	Males and Females	0	29875488	European		NA	Protein	Immune system	NA
prot-a-2163	Polyadenylate-binding protein 3	3301	10534735	2018	NA	Sun BB	public	1	Males and Females	0	29875488	European		NA	Protein	Immune system	NA
prot-a-2164	Polyadenylate-binding protein 4	3301	10534735	2018	NA	Sun BB	public	1	Males and Females	0	29875488	European		NA	Protein	Immune system	NA
prot-a-2166	Platelet-activating factor acetylhydrolase IB subunit beta	3301	10534735	2018	NA	Sun BB	public	1	Males and Females	0	29875488	European		NA	Protein	Immune system	NA
prot-a-2167	Multifunctional protein ADE2	3301	10534735	2018	NA	Sun BB	public	1	Males and Females	0	29875488	European		NA	Protein	Immune system	NA
prot-a-2168	Polyadenylate-binding protein-interacting protein 1	3301	10534735	2018	NA	Sun BB	public	1	Males and Females	0	29875488	European		NA	Protein	Immune system	NA
prot-a-2169	Serine/threonine-protein kinase PAK 3	3301	10534735	2018	NA	Sun BB	public	1	Males and Females	0	29875488	European		NA	Protein	Immune system	NA
prot-a-2170	Serine/threonine-protein kinase PAK 4	3301	10534735	2018	NA	Sun BB	public	1	Males and Females	0	29875488	European		NA	Protein	Immune system	NA
prot-a-2171	Serine/threonine-protein kinase PAK 7	3301	10534735	2018	NA	Sun BB	public	1	Males and Females	0	29875488	European		NA	Protein	Immune system	NA
prot-a-2172	Peptidyl-glycine alpha-amidating monooxygenase	3301	10534735	2018	NA	Sun BB	public	1	Males and Females	0	29875488	European		NA	Protein	Immune system	NA
prot-a-2177	Pappalysin-1	3301	10534735	2018	NA	Sun BB	public	1	Males and Females	0	29875488	European		NA	Protein	Immune system	NA
prot-a-2180	Protein deglycase DJ-1	3301	10534735	2018	NA	Sun BB	public	1	Males and Females	0	29875488	European		NA	Protein	Immune system	NA
prot-a-2181	Protein deglycase DJ-1	3301	10534735	2018	NA	Sun BB	public	1	Males and Females	0	29875488	European		NA	Protein	Immune system	NA
prot-a-2184	Mono [ADP-ribose] polymerase PARP16	3301	10534735	2018	NA	Sun BB	public	1	Males and Females	0	29875488	European		NA	Protein	Immune system	NA
prot-a-2189	PAX-interacting protein 1	3301	10534735	2018	NA	Sun BB	public	1	Males and Females	0	29875488	European		NA	Protein	Immune system	NA
prot-a-2191	Pterin-4-alpha-carbinolamine dehydratase	3301	10534735	2018	NA	Sun BB	public	1	Males and Females	0	29875488	European		NA	Protein	Immune system	NA
prot-a-2193	Poly(rC)-binding protein 1	3301	10534735	2018	NA	Sun BB	public	1	Males and Females	0	29875488	European		NA	Protein	Immune system	NA
prot-a-2194	Protocadherin-10	3301	10534735	2018	NA	Sun BB	public	1	Males and Females	0	29875488	European		NA	Protein	Immune system	NA
prot-a-2195	Protocadherin-10	3301	10534735	2018	NA	Sun BB	public	1	Males and Females	0	29875488	European		NA	Protein	Immune system	NA
prot-a-2199	Protocadherin alpha-4	3301	10534735	2018	NA	Sun BB	public	1	Males and Females	0	29875488	European		NA	Protein	Immune system	NA
prot-a-22	Activin receptor type-1B	3301	10534735	2018	NA	Sun BB	public	1	Males and Females	0	29875488	European		NA	Protein	Immune system	NA
prot-a-220	Beta-1,4-galactosyltransferase 6	3301	10534735	2018	NA	Sun BB	public	1	Males and Females	0	29875488	European		NA	Protein	Immune system	NA
prot-a-2200	Protocadherin alpha-7	3301	10534735	2018	NA	Sun BB	public	1	Males and Females	0	29875488	European		NA	Protein	Immune system	NA
prot-a-2205	Protocadherin beta-4	3301	10534735	2018	NA	Sun BB	public	1	Males and Females	0	29875488	European		NA	Protein	Immune system	NA
prot-a-2206	Protocadherin gamma-A8	3301	10534735	2018	NA	Sun BB	public	1	Males and Females	0	29875488	European		NA	Protein	Immune system	NA
prot-a-2207	Protocadherin gamma-C5	3301	10534735	2018	NA	Sun BB	public	1	Males and Females	0	29875488	European		NA	Protein	Immune system	NA
prot-a-2209	Procollagen C-endopeptidase enhancer 1	3301	10534735	2018	NA	Sun BB	public	1	Males and Females	0	29875488	European		NA	Protein	Immune system	NA
prot-a-2211	Neuroendocrine convertase 1	3301	10534735	2018	NA	Sun BB	public	1	Males and Females	0	29875488	European		NA	Protein	Immune system	NA
prot-a-2212	Proprotein convertase subtilisin/kexin type 7	3301	10534735	2018	NA	Sun BB	public	1	Males and Females	0	29875488	European		NA	Protein	Immune system	NA
prot-a-2213	Prenylcysteine oxidase-like	3301	10534735	2018	NA	Sun BB	public	1	Males and Females	0	29875488	European		NA	Protein	Immune system	NA
prot-a-2214	Programmed cell death protein 1	3301	10534735	2018	NA	Sun BB	public	1	Males and Females	0	29875488	European		NA	Protein	Immune system	NA
prot-a-2215	Programmed cell death 1 ligand 2	3301	10534735	2018	NA	Sun BB	public	1	Males and Females	0	29875488	European		NA	Protein	Immune system	NA
prot-a-2216	Programmed cell death protein 5	3301	10534735	2018	NA	Sun BB	public	1	Males and Females	0	29875488	European		NA	Protein	Immune system	NA
prot-a-2218	Calcium/calmodulin-dependent 3',5'-cyclic nucleotide phosphodiesterase 1A	3301	10534735	2018	NA	Sun BB	public	1	Males and Females	0	29875488	European		NA	Protein	Immune system	NA
prot-a-222	Transcription regulator protein BACH1	3301	10534735	2018	NA	Sun BB	public	1	Males and Females	0	29875488	European		NA	Protein	Immune system	NA
prot-a-2221	cAMP-specific 3',5'-cyclic phosphodiesterase 4D	3301	10534735	2018	NA	Sun BB	public	1	Males and Females	0	29875488	European		NA	Protein	Immune system	NA
prot-a-2222	Retinal rod rhodopsin-sensitive cGMP 3',5'-cyclic phosphodiesterase subunit delta	3301	10534735	2018	NA	Sun BB	public	1	Males and Females	0	29875488	European		NA	Protein	Immune system	NA
prot-a-2226	Platelet-derived growth factor subunit B	3301	10534735	2018	NA	Sun BB	public	1	Males and Females	0	29875488	European		NA	Protein	Immune system	NA
prot-a-2229	Platelet-derived growth factor receptor alpha	3301	10534735	2018	NA	Sun BB	public	1	Males and Females	0	29875488	European		NA	Protein	Immune system	NA
prot-a-2230	Platelet-derived growth factor receptor beta	3301	10534735	2018	NA	Sun BB	public	1	Males and Females	0	29875488	European		NA	Protein	Immune system	NA
prot-a-2231	Platelet-derived growth factor receptor-like protein	3301	10534735	2018	NA	Sun BB	public	1	Males and Females	0	29875488	European		NA	Protein	Immune system	NA
prot-a-2233	Protein disulfide-isomerase A5	3301	10534735	2018	NA	Sun BB	public	1	Males and Females	0	29875488	European		NA	Protein	Immune system	NA
prot-a-2235	[Pyruvate dehydrogenase (acetyl-transferring)] kinase isozyme 1, mitochondrial	3301	10534735	2018	NA	Sun BB	public	1	Males and Females	0	29875488	European		NA	Protein	Immune system	NA
prot-a-224	Bcl2-associated agonist of cell death	3301	10534735	2018	NA	Sun BB	public	1	Males and Females	0	29875488	European		NA	Protein	Immune system	NA
prot-a-2242	PDZK1-interacting protein 1	3301	10534735	2018	NA	Sun BB	public	1	Males and Females	0	29875488	European		NA	Protein	Immune system	NA
prot-a-2243	Platelet endothelial aggregation receptor 1	3301	10534735	2018	NA	Sun BB	public	1	Males and Females	0	29875488	European		NA	Protein	Immune system	NA
prot-a-2245	Platelet endothelial cell adhesion molecule	3301	10534735	2018	NA	Sun BB	public	1	Males and Females	0	29875488	European		NA	Protein	Immune system	NA
prot-a-2246	E3 ubiquitin-protein ligase pellino homolog 2	3301	10534735	2018	NA	Sun BB	public	1	Males and Females	0	29875488	European		NA	Protein	Immune system	NA
prot-a-2247	Proenkephalin-A	3301	10534735	2018	NA	Sun BB	public	1	Males and Females	0	29875488	European		NA	Protein	Immune system	NA
prot-a-225	BAG family molecular chaperone regulator 3	3301	10534735	2018	NA	Sun BB	public	1	Males and Females	0	29875488	European		NA	Protein	Immune system	NA
prot-a-2250	Peroxisomal targeting signal 1 receptor	3301	10534735	2018	NA	Sun BB	public	1	Males and Females	0	29875488	European		NA	Protein	Immune system	NA
prot-a-2251	Platelet factor 4 variant	3301	10534735	2018	NA	Sun BB	public	1	Males and Females	0	29875488	European		NA	Protein	Immune system	NA
prot-a-2255	Phosphoglycerate kinase 1	3301	10534735	2018	NA	Sun BB	public	1	Males and Females	0	29875488	European		NA	Protein	Immune system	NA
prot-a-2258	Phosphoglucomutase-1	3301	10534735	2018	NA	Sun BB	public	1	Males and Females	0	29875488	European		NA	Protein	Immune system	NA
prot-a-2259	Membrane-associated progesterone receptor component 1	3301	10534735	2018	NA	Sun BB	public	1	Males and Females	0	29875488	European		NA	Protein	Immune system	NA
prot-a-2260	Membrane-associated progesterone receptor component 2	3301	10534735	2018	NA	Sun BB	public	1	Males and Females	0	29875488	European		NA	Protein	Immune system	NA
prot-a-2261	Membrane-associated progesterone receptor component 2	3301	10534735	2018	NA	Sun BB	public	1	Males and Females	0	29875488	European		NA	Protein	Immune system	NA
prot-a-2262	Membrane-associated progesterone receptor component 2	3301	10534735	2018	NA	Sun BB	public	1	Males and Females	0	29875488	European		NA	Protein	Immune system	NA
prot-a-2264	Peptidase inhibitor 15	3301	10534735	2018	NA	Sun BB	public	1	Males and Females	0	29875488	European		NA	Protein	Immune system	NA
prot-a-2265	Elafin	3301	10534735	2018	NA	Sun BB	public	1	Males and Females	0	29875488	European		NA	Protein	Immune system	NA
prot-a-2267	PILR alpha-associated neural protein	3301	10534735	2018	NA	Sun BB	public	1	Males and Females	0	29875488	European		NA	Protein	Immune system	NA
prot-a-2269	Phosphatidylinositol 4-phosphate 3-kinase C2 domain-containing subunit alpha	3301	10534735	2018	NA	Sun BB	public	1	Males and Females	0	29875488	European		NA	Protein	Immune system	NA
prot-a-2270	PIK3CA/PIK3R1	3301	10534735	2018	NA	Sun BB	public	1	Males and Females	0	29875488	European		NA	Protein	Immune system	NA
prot-a-2271	Phosphatidylinositol 4,5-bisphosphate 3-kinase catalytic subunit gamma isoform	3301	10534735	2018	NA	Sun BB	public	1	Males and Females	0	29875488	European		NA	Protein	Immune system	NA
prot-a-2272	Paired immunoglobulin-like type 2 receptor alpha	3301	10534735	2018	NA	Sun BB	public	1	Males and Females	0	29875488	European		NA	Protein	Immune system	NA
prot-a-2275	Peptidyl-prolyl cis-trans isomerase NIMA-interacting 4	3301	10534735	2018	NA	Sun BB	public	1	Males and Females	0	29875488	European		NA	Protein	Immune system	NA
prot-a-2277	Pirin	3301	10534735	2018	NA	Sun BB	public	1	Males and Females	0	29875488	European		NA	Protein	Immune system	NA
prot-a-2279	Phosphatidylinositol transfer protein beta isoform	3301	10534735	2018	NA	Sun BB	public	1	Males and Females	0	29875488	European		NA	Protein	Immune system	NA
prot-a-228	B melanoma antigen 3	3301	10534735	2018	NA	Sun BB	public	1	Males and Females	0	29875488	European		NA	Protein	Immune system	NA
prot-a-2281	Polycystin-2	3301	10534735	2018	NA	Sun BB	public	1	Males and Females	0	29875488	European		NA	Protein	Immune system	NA
prot-a-2282	Pyruvate kinase PKLR	3301	10534735	2018	NA	Sun BB	public	1	Males and Females	0	29875488	European		NA	Protein	Immune system	NA
prot-a-2283	Group 10 secretory phospholipase A2	3301	10534735	2018	NA	Sun BB	public	1	Males and Females	0	29875488	European		NA	Protein	Immune system	NA
prot-a-2284	Group XIIB secretory phospholipase A2-like protein	3301	10534735	2018	NA	Sun BB	public	1	Males and Females	0	29875488	European		NA	Protein	Immune system	NA
prot-a-2286	Phospholipase A2, membrane associated	3301	10534735	2018	NA	Sun BB	public	1	Males and Females	0	29875488	European		NA	Protein	Immune system	NA
prot-a-2289	Group IIE secretory phospholipase A2	3301	10534735	2018	NA	Sun BB	public	1	Males and Females	0	29875488	European		NA	Protein	Immune system	NA
prot-a-2291	Secretory phospholipase A2 receptor	3301	10534735	2018	NA	Sun BB	public	1	Males and Females	0	29875488	European		NA	Protein	Immune system	NA
prot-a-2292	Urokinase-type plasminogen activator	3301	10534735	2018	NA	Sun BB	public	1	Males and Females	0	29875488	European		NA	Protein	Immune system	NA
prot-a-2293	Urokinase plasminogen activator surface receptor	3301	10534735	2018	NA	Sun BB	public	1	Males and Females	0	29875488	European		NA	Protein	Immune system	NA
prot-a-2296	1-phosphatidylinositol 4,5-bisphosphate phosphodiesterase gamma-1	3301	10534735	2018	NA	Sun BB	public	1	Males and Females	0	29875488	European		NA	Protein	Immune system	NA
prot-a-230	Basic leucine zipper transcriptional factor ATF-like 3	3301	10534735	2018	NA	Sun BB	public	1	Males and Females	0	29875488	European		NA	Protein	Immune system	NA
prot-a-2300	Pleckstrin homology domain-containing family A member 7	3301	10534735	2018	NA	Sun BB	public	1	Males and Females	0	29875488	European		NA	Protein	Immune system	NA
prot-a-2301	Angiostatin	3301	10534735	2018	NA	Sun BB	public	1	Males and Females	0	29875488	European		NA	Protein	Immune system	NA
prot-a-2302	Plasmin	3301	10534735	2018	NA	Sun BB	public	1	Males and Females	0	29875488	European		NA	Protein	Immune system	NA
prot-a-2304	Procollagen-lysine,2-oxoglutarate 5-dioxygenase 2	3301	10534735	2018	NA	Sun BB	public	1	Males and Females	0	29875488	European		NA	Protein	Immune system	NA
prot-a-2307	Plexin-A1	3301	10534735	2018	NA	Sun BB	public	1	Males and Females	0	29875488	European		NA	Protein	Immune system	NA
prot-a-2308	Plexin-B2	3301	10534735	2018	NA	Sun BB	public	1	Males and Females	0	29875488	European		NA	Protein	Immune system	NA
prot-a-2309	Plexin-C1	3301	10534735	2018	NA	Sun BB	public	1	Males and Females	0	29875488	European		NA	Protein	Immune system	NA
prot-a-2310	Melanocyte protein PMEL	3301	10534735	2018	NA	Sun BB	public	1	Males and Females	0	29875488	European		NA	Protein	Immune system	NA
prot-a-2311	Protein TMEPAI	3301	10534735	2018	NA	Sun BB	public	1	Males and Females	0	29875488	European		NA	Protein	Immune system	NA
prot-a-2313	Phosphomevalonate kinase	3301	10534735	2018	NA	Sun BB	public	1	Males and Females	0	29875488	European		NA	Protein	Immune system	NA
prot-a-2314	Bifunctional polynucleotide phosphatase/kinase	3301	10534735	2018	NA	Sun BB	public	1	Males and Females	0	29875488	European		NA	Protein	Immune system	NA
prot-a-2316	Purine nucleoside phosphorylase	3301	10534735	2018	NA	Sun BB	public	1	Males and Females	0	29875488	European		NA	Protein	Immune system	NA
prot-a-2318	GDP-fucose protein O-fucosyltransferase 1	3301	10534735	2018	NA	Sun BB	public	1	Males and Females	0	29875488	European		NA	Protein	Immune system	NA
prot-a-2319	GDP-fucose protein O-fucosyltransferase 2	3301	10534735	2018	NA	Sun BB	public	1	Males and Females	0	29875488	European		NA	Protein	Immune system	NA
prot-a-232	Brevican core protein	3301	10534735	2018	NA	Sun BB	public	1	Males and Females	0	29875488	European		NA	Protein	Immune system	NA
prot-a-2320	Protein O-glucosyltransferase 1	3301	10534735	2018	NA	Sun BB	public	1	Males and Females	0	29875488	European		NA	Protein	Immune system	NA
prot-a-2323	DNA-directed DNA/RNA polymerase mu	3301	10534735	2018	NA	Sun BB	public	1	Males and Females	0	29875488	European		NA	Protein	Immune system	NA
prot-a-2324	DNA-directed RNA polymerases I and III subunit RPAC1	3301	10534735	2018	NA	Sun BB	public	1	Males and Females	0	29875488	European		NA	Protein	Immune system	NA
prot-a-2325	Beta-endorphin	3301	10534735	2018	NA	Sun BB	public	1	Males and Females	0	29875488	European		NA	Protein	Immune system	NA
prot-a-2328	Protein O-linked-mannose beta-1,2-N-acetylglucosaminyltransferase 1	3301	10534735	2018	NA	Sun BB	public	1	Males and Females	0	29875488	European		NA	Protein	Immune system	NA
prot-a-2329	Protein O-linked-mannose beta-1,4-N-acetylglucosaminyltransferase 2	3301	10534735	2018	NA	Sun BB	public	1	Males and Females	0	29875488	European		NA	Protein	Immune system	NA
prot-a-2332	Periostin	3301	10534735	2018	NA	Sun BB	public	1	Males and Females	0	29875488	European		NA	Protein	Immune system	NA
prot-a-2333	Periostin	3301	10534735	2018	NA	Sun BB	public	1	Males and Females	0	29875488	European		NA	Protein	Immune system	NA
prot-a-2337	Neutrophil-activating peptide 2	3301	10534735	2018	NA	Sun BB	public	1	Males and Females	0	29875488	European		NA	Protein	Immune system	NA
prot-a-2339	Peptidyl-prolyl cis-trans isomerase A	3301	10534735	2018	NA	Sun BB	public	1	Males and Females	0	29875488	European		NA	Protein	Immune system	NA
prot-a-234	Breast cancer anti-estrogen resistance protein 3	3301	10534735	2018	NA	Sun BB	public	1	Males and Females	0	29875488	European		NA	Protein	Immune system	NA
prot-a-2340	Peptidyl-prolyl cis-trans isomerase B	3301	10534735	2018	NA	Sun BB	public	1	Males and Females	0	29875488	European		NA	Protein	Immune system	NA
prot-a-2341	Peptidyl-prolyl cis-trans isomerase E	3301	10534735	2018	NA	Sun BB	public	1	Males and Females	0	29875488	European		NA	Protein	Immune system	NA
prot-a-2342	Peptidyl-prolyl cis-trans isomerase H	3301	10534735	2018	NA	Sun BB	public	1	Males and Females	0	29875488	European		NA	Protein	Immune system	NA
prot-a-2343	Peptidyl-prolyl cis-trans isomerase-like 1	3301	10534735	2018	NA	Sun BB	public	1	Males and Females	0	29875488	European		NA	Protein	Immune system	NA
prot-a-2344	Peptidyl-prolyl cis-trans isomerase-like 2	3301	10534735	2018	NA	Sun BB	public	1	Males and Females	0	29875488	European		NA	Protein	Immune system	NA
prot-a-2346	Protein phosphatase 1L	3301	10534735	2018	NA	Sun BB	public	1	Males and Females	0	29875488	European		NA	Protein	Immune system	NA
prot-a-2349	Serine/threonine-protein phosphatase 2A regulatory subunit B'' subunit alpha	3301	10534735	2018	NA	Sun BB	public	1	Males and Females	0	29875488	European		NA	Protein	Immune system	NA
prot-a-235	B-cell lymphoma/leukemia 10	3301	10534735	2018	NA	Sun BB	public	1	Males and Females	0	29875488	European		NA	Protein	Immune system	NA
prot-a-2350	Calcineurin subunit B type 1	3301	10534735	2018	NA	Sun BB	public	1	Males and Females	0	29875488	European		NA	Protein	Immune system	NA
prot-a-2351	Palmitoyl-protein thioesterase 1	3301	10534735	2018	NA	Sun BB	public	1	Males and Females	0	29875488	European		NA	Protein	Immune system	NA
prot-a-2352	Pancreatic hormone	3301	10534735	2018	NA	Sun BB	public	1	Males and Females	0	29875488	European		NA	Protein	Immune system	NA
prot-a-2354	Basic salivary proline-rich protein 4	3301	10534735	2018	NA	Sun BB	public	1	Males and Females	0	29875488	European		NA	Protein	Immune system	NA
prot-a-2356	Lysosomal Pro-X carboxypeptidase	3301	10534735	2018	NA	Sun BB	public	1	Males and Females	0	29875488	European		NA	Protein	Immune system	NA
prot-a-2357	PR domain zinc finger protein 1	3301	10534735	2018	NA	Sun BB	public	1	Males and Females	0	29875488	European		NA	Protein	Immune system	NA
prot-a-2358	PR domain zinc finger protein 4	3301	10534735	2018	NA	Sun BB	public	1	Males and Females	0	29875488	European		NA	Protein	Immune system	NA
prot-a-2359	Peroxiredoxin-1	3301	10534735	2018	NA	Sun BB	public	1	Males and Females	0	29875488	European		NA	Protein	Immune system	NA
prot-a-2361	Prolargin	3301	10534735	2018	NA	Sun BB	public	1	Males and Females	0	29875488	European		NA	Protein	Immune system	NA
prot-a-2362	Proteoglycan 3	3301	10534735	2018	NA	Sun BB	public	1	Males and Females	0	29875488	European		NA	Protein	Immune system	NA
prot-a-2363	Salivary acidic proline-rich phosphoprotein 1/2	3301	10534735	2018	NA	Sun BB	public	1	Males and Females	0	29875488	European		NA	Protein	Immune system	NA
prot-a-2366	AMP Kinase (alpha2beta2gamma1)	3301	10534735	2018	NA	Sun BB	public	1	Males and Females	0	29875488	European		NA	Protein	Immune system	NA
prot-a-2369	Protein kinase C alpha type	3301	10534735	2018	NA	Sun BB	public	1	Males and Females	0	29875488	European		NA	Protein	Immune system	NA
prot-a-237	Bcl-2-related protein A1	3301	10534735	2018	NA	Sun BB	public	1	Males and Females	0	29875488	European		NA	Protein	Immune system	NA
prot-a-2370	Protein kinase C beta type (splice variant beta-II)	3301	10534735	2018	NA	Sun BB	public	1	Males and Females	0	29875488	European		NA	Protein	Immune system	NA
prot-a-2371	Protein kinase C iota type	3301	10534735	2018	NA	Sun BB	public	1	Males and Females	0	29875488	European		NA	Protein	Immune system	NA
prot-a-2372	Glucosidase 2 subunit beta	3301	10534735	2018	NA	Sun BB	public	1	Males and Females	0	29875488	European		NA	Protein	Immune system	NA
prot-a-2373	Protein kinase C zeta type	3301	10534735	2018	NA	Sun BB	public	1	Males and Females	0	29875488	European		NA	Protein	Immune system	NA
prot-a-2374	cGMP-dependent protein kinase 1, beta isozyme	3301	10534735	2018	NA	Sun BB	public	1	Males and Females	0	29875488	European		NA	Protein	Immune system	NA
prot-a-2377	Prolactin receptor	3301	10534735	2018	NA	Sun BB	public	1	Males and Females	0	29875488	European		NA	Protein	Immune system	NA
prot-a-2379	Major prion protein	3301	10534735	2018	NA	Sun BB	public	1	Males and Females	0	29875488	European		NA	Protein	Immune system	NA
prot-a-238	Bcl-2-like protein 1	3301	10534735	2018	NA	Sun BB	public	1	Males and Females	0	29875488	European		NA	Protein	Immune system	NA
prot-a-2380	Activated Protein C	3301	10534735	2018	NA	Sun BB	public	1	Males and Females	0	29875488	European		NA	Protein	Immune system	NA
prot-a-2382	Prokineticin-1	3301	10534735	2018	NA	Sun BB	public	1	Males and Females	0	29875488	European		NA	Protein	Immune system	NA
prot-a-2384	Pre-mRNA-processing factor 6	3301	10534735	2018	NA	Sun BB	public	1	Males and Females	0	29875488	European		NA	Protein	Immune system	NA
prot-a-2385	Phosphoribosyl pyrophosphate synthase-associated protein 1	3301	10534735	2018	NA	Sun BB	public	1	Males and Females	0	29875488	European		NA	Protein	Immune system	NA
prot-a-2386	Protein Largen	3301	10534735	2018	NA	Sun BB	public	1	Males and Females	0	29875488	European		NA	Protein	Immune system	NA
prot-a-2388	Transmembrane gamma-carboxyglutamic acid protein 1	3301	10534735	2018	NA	Sun BB	public	1	Males and Females	0	29875488	European		NA	Protein	Immune system	NA
prot-a-2391	Brain-specific serine protease 4	3301	10534735	2018	NA	Sun BB	public	1	Males and Females	0	29875488	European		NA	Protein	Immune system	NA
prot-a-2392	Trypsin-2	3301	10534735	2018	NA	Sun BB	public	1	Males and Females	0	29875488	European		NA	Protein	Immune system	NA
prot-a-2393	Trypsin-3	3301	10534735	2018	NA	Sun BB	public	1	Males and Females	0	29875488	European		NA	Protein	Immune system	NA
prot-a-2395	Myeloblastin	3301	10534735	2018	NA	Sun BB	public	1	Males and Females	0	29875488	European		NA	Protein	Immune system	NA
prot-a-2396	Myeloblastin	3301	10534735	2018	NA	Sun BB	public	1	Males and Females	0	29875488	European		NA	Protein	Immune system	NA
prot-a-2397	Proactivator polypeptide-like 1	3301	10534735	2018	NA	Sun BB	public	1	Males and Females	0	29875488	European		NA	Protein	Immune system	NA
prot-a-2398	PH and SEC7 domain-containing protein 1	3301	10534735	2018	NA	Sun BB	public	1	Males and Females	0	29875488	European		NA	Protein	Immune system	NA
prot-a-2399	PH and SEC7 domain-containing protein 2	3301	10534735	2018	NA	Sun BB	public	1	Males and Females	0	29875488	European		NA	Protein	Immune system	NA
prot-a-24	Acylphosphatase-2	3301	10534735	2018	NA	Sun BB	public	1	Males and Females	0	29875488	European		NA	Protein	Immune system	NA
prot-a-2401	Pregnancy-specific beta-1-glycoprotein 2	3301	10534735	2018	NA	Sun BB	public	1	Males and Females	0	29875488	European		NA	Protein	Immune system	NA
prot-a-2402	Pregnancy-specific beta-1-glycoprotein 3	3301	10534735	2018	NA	Sun BB	public	1	Males and Females	0	29875488	European		NA	Protein	Immune system	NA
prot-a-2404	Pregnancy-specific beta-1-glycoprotein 5	3301	10534735	2018	NA	Sun BB	public	1	Males and Females	0	29875488	European		NA	Protein	Immune system	NA
prot-a-2408	Pregnancy-specific beta-1-glycoprotein 9	3301	10534735	2018	NA	Sun BB	public	1	Males and Females	0	29875488	European		NA	Protein	Immune system	NA
prot-a-2410	Proteasome subunit alpha type-1	3301	10534735	2018	NA	Sun BB	public	1	Males and Females	0	29875488	European		NA	Protein	Immune system	NA
prot-a-2418	26S proteasome non-ATPase regulatory subunit 5	3301	10534735	2018	NA	Sun BB	public	1	Males and Females	0	29875488	European		NA	Protein	Immune system	NA
prot-a-2420	Proteasome activator complex subunit 1	3301	10534735	2018	NA	Sun BB	public	1	Males and Females	0	29875488	European		NA	Protein	Immune system	NA
prot-a-2423	Persephin	3301	10534735	2018	NA	Sun BB	public	1	Males and Females	0	29875488	European		NA	Protein	Immune system	NA
prot-a-2425	Phosphatidylinositol 3,4,5-trisphosphate 3-phosphatase and dual-specificity protein phosphatase PTEN	3301	10534735	2018	NA	Sun BB	public	1	Males and Females	0	29875488	European		NA	Protein	Immune system	NA
prot-a-2426	Prostaglandin-H2 D-isomerase	3301	10534735	2018	NA	Sun BB	public	1	Males and Females	0	29875488	European		NA	Protein	Immune system	NA
prot-a-2427	Prostaglandin F2 receptor negative regulator	3301	10534735	2018	NA	Sun BB	public	1	Males and Females	0	29875488	European		NA	Protein	Immune system	NA
prot-a-2428	Prostaglandin reductase 1	3301	10534735	2018	NA	Sun BB	public	1	Males and Females	0	29875488	European		NA	Protein	Immune system	NA
prot-a-243	Transcription factor TFIIIB component B'' homolog	3301	10534735	2018	NA	Sun BB	public	1	Males and Females	0	29875488	European		NA	Protein	Immune system	NA
prot-a-2432	Parathyroid hormone-related protein	3301	10534735	2018	NA	Sun BB	public	1	Males and Females	0	29875488	European		NA	Protein	Immune system	NA
prot-a-2433	Protein-tyrosine kinase 2-beta	3301	10534735	2018	NA	Sun BB	public	1	Males and Females	0	29875488	European		NA	Protein	Immune system	NA
prot-a-2435	Pleiotrophin	3301	10534735	2018	NA	Sun BB	public	1	Males and Females	0	29875488	European		NA	Protein	Immune system	NA
prot-a-2438	Tyrosine-protein phosphatase non-receptor type 1	3301	10534735	2018	NA	Sun BB	public	1	Males and Females	0	29875488	European		NA	Protein	Immune system	NA
prot-a-2440	Tyrosine-protein phosphatase non-receptor type 4	3301	10534735	2018	NA	Sun BB	public	1	Males and Females	0	29875488	European		NA	Protein	Immune system	NA
prot-a-2441	Tyrosine-protein phosphatase non-receptor type 7	3301	10534735	2018	NA	Sun BB	public	1	Males and Females	0	29875488	European		NA	Protein	Immune system	NA
prot-a-2444	Receptor-type tyrosine-protein phosphatase H	3301	10534735	2018	NA	Sun BB	public	1	Males and Females	0	29875488	European		NA	Protein	Immune system	NA
prot-a-2446	Receptor-type tyrosine-protein phosphatase eta	3301	10534735	2018	NA	Sun BB	public	1	Males and Females	0	29875488	European		NA	Protein	Immune system	NA
prot-a-2449	Receptor-type tyrosine-protein phosphatase U	3301	10534735	2018	NA	Sun BB	public	1	Males and Females	0	29875488	European		NA	Protein	Immune system	NA
prot-a-245	BET1-like protein	3301	10534735	2018	NA	Sun BB	public	1	Males and Females	0	29875488	European		NA	Protein	Immune system	NA
prot-a-2450	6-pyruvoyl tetrahydrobiopterin synthase	3301	10534735	2018	NA	Sun BB	public	1	Males and Females	0	29875488	European		NA	Protein	Immune system	NA
prot-a-2452	Poly(U)-binding-splicing factor PUF60	3301	10534735	2018	NA	Sun BB	public	1	Males and Females	0	29875488	European		NA	Protein	Immune system	NA
prot-a-2453	Transcriptional activator protein Pur-alpha	3301	10534735	2018	NA	Sun BB	public	1	Males and Females	0	29875488	European		NA	Protein	Immune system	NA
prot-a-246	Osteocalcin	3301	10534735	2018	NA	Sun BB	public	1	Males and Females	0	29875488	European		NA	Protein	Immune system	NA
prot-a-2462	Glycogen phosphorylase, liver form	3301	10534735	2018	NA	Sun BB	public	1	Males and Females	0	29875488	European		NA	Protein	Immune system	NA
prot-a-2464	Dihydropteridine reductase	3301	10534735	2018	NA	Sun BB	public	1	Males and Females	0	29875488	European		NA	Protein	Immune system	NA
prot-a-2465	Glutaminyl-peptide cyclotransferase	3301	10534735	2018	NA	Sun BB	public	1	Males and Females	0	29875488	European		NA	Protein	Immune system	NA
prot-a-2466	Glutaminyl-peptide cyclotransferase-like protein	3301	10534735	2018	NA	Sun BB	public	1	Males and Females	0	29875488	European		NA	Protein	Immune system	NA
prot-a-2468	Sulfhydryl oxidase 1	3301	10534735	2018	NA	Sun BB	public	1	Males and Females	0	29875488	European		NA	Protein	Immune system	NA
prot-a-2469	Sulfhydryl oxidase 1	3301	10534735	2018	NA	Sun BB	public	1	Males and Females	0	29875488	European		NA	Protein	Immune system	NA
prot-a-247	Biglycan	3301	10534735	2018	NA	Sun BB	public	1	Males and Females	0	29875488	European		NA	Protein	Immune system	NA
prot-a-2471	Ras-related protein Rab-14	3301	10534735	2018	NA	Sun BB	public	1	Males and Females	0	29875488	European		NA	Protein	Immune system	NA
prot-a-2473	Ras-related protein Rab-26	3301	10534735	2018	NA	Sun BB	public	1	Males and Females	0	29875488	European		NA	Protein	Immune system	NA
prot-a-2474	Ras-related protein Rab-27A	3301	10534735	2018	NA	Sun BB	public	1	Males and Females	0	29875488	European		NA	Protein	Immune system	NA
prot-a-2476	Ras-related protein Rab-35	3301	10534735	2018	NA	Sun BB	public	1	Males and Females	0	29875488	European		NA	Protein	Immune system	NA
prot-a-2477	Ras-related protein Rab-39B	3301	10534735	2018	NA	Sun BB	public	1	Males and Females	0	29875488	European		NA	Protein	Immune system	NA
prot-a-2479	Rab9 effector protein with kelch motifs	3301	10534735	2018	NA	Sun BB	public	1	Males and Females	0	29875488	European		NA	Protein	Immune system	NA
prot-a-2480	Ras-related C3 botulinum toxin substrate 3	3301	10534735	2018	NA	Sun BB	public	1	Males and Females	0	29875488	European		NA	Protein	Immune system	NA
prot-a-2481	Rac GTPase-activating protein 1	3301	10534735	2018	NA	Sun BB	public	1	Males and Females	0	29875488	European		NA	Protein	Immune system	NA
prot-a-2483	UV excision repair protein RAD23 homolog A	3301	10534735	2018	NA	Sun BB	public	1	Males and Females	0	29875488	European		NA	Protein	Immune system	NA
prot-a-2484	UV excision repair protein RAD23 homolog B	3301	10534735	2018	NA	Sun BB	public	1	Males and Females	0	29875488	European		NA	Protein	Immune system	NA
prot-a-2485	DNA repair protein RAD51 homolog 1	3301	10534735	2018	NA	Sun BB	public	1	Males and Females	0	29875488	European		NA	Protein	Immune system	NA
prot-a-2486	DNA repair protein RAD51 homolog 4	3301	10534735	2018	NA	Sun BB	public	1	Males and Females	0	29875488	European		NA	Protein	Immune system	NA
prot-a-2487	NKG2D ligand 4	3301	10534735	2018	NA	Sun BB	public	1	Males and Females	0	29875488	European		NA	Protein	Immune system	NA
prot-a-2492	Rap guanine nucleotide exchange factor 5	3301	10534735	2018	NA	Sun BB	public	1	Males and Females	0	29875488	European		NA	Protein	Immune system	NA
prot-a-2493	Retinoic acid receptor responder protein 1	3301	10534735	2018	NA	Sun BB	public	1	Males and Females	0	29875488	European		NA	Protein	Immune system	NA
prot-a-2494	Retinoic acid receptor responder protein 3	3301	10534735	2018	NA	Sun BB	public	1	Males and Females	0	29875488	European		NA	Protein	Immune system	NA
prot-a-2495	Ras GTPase-activating protein 1	3301	10534735	2018	NA	Sun BB	public	1	Males and Females	0	29875488	European		NA	Protein	Immune system	NA
prot-a-2497	Retinoblastoma-binding protein 5	3301	10534735	2018	NA	Sun BB	public	1	Males and Females	0	29875488	European		NA	Protein	Immune system	NA
prot-a-2498	E3 ubiquitin-protein ligase RBBP6	3301	10534735	2018	NA	Sun BB	public	1	Males and Females	0	29875488	European		NA	Protein	Immune system	NA
prot-a-25	Disintegrin and metalloproteinase domain-containing protein 11	3301	10534735	2018	NA	Sun BB	public	1	Males and Females	0	29875488	European		NA	Protein	Immune system	NA
prot-a-250	Myc box-dependent-interacting protein 1	3301	10534735	2018	NA	Sun BB	public	1	Males and Females	0	29875488	European		NA	Protein	Immune system	NA
prot-a-2501	Probable RNA-binding protein 19	3301	10534735	2018	NA	Sun BB	public	1	Males and Females	0	29875488	European		NA	Protein	Immune system	NA
prot-a-2503	RNA-binding protein 24	3301	10534735	2018	NA	Sun BB	public	1	Males and Females	0	29875488	European		NA	Protein	Immune system	NA
prot-a-2505	RNA-binding protein 3	3301	10534735	2018	NA	Sun BB	public	1	Males and Females	0	29875488	European		NA	Protein	Immune system	NA
prot-a-2506	RNA-binding protein 39	3301	10534735	2018	NA	Sun BB	public	1	Males and Females	0	29875488	European		NA	Protein	Immune system	NA
prot-a-2507	Retinol-binding protein 4	3301	10534735	2018	NA	Sun BB	public	1	Males and Females	0	29875488	European		NA	Protein	Immune system	NA
prot-a-2508	Retinoid-binding protein 7	3301	10534735	2018	NA	Sun BB	public	1	Males and Females	0	29875488	European		NA	Protein	Immune system	NA
prot-a-2509	Calcipressin-1	3301	10534735	2018	NA	Sun BB	public	1	Males and Females	0	29875488	European		NA	Protein	Immune system	NA
prot-a-2515	Regenerating islet-derived protein 4	3301	10534735	2018	NA	Sun BB	public	1	Males and Females	0	29875488	European		NA	Protein	Immune system	NA
prot-a-2516	Transcription factor RelB	3301	10534735	2018	NA	Sun BB	public	1	Males and Females	0	29875488	European		NA	Protein	Immune system	NA
prot-a-2517	RELT-like protein 1	3301	10534735	2018	NA	Sun BB	public	1	Males and Females	0	29875488	European		NA	Protein	Immune system	NA
prot-a-2519	Tumor necrosis factor receptor superfamily member 19L	3301	10534735	2018	NA	Sun BB	public	1	Males and Females	0	29875488	European		NA	Protein	Immune system	NA
prot-a-252	Baculoviral IAP repeat-containing protein 5	3301	10534735	2018	NA	Sun BB	public	1	Males and Females	0	29875488	European		NA	Protein	Immune system	NA
prot-a-2520	Tumor necrosis factor receptor superfamily member 19L	3301	10534735	2018	NA	Sun BB	public	1	Males and Females	0	29875488	European		NA	Protein	Immune system	NA
prot-a-2522	Replication initiator 1	3301	10534735	2018	NA	Sun BB	public	1	Males and Females	0	29875488	European		NA	Protein	Immune system	NA
prot-a-2523	Proto-oncogene tyrosine-protein kinase receptor Ret	3301	10534735	2018	NA	Sun BB	public	1	Males and Females	0	29875488	European		NA	Protein	Immune system	NA
prot-a-2524	Resistin	3301	10534735	2018	NA	Sun BB	public	1	Males and Females	0	29875488	European		NA	Protein	Immune system	NA
prot-a-2525	All-trans-retinol 13,14-reductase	3301	10534735	2018	NA	Sun BB	public	1	Males and Females	0	29875488	European		NA	Protein	Immune system	NA
prot-a-2527	Rieske domain-containing protein	3301	10534735	2018	NA	Sun BB	public	1	Males and Females	0	29875488	European		NA	Protein	Immune system	NA
prot-a-253	Biliverdin reductase A	3301	10534735	2018	NA	Sun BB	public	1	Males and Females	0	29875488	European		NA	Protein	Immune system	NA
prot-a-2530	Beta-1,3-N-acetylglucosaminyltransferase radical fringe	3301	10534735	2018	NA	Sun BB	public	1	Males and Females	0	29875488	European		NA	Protein	Immune system	NA
prot-a-2532	Repulsive guidance molecule A	3301	10534735	2018	NA	Sun BB	public	1	Males and Females	0	29875488	European		NA	Protein	Immune system	NA
prot-a-2533	RGM domain family member B	3301	10534735	2018	NA	Sun BB	public	1	Males and Females	0	29875488	European		NA	Protein	Immune system	NA
prot-a-2535	Regulator of G-protein signaling 18	3301	10534735	2018	NA	Sun BB	public	1	Males and Females	0	29875488	European		NA	Protein	Immune system	NA
prot-a-2536	Regulator of G-protein signaling 19	3301	10534735	2018	NA	Sun BB	public	1	Males and Females	0	29875488	European		NA	Protein	Immune system	NA
prot-a-2538	Regulator of G-protein signaling 8	3301	10534735	2018	NA	Sun BB	public	1	Males and Females	0	29875488	European		NA	Protein	Immune system	NA
prot-a-2539	Transforming protein RhoA	3301	10534735	2018	NA	Sun BB	public	1	Males and Females	0	29875488	European		NA	Protein	Immune system	NA
prot-a-2542	Rhophilin-2	3301	10534735	2018	NA	Sun BB	public	1	Males and Females	0	29875488	European		NA	Protein	Immune system	NA
prot-a-2543	Protein RIC-3	3301	10534735	2018	NA	Sun BB	public	1	Males and Females	0	29875488	European		NA	Protein	Immune system	NA
prot-a-2544	Protein RIC-3	3301	10534735	2018	NA	Sun BB	public	1	Males and Females	0	29875488	European		NA	Protein	Immune system	NA
prot-a-2548	Retinaldehyde-binding protein 1	3301	10534735	2018	NA	Sun BB	public	1	Males and Females	0	29875488	European		NA	Protein	Immune system	NA
prot-a-2549	Regulator of microtubule dynamics protein 1	3301	10534735	2018	NA	Sun BB	public	1	Males and Females	0	29875488	European		NA	Protein	Immune system	NA
prot-a-2551	RecQ-mediated genome instability protein 1	3301	10534735	2018	NA	Sun BB	public	1	Males and Females	0	29875488	European		NA	Protein	Immune system	NA
prot-a-2554	Ribonuclease pancreatic	3301	10534735	2018	NA	Sun BB	public	1	Males and Females	0	29875488	European		NA	Protein	Immune system	NA
prot-a-2555	Non-secretory ribonuclease	3301	10534735	2018	NA	Sun BB	public	1	Males and Females	0	29875488	European		NA	Protein	Immune system	NA
prot-a-2556	Ribonuclease 4	3301	10534735	2018	NA	Sun BB	public	1	Males and Females	0	29875488	European		NA	Protein	Immune system	NA
prot-a-2557	Ribonuclease K6	3301	10534735	2018	NA	Sun BB	public	1	Males and Females	0	29875488	European		NA	Protein	Immune system	NA
prot-a-256	Bone morphogenetic protein 6	3301	10534735	2018	NA	Sun BB	public	1	Males and Females	0	29875488	European		NA	Protein	Immune system	NA
prot-a-2561	RING finger protein 122	3301	10534735	2018	NA	Sun BB	public	1	Males and Females	0	29875488	European		NA	Protein	Immune system	NA
prot-a-2562	E3 ubiquitin-protein ligase RNF128	3301	10534735	2018	NA	Sun BB	public	1	Males and Females	0	29875488	European		NA	Protein	Immune system	NA
prot-a-2563	E3 ubiquitin-protein ligase RNF13	3301	10534735	2018	NA	Sun BB	public	1	Males and Females	0	29875488	European		NA	Protein	Immune system	NA
prot-a-2566	E3 ubiquitin-protein ligase RNF149	3301	10534735	2018	NA	Sun BB	public	1	Males and Females	0	29875488	European		NA	Protein	Immune system	NA
prot-a-2568	RING finger protein 165	3301	10534735	2018	NA	Sun BB	public	1	Males and Females	0	29875488	European		NA	Protein	Immune system	NA
prot-a-257	Bone morphogenetic protein 7	3301	10534735	2018	NA	Sun BB	public	1	Males and Females	0	29875488	European		NA	Protein	Immune system	NA
prot-a-2572	E3 ubiquitin-protein ligase RNF43	3301	10534735	2018	NA	Sun BB	public	1	Males and Females	0	29875488	European		NA	Protein	Immune system	NA
prot-a-2573	E3 ubiquitin-protein ligase RNF8	3301	10534735	2018	NA	Sun BB	public	1	Males and Females	0	29875488	European		NA	Protein	Immune system	NA
prot-a-2575	rRNA methyltransferase 3, mitochondrial	3301	10534735	2018	NA	Sun BB	public	1	Males and Females	0	29875488	European		NA	Protein	Immune system	NA
prot-a-2576	RNA-binding protein 40	3301	10534735	2018	NA	Sun BB	public	1	Males and Females	0	29875488	European		NA	Protein	Immune system	NA
prot-a-2581	Tyrosine-protein kinase transmembrane receptor ROR1	3301	10534735	2018	NA	Sun BB	public	1	Males and Females	0	29875488	European		NA	Protein	Immune system	NA
prot-a-2582	Tyrosine-protein kinase transmembrane receptor ROR2	3301	10534735	2018	NA	Sun BB	public	1	Males and Females	0	29875488	European		NA	Protein	Immune system	NA
prot-a-2585	Ribose-5-phosphate isomerase	3301	10534735	2018	NA	Sun BB	public	1	Males and Females	0	29875488	European		NA	Protein	Immune system	NA
prot-a-2586	60S ribosomal protein L30	3301	10534735	2018	NA	Sun BB	public	1	Males and Females	0	29875488	European		NA	Protein	Immune system	NA
prot-a-2588	Dolichyl-diphosphooligosaccharide--protein glycosyltransferase subunit 1	3301	10534735	2018	NA	Sun BB	public	1	Males and Females	0	29875488	European		NA	Protein	Immune system	NA
prot-a-2589	Dolichyl-diphosphooligosaccharide--protein glycosyltransferase subunit 1	3301	10534735	2018	NA	Sun BB	public	1	Males and Females	0	29875488	European		NA	Protein	Immune system	NA
prot-a-2590	Regulation of nuclear pre-mRNA domain-containing protein 1A	3301	10534735	2018	NA	Sun BB	public	1	Males and Females	0	29875488	European		NA	Protein	Immune system	NA
prot-a-2591	Ubiquitin+1, truncated mutation for UbB	3301	10534735	2018	NA	Sun BB	public	1	Males and Females	0	29875488	European		NA	Protein	Immune system	NA
prot-a-2592	Ubiquitin	3301	10534735	2018	NA	Sun BB	public	1	Males and Females	0	29875488	European		NA	Protein	Immune system	NA
prot-a-2593	40S ribosomal protein S3	3301	10534735	2018	NA	Sun BB	public	1	Males and Females	0	29875488	European		NA	Protein	Immune system	NA
prot-a-2594	40S ribosomal protein S3a	3301	10534735	2018	NA	Sun BB	public	1	Males and Females	0	29875488	European		NA	Protein	Immune system	NA
prot-a-2595	40S ribosomal protein S4, X isoform	3301	10534735	2018	NA	Sun BB	public	1	Males and Females	0	29875488	European		NA	Protein	Immune system	NA
prot-a-2596	Ribosomal protein S6 kinase alpha-6	3301	10534735	2018	NA	Sun BB	public	1	Males and Females	0	29875488	European		NA	Protein	Immune system	NA
prot-a-2597	40S ribosomal protein S7	3301	10534735	2018	NA	Sun BB	public	1	Males and Females	0	29875488	European		NA	Protein	Immune system	NA
prot-a-2598	40S ribosomal protein SA	3301	10534735	2018	NA	Sun BB	public	1	Males and Females	0	29875488	European		NA	Protein	Immune system	NA
prot-a-2601	Ribonucleoside-diphosphate reductase large subunit	3301	10534735	2018	NA	Sun BB	public	1	Males and Females	0	29875488	European		NA	Protein	Immune system	NA
prot-a-2602	Ribonucleoside-diphosphate reductase subunit M2 B	3301	10534735	2018	NA	Sun BB	public	1	Males and Females	0	29875488	European		NA	Protein	Immune system	NA
prot-a-2605	R-spondin-3	3301	10534735	2018	NA	Sun BB	public	1	Males and Females	0	29875488	European		NA	Protein	Immune system	NA
prot-a-2609	Reticulon-4 receptor	3301	10534735	2018	NA	Sun BB	public	1	Males and Females	0	29875488	European		NA	Protein	Immune system	NA
prot-a-261	BCL2/adenovirus E1B 19 kDa protein-interacting protein 3	3301	10534735	2018	NA	Sun BB	public	1	Males and Females	0	29875488	European		NA	Protein	Immune system	NA
prot-a-2611	Runt-related transcription factor 3	3301	10534735	2018	NA	Sun BB	public	1	Males and Females	0	29875488	European		NA	Protein	Immune system	NA
prot-a-2614	Protein S100-A11	3301	10534735	2018	NA	Sun BB	public	1	Males and Females	0	29875488	European		NA	Protein	Immune system	NA
prot-a-2615	Protein S100-A12	3301	10534735	2018	NA	Sun BB	public	1	Males and Females	0	29875488	European		NA	Protein	Immune system	NA
prot-a-2616	Protein S100-A13	3301	10534735	2018	NA	Sun BB	public	1	Males and Females	0	29875488	European		NA	Protein	Immune system	NA
prot-a-2617	Protein S100-A2	3301	10534735	2018	NA	Sun BB	public	1	Males and Females	0	29875488	European		NA	Protein	Immune system	NA
prot-a-2618	Protein S100-A4	3301	10534735	2018	NA	Sun BB	public	1	Males and Females	0	29875488	European		NA	Protein	Immune system	NA
prot-a-2619	Protein S100-A5	3301	10534735	2018	NA	Sun BB	public	1	Males and Females	0	29875488	European		NA	Protein	Immune system	NA
prot-a-2620	Protein S100-A6	3301	10534735	2018	NA	Sun BB	public	1	Males and Females	0	29875488	European		NA	Protein	Immune system	NA
prot-a-2622	Protein S100-A9	3301	10534735	2018	NA	Sun BB	public	1	Males and Females	0	29875488	European		NA	Protein	Immune system	NA
prot-a-2623	Serum amyloid A-1 protein	3301	10534735	2018	NA	Sun BB	public	1	Males and Females	0	29875488	European		NA	Protein	Immune system	NA
prot-a-2625	Histone deacetylase complex subunit SAP18	3301	10534735	2018	NA	Sun BB	public	1	Males and Females	0	29875488	European		NA	Protein	Immune system	NA
prot-a-2628	Diamine acetyltransferase 1	3301	10534735	2018	NA	Sun BB	public	1	Males and Females	0	29875488	European		NA	Protein	Immune system	NA
prot-a-2629	Diamine acetyltransferase 2	3301	10534735	2018	NA	Sun BB	public	1	Males and Females	0	29875488	European		NA	Protein	Immune system	NA
prot-a-2633	Suprabasin	3301	10534735	2018	NA	Sun BB	public	1	Males and Females	0	29875488	European		NA	Protein	Immune system	NA
prot-a-2638	Scavenger receptor class A member 3	3301	10534735	2018	NA	Sun BB	public	1	Males and Females	0	29875488	European		NA	Protein	Immune system	NA
prot-a-2639	Scavenger receptor class A member 5	3301	10534735	2018	NA	Sun BB	public	1	Males and Females	0	29875488	European		NA	Protein	Immune system	NA
prot-a-2642	Scavenger receptor class F member 2	3301	10534735	2018	NA	Sun BB	public	1	Males and Females	0	29875488	European		NA	Protein	Immune system	NA
prot-a-2645	Secretogranin-3	3301	10534735	2018	NA	Sun BB	public	1	Males and Females	0	29875488	European		NA	Protein	Immune system	NA
prot-a-2646	Secretoglobin family 1C member 1	3301	10534735	2018	NA	Sun BB	public	1	Males and Females	0	29875488	European		NA	Protein	Immune system	NA
prot-a-2648	Mammaglobin-B	3301	10534735	2018	NA	Sun BB	public	1	Males and Females	0	29875488	European		NA	Protein	Immune system	NA
prot-a-2650	Adseverin	3301	10534735	2018	NA	Sun BB	public	1	Males and Females	0	29875488	European		NA	Protein	Immune system	NA
prot-a-2651	Polycomb protein SCMH1	3301	10534735	2018	NA	Sun BB	public	1	Males and Females	0	29875488	European		NA	Protein	Immune system	NA
prot-a-2654	SCP2 sterol-binding domain-containing protein 1	3301	10534735	2018	NA	Sun BB	public	1	Males and Females	0	29875488	European		NA	Protein	Immune system	NA
prot-a-2655	Signal peptide, CUB and EGF-like domain-containing protein 1	3301	10534735	2018	NA	Sun BB	public	1	Males and Females	0	29875488	European		NA	Protein	Immune system	NA
prot-a-2658	Signal peptidase complex catalytic subunit SEC11C	3301	10534735	2018	NA	Sun BB	public	1	Males and Females	0	29875488	European		NA	Protein	Immune system	NA
prot-a-2659	Protein SEC13 homolog	3301	10534735	2018	NA	Sun BB	public	1	Males and Females	0	29875488	European		NA	Protein	Immune system	NA
prot-a-266	Bactericidal permeability-increasing protein	3301	10534735	2018	NA	Sun BB	public	1	Males and Females	0	29875488	European		NA	Protein	Immune system	NA
prot-a-2663	Secreted and transmembrane protein 1	3301	10534735	2018	NA	Sun BB	public	1	Males and Females	0	29875488	European		NA	Protein	Immune system	NA
prot-a-2665	E-selectin	3301	10534735	2018	NA	Sun BB	public	1	Males and Females	0	29875488	European		NA	Protein	Immune system	NA
prot-a-2666	L-Selectin	3301	10534735	2018	NA	Sun BB	public	1	Males and Females	0	29875488	European		NA	Protein	Immune system	NA
prot-a-2667	P-selectin	3301	10534735	2018	NA	Sun BB	public	1	Males and Females	0	29875488	European		NA	Protein	Immune system	NA
prot-a-2668	P-selectin glycoprotein ligand 1	3301	10534735	2018	NA	Sun BB	public	1	Males and Females	0	29875488	European		NA	Protein	Immune system	NA
prot-a-2669	Semaphorin-3A	3301	10534735	2018	NA	Sun BB	public	1	Males and Females	0	29875488	European		NA	Protein	Immune system	NA
prot-a-2670	Semaphorin-3B	3301	10534735	2018	NA	Sun BB	public	1	Males and Females	0	29875488	European		NA	Protein	Immune system	NA
prot-a-2671	Semaphorin-3C	3301	10534735	2018	NA	Sun BB	public	1	Males and Females	0	29875488	European		NA	Protein	Immune system	NA
prot-a-2673	Semaphorin-3G	3301	10534735	2018	NA	Sun BB	public	1	Males and Females	0	29875488	European		NA	Protein	Immune system	NA
prot-a-2675	Semaphorin-4D	3301	10534735	2018	NA	Sun BB	public	1	Males and Females	0	29875488	European		NA	Protein	Immune system	NA
prot-a-2676	Semaphorin-5A	3301	10534735	2018	NA	Sun BB	public	1	Males and Females	0	29875488	European		NA	Protein	Immune system	NA
prot-a-2678	Semaphorin-6A	3301	10534735	2018	NA	Sun BB	public	1	Males and Females	0	29875488	European		NA	Protein	Immune system	NA
prot-a-2679	Semaphorin-6C	3301	10534735	2018	NA	Sun BB	public	1	Males and Females	0	29875488	European		NA	Protein	Immune system	NA
prot-a-268	BPI fold-containing family B member 1	3301	10534735	2018	NA	Sun BB	public	1	Males and Females	0	29875488	European		NA	Protein	Immune system	NA
prot-a-2681	Semenogelin-1	3301	10534735	2018	NA	Sun BB	public	1	Males and Females	0	29875488	European		NA	Protein	Immune system	NA
prot-a-2684	Selenide, water dikinase 1	3301	10534735	2018	NA	Sun BB	public	1	Males and Females	0	29875488	European		NA	Protein	Immune system	NA
prot-a-2685	Septin-10	3301	10534735	2018	NA	Sun BB	public	1	Males and Females	0	29875488	European		NA	Protein	Immune system	NA
prot-a-2688	Protein Z-dependent protease inhibitor	3301	10534735	2018	NA	Sun BB	public	1	Males and Females	0	29875488	European		NA	Protein	Immune system	NA
prot-a-2689	Protein Z-dependent protease inhibitor	3301	10534735	2018	NA	Sun BB	public	1	Males and Females	0	29875488	European		NA	Protein	Immune system	NA
prot-a-269	Bromodomain-containing protein 1	3301	10534735	2018	NA	Sun BB	public	1	Males and Females	0	29875488	European		NA	Protein	Immune system	NA
prot-a-2690	Serpin A12	3301	10534735	2018	NA	Sun BB	public	1	Males and Females	0	29875488	European		NA	Protein	Immune system	NA
prot-a-2691	Kallistatin	3301	10534735	2018	NA	Sun BB	public	1	Males and Females	0	29875488	European		NA	Protein	Immune system	NA
prot-a-2692	Kallistatin	3301	10534735	2018	NA	Sun BB	public	1	Males and Females	0	29875488	European		NA	Protein	Immune system	NA
prot-a-2694	Serpin A9	3301	10534735	2018	NA	Sun BB	public	1	Males and Females	0	29875488	European		NA	Protein	Immune system	NA
prot-a-2695	Antithrombin-III	3301	10534735	2018	NA	Sun BB	public	1	Males and Females	0	29875488	European		NA	Protein	Immune system	NA
prot-a-2697	Glia-derived nexin	3301	10534735	2018	NA	Sun BB	public	1	Males and Females	0	29875488	European		NA	Protein	Immune system	NA
prot-a-2698	Pigment epithelium-derived factor	3301	10534735	2018	NA	Sun BB	public	1	Males and Females	0	29875488	European		NA	Protein	Immune system	NA
prot-a-2699	Pigment epithelium-derived factor	3301	10534735	2018	NA	Sun BB	public	1	Males and Females	0	29875488	European		NA	Protein	Immune system	NA
prot-a-27	Disintegrin and metalloproteinase domain-containing protein 19	3301	10534735	2018	NA	Sun BB	public	1	Males and Females	0	29875488	European		NA	Protein	Immune system	NA
prot-a-2700	Alpha-2-antiplasmin	3301	10534735	2018	NA	Sun BB	public	1	Males and Females	0	29875488	European		NA	Protein	Immune system	NA
prot-a-2701	Plasma protease C1 inhibitor	3301	10534735	2018	NA	Sun BB	public	1	Males and Females	0	29875488	European		NA	Protein	Immune system	NA
prot-a-2703	Histone-lysine N-methyltransferase SETD2	3301	10534735	2018	NA	Sun BB	public	1	Males and Females	0	29875488	European		NA	Protein	Immune system	NA
prot-a-2704	Histone-lysine N-methyltransferase SETMAR	3301	10534735	2018	NA	Sun BB	public	1	Males and Females	0	29875488	European		NA	Protein	Immune system	NA
prot-a-2706	Splicing factor 1	3301	10534735	2018	NA	Sun BB	public	1	Males and Females	0	29875488	European		NA	Protein	Immune system	NA
prot-a-2708	14-3-3 protein sigma	3301	10534735	2018	NA	Sun BB	public	1	Males and Females	0	29875488	European		NA	Protein	Immune system	NA
prot-a-2709	Secreted frizzled-related protein 1	3301	10534735	2018	NA	Sun BB	public	1	Males and Females	0	29875488	European		NA	Protein	Immune system	NA
prot-a-271	Transcription factor IIIB 90 kDa subunit	3301	10534735	2018	NA	Sun BB	public	1	Males and Females	0	29875488	European		NA	Protein	Immune system	NA
prot-a-2710	Secreted frizzled-related protein 2	3301	10534735	2018	NA	Sun BB	public	1	Males and Females	0	29875488	European		NA	Protein	Immune system	NA
prot-a-2711	Pulmonary surfactant-associated protein C	3301	10534735	2018	NA	Sun BB	public	1	Males and Females	0	29875488	European		NA	Protein	Immune system	NA
prot-a-2712	Pulmonary surfactant-associated protein D	3301	10534735	2018	NA	Sun BB	public	1	Males and Females	0	29875488	European		NA	Protein	Immune system	NA
prot-a-2713	Beta-sarcoglycan	3301	10534735	2018	NA	Sun BB	public	1	Males and Females	0	29875488	European		NA	Protein	Immune system	NA
prot-a-2715	SH2 domain-containing protein 1A	3301	10534735	2018	NA	Sun BB	public	1	Males and Females	0	29875488	European		NA	Protein	Immune system	NA
prot-a-2716	SH3 domain-binding protein 2	3301	10534735	2018	NA	Sun BB	public	1	Males and Females	0	29875488	European		NA	Protein	Immune system	NA
prot-a-2717	SHC-transforming protein 1	3301	10534735	2018	NA	Sun BB	public	1	Males and Females	0	29875488	European		NA	Protein	Immune system	NA
prot-a-272	BRICHOS domain-containing protein 5	3301	10534735	2018	NA	Sun BB	public	1	Males and Females	0	29875488	European		NA	Protein	Immune system	NA
prot-a-2720	Protein shisa-3 homolog	3301	10534735	2018	NA	Sun BB	public	1	Males and Females	0	29875488	European		NA	Protein	Immune system	NA
prot-a-2721	Sialate O-acetylesterase	3301	10534735	2018	NA	Sun BB	public	1	Males and Females	0	29875488	European		NA	Protein	Immune system	NA
prot-a-2722	Single Ig IL-1-related receptor	3301	10534735	2018	NA	Sun BB	public	1	Males and Females	0	29875488	European		NA	Protein	Immune system	NA
prot-a-2723	Sialic acid-binding Ig-like lectin 10	3301	10534735	2018	NA	Sun BB	public	1	Males and Females	0	29875488	European		NA	Protein	Immune system	NA
prot-a-2724	Sialic acid-binding Ig-like lectin 11	3301	10534735	2018	NA	Sun BB	public	1	Males and Females	0	29875488	European		NA	Protein	Immune system	NA
prot-a-2725	Sialic acid-binding Ig-like lectin 12	3301	10534735	2018	NA	Sun BB	public	1	Males and Females	0	29875488	European		NA	Protein	Immune system	NA
prot-a-2726	Sialic acid-binding Ig-like lectin 12	3301	10534735	2018	NA	Sun BB	public	1	Males and Females	0	29875488	European		NA	Protein	Immune system	NA
prot-a-2727	Sialic acid-binding Ig-like lectin 14	3301	10534735	2018	NA	Sun BB	public	1	Males and Females	0	29875488	European		NA	Protein	Immune system	NA
prot-a-2728	Sialic acid-binding Ig-like lectin 14	3301	10534735	2018	NA	Sun BB	public	1	Males and Females	0	29875488	European		NA	Protein	Immune system	NA
prot-a-2729	Sialic acid-binding Ig-like lectin 7	3301	10534735	2018	NA	Sun BB	public	1	Males and Females	0	29875488	European		NA	Protein	Immune system	NA
prot-a-273	Peregrin	3301	10534735	2018	NA	Sun BB	public	1	Males and Females	0	29875488	European		NA	Protein	Immune system	NA
prot-a-2730	Sialic acid-binding Ig-like lectin 8	3301	10534735	2018	NA	Sun BB	public	1	Males and Females	0	29875488	European		NA	Protein	Immune system	NA
prot-a-2731	Sialic acid-binding Ig-like lectin 9	3301	10534735	2018	NA	Sun BB	public	1	Males and Females	0	29875488	European		NA	Protein	Immune system	NA
prot-a-2732	Tyrosine-protein phosphatase non-receptor type substrate 1	3301	10534735	2018	NA	Sun BB	public	1	Males and Females	0	29875488	European		NA	Protein	Immune system	NA
prot-a-2733	Signal-regulatory protein beta-1	3301	10534735	2018	NA	Sun BB	public	1	Males and Females	0	29875488	European		NA	Protein	Immune system	NA
prot-a-2735	Signal-regulatory protein gamma	3301	10534735	2018	NA	Sun BB	public	1	Males and Females	0	29875488	European		NA	Protein	Immune system	NA
prot-a-2736	NAD-dependent protein deacetylase sirtuin-2	3301	10534735	2018	NA	Sun BB	public	1	Males and Females	0	29875488	European		NA	Protein	Immune system	NA
prot-a-2737	NAD-dependent protein deacylase sirtuin-5, mitochondrial	3301	10534735	2018	NA	Sun BB	public	1	Males and Females	0	29875488	European		NA	Protein	Immune system	NA
prot-a-2739	Ski-like protein	3301	10534735	2018	NA	Sun BB	public	1	Males and Females	0	29875488	European		NA	Protein	Immune system	NA
prot-a-2742	SLAM family member 6	3301	10534735	2018	NA	Sun BB	public	1	Males and Females	0	29875488	European		NA	Protein	Immune system	NA
prot-a-2743	SLAM family member 7	3301	10534735	2018	NA	Sun BB	public	1	Males and Females	0	29875488	European		NA	Protein	Immune system	NA
prot-a-2744	SLAM family member 7	3301	10534735	2018	NA	Sun BB	public	1	Males and Females	0	29875488	European		NA	Protein	Immune system	NA
prot-a-2746	Urea transporter 1	3301	10534735	2018	NA	Sun BB	public	1	Males and Females	0	29875488	European		NA	Protein	Immune system	NA
prot-a-2747	Urea transporter 2	3301	10534735	2018	NA	Sun BB	public	1	Males and Females	0	29875488	European		NA	Protein	Immune system	NA
prot-a-2748	Solute carrier family 22 member 16	3301	10534735	2018	NA	Sun BB	public	1	Males and Females	0	29875488	European		NA	Protein	Immune system	NA
prot-a-2752	Very long-chain acyl-CoA synthetase	3301	10534735	2018	NA	Sun BB	public	1	Males and Females	0	29875488	European		NA	Protein	Immune system	NA
prot-a-2755	Adenosine 3'-phospho 5'-phosphosulfate transporter 2	3301	10534735	2018	NA	Sun BB	public	1	Males and Females	0	29875488	European		NA	Protein	Immune system	NA
prot-a-2756	Solute carrier family 35 member G2	3301	10534735	2018	NA	Sun BB	public	1	Males and Females	0	29875488	European		NA	Protein	Immune system	NA
prot-a-2757	Solute carrier family 41 member 2	3301	10534735	2018	NA	Sun BB	public	1	Males and Females	0	29875488	European		NA	Protein	Immune system	NA
prot-a-276	ADP-ribosyl cyclase/cyclic ADP-ribose hydrolase 2	3301	10534735	2018	NA	Sun BB	public	1	Males and Females	0	29875488	European		NA	Protein	Immune system	NA
prot-a-2760	Sodium-coupled monocarboxylate transporter 1	3301	10534735	2018	NA	Sun BB	public	1	Males and Females	0	29875488	European		NA	Protein	Immune system	NA
prot-a-2761	Sodium- and chloride-dependent neutral and basic amino acid transporter B(0+)	3301	10534735	2018	NA	Sun BB	public	1	Males and Females	0	29875488	European		NA	Protein	Immune system	NA
prot-a-2764	Mitochondrial sodium/hydrogen exchanger 9B2	3301	10534735	2018	NA	Sun BB	public	1	Males and Females	0	29875488	European		NA	Protein	Immune system	NA
prot-a-2767	SLIT and NTRK-like protein 3	3301	10534735	2018	NA	Sun BB	public	1	Males and Females	0	29875488	European		NA	Protein	Immune system	NA
prot-a-2769	SLIT and NTRK-like protein 5	3301	10534735	2018	NA	Sun BB	public	1	Males and Females	0	29875488	European		NA	Protein	Immune system	NA
prot-a-277	Tyrosine-protein kinase BTK	3301	10534735	2018	NA	Sun BB	public	1	Males and Females	0	29875488	European		NA	Protein	Immune system	NA
prot-a-2770	Secreted Ly-6/uPAR-related protein 1	3301	10534735	2018	NA	Sun BB	public	1	Males and Females	0	29875488	European		NA	Protein	Immune system	NA
prot-a-2771	Mothers against decapentaplegic homolog 2	3301	10534735	2018	NA	Sun BB	public	1	Males and Females	0	29875488	European		NA	Protein	Immune system	NA
prot-a-2773	Stromal membrane-associated protein 1	3301	10534735	2018	NA	Sun BB	public	1	Males and Females	0	29875488	European		NA	Protein	Immune system	NA
prot-a-2774	Structural maintenance of chromosomes protein 3	3301	10534735	2018	NA	Sun BB	public	1	Males and Females	0	29875488	European		NA	Protein	Immune system	NA
prot-a-2778	Small integral membrane protein 9	3301	10534735	2018	NA	Sun BB	public	1	Males and Females	0	29875488	European		NA	Protein	Immune system	NA
prot-a-2779	SPARC-related modular calcium-binding protein 1	3301	10534735	2018	NA	Sun BB	public	1	Males and Females	0	29875488	European		NA	Protein	Immune system	NA
prot-a-2780	Acid sphingomyelinase-like phosphodiesterase 3a	3301	10534735	2018	NA	Sun BB	public	1	Males and Females	0	29875488	European		NA	Protein	Immune system	NA
prot-a-2782	Submaxillary gland androgen-regulated protein 3A	3301	10534735	2018	NA	Sun BB	public	1	Males and Females	0	29875488	European		NA	Protein	Immune system	NA
prot-a-2784	N-lysine methyltransferase SMYD2	3301	10534735	2018	NA	Sun BB	public	1	Males and Females	0	29875488	European		NA	Protein	Immune system	NA
prot-a-2786	Synaptosomal-associated protein 25	3301	10534735	2018	NA	Sun BB	public	1	Males and Females	0	29875488	European		NA	Protein	Immune system	NA
prot-a-2789	Alpha-synuclein	3301	10534735	2018	NA	Sun BB	public	1	Males and Females	0	29875488	European		NA	Protein	Immune system	NA
prot-a-2790	Alpha-synuclein	3301	10534735	2018	NA	Sun BB	public	1	Males and Females	0	29875488	European		NA	Protein	Immune system	NA
prot-a-2791	U1 small nuclear ribonucleoprotein A	3301	10534735	2018	NA	Sun BB	public	1	Males and Females	0	29875488	European		NA	Protein	Immune system	NA
prot-a-2792	Sorting nexin-17	3301	10534735	2018	NA	Sun BB	public	1	Males and Females	0	29875488	European		NA	Protein	Immune system	NA
prot-a-2793	Sorting nexin-1	3301	10534735	2018	NA	Sun BB	public	1	Males and Females	0	29875488	European		NA	Protein	Immune system	NA
prot-a-2795	Sorting nexin-7	3301	10534735	2018	NA	Sun BB	public	1	Males and Females	0	29875488	European		NA	Protein	Immune system	NA
prot-a-2796	Sorting nexin-8	3301	10534735	2018	NA	Sun BB	public	1	Males and Females	0	29875488	European		NA	Protein	Immune system	NA
prot-a-2797	Suppressor of cytokine signaling 3	3301	10534735	2018	NA	Sun BB	public	1	Males and Females	0	29875488	European		NA	Protein	Immune system	NA
prot-a-2799	Superoxide dismutase [Mn], mitochondrial	3301	10534735	2018	NA	Sun BB	public	1	Males and Females	0	29875488	European		NA	Protein	Immune system	NA
prot-a-28	Disintegrin and metalloproteinase domain-containing protein 23	3301	10534735	2018	NA	Sun BB	public	1	Males and Females	0	29875488	European		NA	Protein	Immune system	NA
prot-a-280	Uncharacterized protein C10orf35	3301	10534735	2018	NA	Sun BB	public	1	Males and Females	0	29875488	European		NA	Protein	Immune system	NA
prot-a-2800	Extracellular superoxide dismutase [Cu-Zn]	3301	10534735	2018	NA	Sun BB	public	1	Males and Females	0	29875488	European		NA	Protein	Immune system	NA
prot-a-2804	Sperm acrosome membrane-associated protein 3	3301	10534735	2018	NA	Sun BB	public	1	Males and Females	0	29875488	European		NA	Protein	Immune system	NA
prot-a-2805	Protein SPACA7	3301	10534735	2018	NA	Sun BB	public	1	Males and Females	0	29875488	European		NA	Protein	Immune system	NA
prot-a-2806	Sperm-associated antigen 11A	3301	10534735	2018	NA	Sun BB	public	1	Males and Females	0	29875488	European		NA	Protein	Immune system	NA
prot-a-2807	Sperm-associated antigen 11B	3301	10534735	2018	NA	Sun BB	public	1	Males and Females	0	29875488	European		NA	Protein	Immune system	NA
prot-a-2808	SPARC	3301	10534735	2018	NA	Sun BB	public	1	Males and Females	0	29875488	European		NA	Protein	Immune system	NA
prot-a-2809	SPARC	3301	10534735	2018	NA	Sun BB	public	1	Males and Females	0	29875488	European		NA	Protein	Immune system	NA
prot-a-281	Platelet receptor Gi24	3301	10534735	2018	NA	Sun BB	public	1	Males and Females	0	29875488	European		NA	Protein	Immune system	NA
prot-a-2810	SPARC-like protein 1	3301	10534735	2018	NA	Sun BB	public	1	Males and Females	0	29875488	European		NA	Protein	Immune system	NA
prot-a-2811	SPARC-like protein 1	3301	10534735	2018	NA	Sun BB	public	1	Males and Females	0	29875488	European		NA	Protein	Immune system	NA
prot-a-2813	Spermatogenesis-associated protein 20	3301	10534735	2018	NA	Sun BB	public	1	Males and Females	0	29875488	European		NA	Protein	Immune system	NA
prot-a-2815	Maspardin	3301	10534735	2018	NA	Sun BB	public	1	Males and Females	0	29875488	European		NA	Protein	Immune system	NA
prot-a-2816	Sphingosine kinase 2	3301	10534735	2018	NA	Sun BB	public	1	Males and Females	0	29875488	European		NA	Protein	Immune system	NA
prot-a-2818	Serine protease inhibitor Kazal-type 2	3301	10534735	2018	NA	Sun BB	public	1	Males and Females	0	29875488	European		NA	Protein	Immune system	NA
prot-a-282	UPF0696 protein C11orf68	3301	10534735	2018	NA	Sun BB	public	1	Males and Females	0	29875488	European		NA	Protein	Immune system	NA
prot-a-2820	Serine protease inhibitor Kazal-type 6	3301	10534735	2018	NA	Sun BB	public	1	Males and Females	0	29875488	European		NA	Protein	Immune system	NA
prot-a-2823	Kunitz-type protease inhibitor 1	3301	10534735	2018	NA	Sun BB	public	1	Males and Females	0	29875488	European		NA	Protein	Immune system	NA
prot-a-2824	Kunitz-type protease inhibitor 2	3301	10534735	2018	NA	Sun BB	public	1	Males and Females	0	29875488	European		NA	Protein	Immune system	NA
prot-a-2825	Kunitz-type protease inhibitor 3	3301	10534735	2018	NA	Sun BB	public	1	Males and Females	0	29875488	European		NA	Protein	Immune system	NA
prot-a-2826	Testican-1	3301	10534735	2018	NA	Sun BB	public	1	Males and Females	0	29875488	European		NA	Protein	Immune system	NA
prot-a-2827	Testican-2	3301	10534735	2018	NA	Sun BB	public	1	Males and Females	0	29875488	European		NA	Protein	Immune system	NA
prot-a-2828	Testican-3	3301	10534735	2018	NA	Sun BB	public	1	Males and Females	0	29875488	European		NA	Protein	Immune system	NA
prot-a-2829	Spondin-1	3301	10534735	2018	NA	Sun BB	public	1	Males and Females	0	29875488	European		NA	Protein	Immune system	NA
prot-a-283	UPF0454 protein C12orf49	3301	10534735	2018	NA	Sun BB	public	1	Males and Females	0	29875488	European		NA	Protein	Immune system	NA
prot-a-2831	Sepiapterin reductase	3301	10534735	2018	NA	Sun BB	public	1	Males and Females	0	29875488	European		NA	Protein	Immune system	NA
prot-a-2832	Sprouty-related, EVH1 domain-containing protein 1	3301	10534735	2018	NA	Sun BB	public	1	Males and Females	0	29875488	European		NA	Protein	Immune system	NA
prot-a-2835	Spectrin alpha chain, non-erythrocytic 1	3301	10534735	2018	NA	Sun BB	public	1	Males and Females	0	29875488	European		NA	Protein	Immune system	NA
prot-a-2836	Serine palmitoyltransferase 1	3301	10534735	2018	NA	Sun BB	public	1	Males and Females	0	29875488	European		NA	Protein	Immune system	NA
prot-a-2837	Serine palmitoyltransferase 2	3301	10534735	2018	NA	Sun BB	public	1	Males and Females	0	29875488	European		NA	Protein	Immune system	NA
prot-a-2839	Serine/arginine-rich splicing factor 7	3301	10534735	2018	NA	Sun BB	public	1	Males and Females	0	29875488	European		NA	Protein	Immune system	NA
prot-a-2843	Serine-rich single-pass membrane protein 1	3301	10534735	2018	NA	Sun BB	public	1	Males and Females	0	29875488	European		NA	Protein	Immune system	NA
prot-a-2846	Somatostatin-28	3301	10534735	2018	NA	Sun BB	public	1	Males and Females	0	29875488	European		NA	Protein	Immune system	NA
prot-a-2847	RNA polymerase II subunit A C-terminal domain phosphatase SSU72	3301	10534735	2018	NA	Sun BB	public	1	Males and Females	0	29875488	European		NA	Protein	Immune system	NA
prot-a-2848	CMP-N-acetylneuraminate-beta-galactosamide-alpha-2,3-sialyltransferase 1	3301	10534735	2018	NA	Sun BB	public	1	Males and Females	0	29875488	European		NA	Protein	Immune system	NA
prot-a-2852	Alpha-N-acetylgalactosaminide alpha-2,6-sialyltransferase 1	3301	10534735	2018	NA	Sun BB	public	1	Males and Females	0	29875488	European		NA	Protein	Immune system	NA
prot-a-2853	Alpha-N-acetylgalactosaminide alpha-2,6-sialyltransferase 2	3301	10534735	2018	NA	Sun BB	public	1	Males and Females	0	29875488	European		NA	Protein	Immune system	NA
prot-a-2854	Alpha-N-acetylgalactosaminide alpha-2,6-sialyltransferase 3	3301	10534735	2018	NA	Sun BB	public	1	Males and Females	0	29875488	European		NA	Protein	Immune system	NA
prot-a-2862	Stabilin-1	3301	10534735	2018	NA	Sun BB	public	1	Males and Females	0	29875488	European		NA	Protein	Immune system	NA
prot-a-2863	Stabilin-2	3301	10534735	2018	NA	Sun BB	public	1	Males and Females	0	29875488	European		NA	Protein	Immune system	NA
prot-a-2865	Signal-transducing adaptor protein 1	3301	10534735	2018	NA	Sun BB	public	1	Males and Females	0	29875488	European		NA	Protein	Immune system	NA
prot-a-2866	Steroidogenic acute regulatory protein, mitochondrial	3301	10534735	2018	NA	Sun BB	public	1	Males and Females	0	29875488	European		NA	Protein	Immune system	NA
prot-a-2867	Signal transducer and activator of transcription 1-alpha/beta	3301	10534735	2018	NA	Sun BB	public	1	Males and Females	0	29875488	European		NA	Protein	Immune system	NA
prot-a-2869	Signal transducer and activator of transcription 3	3301	10534735	2018	NA	Sun BB	public	1	Males and Females	0	29875488	European		NA	Protein	Immune system	NA
prot-a-2870	Signal transducer and activator of transcription 6	3301	10534735	2018	NA	Sun BB	public	1	Males and Females	0	29875488	European		NA	Protein	Immune system	NA
prot-a-2872	Double-stranded RNA-binding protein Staufen homolog 2	3301	10534735	2018	NA	Sun BB	public	1	Males and Females	0	29875488	European		NA	Protein	Immune system	NA
prot-a-2873	Stanniocalcin-1	3301	10534735	2018	NA	Sun BB	public	1	Males and Females	0	29875488	European		NA	Protein	Immune system	NA
prot-a-2874	Stanniocalcin-2	3301	10534735	2018	NA	Sun BB	public	1	Males and Females	0	29875488	European		NA	Protein	Immune system	NA
prot-a-2875	Stromal interaction molecule 1	3301	10534735	2018	NA	Sun BB	public	1	Males and Females	0	29875488	European		NA	Protein	Immune system	NA
prot-a-2877	Serine/threonine-protein kinase 16	3301	10534735	2018	NA	Sun BB	public	1	Males and Females	0	29875488	European		NA	Protein	Immune system	NA
prot-a-2878	Serine/threonine-protein kinase 17B	3301	10534735	2018	NA	Sun BB	public	1	Males and Females	0	29875488	European		NA	Protein	Immune system	NA
prot-a-2879	Stathmin-2	3301	10534735	2018	NA	Sun BB	public	1	Males and Females	0	29875488	European		NA	Protein	Immune system	NA
prot-a-288	Uncharacterized protein C17orf78	3301	10534735	2018	NA	Sun BB	public	1	Males and Females	0	29875488	European		NA	Protein	Immune system	NA
prot-a-2880	Stathmin-3	3301	10534735	2018	NA	Sun BB	public	1	Males and Females	0	29875488	European		NA	Protein	Immune system	NA
prot-a-2882	Erythrocyte band 7 integral membrane protein	3301	10534735	2018	NA	Sun BB	public	1	Males and Females	0	29875488	European		NA	Protein	Immune system	NA
prot-a-2883	Syntaxin-10	3301	10534735	2018	NA	Sun BB	public	1	Males and Females	0	29875488	European		NA	Protein	Immune system	NA
prot-a-2885	Syntaxin-1A	3301	10534735	2018	NA	Sun BB	public	1	Males and Females	0	29875488	European		NA	Protein	Immune system	NA
prot-a-2888	Syntaxin-6	3301	10534735	2018	NA	Sun BB	public	1	Males and Females	0	29875488	European		NA	Protein	Immune system	NA
prot-a-2889	Syntaxin-7	3301	10534735	2018	NA	Sun BB	public	1	Males and Females	0	29875488	European		NA	Protein	Immune system	NA
prot-a-2890	Syntaxin-8	3301	10534735	2018	NA	Sun BB	public	1	Males and Females	0	29875488	European		NA	Protein	Immune system	NA
prot-a-2891	Extracellular sulfatase Sulf-2	3301	10534735	2018	NA	Sun BB	public	1	Males and Females	0	29875488	European		NA	Protein	Immune system	NA
prot-a-2892	Estrogen sulfotransferase	3301	10534735	2018	NA	Sun BB	public	1	Males and Females	0	29875488	European		NA	Protein	Immune system	NA
prot-a-2893	Bile salt sulfotransferase	3301	10534735	2018	NA	Sun BB	public	1	Males and Females	0	29875488	European		NA	Protein	Immune system	NA
prot-a-2895	Sulfatase-modifying factor 1	3301	10534735	2018	NA	Sun BB	public	1	Males and Females	0	29875488	European		NA	Protein	Immune system	NA
prot-a-2896	Small ubiquitin-related modifier 3	3301	10534735	2018	NA	Sun BB	public	1	Males and Females	0	29875488	European		NA	Protein	Immune system	NA
prot-a-2897	Small ubiquitin-related modifier 3	3301	10534735	2018	NA	Sun BB	public	1	Males and Females	0	29875488	European		NA	Protein	Immune system	NA
prot-a-2899	SUN domain-containing protein 5	3301	10534735	2018	NA	Sun BB	public	1	Males and Females	0	29875488	European		NA	Protein	Immune system	NA
prot-a-2900	Surfeit locus protein 1	3301	10534735	2018	NA	Sun BB	public	1	Males and Females	0	29875488	European		NA	Protein	Immune system	NA
prot-a-2902	Sushi domain-containing protein 2	3301	10534735	2018	NA	Sun BB	public	1	Males and Females	0	29875488	European		NA	Protein	Immune system	NA
prot-a-2904	Histone-lysine N-methyltransferase SUV420H2	3301	10534735	2018	NA	Sun BB	public	1	Males and Females	0	29875488	European		NA	Protein	Immune system	NA
prot-a-2906	Sushi, von Willebrand factor type A, EGF and pentraxin domain-containing protein 1	3301	10534735	2018	NA	Sun BB	public	1	Males and Females	0	29875488	European		NA	Protein	Immune system	NA
prot-a-2907	Sushi, von Willebrand factor type A, EGF and pentraxin domain-containing protein 1	3301	10534735	2018	NA	Sun BB	public	1	Males and Females	0	29875488	European		NA	Protein	Immune system	NA
prot-a-2908	Switch-associated protein 70	3301	10534735	2018	NA	Sun BB	public	1	Males and Females	0	29875488	European		NA	Protein	Immune system	NA
prot-a-2909	Heterogeneous nuclear ribonucleoprotein Q	3301	10534735	2018	NA	Sun BB	public	1	Males and Females	0	29875488	European		NA	Protein	Immune system	NA
prot-a-291	Uncharacterized protein C19orf18	3301	10534735	2018	NA	Sun BB	public	1	Males and Females	0	29875488	European		NA	Protein	Immune system	NA
prot-a-2911	Synaptotagmin-11	3301	10534735	2018	NA	Sun BB	public	1	Males and Females	0	29875488	European		NA	Protein	Immune system	NA
prot-a-2912	Synaptotagmin-17	3301	10534735	2018	NA	Sun BB	public	1	Males and Females	0	29875488	European		NA	Protein	Immune system	NA
prot-a-2914	Synaptotagmin-3	3301	10534735	2018	NA	Sun BB	public	1	Males and Females	0	29875488	European		NA	Protein	Immune system	NA
prot-a-2915	Synaptotagmin-5	3301	10534735	2018	NA	Sun BB	public	1	Males and Females	0	29875488	European		NA	Protein	Immune system	NA
prot-a-2919	Synaptotagmin-like protein 4	3301	10534735	2018	NA	Sun BB	public	1	Males and Females	0	29875488	European		NA	Protein	Immune system	NA
prot-a-2920	Protachykinin-1	3301	10534735	2018	NA	Sun BB	public	1	Males and Females	0	29875488	European		NA	Protein	Immune system	NA
prot-a-2922	Tachykinin-4	3301	10534735	2018	NA	Sun BB	public	1	Males and Females	0	29875488	European		NA	Protein	Immune system	NA
prot-a-2924	Tumor-associated calcium signal transducer 2	3301	10534735	2018	NA	Sun BB	public	1	Males and Females	0	29875488	European		NA	Protein	Immune system	NA
prot-a-2926	Tapasin	3301	10534735	2018	NA	Sun BB	public	1	Males and Females	0	29875488	European		NA	Protein	Immune system	NA
prot-a-2927	Tapasin-related protein	3301	10534735	2018	NA	Sun BB	public	1	Males and Females	0	29875488	European		NA	Protein	Immune system	NA
prot-a-2929	Tax1-binding protein 3	3301	10534735	2018	NA	Sun BB	public	1	Males and Females	0	29875488	European		NA	Protein	Immune system	NA
prot-a-2930	Tubulin-specific chaperone A	3301	10534735	2018	NA	Sun BB	public	1	Males and Females	0	29875488	European		NA	Protein	Immune system	NA
prot-a-2931	Tubulin-specific chaperone E	3301	10534735	2018	NA	Sun BB	public	1	Males and Females	0	29875488	European		NA	Protein	Immune system	NA
prot-a-2933	TATA-box-binding protein	3301	10534735	2018	NA	Sun BB	public	1	Males and Females	0	29875488	European		NA	Protein	Immune system	NA
prot-a-2935	T-box transcription factor TBX3	3301	10534735	2018	NA	Sun BB	public	1	Males and Females	0	29875488	European		NA	Protein	Immune system	NA
prot-a-2938	Transcobalamin-1	3301	10534735	2018	NA	Sun BB	public	1	Males and Females	0	29875488	European		NA	Protein	Immune system	NA
prot-a-2939	Holo-Transcobalamin-2	3301	10534735	2018	NA	Sun BB	public	1	Males and Females	0	29875488	European		NA	Protein	Immune system	NA
prot-a-294	C1GALT1-specific chaperone 1	3301	10534735	2018	NA	Sun BB	public	1	Males and Females	0	29875488	European		NA	Protein	Immune system	NA
prot-a-2940	Teratocarcinoma-derived growth factor 1	3301	10534735	2018	NA	Sun BB	public	1	Males and Females	0	29875488	European		NA	Protein	Immune system	NA
prot-a-2944	Angiopoietin-1 receptor, soluble	3301	10534735	2018	NA	Sun BB	public	1	Males and Females	0	29875488	European		NA	Protein	Immune system	NA
prot-a-2947	Calcineurin B homologous protein 3	3301	10534735	2018	NA	Sun BB	public	1	Males and Females	0	29875488	European		NA	Protein	Immune system	NA
prot-a-2948	Testis-expressed sequence 29 protein	3301	10534735	2018	NA	Sun BB	public	1	Males and Females	0	29875488	European		NA	Protein	Immune system	NA
prot-a-2949	Testis-expressed sequence 29 protein	3301	10534735	2018	NA	Sun BB	public	1	Males and Females	0	29875488	European		NA	Protein	Immune system	NA
prot-a-295	Uncharacterized protein C1orf115	3301	10534735	2018	NA	Sun BB	public	1	Males and Females	0	29875488	European		NA	Protein	Immune system	NA
prot-a-2951	Trefoil factor 1	3301	10534735	2018	NA	Sun BB	public	1	Males and Females	0	29875488	European		NA	Protein	Immune system	NA
prot-a-2953	Trefoil factor 3	3301	10534735	2018	NA	Sun BB	public	1	Males and Females	0	29875488	European		NA	Protein	Immune system	NA
prot-a-2954	Trefoil factor 3	3301	10534735	2018	NA	Sun BB	public	1	Males and Females	0	29875488	European		NA	Protein	Immune system	NA
prot-a-2957	Tissue factor pathway inhibitor	3301	10534735	2018	NA	Sun BB	public	1	Males and Females	0	29875488	European		NA	Protein	Immune system	NA
prot-a-2959	Transferrin receptor protein 1	3301	10534735	2018	NA	Sun BB	public	1	Males and Females	0	29875488	European		NA	Protein	Immune system	NA
prot-a-2965	Transforming growth factor beta-3	3301	10534735	2018	NA	Sun BB	public	1	Males and Females	0	29875488	European		NA	Protein	Immune system	NA
prot-a-2966	Transforming growth factor-beta-induced protein ig-h3	3301	10534735	2018	NA	Sun BB	public	1	Males and Females	0	29875488	European		NA	Protein	Immune system	NA
prot-a-2967	TGF-beta receptor type-2	3301	10534735	2018	NA	Sun BB	public	1	Males and Females	0	29875488	European		NA	Protein	Immune system	NA
prot-a-2970	Thrombospondin-2	3301	10534735	2018	NA	Sun BB	public	1	Males and Females	0	29875488	European		NA	Protein	Immune system	NA
prot-a-2975	Thrombospondin type-1 domain-containing protein 1	3301	10534735	2018	NA	Sun BB	public	1	Males and Females	0	29875488	European		NA	Protein	Immune system	NA
prot-a-2976	Thrombospondin type-1 domain-containing protein 7A	3301	10534735	2018	NA	Sun BB	public	1	Males and Females	0	29875488	European		NA	Protein	Immune system	NA
prot-a-2977	Thymocyte nuclear protein 1	3301	10534735	2018	NA	Sun BB	public	1	Males and Females	0	29875488	European		NA	Protein	Immune system	NA
prot-a-2978	Tyrosine-protein kinase receptor Tie-1, soluble	3301	10534735	2018	NA	Sun BB	public	1	Males and Females	0	29875488	European		NA	Protein	Immune system	NA
prot-a-2979	Fructose-2,6-bisphosphatase TIGAR	3301	10534735	2018	NA	Sun BB	public	1	Males and Females	0	29875488	European		NA	Protein	Immune system	NA
prot-a-298	Type III endosome membrane protein TEMP	3301	10534735	2018	NA	Sun BB	public	1	Males and Females	0	29875488	European		NA	Protein	Immune system	NA
prot-a-2980	Metalloproteinase inhibitor 4	3301	10534735	2018	NA	Sun BB	public	1	Males and Females	0	29875488	European		NA	Protein	Immune system	NA
prot-a-2982	Toll/interleukin-1 receptor domain-containing adapter protein	3301	10534735	2018	NA	Sun BB	public	1	Males and Females	0	29875488	European		NA	Protein	Immune system	NA
prot-a-2983	Tight junction protein ZO-1	3301	10534735	2018	NA	Sun BB	public	1	Males and Females	0	29875488	European		NA	Protein	Immune system	NA
prot-a-2984	Thymidine kinase, cytosolic	3301	10534735	2018	NA	Sun BB	public	1	Males and Females	0	29875488	European		NA	Protein	Immune system	NA
prot-a-2985	Transketolase	3301	10534735	2018	NA	Sun BB	public	1	Males and Females	0	29875488	European		NA	Protein	Immune system	NA
prot-a-2987	Talin-2	3301	10534735	2018	NA	Sun BB	public	1	Males and Females	0	29875488	European		NA	Protein	Immune system	NA
prot-a-2991	Toll-like receptor 4:Lymphocyte antigen 96 complex	3301	10534735	2018	NA	Sun BB	public	1	Males and Females	0	29875488	European		NA	Protein	Immune system	NA
prot-a-2997	Transmembrane protein 132A	3301	10534735	2018	NA	Sun BB	public	1	Males and Females	0	29875488	European		NA	Protein	Immune system	NA
prot-a-2998	Transmembrane protein 132B	3301	10534735	2018	NA	Sun BB	public	1	Males and Females	0	29875488	European		NA	Protein	Immune system	NA
prot-a-2999	Transmembrane protein 132C	3301	10534735	2018	NA	Sun BB	public	1	Males and Females	0	29875488	European		NA	Protein	Immune system	NA
prot-a-3	Alanine--tRNA ligase, cytoplasmic	3301	10534735	2018	NA	Sun BB	public	1	Males and Females	0	29875488	European		NA	Protein	Immune system	NA
prot-a-300	Complement component 1 Q subcomponent-binding protein, mitochondrial	3301	10534735	2018	NA	Sun BB	public	1	Males and Females	0	29875488	European		NA	Protein	Immune system	NA
prot-a-3000	Transmembrane protein 132C	3301	10534735	2018	NA	Sun BB	public	1	Males and Females	0	29875488	European		NA	Protein	Immune system	NA
prot-a-3001	Transmembrane protein 132D	3301	10534735	2018	NA	Sun BB	public	1	Males and Females	0	29875488	European		NA	Protein	Immune system	NA
prot-a-3004	Transmembrane protein 190	3301	10534735	2018	NA	Sun BB	public	1	Males and Females	0	29875488	European		NA	Protein	Immune system	NA
prot-a-3009	Transmembrane protein 2	3301	10534735	2018	NA	Sun BB	public	1	Males and Females	0	29875488	European		NA	Protein	Immune system	NA
prot-a-301	Complement C1q subcomponent subunit C	3301	10534735	2018	NA	Sun BB	public	1	Males and Females	0	29875488	European		NA	Protein	Immune system	NA
prot-a-3014	Transmembrane protein 59-like	3301	10534735	2018	NA	Sun BB	public	1	Males and Females	0	29875488	European		NA	Protein	Immune system	NA
prot-a-3016	Transmembrane protein 87B	3301	10534735	2018	NA	Sun BB	public	1	Males and Females	0	29875488	European		NA	Protein	Immune system	NA
prot-a-3019	Transmembrane inner ear expressed protein	3301	10534735	2018	NA	Sun BB	public	1	Males and Females	0	29875488	European		NA	Protein	Immune system	NA
prot-a-3021	Lamina-associated polypeptide 2, isoforms beta/gamma	3301	10534735	2018	NA	Sun BB	public	1	Males and Females	0	29875488	European		NA	Protein	Immune system	NA
prot-a-3022	Transmembrane protease serine 11A	3301	10534735	2018	NA	Sun BB	public	1	Males and Females	0	29875488	European		NA	Protein	Immune system	NA
prot-a-3024	Transmembrane protease serine 11D	3301	10534735	2018	NA	Sun BB	public	1	Males and Females	0	29875488	European		NA	Protein	Immune system	NA
prot-a-3025	Enteropeptidase	3301	10534735	2018	NA	Sun BB	public	1	Males and Females	0	29875488	European		NA	Protein	Immune system	NA
prot-a-3028	Tenascin	3301	10534735	2018	NA	Sun BB	public	1	Males and Females	0	29875488	European		NA	Protein	Immune system	NA
prot-a-3029	Tumor necrosis factor	3301	10534735	2018	NA	Sun BB	public	1	Males and Females	0	29875488	European		NA	Protein	Immune system	NA
prot-a-303	Complement C1q tumor necrosis factor-related protein 1	3301	10534735	2018	NA	Sun BB	public	1	Males and Females	0	29875488	European		NA	Protein	Immune system	NA
prot-a-3031	Tumor necrosis factor-inducible gene 6 protein	3301	10534735	2018	NA	Sun BB	public	1	Males and Females	0	29875488	European		NA	Protein	Immune system	NA
prot-a-3034	Tumor necrosis factor receptor superfamily member 10D	3301	10534735	2018	NA	Sun BB	public	1	Males and Females	0	29875488	European		NA	Protein	Immune system	NA
prot-a-3036	Tumor necrosis factor receptor superfamily member 11A	3301	10534735	2018	NA	Sun BB	public	1	Males and Females	0	29875488	European		NA	Protein	Immune system	NA
prot-a-3038	Tumor necrosis factor receptor superfamily member 11B	3301	10534735	2018	NA	Sun BB	public	1	Males and Females	0	29875488	European		NA	Protein	Immune system	NA
prot-a-3039	Tumor necrosis factor receptor superfamily member 11B	3301	10534735	2018	NA	Sun BB	public	1	Males and Females	0	29875488	European		NA	Protein	Immune system	NA
prot-a-304	Complement C1q tumor necrosis factor-related protein 3	3301	10534735	2018	NA	Sun BB	public	1	Males and Females	0	29875488	European		NA	Protein	Immune system	NA
prot-a-3045	Tumor necrosis factor receptor superfamily member 19	3301	10534735	2018	NA	Sun BB	public	1	Males and Females	0	29875488	European		NA	Protein	Immune system	NA
prot-a-3046	Tumor necrosis factor receptor superfamily member 1A	3301	10534735	2018	NA	Sun BB	public	1	Males and Females	0	29875488	European		NA	Protein	Immune system	NA
prot-a-3047	Tumor necrosis factor receptor superfamily member 1B	3301	10534735	2018	NA	Sun BB	public	1	Males and Females	0	29875488	European		NA	Protein	Immune system	NA
prot-a-3048	Tumor necrosis factor receptor superfamily member 1B	3301	10534735	2018	NA	Sun BB	public	1	Males and Females	0	29875488	European		NA	Protein	Immune system	NA
prot-a-305	Complement C1q tumor necrosis factor-related protein 5	3301	10534735	2018	NA	Sun BB	public	1	Males and Females	0	29875488	European		NA	Protein	Immune system	NA
prot-a-3053	Tumor necrosis factor receptor superfamily member 8	3301	10534735	2018	NA	Sun BB	public	1	Males and Females	0	29875488	European		NA	Protein	Immune system	NA
prot-a-3054	Tumor necrosis factor ligand superfamily member 11	3301	10534735	2018	NA	Sun BB	public	1	Males and Females	0	29875488	European		NA	Protein	Immune system	NA
prot-a-3057	Tumor necrosis factor ligand superfamily member 14	3301	10534735	2018	NA	Sun BB	public	1	Males and Females	0	29875488	European		NA	Protein	Immune system	NA
prot-a-306	Complement C1q and tumor necrosis factor-related protein 9A	3301	10534735	2018	NA	Sun BB	public	1	Males and Females	0	29875488	European		NA	Protein	Immune system	NA
prot-a-3061	Tumor necrosis factor ligand superfamily member 4	3301	10534735	2018	NA	Sun BB	public	1	Males and Females	0	29875488	European		NA	Protein	Immune system	NA
prot-a-3063	Tumor necrosis factor ligand superfamily member 8	3301	10534735	2018	NA	Sun BB	public	1	Males and Females	0	29875488	European		NA	Protein	Immune system	NA
prot-a-3067	Troponin I, cardiac muscle	3301	10534735	2018	NA	Sun BB	public	1	Males and Females	0	29875488	European		NA	Protein	Immune system	NA
prot-a-3068	Tenascin-R	3301	10534735	2018	NA	Sun BB	public	1	Males and Females	0	29875488	European		NA	Protein	Immune system	NA
prot-a-3069	Tensin-2	3301	10534735	2018	NA	Sun BB	public	1	Males and Females	0	29875488	European		NA	Protein	Immune system	NA
prot-a-307	Complement C1r subcomponent-like protein	3301	10534735	2018	NA	Sun BB	public	1	Males and Females	0	29875488	European		NA	Protein	Immune system	NA
prot-a-3070	Tensin-4	3301	10534735	2018	NA	Sun BB	public	1	Males and Females	0	29875488	European		NA	Protein	Immune system	NA
prot-a-3071	Tenascin-X	3301	10534735	2018	NA	Sun BB	public	1	Males and Females	0	29875488	European		NA	Protein	Immune system	NA
prot-a-3073	TOM1-like protein 1	3301	10534735	2018	NA	Sun BB	public	1	Males and Females	0	29875488	European		NA	Protein	Immune system	NA
prot-a-3076	Torsin-1A-interacting protein 1	3301	10534735	2018	NA	Sun BB	public	1	Males and Females	0	29875488	European		NA	Protein	Immune system	NA
prot-a-3080	Cellular tumor antigen p53	3301	10534735	2018	NA	Sun BB	public	1	Males and Females	0	29875488	European		NA	Protein	Immune system	NA
prot-a-3083	Triosephosphate isomerase	3301	10534735	2018	NA	Sun BB	public	1	Males and Females	0	29875488	European		NA	Protein	Immune system	NA
prot-a-3086	Tropomyosin beta chain	3301	10534735	2018	NA	Sun BB	public	1	Males and Females	0	29875488	European		NA	Protein	Immune system	NA
prot-a-3088	Thyroid peroxidase	3301	10534735	2018	NA	Sun BB	public	1	Males and Females	0	29875488	European		NA	Protein	Immune system	NA
prot-a-3089	Tubulin polymerization-promoting protein family member 2	3301	10534735	2018	NA	Sun BB	public	1	Males and Females	0	29875488	European		NA	Protein	Immune system	NA
prot-a-3090	Tryptase beta-2	3301	10534735	2018	NA	Sun BB	public	1	Males and Females	0	29875488	European		NA	Protein	Immune system	NA
prot-a-3091	Tryptase gamma	3301	10534735	2018	NA	Sun BB	public	1	Males and Females	0	29875488	European		NA	Protein	Immune system	NA
prot-a-3092	Protein-tyrosine sulfotransferase 1	3301	10534735	2018	NA	Sun BB	public	1	Males and Females	0	29875488	European		NA	Protein	Immune system	NA
prot-a-3093	Protein-tyrosine sulfotransferase 2	3301	10534735	2018	NA	Sun BB	public	1	Males and Females	0	29875488	European		NA	Protein	Immune system	NA
prot-a-3094	Translationally-controlled tumor protein	3301	10534735	2018	NA	Sun BB	public	1	Males and Females	0	29875488	European		NA	Protein	Immune system	NA
prot-a-3095	Transformer-2 protein homolog beta	3301	10534735	2018	NA	Sun BB	public	1	Males and Females	0	29875488	European		NA	Protein	Immune system	NA
prot-a-3098	Triggering receptor expressed on myeloid cells 1	3301	10534735	2018	NA	Sun BB	public	1	Males and Females	0	29875488	European		NA	Protein	Immune system	NA
prot-a-3099	Trem-like transcript 1 protein	3301	10534735	2018	NA	Sun BB	public	1	Males and Females	0	29875488	European		NA	Protein	Immune system	NA
prot-a-310	Augurin	3301	10534735	2018	NA	Sun BB	public	1	Males and Females	0	29875488	European		NA	Protein	Immune system	NA
prot-a-3100	Trem-like transcript 2 protein	3301	10534735	2018	NA	Sun BB	public	1	Males and Females	0	29875488	European		NA	Protein	Immune system	NA
prot-a-3101	Trem-like transcript 4 protein	3301	10534735	2018	NA	Sun BB	public	1	Males and Females	0	29875488	European		NA	Protein	Immune system	NA
prot-a-3102	Thyrotropin-releasing hormone	3301	10534735	2018	NA	Sun BB	public	1	Males and Females	0	29875488	European		NA	Protein	Immune system	NA
prot-a-3103	Tumor susceptibility gene 101 protein	3301	10534735	2018	NA	Sun BB	public	1	Males and Females	0	29875488	European		NA	Protein	Immune system	NA
prot-a-3109	Thiosulfate sulfurtransferase	3301	10534735	2018	NA	Sun BB	public	1	Males and Females	0	29875488	European		NA	Protein	Immune system	NA
prot-a-311	Uncharacterized protein C2orf66	3301	10534735	2018	NA	Sun BB	public	1	Males and Females	0	29875488	European		NA	Protein	Immune system	NA
prot-a-3114	Tubulin--tyrosine ligase	3301	10534735	2018	NA	Sun BB	public	1	Males and Females	0	29875488	European		NA	Protein	Immune system	NA
prot-a-3123	Thioredoxin domain-containing protein 12	3301	10534735	2018	NA	Sun BB	public	1	Males and Females	0	29875488	European		NA	Protein	Immune system	NA
prot-a-3124	Thioredoxin domain-containing protein 5	3301	10534735	2018	NA	Sun BB	public	1	Males and Females	0	29875488	European		NA	Protein	Immune system	NA
prot-a-3125	Thioredoxin-interacting protein	3301	10534735	2018	NA	Sun BB	public	1	Males and Females	0	29875488	European		NA	Protein	Immune system	NA
prot-a-3127	Non-receptor tyrosine-protein kinase TYK2	3301	10534735	2018	NA	Sun BB	public	1	Males and Females	0	29875488	European		NA	Protein	Immune system	NA
prot-a-3128	TYMS opposite strand protein	3301	10534735	2018	NA	Sun BB	public	1	Males and Females	0	29875488	European		NA	Protein	Immune system	NA
prot-a-3129	Tyrosine-protein kinase receptor TYRO3	3301	10534735	2018	NA	Sun BB	public	1	Males and Females	0	29875488	European		NA	Protein	Immune system	NA
prot-a-3133	PolyUbiquitin K48-linked	3301	10534735	2018	NA	Sun BB	public	1	Males and Females	0	29875488	European		NA	Protein	Immune system	NA
prot-a-3136	Ubiquitin-conjugating enzyme E2 D4	3301	10534735	2018	NA	Sun BB	public	1	Males and Females	0	29875488	European		NA	Protein	Immune system	NA
prot-a-3137	Ubiquitin-conjugating enzyme E2 G2	3301	10534735	2018	NA	Sun BB	public	1	Males and Females	0	29875488	European		NA	Protein	Immune system	NA
prot-a-3138	SUMO-conjugating enzyme UBC9	3301	10534735	2018	NA	Sun BB	public	1	Males and Females	0	29875488	European		NA	Protein	Immune system	NA
prot-a-314	Uncharacterized protein C3orf18	3301	10534735	2018	NA	Sun BB	public	1	Males and Females	0	29875488	European		NA	Protein	Immune system	NA
prot-a-3140	Ubiquitin-conjugating enzyme E2 J2	3301	10534735	2018	NA	Sun BB	public	1	Males and Females	0	29875488	European		NA	Protein	Immune system	NA
prot-a-3143	Ubiquitin-conjugating enzyme E2 N	3301	10534735	2018	NA	Sun BB	public	1	Males and Females	0	29875488	European		NA	Protein	Immune system	NA
prot-a-3145	Ubiquitin-conjugating enzyme E2 variant 1	3301	10534735	2018	NA	Sun BB	public	1	Males and Females	0	29875488	European		NA	Protein	Immune system	NA
prot-a-3146	Ubiquitin-like protein 4A	3301	10534735	2018	NA	Sun BB	public	1	Males and Females	0	29875488	European		NA	Protein	Immune system	NA
prot-a-3147	Ubiquilin-4	3301	10534735	2018	NA	Sun BB	public	1	Males and Females	0	29875488	European		NA	Protein	Immune system	NA
prot-a-3148	Ubiquitin domain-containing protein 2	3301	10534735	2018	NA	Sun BB	public	1	Males and Females	0	29875488	European		NA	Protein	Immune system	NA
prot-a-3149	UBX domain-containing protein 4	3301	10534735	2018	NA	Sun BB	public	1	Males and Females	0	29875488	European		NA	Protein	Immune system	NA
prot-a-315	Complement C4	3301	10534735	2018	NA	Sun BB	public	1	Males and Females	0	29875488	European		NA	Protein	Immune system	NA
prot-a-3152	Unique cartilage matrix-associated protein	3301	10534735	2018	NA	Sun BB	public	1	Males and Females	0	29875488	European		NA	Protein	Immune system	NA
prot-a-3156	UDP-glucuronosyltransferase 1-6	3301	10534735	2018	NA	Sun BB	public	1	Males and Females	0	29875488	European		NA	Protein	Immune system	NA
prot-a-3159	NKG2D ligand 1	3301	10534735	2018	NA	Sun BB	public	1	Males and Females	0	29875488	European		NA	Protein	Immune system	NA
prot-a-316	Protein CEI	3301	10534735	2018	NA	Sun BB	public	1	Males and Females	0	29875488	European		NA	Protein	Immune system	NA
prot-a-317	Glutaredoxin-like protein C5orf63	3301	10534735	2018	NA	Sun BB	public	1	Males and Females	0	29875488	European		NA	Protein	Immune system	NA
prot-a-3171	Protein unc-93 homolog B1	3301	10534735	2018	NA	Sun BB	public	1	Males and Females	0	29875488	European		NA	Protein	Immune system	NA
prot-a-3173	Uroplakin-3b-like protein	3301	10534735	2018	NA	Sun BB	public	1	Males and Females	0	29875488	European		NA	Protein	Immune system	NA
prot-a-3175	Cytochrome b-c1 complex subunit 7	3301	10534735	2018	NA	Sun BB	public	1	Males and Females	0	29875488	European		NA	Protein	Immune system	NA
prot-a-3176	Uroporphyrinogen-III synthase	3301	10534735	2018	NA	Sun BB	public	1	Males and Females	0	29875488	European		NA	Protein	Immune system	NA
prot-a-3179	Ubiquitin carboxyl-terminal hydrolase 21	3301	10534735	2018	NA	Sun BB	public	1	Males and Females	0	29875488	European		NA	Protein	Immune system	NA
prot-a-318	Complement component C6	3301	10534735	2018	NA	Sun BB	public	1	Males and Females	0	29875488	European		NA	Protein	Immune system	NA
prot-a-3180	Ubiquitin carboxyl-terminal hydrolase 25	3301	10534735	2018	NA	Sun BB	public	1	Males and Females	0	29875488	European		NA	Protein	Immune system	NA
prot-a-3181	Ubiquitin carboxyl-terminal hydrolase 8	3301	10534735	2018	NA	Sun BB	public	1	Males and Females	0	29875488	European		NA	Protein	Immune system	NA
prot-a-3182	Uronyl 2-sulfotransferase	3301	10534735	2018	NA	Sun BB	public	1	Males and Females	0	29875488	European		NA	Protein	Immune system	NA
prot-a-3189	Vesicle-associated membrane protein-associated protein A	3301	10534735	2018	NA	Sun BB	public	1	Males and Females	0	29875488	European		NA	Protein	Immune system	NA
prot-a-319	Uncharacterized protein C6orf226	3301	10534735	2018	NA	Sun BB	public	1	Males and Females	0	29875488	European		NA	Protein	Immune system	NA
prot-a-3191	Valine--tRNA ligase	3301	10534735	2018	NA	Sun BB	public	1	Males and Females	0	29875488	European		NA	Protein	Immune system	NA
prot-a-3193	Vascular cell adhesion protein 1	3301	10534735	2018	NA	Sun BB	public	1	Males and Females	0	29875488	European		NA	Protein	Immune system	NA
prot-a-3194	Versican core protein	3301	10534735	2018	NA	Sun BB	public	1	Males and Females	0	29875488	European		NA	Protein	Immune system	NA
prot-a-3196	Testis-specific basic protein Y 1	3301	10534735	2018	NA	Sun BB	public	1	Males and Females	0	29875488	European		NA	Protein	Immune system	NA
prot-a-3197	Vascular endothelial growth factor A, isoform 121	3301	10534735	2018	NA	Sun BB	public	1	Males and Females	0	29875488	European		NA	Protein	Immune system	NA
prot-a-3198	Vascular endothelial growth factor A	3301	10534735	2018	NA	Sun BB	public	1	Males and Females	0	29875488	European		NA	Protein	Immune system	NA
prot-a-3199	Vascular endothelial growth factor C	3301	10534735	2018	NA	Sun BB	public	1	Males and Females	0	29875488	European		NA	Protein	Immune system	NA
prot-a-32	A disintegrin and metalloproteinase with thrombospondin motifs 13	3301	10534735	2018	NA	Sun BB	public	1	Males and Females	0	29875488	European		NA	Protein	Immune system	NA
prot-a-320	Bombesin receptor-activated protein C6orf89	3301	10534735	2018	NA	Sun BB	public	1	Males and Females	0	29875488	European		NA	Protein	Immune system	NA
prot-a-3200	Selenoprotein S	3301	10534735	2018	NA	Sun BB	public	1	Males and Females	0	29875488	European		NA	Protein	Immune system	NA
prot-a-3201	Vitrin	3301	10534735	2018	NA	Sun BB	public	1	Males and Females	0	29875488	European		NA	Protein	Immune system	NA
prot-a-3202	Charged multivesicular body protein 3	3301	10534735	2018	NA	Sun BB	public	1	Males and Females	0	29875488	European		NA	Protein	Immune system	NA
prot-a-3203	Vacuolar protein sorting-associated protein 29	3301	10534735	2018	NA	Sun BB	public	1	Males and Females	0	29875488	European		NA	Protein	Immune system	NA
prot-a-3204	Vacuolar protein sorting-associated protein 4A	3301	10534735	2018	NA	Sun BB	public	1	Males and Females	0	29875488	European		NA	Protein	Immune system	NA
prot-a-3205	Vacuolar protein sorting-associated protein 4B	3301	10534735	2018	NA	Sun BB	public	1	Males and Females	0	29875488	European		NA	Protein	Immune system	NA
prot-a-3206	Serine/threonine-protein kinase VRK1	3301	10534735	2018	NA	Sun BB	public	1	Males and Females	0	29875488	European		NA	Protein	Immune system	NA
prot-a-3211	Vacuolar protein sorting-associated protein VTA1 homolog	3301	10534735	2018	NA	Sun BB	public	1	Males and Females	0	29875488	European		NA	Protein	Immune system	NA
prot-a-3212	Vesicle transport through interaction with t-SNAREs homolog 1A	3301	10534735	2018	NA	Sun BB	public	1	Males and Females	0	29875488	European		NA	Protein	Immune system	NA
prot-a-3213	Vesicle transport through interaction with t-SNAREs homolog 1B	3301	10534735	2018	NA	Sun BB	public	1	Males and Females	0	29875488	European		NA	Protein	Immune system	NA
prot-a-3214	Vitronectin	3301	10534735	2018	NA	Sun BB	public	1	Males and Females	0	29875488	European		NA	Protein	Immune system	NA
prot-a-3215	Vitronectin	3301	10534735	2018	NA	Sun BB	public	1	Males and Females	0	29875488	European		NA	Protein	Immune system	NA
prot-a-3216	Brorin	3301	10534735	2018	NA	Sun BB	public	1	Males and Females	0	29875488	European		NA	Protein	Immune system	NA
prot-a-322	Complement component C8	3301	10534735	2018	NA	Sun BB	public	1	Males and Females	0	29875488	European		NA	Protein	Immune system	NA
prot-a-3220	WD repeat-containing protein 1	3301	10534735	2018	NA	Sun BB	public	1	Males and Females	0	29875488	European		NA	Protein	Immune system	NA
prot-a-3223	WAP four-disulfide core domain protein 13	3301	10534735	2018	NA	Sun BB	public	1	Males and Females	0	29875488	European		NA	Protein	Immune system	NA
prot-a-3225	WAP four-disulfide core domain protein 3	3301	10534735	2018	NA	Sun BB	public	1	Males and Females	0	29875488	European		NA	Protein	Immune system	NA
prot-a-3227	WAP, kazal, immunoglobulin, kunitz and NTR domain-containing protein 1	3301	10534735	2018	NA	Sun BB	public	1	Males and Females	0	29875488	European		NA	Protein	Immune system	NA
prot-a-3228	WAP, Kazal, immunoglobulin, Kunitz and NTR domain-containing protein 2	3301	10534735	2018	NA	Sun BB	public	1	Males and Females	0	29875488	European		NA	Protein	Immune system	NA
prot-a-3229	WAP, Kazal, immunoglobulin, Kunitz and NTR domain-containing protein 2	3301	10534735	2018	NA	Sun BB	public	1	Males and Females	0	29875488	European		NA	Protein	Immune system	NA
prot-a-323	UPF0488 protein C8orf33	3301	10534735	2018	NA	Sun BB	public	1	Males and Females	0	29875488	European		NA	Protein	Immune system	NA
prot-a-3231	WNT1-inducible-signaling pathway protein 1	3301	10534735	2018	NA	Sun BB	public	1	Males and Females	0	29875488	European		NA	Protein	Immune system	NA
prot-a-3232	WNT1-inducible-signaling pathway protein 3	3301	10534735	2018	NA	Sun BB	public	1	Males and Females	0	29875488	European		NA	Protein	Immune system	NA
prot-a-3234	Protein Wnt-7a	3301	10534735	2018	NA	Sun BB	public	1	Males and Females	0	29875488	European		NA	Protein	Immune system	NA
prot-a-3237	Lymphotactin	3301	10534735	2018	NA	Sun BB	public	1	Males and Females	0	29875488	European		NA	Protein	Immune system	NA
prot-a-3239	Glycoprotein Xg	3301	10534735	2018	NA	Sun BB	public	1	Males and Females	0	29875488	European		NA	Protein	Immune system	NA
prot-a-3242	DNA repair protein XRCC4	3301	10534735	2018	NA	Sun BB	public	1	Males and Females	0	29875488	European		NA	Protein	Immune system	NA
prot-a-3243	Xyloside xylosyltransferase 1	3301	10534735	2018	NA	Sun BB	public	1	Males and Females	0	29875488	European		NA	Protein	Immune system	NA
prot-a-3244	Y-box-binding protein 2	3301	10534735	2018	NA	Sun BB	public	1	Males and Females	0	29875488	European		NA	Protein	Immune system	NA
prot-a-3248	14-3-3 protein family	3301	10534735	2018	NA	Sun BB	public	1	Males and Females	0	29875488	European		NA	Protein	Immune system	NA
prot-a-325	Bcl10-interacting CARD protein	3301	10534735	2018	NA	Sun BB	public	1	Males and Females	0	29875488	European		NA	Protein	Immune system	NA
prot-a-3251	14-3-3 protein zeta/delta	3301	10534735	2018	NA	Sun BB	public	1	Males and Females	0	29875488	European		NA	Protein	Immune system	NA
prot-a-3253	Tyrosine-protein kinase ZAP-70	3301	10534735	2018	NA	Sun BB	public	1	Males and Females	0	29875488	European		NA	Protein	Immune system	NA
prot-a-3254	Tyrosine-protein kinase ZAP-70	3301	10534735	2018	NA	Sun BB	public	1	Males and Females	0	29875488	European		NA	Protein	Immune system	NA
prot-a-3258	Zinc fingers and homeoboxes protein 3	3301	10534735	2018	NA	Sun BB	public	1	Males and Females	0	29875488	European		NA	Protein	Immune system	NA
prot-a-326	Carbonic anhydrase-related protein 10	3301	10534735	2018	NA	Sun BB	public	1	Males and Females	0	29875488	European		NA	Protein	Immune system	NA
prot-a-3262	Zinc finger protein 175	3301	10534735	2018	NA	Sun BB	public	1	Males and Females	0	29875488	European		NA	Protein	Immune system	NA
prot-a-3264	Zinc finger protein 18	3301	10534735	2018	NA	Sun BB	public	1	Males and Females	0	29875488	European		NA	Protein	Immune system	NA
prot-a-3267	Zinc finger protein 276	3301	10534735	2018	NA	Sun BB	public	1	Males and Females	0	29875488	European		NA	Protein	Immune system	NA
prot-a-327	Carbonic anhydrase-related protein 10	3301	10534735	2018	NA	Sun BB	public	1	Males and Females	0	29875488	European		NA	Protein	Immune system	NA
prot-a-3274	Zinc finger protein 566	3301	10534735	2018	NA	Sun BB	public	1	Males and Females	0	29875488	European		NA	Protein	Immune system	NA
prot-a-3276	Zinc finger protein 774	3301	10534735	2018	NA	Sun BB	public	1	Males and Females	0	29875488	European		NA	Protein	Immune system	NA
prot-a-3277	Zinc finger protein 843	3301	10534735	2018	NA	Sun BB	public	1	Males and Females	0	29875488	European		NA	Protein	Immune system	NA
prot-a-328	Carbonic anhydrase 1	3301	10534735	2018	NA	Sun BB	public	1	Males and Females	0	29875488	European		NA	Protein	Immune system	NA
prot-a-3280	Zinc/RING finger protein 4	3301	10534735	2018	NA	Sun BB	public	1	Males and Females	0	29875488	European		NA	Protein	Immune system	NA
prot-a-3281	Zona pellucida sperm-binding protein 4	3301	10534735	2018	NA	Sun BB	public	1	Males and Females	0	29875488	European		NA	Protein	Immune system	NA
prot-a-330	Carbonic anhydrase 3	3301	10534735	2018	NA	Sun BB	public	1	Males and Females	0	29875488	European		NA	Protein	Immune system	NA
prot-a-331	Carbonic anhydrase 4	3301	10534735	2018	NA	Sun BB	public	1	Males and Females	0	29875488	European		NA	Protein	Immune system	NA
prot-a-332	Carbonic anhydrase 5A, mitochondrial	3301	10534735	2018	NA	Sun BB	public	1	Males and Females	0	29875488	European		NA	Protein	Immune system	NA
prot-a-333	Carbonic anhydrase 6	3301	10534735	2018	NA	Sun BB	public	1	Males and Females	0	29875488	European		NA	Protein	Immune system	NA
prot-a-334	Carbonic anhydrase 9	3301	10534735	2018	NA	Sun BB	public	1	Males and Females	0	29875488	European		NA	Protein	Immune system	NA
prot-a-335	Voltage-dependent calcium channel subunit alpha-2/delta-3	3301	10534735	2018	NA	Sun BB	public	1	Males and Females	0	29875488	European		NA	Protein	Immune system	NA
prot-a-336	Calcyclin-binding protein	3301	10534735	2018	NA	Sun BB	public	1	Males and Females	0	29875488	European		NA	Protein	Immune system	NA
prot-a-341	Procalcitonin	3301	10534735	2018	NA	Sun BB	public	1	Males and Females	0	29875488	European		NA	Protein	Immune system	NA
prot-a-346	Calcium/calmodulin-dependent protein kinase type 1	3301	10534735	2018	NA	Sun BB	public	1	Males and Females	0	29875488	European		NA	Protein	Immune system	NA
prot-a-347	Calcium/calmodulin-dependent protein kinase type 1D	3301	10534735	2018	NA	Sun BB	public	1	Males and Females	0	29875488	European		NA	Protein	Immune system	NA
prot-a-348	Calcium/calmodulin-dependent protein kinase type II subunit alpha	3301	10534735	2018	NA	Sun BB	public	1	Males and Females	0	29875488	European		NA	Protein	Immune system	NA
prot-a-349	Calcium/calmodulin-dependent protein kinase type II subunit beta	3301	10534735	2018	NA	Sun BB	public	1	Males and Females	0	29875488	European		NA	Protein	Immune system	NA
prot-a-353	Calnexin	3301	10534735	2018	NA	Sun BB	public	1	Males and Females	0	29875488	European		NA	Protein	Immune system	NA
prot-a-354	Calpain-2 catalytic subunit	3301	10534735	2018	NA	Sun BB	public	1	Males and Females	0	29875488	European		NA	Protein	Immune system	NA
prot-a-36	A disintegrin and metalloproteinase with thrombospondin motifs 5	3301	10534735	2018	NA	Sun BB	public	1	Males and Females	0	29875488	European		NA	Protein	Immune system	NA
prot-a-362	Caspase-10	3301	10534735	2018	NA	Sun BB	public	1	Males and Females	0	29875488	European		NA	Protein	Immune system	NA
prot-a-366	Calpastatin	3301	10534735	2018	NA	Sun BB	public	1	Males and Females	0	29875488	European		NA	Protein	Immune system	NA
prot-a-367	Catalase	3301	10534735	2018	NA	Sun BB	public	1	Males and Females	0	29875488	European		NA	Protein	Immune system	NA
prot-a-369	Core-binding factor subunit beta	3301	10534735	2018	NA	Sun BB	public	1	Males and Females	0	29875488	European		NA	Protein	Immune system	NA
prot-a-37	A disintegrin and metalloproteinase with thrombospondin motifs 6	3301	10534735	2018	NA	Sun BB	public	1	Males and Females	0	29875488	European		NA	Protein	Immune system	NA
prot-a-370	E3 ubiquitin-protein ligase CBL	3301	10534735	2018	NA	Sun BB	public	1	Males and Females	0	29875488	European		NA	Protein	Immune system	NA
prot-a-371	Cerebellin-1	3301	10534735	2018	NA	Sun BB	public	1	Males and Females	0	29875488	European		NA	Protein	Immune system	NA
prot-a-372	Cerebellin-4	3301	10534735	2018	NA	Sun BB	public	1	Males and Females	0	29875488	European		NA	Protein	Immune system	NA
prot-a-373	Carbonyl reductase [NADPH] 1	3301	10534735	2018	NA	Sun BB	public	1	Males and Females	0	29875488	European		NA	Protein	Immune system	NA
prot-a-374	Carbonyl reductase [NADPH] 3	3301	10534735	2018	NA	Sun BB	public	1	Males and Females	0	29875488	European		NA	Protein	Immune system	NA
prot-a-376	Chromobox protein homolog 5	3301	10534735	2018	NA	Sun BB	public	1	Males and Females	0	29875488	European		NA	Protein	Immune system	NA
prot-a-380	Coiled-coil domain-containing protein 126	3301	10534735	2018	NA	Sun BB	public	1	Males and Females	0	29875488	European		NA	Protein	Immune system	NA
prot-a-381	Coiled-coil domain-containing protein 134	3301	10534735	2018	NA	Sun BB	public	1	Males and Females	0	29875488	European		NA	Protein	Immune system	NA
prot-a-387	Eotaxin	3301	10534735	2018	NA	Sun BB	public	1	Males and Females	0	29875488	European		NA	Protein	Immune system	NA
prot-a-388	C-C motif chemokine 1	3301	10534735	2018	NA	Sun BB	public	1	Males and Females	0	29875488	European		NA	Protein	Immune system	NA
prot-a-390	C-C motif chemokine 14	3301	10534735	2018	NA	Sun BB	public	1	Males and Females	0	29875488	European		NA	Protein	Immune system	NA
prot-a-391	C-C motif chemokine 15	3301	10534735	2018	NA	Sun BB	public	1	Males and Females	0	29875488	European		NA	Protein	Immune system	NA
prot-a-392	C-C motif chemokine 15	3301	10534735	2018	NA	Sun BB	public	1	Males and Females	0	29875488	European		NA	Protein	Immune system	NA
prot-a-393	C-C motif chemokine 16	3301	10534735	2018	NA	Sun BB	public	1	Males and Females	0	29875488	European		NA	Protein	Immune system	NA
prot-a-394	C-C motif chemokine 17	3301	10534735	2018	NA	Sun BB	public	1	Males and Females	0	29875488	European		NA	Protein	Immune system	NA
prot-a-395	C-C motif chemokine 19	3301	10534735	2018	NA	Sun BB	public	1	Males and Females	0	29875488	European		NA	Protein	Immune system	NA
prot-a-397	C-C motif chemokine 21	3301	10534735	2018	NA	Sun BB	public	1	Males and Females	0	29875488	European		NA	Protein	Immune system	NA
prot-a-398	C-C motif chemokine 22	3301	10534735	2018	NA	Sun BB	public	1	Males and Females	0	29875488	European		NA	Protein	Immune system	NA
prot-a-399	C-C motif chemokine 23	3301	10534735	2018	NA	Sun BB	public	1	Males and Females	0	29875488	European		NA	Protein	Immune system	NA
prot-a-400	Ck-beta-8-1	3301	10534735	2018	NA	Sun BB	public	1	Males and Females	0	29875488	European		NA	Protein	Immune system	NA
prot-a-401	C-C motif chemokine 24	3301	10534735	2018	NA	Sun BB	public	1	Males and Females	0	29875488	European		NA	Protein	Immune system	NA
prot-a-402	C-C motif chemokine 25	3301	10534735	2018	NA	Sun BB	public	1	Males and Females	0	29875488	European		NA	Protein	Immune system	NA
prot-a-403	C-C motif chemokine 25	3301	10534735	2018	NA	Sun BB	public	1	Males and Females	0	29875488	European		NA	Protein	Immune system	NA
prot-a-404	C-C motif chemokine 26	3301	10534735	2018	NA	Sun BB	public	1	Males and Females	0	29875488	European		NA	Protein	Immune system	NA
prot-a-405	C-C motif chemokine 27	3301	10534735	2018	NA	Sun BB	public	1	Males and Females	0	29875488	European		NA	Protein	Immune system	NA
prot-a-406	C-C motif chemokine 28	3301	10534735	2018	NA	Sun BB	public	1	Males and Females	0	29875488	European		NA	Protein	Immune system	NA
prot-a-407	C-C motif chemokine 3	3301	10534735	2018	NA	Sun BB	public	1	Males and Females	0	29875488	European		NA	Protein	Immune system	NA
prot-a-408	C-C motif chemokine 3-like 1	3301	10534735	2018	NA	Sun BB	public	1	Males and Females	0	29875488	European		NA	Protein	Immune system	NA
prot-a-409	C-C motif chemokine 5	3301	10534735	2018	NA	Sun BB	public	1	Males and Females	0	29875488	European		NA	Protein	Immune system	NA
prot-a-41	Pituitary adenylate cyclase-activating polypeptide 38	3301	10534735	2018	NA	Sun BB	public	1	Males and Females	0	29875488	European		NA	Protein	Immune system	NA
prot-a-410	C-C motif chemokine 7	3301	10534735	2018	NA	Sun BB	public	1	Males and Females	0	29875488	European		NA	Protein	Immune system	NA
prot-a-411	C-C motif chemokine 8	3301	10534735	2018	NA	Sun BB	public	1	Males and Females	0	29875488	European		NA	Protein	Immune system	NA
prot-a-412	Cerebral cavernous malformations 2 protein	3301	10534735	2018	NA	Sun BB	public	1	Males and Females	0	29875488	European		NA	Protein	Immune system	NA
prot-a-413	G2/mitotic-specific cyclin-B1	3301	10534735	2018	NA	Sun BB	public	1	Males and Females	0	29875488	European		NA	Protein	Immune system	NA
prot-a-415	Cyclin-C	3301	10534735	2018	NA	Sun BB	public	1	Males and Females	0	29875488	European		NA	Protein	Immune system	NA
prot-a-416	Cyclin-H	3301	10534735	2018	NA	Sun BB	public	1	Males and Females	0	29875488	European		NA	Protein	Immune system	NA
prot-a-417	Cell cycle progression protein 1	3301	10534735	2018	NA	Sun BB	public	1	Males and Females	0	29875488	European		NA	Protein	Immune system	NA
prot-a-418	CD109 antigen	3301	10534735	2018	NA	Sun BB	public	1	Males and Females	0	29875488	European		NA	Protein	Immune system	NA
prot-a-419	Scavenger receptor cysteine-rich type 1 protein M130	3301	10534735	2018	NA	Sun BB	public	1	Males and Females	0	29875488	European		NA	Protein	Immune system	NA
prot-a-420	CD177 antigen	3301	10534735	2018	NA	Sun BB	public	1	Males and Females	0	29875488	European		NA	Protein	Immune system	NA
prot-a-421	Antigen-presenting glycoprotein CD1d	3301	10534735	2018	NA	Sun BB	public	1	Males and Females	0	29875488	European		NA	Protein	Immune system	NA
prot-a-422	OX-2 membrane glycoprotein	3301	10534735	2018	NA	Sun BB	public	1	Males and Females	0	29875488	European		NA	Protein	Immune system	NA
prot-a-423	Cell surface glycoprotein CD200 receptor 1	3301	10534735	2018	NA	Sun BB	public	1	Males and Females	0	29875488	European		NA	Protein	Immune system	NA
prot-a-424	Cell surface glycoprotein CD200 receptor 2	3301	10534735	2018	NA	Sun BB	public	1	Males and Females	0	29875488	European		NA	Protein	Immune system	NA
prot-a-425	C-type lectin domain family 4 member K	3301	10534735	2018	NA	Sun BB	public	1	Males and Females	0	29875488	European		NA	Protein	Immune system	NA
prot-a-426	CD209 antigen	3301	10534735	2018	NA	Sun BB	public	1	Males and Females	0	29875488	European		NA	Protein	Immune system	NA
prot-a-427	B-cell receptor CD22	3301	10534735	2018	NA	Sun BB	public	1	Males and Females	0	29875488	European		NA	Protein	Immune system	NA
prot-a-428	CD226 antigen	3301	10534735	2018	NA	Sun BB	public	1	Males and Females	0	29875488	European		NA	Protein	Immune system	NA
prot-a-429	CD226 antigen	3301	10534735	2018	NA	Sun BB	public	1	Males and Females	0	29875488	European		NA	Protein	Immune system	NA
prot-a-43	Adhesion G-protein coupled receptor F1	3301	10534735	2018	NA	Sun BB	public	1	Males and Females	0	29875488	European		NA	Protein	Immune system	NA
prot-a-431	Programmed cell death 1 ligand 1	3301	10534735	2018	NA	Sun BB	public	1	Males and Females	0	29875488	European		NA	Protein	Immune system	NA
prot-a-432	CMRF35-like molecule 8	3301	10534735	2018	NA	Sun BB	public	1	Males and Females	0	29875488	European		NA	Protein	Immune system	NA
prot-a-433	CMRF35-like molecule 6	3301	10534735	2018	NA	Sun BB	public	1	Males and Females	0	29875488	European		NA	Protein	Immune system	NA
prot-a-434	CMRF35-like molecule 6	3301	10534735	2018	NA	Sun BB	public	1	Males and Females	0	29875488	European		NA	Protein	Immune system	NA
prot-a-439	Myeloid cell surface antigen CD33	3301	10534735	2018	NA	Sun BB	public	1	Males and Females	0	29875488	European		NA	Protein	Immune system	NA
prot-a-44	Adhesion G protein-coupled receptor F5	3301	10534735	2018	NA	Sun BB	public	1	Males and Females	0	29875488	European		NA	Protein	Immune system	NA
prot-a-440	Hematopoietic progenitor cell antigen CD34	3301	10534735	2018	NA	Sun BB	public	1	Males and Females	0	29875488	European		NA	Protein	Immune system	NA
prot-a-442	Platelet glycoprotein 4	3301	10534735	2018	NA	Sun BB	public	1	Males and Females	0	29875488	European		NA	Protein	Immune system	NA
prot-a-444	ADP-ribosyl cyclase/cyclic ADP-ribose hydrolase 1	3301	10534735	2018	NA	Sun BB	public	1	Males and Females	0	29875488	European		NA	Protein	Immune system	NA
prot-a-445	T-cell surface glycoprotein CD3 epsilon chain	3301	10534735	2018	NA	Sun BB	public	1	Males and Females	0	29875488	European		NA	Protein	Immune system	NA
prot-a-448	T-cell surface glycoprotein CD4	3301	10534735	2018	NA	Sun BB	public	1	Males and Females	0	29875488	European		NA	Protein	Immune system	NA
prot-a-453	Complement decay-accelerating factor	3301	10534735	2018	NA	Sun BB	public	1	Males and Females	0	29875488	European		NA	Protein	Immune system	NA
prot-a-454	Lymphocyte function-associated antigen 3	3301	10534735	2018	NA	Sun BB	public	1	Males and Females	0	29875488	European		NA	Protein	Immune system	NA
prot-a-455	CD59 glycoprotein	3301	10534735	2018	NA	Sun BB	public	1	Males and Females	0	29875488	European		NA	Protein	Immune system	NA
prot-a-456	CD63 antigen	3301	10534735	2018	NA	Sun BB	public	1	Males and Females	0	29875488	European		NA	Protein	Immune system	NA
prot-a-46	Alcohol dehydrogenase 1B	3301	10534735	2018	NA	Sun BB	public	1	Males and Females	0	29875488	European		NA	Protein	Immune system	NA
prot-a-462	B-cell antigen receptor complex-associated protein beta chain	3301	10534735	2018	NA	Sun BB	public	1	Males and Females	0	29875488	European		NA	Protein	Immune system	NA
prot-a-465	SLAM family member 5	3301	10534735	2018	NA	Sun BB	public	1	Males and Females	0	29875488	European		NA	Protein	Immune system	NA
prot-a-467	T-cell surface glycoprotein CD8 beta chain	3301	10534735	2018	NA	Sun BB	public	1	Males and Females	0	29875488	European		NA	Protein	Immune system	NA
prot-a-471	CD97 antigen	3301	10534735	2018	NA	Sun BB	public	1	Males and Females	0	29875488	European		NA	Protein	Immune system	NA
prot-a-472	M-phase inducer phosphatase 2	3301	10534735	2018	NA	Sun BB	public	1	Males and Females	0	29875488	European		NA	Protein	Immune system	NA
prot-a-476	Serine/threonine-protein kinase MRCK beta	3301	10534735	2018	NA	Sun BB	public	1	Males and Females	0	29875488	European		NA	Protein	Immune system	NA
prot-a-478	Cadherin-12	3301	10534735	2018	NA	Sun BB	public	1	Males and Females	0	29875488	European		NA	Protein	Immune system	NA
prot-a-48	Adrenomedullin	3301	10534735	2018	NA	Sun BB	public	1	Males and Females	0	29875488	European		NA	Protein	Immune system	NA
prot-a-480	Cadherin-1	3301	10534735	2018	NA	Sun BB	public	1	Males and Females	0	29875488	European		NA	Protein	Immune system	NA
prot-a-481	Cadherin-15	3301	10534735	2018	NA	Sun BB	public	1	Males and Females	0	29875488	European		NA	Protein	Immune system	NA
prot-a-483	Cadherin-2	3301	10534735	2018	NA	Sun BB	public	1	Males and Females	0	29875488	European		NA	Protein	Immune system	NA
prot-a-484	Cadherin-3	3301	10534735	2018	NA	Sun BB	public	1	Males and Females	0	29875488	European		NA	Protein	Immune system	NA
prot-a-485	Cadherin-5	3301	10534735	2018	NA	Sun BB	public	1	Males and Females	0	29875488	European		NA	Protein	Immune system	NA
prot-a-486	Cadherin-7	3301	10534735	2018	NA	Sun BB	public	1	Males and Females	0	29875488	European		NA	Protein	Immune system	NA
prot-a-490	Cadherin-related family member 5	3301	10534735	2018	NA	Sun BB	public	1	Males and Females	0	29875488	European		NA	Protein	Immune system	NA
prot-a-492	Cyclin-dependent kinase 2:Cyclin-A2 complex	3301	10534735	2018	NA	Sun BB	public	1	Males and Females	0	29875488	European		NA	Protein	Immune system	NA
prot-a-493	Cyclin-dependent kinase 5:Cyclin-dependent kinase 5 activator 1 complex	3301	10534735	2018	NA	Sun BB	public	1	Males and Females	0	29875488	European		NA	Protein	Immune system	NA
prot-a-494	Cyclin-dependent kinase 8:Cyclin-C complex	3301	10534735	2018	NA	Sun BB	public	1	Males and Females	0	29875488	European		NA	Protein	Immune system	NA
prot-a-498	Cerebral dopamine neurotrophic factor	3301	10534735	2018	NA	Sun BB	public	1	Males and Females	0	29875488	European		NA	Protein	Immune system	NA
prot-a-499	Cell adhesion molecule-related/down-regulated by oncogenes	3301	10534735	2018	NA	Sun BB	public	1	Males and Females	0	29875488	European		NA	Protein	Immune system	NA
prot-a-50	beta-adrenergic receptor kinase 1	3301	10534735	2018	NA	Sun BB	public	1	Males and Females	0	29875488	European		NA	Protein	Immune system	NA
prot-a-500	Corneodesmosin	3301	10534735	2018	NA	Sun BB	public	1	Males and Females	0	29875488	European		NA	Protein	Immune system	NA
prot-a-502	Carcinoembryonic antigen-related cell adhesion molecule 1	3301	10534735	2018	NA	Sun BB	public	1	Males and Females	0	29875488	European		NA	Protein	Immune system	NA
prot-a-507	Bile salt-activated lipase	3301	10534735	2018	NA	Sun BB	public	1	Males and Females	0	29875488	European		NA	Protein	Immune system	NA
prot-a-51	Adenylosuccinate synthetase isozyme 2	3301	10534735	2018	NA	Sun BB	public	1	Males and Females	0	29875488	European		NA	Protein	Immune system	NA
prot-a-511	Centromere protein W	3301	10534735	2018	NA	Sun BB	public	1	Males and Females	0	29875488	European		NA	Protein	Immune system	NA
prot-a-514	Centrosomal protein of 57 kDa	3301	10534735	2018	NA	Sun BB	public	1	Males and Females	0	29875488	European		NA	Protein	Immune system	NA
prot-a-516	Centrin-2	3301	10534735	2018	NA	Sun BB	public	1	Males and Females	0	29875488	European		NA	Protein	Immune system	NA
prot-a-518	Complement factor B	3301	10534735	2018	NA	Sun BB	public	1	Males and Females	0	29875488	European		NA	Protein	Immune system	NA
prot-a-519	Cryptic protein	3301	10534735	2018	NA	Sun BB	public	1	Males and Females	0	29875488	European		NA	Protein	Immune system	NA
prot-a-520	Complement factor H	3301	10534735	2018	NA	Sun BB	public	1	Males and Females	0	29875488	European		NA	Protein	Immune system	NA
prot-a-521	Complement factor H-related protein 5	3301	10534735	2018	NA	Sun BB	public	1	Males and Females	0	29875488	European		NA	Protein	Immune system	NA
prot-a-522	Complement factor H-related protein 5	3301	10534735	2018	NA	Sun BB	public	1	Males and Females	0	29875488	European		NA	Protein	Immune system	NA
prot-a-523	Complement factor I	3301	10534735	2018	NA	Sun BB	public	1	Males and Females	0	29875488	European		NA	Protein	Immune system	NA
prot-a-524	Cofilin-1	3301	10534735	2018	NA	Sun BB	public	1	Males and Females	0	29875488	European		NA	Protein	Immune system	NA
prot-a-525	Properdin	3301	10534735	2018	NA	Sun BB	public	1	Males and Females	0	29875488	European		NA	Protein	Immune system	NA
prot-a-527	Human Chorionic Gonadotropin	3301	10534735	2018	NA	Sun BB	public	1	Males and Females	0	29875488	European		NA	Protein	Immune system	NA
prot-a-528	Follicle stimulating hormone	3301	10534735	2018	NA	Sun BB	public	1	Males and Females	0	29875488	European		NA	Protein	Immune system	NA
prot-a-529	Luteinizing hormone	3301	10534735	2018	NA	Sun BB	public	1	Males and Females	0	29875488	European		NA	Protein	Immune system	NA
prot-a-53	alpha-Fetoprotein	3301	10534735	2018	NA	Sun BB	public	1	Males and Females	0	29875488	European		NA	Protein	Immune system	NA
prot-a-530	Thyroid Stimulating Hormone	3301	10534735	2018	NA	Sun BB	public	1	Males and Females	0	29875488	European		NA	Protein	Immune system	NA
prot-a-532	Cell growth regulator with EF hand domain protein 1	3301	10534735	2018	NA	Sun BB	public	1	Males and Females	0	29875488	European		NA	Protein	Immune system	NA
prot-a-534	Coiled-coil-helix-coiled-coil-helix domain-containing protein 10, mitochondrial	3301	10534735	2018	NA	Sun BB	public	1	Males and Females	0	29875488	European		NA	Protein	Immune system	NA
prot-a-538	Chromogranin-A	3301	10534735	2018	NA	Sun BB	public	1	Males and Females	0	29875488	European		NA	Protein	Immune system	NA
prot-a-539	Secretogranin-1	3301	10534735	2018	NA	Sun BB	public	1	Males and Females	0	29875488	European		NA	Protein	Immune system	NA
prot-a-54	Advanced glycosylation end product-specific receptor, soluble	3301	10534735	2018	NA	Sun BB	public	1	Males and Females	0	29875488	European		NA	Protein	Immune system	NA
prot-a-540	Chitinase-3-like protein 1	3301	10534735	2018	NA	Sun BB	public	1	Males and Females	0	29875488	European		NA	Protein	Immune system	NA
prot-a-541	Chitinase-3-like protein 2	3301	10534735	2018	NA	Sun BB	public	1	Males and Females	0	29875488	European		NA	Protein	Immune system	NA
prot-a-542	Cysteine-rich hydrophobic domain-containing protein 2	3301	10534735	2018	NA	Sun BB	public	1	Males and Females	0	29875488	European		NA	Protein	Immune system	NA
prot-a-543	Chitotriosidase-1	3301	10534735	2018	NA	Sun BB	public	1	Males and Females	0	29875488	European		NA	Protein	Immune system	NA
prot-a-544	Choline/ethanolamine kinase	3301	10534735	2018	NA	Sun BB	public	1	Males and Females	0	29875488	European		NA	Protein	Immune system	NA
prot-a-545	Neural cell adhesion molecule L1-like protein	3301	10534735	2018	NA	Sun BB	public	1	Males and Females	0	29875488	European		NA	Protein	Immune system	NA
prot-a-546	Calcineurin B homologous protein 1	3301	10534735	2018	NA	Sun BB	public	1	Males and Females	0	29875488	European		NA	Protein	Immune system	NA
prot-a-547	Chordin	3301	10534735	2018	NA	Sun BB	public	1	Males and Females	0	29875488	European		NA	Protein	Immune system	NA
prot-a-549	Chordin-like protein 2	3301	10534735	2018	NA	Sun BB	public	1	Males and Females	0	29875488	European		NA	Protein	Immune system	NA
prot-a-55	Arf-GAP domain and FG repeat-containing protein 1	3301	10534735	2018	NA	Sun BB	public	1	Males and Females	0	29875488	European		NA	Protein	Immune system	NA
prot-a-550	Carbohydrate sulfotransferase 11	3301	10534735	2018	NA	Sun BB	public	1	Males and Females	0	29875488	European		NA	Protein	Immune system	NA
prot-a-552	Carbohydrate sulfotransferase 15	3301	10534735	2018	NA	Sun BB	public	1	Males and Females	0	29875488	European		NA	Protein	Immune system	NA
prot-a-553	Carbohydrate sulfotransferase 15	3301	10534735	2018	NA	Sun BB	public	1	Males and Females	0	29875488	European		NA	Protein	Immune system	NA
prot-a-554	Carbohydrate sulfotransferase 1	3301	10534735	2018	NA	Sun BB	public	1	Males and Females	0	29875488	European		NA	Protein	Immune system	NA
prot-a-56	Angiogenic factor with G patch and FHA domains 1	3301	10534735	2018	NA	Sun BB	public	1	Males and Females	0	29875488	European		NA	Protein	Immune system	NA
prot-a-560	Cartilage intermediate layer protein 1	3301	10534735	2018	NA	Sun BB	public	1	Males and Females	0	29875488	European		NA	Protein	Immune system	NA
prot-a-561	Cold-inducible RNA-binding protein	3301	10534735	2018	NA	Sun BB	public	1	Males and Females	0	29875488	European		NA	Protein	Immune system	NA
prot-a-562	CDGSH iron-sulfur domain-containing protein 1	3301	10534735	2018	NA	Sun BB	public	1	Males and Females	0	29875488	European		NA	Protein	Immune system	NA
prot-a-564	Cytoskeleton-associated protein 2	3301	10534735	2018	NA	Sun BB	public	1	Males and Females	0	29875488	European		NA	Protein	Immune system	NA
prot-a-566	Creatine kinase M-type	3301	10534735	2018	NA	Sun BB	public	1	Males and Females	0	29875488	European		NA	Protein	Immune system	NA
prot-a-568	C-type lectin domain family 10 member A	3301	10534735	2018	NA	Sun BB	public	1	Males and Females	0	29875488	European		NA	Protein	Immune system	NA
prot-a-569	Stem Cell Growth Factor-beta	3301	10534735	2018	NA	Sun BB	public	1	Males and Females	0	29875488	European		NA	Protein	Immune system	NA
prot-a-570	C-type lectin domain family 12 member A	3301	10534735	2018	NA	Sun BB	public	1	Males and Females	0	29875488	European		NA	Protein	Immune system	NA
prot-a-572	C-type lectin domain family 2 member A	3301	10534735	2018	NA	Sun BB	public	1	Males and Females	0	29875488	European		NA	Protein	Immune system	NA
prot-a-574	C-type lectin domain family 2 member D	3301	10534735	2018	NA	Sun BB	public	1	Males and Females	0	29875488	European		NA	Protein	Immune system	NA
prot-a-575	C-type lectin domain family 2 member L	3301	10534735	2018	NA	Sun BB	public	1	Males and Females	0	29875488	European		NA	Protein	Immune system	NA
prot-a-577	C-type lectin domain family 4 member E	3301	10534735	2018	NA	Sun BB	public	1	Males and Females	0	29875488	European		NA	Protein	Immune system	NA
prot-a-579	C-type lectin domain family 5 member A	3301	10534735	2018	NA	Sun BB	public	1	Males and Females	0	29875488	European		NA	Protein	Immune system	NA
prot-a-581	C-type lectin domain family 7 member A	3301	10534735	2018	NA	Sun BB	public	1	Males and Females	0	29875488	European		NA	Protein	Immune system	NA
prot-a-584	Chloride intracellular channel protein 5	3301	10534735	2018	NA	Sun BB	public	1	Males and Females	0	29875488	European		NA	Protein	Immune system	NA
prot-a-585	Clathrin interactor 1	3301	10534735	2018	NA	Sun BB	public	1	Males and Females	0	29875488	European		NA	Protein	Immune system	NA
prot-a-586	Dual specificity protein kinase CLK2	3301	10534735	2018	NA	Sun BB	public	1	Males and Females	0	29875488	European		NA	Protein	Immune system	NA
prot-a-587	CXADR-like membrane protein	3301	10534735	2018	NA	Sun BB	public	1	Males and Females	0	29875488	European		NA	Protein	Immune system	NA
prot-a-59	Agouti-related protein	3301	10534735	2018	NA	Sun BB	public	1	Males and Females	0	29875488	European		NA	Protein	Immune system	NA
prot-a-592	Colipase	3301	10534735	2018	NA	Sun BB	public	1	Males and Females	0	29875488	European		NA	Protein	Immune system	NA
prot-a-594	Calsyntenin-3	3301	10534735	2018	NA	Sun BB	public	1	Males and Females	0	29875488	European		NA	Protein	Immune system	NA
prot-a-599	UMP-CMP kinase	3301	10534735	2018	NA	Sun BB	public	1	Males and Females	0	29875488	European		NA	Protein	Immune system	NA
prot-a-6	Alpha/beta hydrolase domain-containing protein 14A	3301	10534735	2018	NA	Sun BB	public	1	Males and Females	0	29875488	European		NA	Protein	Immune system	NA
prot-a-600	Cytosolic non-specific dipeptidase	3301	10534735	2018	NA	Sun BB	public	1	Males and Females	0	29875488	European		NA	Protein	Immune system	NA
prot-a-604	Ciliary neurotrophic factor	3301	10534735	2018	NA	Sun BB	public	1	Males and Females	0	29875488	European		NA	Protein	Immune system	NA
prot-a-605	Ciliary neurotrophic factor receptor subunit alpha	3301	10534735	2018	NA	Sun BB	public	1	Males and Females	0	29875488	European		NA	Protein	Immune system	NA
prot-a-607	Contactin-2	3301	10534735	2018	NA	Sun BB	public	1	Males and Females	0	29875488	European		NA	Protein	Immune system	NA
prot-a-608	Contactin-4	3301	10534735	2018	NA	Sun BB	public	1	Males and Females	0	29875488	European		NA	Protein	Immune system	NA
prot-a-609	Contactin-5	3301	10534735	2018	NA	Sun BB	public	1	Males and Females	0	29875488	European		NA	Protein	Immune system	NA
prot-a-61	Alpha-2-HS-glycoprotein	3301	10534735	2018	NA	Sun BB	public	1	Males and Females	0	29875488	European		NA	Protein	Immune system	NA
prot-a-612	Cytochrome c oxidase assembly factor 3 homolog, mitochondrial	3301	10534735	2018	NA	Sun BB	public	1	Males and Females	0	29875488	European		NA	Protein	Immune system	NA
prot-a-613	Cochlin	3301	10534735	2018	NA	Sun BB	public	1	Males and Females	0	29875488	European		NA	Protein	Immune system	NA
prot-a-615	Collagen alpha-2(XI) chain	3301	10534735	2018	NA	Sun BB	public	1	Males and Females	0	29875488	European		NA	Protein	Immune system	NA
prot-a-616	Collagen alpha-1(XV) chain	3301	10534735	2018	NA	Sun BB	public	1	Males and Females	0	29875488	European		NA	Protein	Immune system	NA
prot-a-617	Endostatin	3301	10534735	2018	NA	Sun BB	public	1	Males and Females	0	29875488	European		NA	Protein	Immune system	NA
prot-a-618	Collagen alpha-1(I) chain	3301	10534735	2018	NA	Sun BB	public	1	Males and Females	0	29875488	European		NA	Protein	Immune system	NA
prot-a-62	Allograft inflammatory factor 1	3301	10534735	2018	NA	Sun BB	public	1	Males and Females	0	29875488	European		NA	Protein	Immune system	NA
prot-a-621	Collagen alpha-1(XXVIII) chain	3301	10534735	2018	NA	Sun BB	public	1	Males and Females	0	29875488	European		NA	Protein	Immune system	NA
prot-a-623	Collagen alpha-3(VI) chain	3301	10534735	2018	NA	Sun BB	public	1	Males and Females	0	29875488	European		NA	Protein	Immune system	NA
prot-a-626	Collagen alpha-2(IX) chain	3301	10534735	2018	NA	Sun BB	public	1	Males and Females	0	29875488	European		NA	Protein	Immune system	NA
prot-a-627	Collectin-10	3301	10534735	2018	NA	Sun BB	public	1	Males and Females	0	29875488	European		NA	Protein	Immune system	NA
prot-a-628	Collectin-11	3301	10534735	2018	NA	Sun BB	public	1	Males and Females	0	29875488	European		NA	Protein	Immune system	NA
prot-a-629	Collectin-12	3301	10534735	2018	NA	Sun BB	public	1	Males and Females	0	29875488	European		NA	Protein	Immune system	NA
prot-a-63	Apoptosis-inducing factor 1, mitochondrial	3301	10534735	2018	NA	Sun BB	public	1	Males and Females	0	29875488	European		NA	Protein	Immune system	NA
prot-a-631	Procollagen galactosyltransferase 1	3301	10534735	2018	NA	Sun BB	public	1	Males and Females	0	29875488	European		NA	Protein	Immune system	NA
prot-a-635	COP9 signalosome complex subunit 2	3301	10534735	2018	NA	Sun BB	public	1	Males and Females	0	29875488	European		NA	Protein	Immune system	NA
prot-a-637	Cytochrome c oxidase subunit 4 isoform 2, mitochondrial	3301	10534735	2018	NA	Sun BB	public	1	Males and Females	0	29875488	European		NA	Protein	Immune system	NA
prot-a-641	Cytochrome c oxidase subunit 8A, mitochondrial	3301	10534735	2018	NA	Sun BB	public	1	Males and Females	0	29875488	European		NA	Protein	Immune system	NA
prot-a-642	Carboxypeptidase A2	3301	10534735	2018	NA	Sun BB	public	1	Males and Females	0	29875488	European		NA	Protein	Immune system	NA
prot-a-643	Carboxypeptidase A4	3301	10534735	2018	NA	Sun BB	public	1	Males and Females	0	29875488	European		NA	Protein	Immune system	NA
prot-a-644	Carboxypeptidase B	3301	10534735	2018	NA	Sun BB	public	1	Males and Females	0	29875488	European		NA	Protein	Immune system	NA
prot-a-646	Copine-1	3301	10534735	2018	NA	Sun BB	public	1	Males and Females	0	29875488	European		NA	Protein	Immune system	NA
prot-a-647	Probable serine carboxypeptidase CPVL	3301	10534735	2018	NA	Sun BB	public	1	Males and Females	0	29875488	European		NA	Protein	Immune system	NA
prot-a-649	Carboxypeptidase Z	3301	10534735	2018	NA	Sun BB	public	1	Males and Females	0	29875488	European		NA	Protein	Immune system	NA
prot-a-65	Endothelial monocyte-activating polypeptide 2	3301	10534735	2018	NA	Sun BB	public	1	Males and Females	0	29875488	European		NA	Protein	Immune system	NA
prot-a-650	Cellular retinoic acid-binding protein 1	3301	10534735	2018	NA	Sun BB	public	1	Males and Females	0	29875488	European		NA	Protein	Immune system	NA
prot-a-654	Cyclic AMP-responsive element-binding protein 3-like protein 4	3301	10534735	2018	NA	Sun BB	public	1	Males and Females	0	29875488	European		NA	Protein	Immune system	NA
prot-a-655	CREB-binding protein	3301	10534735	2018	NA	Sun BB	public	1	Males and Females	0	29875488	European		NA	Protein	Immune system	NA
prot-a-656	Protein CREG1	3301	10534735	2018	NA	Sun BB	public	1	Males and Females	0	29875488	European		NA	Protein	Immune system	NA
prot-a-657	Cysteine-rich with EGF-like domain protein 1	3301	10534735	2018	NA	Sun BB	public	1	Males and Females	0	29875488	European		NA	Protein	Immune system	NA
prot-a-659	Corticotropin-releasing factor-binding protein	3301	10534735	2018	NA	Sun BB	public	1	Males and Females	0	29875488	European		NA	Protein	Immune system	NA
prot-a-660	Cysteine-rich motor neuron 1 protein	3301	10534735	2018	NA	Sun BB	public	1	Males and Females	0	29875488	European		NA	Protein	Immune system	NA
prot-a-661	Cysteine-rich secretory protein 2	3301	10534735	2018	NA	Sun BB	public	1	Males and Females	0	29875488	European		NA	Protein	Immune system	NA
prot-a-662	Cysteine-rich secretory protein 3	3301	10534735	2018	NA	Sun BB	public	1	Males and Females	0	29875488	European		NA	Protein	Immune system	NA
prot-a-663	Cysteine-rich secretory protein LCCL domain-containing 2	3301	10534735	2018	NA	Sun BB	public	1	Males and Females	0	29875488	European		NA	Protein	Immune system	NA
prot-a-665	Crk-like protein	3301	10534735	2018	NA	Sun BB	public	1	Males and Females	0	29875488	European		NA	Protein	Immune system	NA
prot-a-67	Alcohol dehydrogenase [NADP(+)]	3301	10534735	2018	NA	Sun BB	public	1	Males and Females	0	29875488	European		NA	Protein	Immune system	NA
prot-a-670	C-reactive protein	3301	10534735	2018	NA	Sun BB	public	1	Males and Females	0	29875488	European		NA	Protein	Immune system	NA
prot-a-674	Beta-crystallin B2	3301	10534735	2018	NA	Sun BB	public	1	Males and Females	0	29875488	European		NA	Protein	Immune system	NA
prot-a-675	Gamma-crystallin D	3301	10534735	2018	NA	Sun BB	public	1	Males and Females	0	29875488	European		NA	Protein	Immune system	NA
prot-a-676	Quinone oxidoreductase-like protein 1	3301	10534735	2018	NA	Sun BB	public	1	Males and Females	0	29875488	European		NA	Protein	Immune system	NA
prot-a-678	Cold shock domain-containing protein C2	3301	10534735	2018	NA	Sun BB	public	1	Males and Females	0	29875488	European		NA	Protein	Immune system	NA
prot-a-68	Aldose reductase	3301	10534735	2018	NA	Sun BB	public	1	Males and Females	0	29875488	European		NA	Protein	Immune system	NA
prot-a-681	Granulocyte-macrophage colony-stimulating factor	3301	10534735	2018	NA	Sun BB	public	1	Males and Females	0	29875488	European		NA	Protein	Immune system	NA
prot-a-683	Cytokine receptor common subunit beta	3301	10534735	2018	NA	Sun BB	public	1	Males and Females	0	29875488	European		NA	Protein	Immune system	NA
prot-a-686	Granulocyte colony-stimulating factor receptor	3301	10534735	2018	NA	Sun BB	public	1	Males and Females	0	29875488	European		NA	Protein	Immune system	NA
prot-a-687	Chondroitin sulfate N-acetylgalactosaminyltransferase 2	3301	10534735	2018	NA	Sun BB	public	1	Males and Females	0	29875488	European		NA	Protein	Immune system	NA
prot-a-689	Tyrosine-protein kinase CSK	3301	10534735	2018	NA	Sun BB	public	1	Males and Females	0	29875488	European		NA	Protein	Immune system	NA
prot-a-69	Aldo-keto reductase family 1 member C1	3301	10534735	2018	NA	Sun BB	public	1	Males and Females	0	29875488	European		NA	Protein	Immune system	NA
prot-a-690	CUB and sushi domain-containing protein 1	3301	10534735	2018	NA	Sun BB	public	1	Males and Females	0	29875488	European		NA	Protein	Immune system	NA
prot-a-691	CUB and sushi domain-containing protein 2	3301	10534735	2018	NA	Sun BB	public	1	Males and Females	0	29875488	European		NA	Protein	Immune system	NA
prot-a-693	Casein kinase I isoform delta	3301	10534735	2018	NA	Sun BB	public	1	Males and Females	0	29875488	European		NA	Protein	Immune system	NA
prot-a-694	Casein kinase I isoform gamma-2	3301	10534735	2018	NA	Sun BB	public	1	Males and Females	0	29875488	European		NA	Protein	Immune system	NA
prot-a-697	Casein kinase II 2-alpha:2-beta heterotetramer	3301	10534735	2018	NA	Sun BB	public	1	Males and Females	0	29875488	European		NA	Protein	Immune system	NA
prot-a-703	Cystatin-M	3301	10534735	2018	NA	Sun BB	public	1	Males and Females	0	29875488	European		NA	Protein	Immune system	NA
prot-a-704	Cystatin-M	3301	10534735	2018	NA	Sun BB	public	1	Males and Females	0	29875488	European		NA	Protein	Immune system	NA
prot-a-705	Cystatin-F	3301	10534735	2018	NA	Sun BB	public	1	Males and Females	0	29875488	European		NA	Protein	Immune system	NA
prot-a-706	Cystatin-8	3301	10534735	2018	NA	Sun BB	public	1	Males and Females	0	29875488	European		NA	Protein	Immune system	NA
prot-a-708	Di-N-acetylchitobiase	3301	10534735	2018	NA	Sun BB	public	1	Males and Females	0	29875488	European		NA	Protein	Immune system	NA
prot-a-71	RAC-alpha/beta/gamma serine/threonine-protein kinase	3301	10534735	2018	NA	Sun BB	public	1	Males and Females	0	29875488	European		NA	Protein	Immune system	NA
prot-a-710	Cardiotrophin-1	3301	10534735	2018	NA	Sun BB	public	1	Males and Females	0	29875488	European		NA	Protein	Immune system	NA
prot-a-711	Cardiotrophin-1	3301	10534735	2018	NA	Sun BB	public	1	Males and Females	0	29875488	European		NA	Protein	Immune system	NA
prot-a-714	Chymotrypsinogen B	3301	10534735	2018	NA	Sun BB	public	1	Males and Females	0	29875488	European		NA	Protein	Immune system	NA
prot-a-716	Chymotrypsin-like protease CTRL-1	3301	10534735	2018	NA	Sun BB	public	1	Males and Females	0	29875488	European		NA	Protein	Immune system	NA
prot-a-717	Lysosomal protective protein	3301	10534735	2018	NA	Sun BB	public	1	Males and Females	0	29875488	European		NA	Protein	Immune system	NA
prot-a-718	Cathepsin B	3301	10534735	2018	NA	Sun BB	public	1	Males and Females	0	29875488	European		NA	Protein	Immune system	NA
prot-a-722	Cathepsin F	3301	10534735	2018	NA	Sun BB	public	1	Males and Females	0	29875488	European		NA	Protein	Immune system	NA
prot-a-725	Cathepsin H	3301	10534735	2018	NA	Sun BB	public	1	Males and Females	0	29875488	European		NA	Protein	Immune system	NA
prot-a-727	Cathepsin S	3301	10534735	2018	NA	Sun BB	public	1	Males and Females	0	29875488	European		NA	Protein	Immune system	NA
prot-a-729	Cathepsin Z	3301	10534735	2018	NA	Sun BB	public	1	Males and Females	0	29875488	European		NA	Protein	Immune system	NA
prot-a-73	RAC-beta serine/threonine-protein kinase	3301	10534735	2018	NA	Sun BB	public	1	Males and Females	0	29875488	European		NA	Protein	Immune system	NA
prot-a-730	Cortexin-3	3301	10534735	2018	NA	Sun BB	public	1	Males and Females	0	29875488	European		NA	Protein	Immune system	NA
prot-a-732	Cullin-3	3301	10534735	2018	NA	Sun BB	public	1	Males and Females	0	29875488	European		NA	Protein	Immune system	NA
prot-a-735	CUB and zona pellucida-like domain-containing protein 1	3301	10534735	2018	NA	Sun BB	public	1	Males and Females	0	29875488	European		NA	Protein	Immune system	NA
prot-a-736	Fractalkine	3301	10534735	2018	NA	Sun BB	public	1	Males and Females	0	29875488	European		NA	Protein	Immune system	NA
prot-a-739	C-X-C motif chemokine 11	3301	10534735	2018	NA	Sun BB	public	1	Males and Females	0	29875488	European		NA	Protein	Immune system	NA
prot-a-74	CD166 antigen	3301	10534735	2018	NA	Sun BB	public	1	Males and Females	0	29875488	European		NA	Protein	Immune system	NA
prot-a-740	Stromal cell-derived factor 1	3301	10534735	2018	NA	Sun BB	public	1	Males and Females	0	29875488	European		NA	Protein	Immune system	NA
prot-a-741	Stromal cell-derived factor 1	3301	10534735	2018	NA	Sun BB	public	1	Males and Females	0	29875488	European		NA	Protein	Immune system	NA
prot-a-745	C-X-C motif chemokine 16	3301	10534735	2018	NA	Sun BB	public	1	Males and Females	0	29875488	European		NA	Protein	Immune system	NA
prot-a-746	Gro-beta/gamma	3301	10534735	2018	NA	Sun BB	public	1	Males and Females	0	29875488	European		NA	Protein	Immune system	NA
prot-a-748	C-X-C motif chemokine 5	3301	10534735	2018	NA	Sun BB	public	1	Males and Females	0	29875488	European		NA	Protein	Immune system	NA
prot-a-75	Aldehyde dehydrogenase, dimeric NADP-preferring	3301	10534735	2018	NA	Sun BB	public	1	Males and Females	0	29875488	European		NA	Protein	Immune system	NA
prot-a-754	Cytochrome c	3301	10534735	2018	NA	Sun BB	public	1	Males and Females	0	29875488	European		NA	Protein	Immune system	NA
prot-a-755	Cytoglobin	3301	10534735	2018	NA	Sun BB	public	1	Males and Females	0	29875488	European		NA	Protein	Immune system	NA
prot-a-759	Cytohesin-2	3301	10534735	2018	NA	Sun BB	public	1	Males and Females	0	29875488	European		NA	Protein	Immune system	NA
prot-a-76	Aldehyde dehydrogenase family 3 member B1	3301	10534735	2018	NA	Sun BB	public	1	Males and Females	0	29875488	European		NA	Protein	Immune system	NA
prot-a-760	Cytohesin-4	3301	10534735	2018	NA	Sun BB	public	1	Males and Females	0	29875488	European		NA	Protein	Immune system	NA
prot-a-762	Dystroglycan	3301	10534735	2018	NA	Sun BB	public	1	Males and Females	0	29875488	European		NA	Protein	Immune system	NA
prot-a-763	Death-associated protein kinase 2	3301	10534735	2018	NA	Sun BB	public	1	Males and Females	0	29875488	European		NA	Protein	Immune system	NA
prot-a-764	Drebrin-like protein	3301	10534735	2018	NA	Sun BB	public	1	Males and Females	0	29875488	European		NA	Protein	Immune system	NA
prot-a-766	Discoidin, CUB and LCCL domain-containing protein 2	3301	10534735	2018	NA	Sun BB	public	1	Males and Females	0	29875488	European		NA	Protein	Immune system	NA
prot-a-767	Deoxycytidine kinase	3301	10534735	2018	NA	Sun BB	public	1	Males and Females	0	29875488	European		NA	Protein	Immune system	NA
prot-a-77	Fructose-bisphosphate aldolase A	3301	10534735	2018	NA	Sun BB	public	1	Males and Females	0	29875488	European		NA	Protein	Immune system	NA
prot-a-771	Dynactin subunit 2	3301	10534735	2018	NA	Sun BB	public	1	Males and Females	0	29875488	European		NA	Protein	Immune system	NA
prot-a-773	DCN1-like protein 3	3301	10534735	2018	NA	Sun BB	public	1	Males and Females	0	29875488	European		NA	Protein	Immune system	NA
prot-a-774	DCN1-like protein 5	3301	10534735	2018	NA	Sun BB	public	1	Males and Females	0	29875488	European		NA	Protein	Immune system	NA
prot-a-776	Discoidin domain-containing receptor 2	3301	10534735	2018	NA	Sun BB	public	1	Males and Females	0	29875488	European		NA	Protein	Immune system	NA
prot-a-777	ATP-dependent RNA helicase DDX25	3301	10534735	2018	NA	Sun BB	public	1	Males and Females	0	29875488	European		NA	Protein	Immune system	NA
prot-a-778	Spliceosome RNA helicase DDX39B	3301	10534735	2018	NA	Sun BB	public	1	Males and Females	0	29875488	European		NA	Protein	Immune system	NA
prot-a-779	Probable ATP-dependent RNA helicase DDX58	3301	10534735	2018	NA	Sun BB	public	1	Males and Females	0	29875488	European		NA	Protein	Immune system	NA
prot-a-780	Deformed epidermal autoregulatory factor 1 homolog	3301	10534735	2018	NA	Sun BB	public	1	Males and Females	0	29875488	European		NA	Protein	Immune system	NA
prot-a-782	Beta-defensin 104	3301	10534735	2018	NA	Sun BB	public	1	Males and Females	0	29875488	European		NA	Protein	Immune system	NA
prot-a-783	Beta-defensin 105	3301	10534735	2018	NA	Sun BB	public	1	Males and Females	0	29875488	European		NA	Protein	Immune system	NA
prot-a-784	Beta-defensin 106	3301	10534735	2018	NA	Sun BB	public	1	Males and Females	0	29875488	European		NA	Protein	Immune system	NA
prot-a-786	Beta-defensin 108B	3301	10534735	2018	NA	Sun BB	public	1	Males and Females	0	29875488	European		NA	Protein	Immune system	NA
prot-a-788	Beta-defensin 112	3301	10534735	2018	NA	Sun BB	public	1	Males and Females	0	29875488	European		NA	Protein	Immune system	NA
prot-a-789	Beta-defensin 113	3301	10534735	2018	NA	Sun BB	public	1	Males and Females	0	29875488	European		NA	Protein	Immune system	NA
prot-a-792	Beta-defensin 118	3301	10534735	2018	NA	Sun BB	public	1	Males and Females	0	29875488	European		NA	Protein	Immune system	NA
prot-a-794	Beta-defensin 119	3301	10534735	2018	NA	Sun BB	public	1	Males and Females	0	29875488	European		NA	Protein	Immune system	NA
prot-a-795	Beta-defensin 119	3301	10534735	2018	NA	Sun BB	public	1	Males and Females	0	29875488	European		NA	Protein	Immune system	NA
prot-a-796	Beta-defensin 119	3301	10534735	2018	NA	Sun BB	public	1	Males and Females	0	29875488	European		NA	Protein	Immune system	NA
prot-a-797	Beta-defensin 121	3301	10534735	2018	NA	Sun BB	public	1	Males and Females	0	29875488	European		NA	Protein	Immune system	NA
prot-a-799	Beta-defensin 125	3301	10534735	2018	NA	Sun BB	public	1	Males and Females	0	29875488	European		NA	Protein	Immune system	NA
prot-a-8	Abelson tyrosine-protein kinase 2	3301	10534735	2018	NA	Sun BB	public	1	Males and Females	0	29875488	European		NA	Protein	Immune system	NA
prot-a-80	Arachidonate 15-lipoxygenase B	3301	10534735	2018	NA	Sun BB	public	1	Males and Females	0	29875488	European		NA	Protein	Immune system	NA
prot-a-800	Beta-defensin 128	3301	10534735	2018	NA	Sun BB	public	1	Males and Females	0	29875488	European		NA	Protein	Immune system	NA
prot-a-801	Beta-defensin 134	3301	10534735	2018	NA	Sun BB	public	1	Males and Females	0	29875488	European		NA	Protein	Immune system	NA
prot-a-804	Beta-defensin 1	3301	10534735	2018	NA	Sun BB	public	1	Males and Females	0	29875488	European		NA	Protein	Immune system	NA
prot-a-805	Protein DEPP	3301	10534735	2018	NA	Sun BB	public	1	Males and Females	0	29875488	European		NA	Protein	Immune system	NA
prot-a-808	Protein DGCR14	3301	10534735	2018	NA	Sun BB	public	1	Males and Females	0	29875488	European		NA	Protein	Immune system	NA
prot-a-812	Dihydrofolate reductase	3301	10534735	2018	NA	Sun BB	public	1	Males and Females	0	29875488	European		NA	Protein	Immune system	NA
prot-a-814	Pre-mRNA-splicing factor ATP-dependent RNA helicase PRP16	3301	10534735	2018	NA	Sun BB	public	1	Males and Females	0	29875488	European		NA	Protein	Immune system	NA
prot-a-815	Probable ATP-dependent RNA helicase DHX58	3301	10534735	2018	NA	Sun BB	public	1	Males and Females	0	29875488	European		NA	Protein	Immune system	NA
prot-a-816	ATP-dependent RNA helicase DHX8	3301	10534735	2018	NA	Sun BB	public	1	Males and Females	0	29875488	European		NA	Protein	Immune system	NA
prot-a-818	Diablo homolog, mitochondrial	3301	10534735	2018	NA	Sun BB	public	1	Males and Females	0	29875488	European		NA	Protein	Immune system	NA
prot-a-819	Probable dimethyladenosine transferase	3301	10534735	2018	NA	Sun BB	public	1	Males and Females	0	29875488	European		NA	Protein	Immune system	NA
prot-a-82	Ameloblastin	3301	10534735	2018	NA	Sun BB	public	1	Males and Females	0	29875488	European		NA	Protein	Immune system	NA
prot-a-821	Dickkopf-related protein 1	3301	10534735	2018	NA	Sun BB	public	1	Males and Females	0	29875488	European		NA	Protein	Immune system	NA
prot-a-822	Dickkopf-related protein 3	3301	10534735	2018	NA	Sun BB	public	1	Males and Females	0	29875488	European		NA	Protein	Immune system	NA
prot-a-823	Dickkopf-related protein 4	3301	10534735	2018	NA	Sun BB	public	1	Males and Females	0	29875488	European		NA	Protein	Immune system	NA
prot-a-824	Dickkopf-like protein 1	3301	10534735	2018	NA	Sun BB	public	1	Males and Females	0	29875488	European		NA	Protein	Immune system	NA
prot-a-828	Protein delta homolog 1	3301	10534735	2018	NA	Sun BB	public	1	Males and Females	0	29875488	European		NA	Protein	Immune system	NA
prot-a-829	Protein delta homolog 2	3301	10534735	2018	NA	Sun BB	public	1	Males and Females	0	29875488	European		NA	Protein	Immune system	NA
prot-a-83	Amelogenin, X isoform	3301	10534735	2018	NA	Sun BB	public	1	Males and Females	0	29875488	European		NA	Protein	Immune system	NA
prot-a-830	Delta-like protein 1	3301	10534735	2018	NA	Sun BB	public	1	Males and Females	0	29875488	European		NA	Protein	Immune system	NA
prot-a-831	Delta-like protein 1	3301	10534735	2018	NA	Sun BB	public	1	Males and Females	0	29875488	European		NA	Protein	Immune system	NA
prot-a-835	DnaJ homolog subfamily A member 4	3301	10534735	2018	NA	Sun BB	public	1	Males and Females	0	29875488	European		NA	Protein	Immune system	NA
prot-a-836	DnaJ homolog subfamily B member 11	3301	10534735	2018	NA	Sun BB	public	1	Males and Females	0	29875488	European		NA	Protein	Immune system	NA
prot-a-840	DnaJ homolog subfamily B member 14	3301	10534735	2018	NA	Sun BB	public	1	Males and Females	0	29875488	European		NA	Protein	Immune system	NA
prot-a-841	DnaJ homolog subfamily B member 2	3301	10534735	2018	NA	Sun BB	public	1	Males and Females	0	29875488	European		NA	Protein	Immune system	NA
prot-a-842	DnaJ homolog subfamily B member 9	3301	10534735	2018	NA	Sun BB	public	1	Males and Females	0	29875488	European		NA	Protein	Immune system	NA
prot-a-844	DnaJ homolog subfamily C member 15	3301	10534735	2018	NA	Sun BB	public	1	Males and Females	0	29875488	European		NA	Protein	Immune system	NA
prot-a-845	DnaJ homolog subfamily C member 17	3301	10534735	2018	NA	Sun BB	public	1	Males and Females	0	29875488	European		NA	Protein	Immune system	NA
prot-a-847	Mitochondrial import inner membrane translocase subunit TIM14	3301	10534735	2018	NA	Sun BB	public	1	Males and Females	0	29875488	European		NA	Protein	Immune system	NA
prot-a-849	DnaJ homolog subfamily C member 30	3301	10534735	2018	NA	Sun BB	public	1	Males and Females	0	29875488	European		NA	Protein	Immune system	NA
prot-a-854	Dedicator of cytokinesis protein 9	3301	10534735	2018	NA	Sun BB	public	1	Males and Females	0	29875488	European		NA	Protein	Immune system	NA
prot-a-855	Docking protein 2	3301	10534735	2018	NA	Sun BB	public	1	Males and Females	0	29875488	European		NA	Protein	Immune system	NA
prot-a-857	Dipeptidase 2	3301	10534735	2018	NA	Sun BB	public	1	Males and Females	0	29875488	European		NA	Protein	Immune system	NA
prot-a-859	Dipeptidyl peptidase 2	3301	10534735	2018	NA	Sun BB	public	1	Males and Females	0	29875488	European		NA	Protein	Immune system	NA
prot-a-86	Junctional adhesion molecule-like	3301	10534735	2018	NA	Sun BB	public	1	Males and Females	0	29875488	European		NA	Protein	Immune system	NA
prot-a-861	Dermatopontin	3301	10534735	2018	NA	Sun BB	public	1	Males and Females	0	29875488	European		NA	Protein	Immune system	NA
prot-a-865	Dorsal root ganglia homeobox protein	3301	10534735	2018	NA	Sun BB	public	1	Males and Females	0	29875488	European		NA	Protein	Immune system	NA
prot-a-867	Desmocollin-3	3301	10534735	2018	NA	Sun BB	public	1	Males and Females	0	29875488	European		NA	Protein	Immune system	NA
prot-a-868	Down syndrome cell adhesion molecule	3301	10534735	2018	NA	Sun BB	public	1	Males and Females	0	29875488	European		NA	Protein	Immune system	NA
prot-a-869	Desmoglein-1	3301	10534735	2018	NA	Sun BB	public	1	Males and Females	0	29875488	European		NA	Protein	Immune system	NA
prot-a-87	Amphoterin-induced protein 1	3301	10534735	2018	NA	Sun BB	public	1	Males and Females	0	29875488	European		NA	Protein	Immune system	NA
prot-a-870	Desmoglein-2	3301	10534735	2018	NA	Sun BB	public	1	Males and Females	0	29875488	European		NA	Protein	Immune system	NA
prot-a-872	E3 ubiquitin-protein ligase DTX3L	3301	10534735	2018	NA	Sun BB	public	1	Males and Females	0	29875488	European		NA	Protein	Immune system	NA
prot-a-873	Dual specificity protein phosphatase 13 isoform A	3301	10534735	2018	NA	Sun BB	public	1	Males and Females	0	29875488	European		NA	Protein	Immune system	NA
prot-a-875	Dual specificity protein phosphatase 16	3301	10534735	2018	NA	Sun BB	public	1	Males and Females	0	29875488	European		NA	Protein	Immune system	NA
prot-a-876	Dual specificity protein phosphatase 4	3301	10534735	2018	NA	Sun BB	public	1	Males and Females	0	29875488	European		NA	Protein	Immune system	NA
prot-a-878	Segment polarity protein dishevelled homolog DVL-2	3301	10534735	2018	NA	Sun BB	public	1	Males and Females	0	29875488	European		NA	Protein	Immune system	NA
prot-a-879	Dynactin-associated protein	3301	10534735	2018	NA	Sun BB	public	1	Males and Females	0	29875488	European		NA	Protein	Immune system	NA
prot-a-880	Dynein light chain 1, cytoplasmic	3301	10534735	2018	NA	Sun BB	public	1	Males and Females	0	29875488	European		NA	Protein	Immune system	NA
prot-a-883	Endothelin-converting enzyme 1	3301	10534735	2018	NA	Sun BB	public	1	Males and Females	0	29875488	European		NA	Protein	Immune system	NA
prot-a-884	Endothelin-converting enzyme 1	3301	10534735	2018	NA	Sun BB	public	1	Males and Females	0	29875488	European		NA	Protein	Immune system	NA
prot-a-885	Ectodysplasin-A, secreted form	3301	10534735	2018	NA	Sun BB	public	1	Males and Females	0	29875488	European		NA	Protein	Immune system	NA
prot-a-887	Tumor necrosis factor receptor superfamily member 27	3301	10534735	2018	NA	Sun BB	public	1	Males and Females	0	29875488	European		NA	Protein	Immune system	NA
prot-a-888	Tumor necrosis factor receptor superfamily member EDAR	3301	10534735	2018	NA	Sun BB	public	1	Males and Females	0	29875488	European		NA	Protein	Immune system	NA
prot-a-89	Alpha-amylase 1	3301	10534735	2018	NA	Sun BB	public	1	Males and Females	0	29875488	European		NA	Protein	Immune system	NA
prot-a-891	Endothelial differentiation-related factor 1	3301	10534735	2018	NA	Sun BB	public	1	Males and Females	0	29875488	European		NA	Protein	Immune system	NA
prot-a-892	Endothelin-2	3301	10534735	2018	NA	Sun BB	public	1	Males and Females	0	29875488	European		NA	Protein	Immune system	NA
prot-a-893	Early endosome antigen 1	3301	10534735	2018	NA	Sun BB	public	1	Males and Females	0	29875488	European		NA	Protein	Immune system	NA
prot-a-897	Ephrin-A2	3301	10534735	2018	NA	Sun BB	public	1	Males and Females	0	29875488	European		NA	Protein	Immune system	NA
prot-a-900	Ephrin-A4	3301	10534735	2018	NA	Sun BB	public	1	Males and Females	0	29875488	European		NA	Protein	Immune system	NA
prot-a-901	Ephrin-A5	3301	10534735	2018	NA	Sun BB	public	1	Males and Females	0	29875488	European		NA	Protein	Immune system	NA
prot-a-903	Ephrin-B1	3301	10534735	2018	NA	Sun BB	public	1	Males and Females	0	29875488	European		NA	Protein	Immune system	NA
prot-a-906	Ephrin-B3	3301	10534735	2018	NA	Sun BB	public	1	Males and Females	0	29875488	European		NA	Protein	Immune system	NA
prot-a-907	Ephrin-B3	3301	10534735	2018	NA	Sun BB	public	1	Males and Females	0	29875488	European		NA	Protein	Immune system	NA
prot-a-908	Epidermal growth factor	3301	10534735	2018	NA	Sun BB	public	1	Males and Females	0	29875488	European		NA	Protein	Immune system	NA
prot-a-91	Anaphase-promoting complex subunit 7	3301	10534735	2018	NA	Sun BB	public	1	Males and Females	0	29875488	European		NA	Protein	Immune system	NA
prot-a-911	EH domain-binding protein 1	3301	10534735	2018	NA	Sun BB	public	1	Males and Females	0	29875488	European		NA	Protein	Immune system	NA
prot-a-914	Histone-lysine N-methyltransferase EHMT2	3301	10534735	2018	NA	Sun BB	public	1	Males and Females	0	29875488	European		NA	Protein	Immune system	NA
prot-a-915	EP300-interacting inhibitor of differentiation 3	3301	10534735	2018	NA	Sun BB	public	1	Males and Females	0	29875488	European		NA	Protein	Immune system	NA
prot-a-916	Probable RNA-binding protein EIF1AD	3301	10534735	2018	NA	Sun BB	public	1	Males and Females	0	29875488	European		NA	Protein	Immune system	NA
prot-a-917	Eukaryotic translation initiation factor 1A, X-chromosomal	3301	10534735	2018	NA	Sun BB	public	1	Males and Females	0	29875488	European		NA	Protein	Immune system	NA
prot-a-918	Translation initiation factor eIF-2B subunit alpha	3301	10534735	2018	NA	Sun BB	public	1	Males and Females	0	29875488	European		NA	Protein	Immune system	NA
prot-a-919	Eukaryotic translation initiation factor 3 subunit G	3301	10534735	2018	NA	Sun BB	public	1	Males and Females	0	29875488	European		NA	Protein	Immune system	NA
prot-a-920	Eukaryotic translation initiation factor 3 subunit J	3301	10534735	2018	NA	Sun BB	public	1	Males and Females	0	29875488	European		NA	Protein	Immune system	NA
prot-a-921	Eukaryotic initiation factor 4A-III	3301	10534735	2018	NA	Sun BB	public	1	Males and Females	0	29875488	European		NA	Protein	Immune system	NA
prot-a-922	Eukaryotic translation initiation factor 4B	3301	10534735	2018	NA	Sun BB	public	1	Males and Females	0	29875488	European		NA	Protein	Immune system	NA
prot-a-923	Eukaryotic translation initiation factor 4E type 2	3301	10534735	2018	NA	Sun BB	public	1	Males and Females	0	29875488	European		NA	Protein	Immune system	NA
prot-a-925	Eukaryotic translation initiation factor 4 gamma 3	3301	10534735	2018	NA	Sun BB	public	1	Males and Females	0	29875488	European		NA	Protein	Immune system	NA
prot-a-927	Eukaryotic translation initiation factor 5A-1	3301	10534735	2018	NA	Sun BB	public	1	Males and Females	0	29875488	European		NA	Protein	Immune system	NA
prot-a-928	ELAV-like protein 1	3301	10534735	2018	NA	Sun BB	public	1	Males and Females	0	29875488	European		NA	Protein	Immune system	NA
prot-a-930	ETS domain-containing protein Elk-1	3301	10534735	2018	NA	Sun BB	public	1	Males and Females	0	29875488	European		NA	Protein	Immune system	NA
prot-a-931	ETS domain-containing protein Elk-3	3301	10534735	2018	NA	Sun BB	public	1	Males and Females	0	29875488	European		NA	Protein	Immune system	NA
prot-a-932	RNA polymerase II elongation factor ELL	3301	10534735	2018	NA	Sun BB	public	1	Males and Females	0	29875488	European		NA	Protein	Immune system	NA
prot-a-935	ER membrane protein complex subunit 1	3301	10534735	2018	NA	Sun BB	public	1	Males and Females	0	29875488	European		NA	Protein	Immune system	NA
prot-a-936	ER membrane protein complex subunit 4	3301	10534735	2018	NA	Sun BB	public	1	Males and Females	0	29875488	European		NA	Protein	Immune system	NA
prot-a-937	EMI domain-containing protein 1	3301	10534735	2018	NA	Sun BB	public	1	Males and Females	0	29875488	European		NA	Protein	Immune system	NA
prot-a-939	EMILIN-3	3301	10534735	2018	NA	Sun BB	public	1	Males and Females	0	29875488	European		NA	Protein	Immune system	NA
prot-a-940	EMILIN-3	3301	10534735	2018	NA	Sun BB	public	1	Males and Females	0	29875488	European		NA	Protein	Immune system	NA
prot-a-943	Endoglin	3301	10534735	2018	NA	Sun BB	public	1	Males and Females	0	29875488	European		NA	Protein	Immune system	NA
prot-a-944	Gamma-enolase	3301	10534735	2018	NA	Sun BB	public	1	Males and Females	0	29875488	European		NA	Protein	Immune system	NA
prot-a-945	Gamma-enolase	3301	10534735	2018	NA	Sun BB	public	1	Males and Females	0	29875488	European		NA	Protein	Immune system	NA
prot-a-947	Ectonucleotide pyrophosphatase/phosphodiesterase family member 5	3301	10534735	2018	NA	Sun BB	public	1	Males and Females	0	29875488	European		NA	Protein	Immune system	NA
prot-a-948	Ectonucleotide pyrophosphatase/phosphodiesterase family member 7	3301	10534735	2018	NA	Sun BB	public	1	Males and Females	0	29875488	European		NA	Protein	Immune system	NA
prot-a-949	AP-4 complex accessory subunit tepsin	3301	10534735	2018	NA	Sun BB	public	1	Males and Females	0	29875488	European		NA	Protein	Immune system	NA
prot-a-950	Ectonucleoside triphosphate diphosphohydrolase 1	3301	10534735	2018	NA	Sun BB	public	1	Males and Females	0	29875488	European		NA	Protein	Immune system	NA
prot-a-951	Ectonucleoside triphosphate diphosphohydrolase 1	3301	10534735	2018	NA	Sun BB	public	1	Males and Females	0	29875488	European		NA	Protein	Immune system	NA
prot-a-952	Ectonucleoside triphosphate diphosphohydrolase 3	3301	10534735	2018	NA	Sun BB	public	1	Males and Females	0	29875488	European		NA	Protein	Immune system	NA
prot-a-953	Ectonucleoside triphosphate diphosphohydrolase 5	3301	10534735	2018	NA	Sun BB	public	1	Males and Females	0	29875488	European		NA	Protein	Immune system	NA
prot-a-956	Ephrin type-A receptor 1	3301	10534735	2018	NA	Sun BB	public	1	Males and Females	0	29875488	European		NA	Protein	Immune system	NA
prot-a-957	Ephrin type-A receptor 2	3301	10534735	2018	NA	Sun BB	public	1	Males and Females	0	29875488	European		NA	Protein	Immune system	NA
prot-a-958	Ephrin type-A receptor 5	3301	10534735	2018	NA	Sun BB	public	1	Males and Females	0	29875488	European		NA	Protein	Immune system	NA
prot-a-96	Angiopoietin-related protein 1	3301	10534735	2018	NA	Sun BB	public	1	Males and Females	0	29875488	European		NA	Protein	Immune system	NA
prot-a-960	Ephrin type-B receptor 2	3301	10534735	2018	NA	Sun BB	public	1	Males and Females	0	29875488	European		NA	Protein	Immune system	NA
prot-a-961	Ephrin type-B receptor 2	3301	10534735	2018	NA	Sun BB	public	1	Males and Females	0	29875488	European		NA	Protein	Immune system	NA
prot-a-962	Ephrin type-B receptor 2	3301	10534735	2018	NA	Sun BB	public	1	Males and Females	0	29875488	European		NA	Protein	Immune system	NA
prot-a-965	Ephrin type-B receptor 6	3301	10534735	2018	NA	Sun BB	public	1	Males and Females	0	29875488	European		NA	Protein	Immune system	NA
prot-a-967	Erythropoietin	3301	10534735	2018	NA	Sun BB	public	1	Males and Females	0	29875488	European		NA	Protein	Immune system	NA
prot-a-970	Epiphycan	3301	10534735	2018	NA	Sun BB	public	1	Males and Females	0	29875488	European		NA	Protein	Immune system	NA
prot-a-971	Endoplasmic reticulum aminopeptidase 1	3301	10534735	2018	NA	Sun BB	public	1	Males and Females	0	29875488	European		NA	Protein	Immune system	NA
prot-a-972	Endoplasmic reticulum aminopeptidase 2	3301	10534735	2018	NA	Sun BB	public	1	Males and Females	0	29875488	European		NA	Protein	Immune system	NA
prot-a-974	Receptor tyrosine-protein kinase erbB-3	3301	10534735	2018	NA	Sun BB	public	1	Males and Females	0	29875488	European		NA	Protein	Immune system	NA
prot-a-977	Epiregulin	3301	10534735	2018	NA	Sun BB	public	1	Males and Females	0	29875488	European		NA	Protein	Immune system	NA
prot-a-978	Enhancer of rudimentary homolog	3301	10534735	2018	NA	Sun BB	public	1	Males and Females	0	29875488	European		NA	Protein	Immune system	NA
prot-a-979	Endoplasmic reticulum lectin 1	3301	10534735	2018	NA	Sun BB	public	1	Males and Females	0	29875488	European		NA	Protein	Immune system	NA
prot-a-980	Erlin-1	3301	10534735	2018	NA	Sun BB	public	1	Males and Females	0	29875488	European		NA	Protein	Immune system	NA
prot-a-981	Erythroid membrane-associated protein	3301	10534735	2018	NA	Sun BB	public	1	Males and Females	0	29875488	European		NA	Protein	Immune system	NA
prot-a-982	ERO1-like protein alpha	3301	10534735	2018	NA	Sun BB	public	1	Males and Females	0	29875488	European		NA	Protein	Immune system	NA
prot-a-983	ERO1-like protein beta	3301	10534735	2018	NA	Sun BB	public	1	Males and Females	0	29875488	European		NA	Protein	Immune system	NA
prot-a-986	Endogenous retrovirus group V member 1 Env polyprotein	3301	10534735	2018	NA	Sun BB	public	1	Males and Females	0	29875488	European		NA	Protein	Immune system	NA
prot-a-987	Endothelial cell-selective adhesion molecule	3301	10534735	2018	NA	Sun BB	public	1	Males and Females	0	29875488	European		NA	Protein	Immune system	NA
prot-a-988	Endothelial cell-selective adhesion molecule	3301	10534735	2018	NA	Sun BB	public	1	Males and Females	0	29875488	European		NA	Protein	Immune system	NA
prot-a-989	S-formylglutathione hydrolase	3301	10534735	2018	NA	Sun BB	public	1	Males and Females	0	29875488	European		NA	Protein	Immune system	NA
prot-a-99	Angiopoietin-related protein 4	3301	10534735	2018	NA	Sun BB	public	1	Males and Females	0	29875488	European		NA	Protein	Immune system	NA
prot-a-990	Endothelial cell-specific molecule 1	3301	10534735	2018	NA	Sun BB	public	1	Males and Females	0	29875488	European		NA	Protein	Immune system	NA
prot-a-992	Persulfide dioxygenase ETHE1, mitochondrial	3301	10534735	2018	NA	Sun BB	public	1	Males and Females	0	29875488	European		NA	Protein	Immune system	NA
prot-a-994	Protein C-ets-2	3301	10534735	2018	NA	Sun BB	public	1	Males and Females	0	29875488	European		NA	Protein	Immune system	NA
[truncated: 439 more rows]

## Sheet: TableS3_allSigResults
Table S3. All MR results achieving at least nominal significance (p<0.05), with diseases/traits and blood proteins as exposure and ACE2 lung expression as outcome.
id	trait	nsnps	b_IVW	se_IVW	pval_IVW	b_Egger	se_Egger	pval_Egger	b_Wald	se_Wald	pval_Wald	Egger_intercept	pval_intercept	type
ukb-b-15272	Ever manic/hyper for 2 days	2	20.6933	6.45418	0.0013451	-	-	-	-	-	-	-	-	IEU_UKBB
ukb-b-18194	Non-cancer illness code, self-reported: ankylosing spondylitis	3	26.9764	11.1679	0.0157128	15.8374	335.491	0.96997	-	-	-	0.0301634	0.978859	IEU_UKBB
ukb-b-5115	Diagnoses - secondary ICD10: Z72.0 Tobacco use	3	32.3535	13.4215	0.0159272	23.4632	86.054	0.830541	-	-	-	0.0204659	0.93304	IEU_UKBB
ukb-b-10753	Diabetes diagnosed by doctor	58	3.71396	1.56957	0.0179706	-0.36924	3.4297	0.914651	-	-	-	0.0213035	0.186765	IEU_UKBB
ukb-b-6514	Non-cancer illness code, self-reported: hiatus hernia	2	38.8008	17.1826	0.0239362	-	-	-	-	-	-	-	-	IEU_UKBB
ukb-b-8388	Started insulin within one year diagnosis of diabetes	7	0.730271	0.332584	0.0281101	0.72733	0.658787	0.319852	-	-	-	0.000203441	0.996073	IEU_UKBB
ukb-b-12948	Non-cancer illness code, self-reported: diabetes	49	4.21336	2.02112	0.0370995	5.02431	4.63196	0.283585	-	-	-	-0.00352659	0.846197	IEU_UKBB
ukb-b-17219	Diagnoses - secondary ICD10: J45.9 Asthma, unspecified	19	6.5329	3.17286	0.0394946	20.4549	10.7991	0.0753512	-	-	-	-0.0570278	0.195124	IEU_UKBB
ukb-b-10694	Diagnoses - secondary ICD10: E10.9 Without complications	3	21.7782	10.6278	0.0404459	29.953	25.1897	0.445144	-	-	-	-0.0247563	0.781169	IEU_UKBB
ukb-b-1386	Diagnoses - main ICD10: K21.9 Gastro-oesophageal reflux disease without oesophagitis	1	-	-	-	-	-	-	-80.5067	39.2075	0.0400388	-	-	IEU_UKBB
ukb-b-8848	Diagnoses - main ICD10: K44.9 Diaphragmatic hernia without obstruction or gangrene	1	-	-	-	-	-	-	61.7911	27.3913	0.0240793	-	-	IEU_UKBB
ukb-b-8549	Diagnoses - main ICD10: D24 Benign neoplasm of breast	1	-	-	-	-	-	-	142.714	62.4738	0.0223486	-	-	IEU_UKBB
ukb-d-30620_raw	Alanine aminotransferase	91	0.0473918	0.0176869	0.00737336	0.0805578	0.0389026	0.041278	-	-	-	-0.0124392	0.341067	Neale_UKBB
ukb-d-D12	Diagnoses - main ICD10: D12 Benign neoplasm of colon, rectum, anus and anal canal	12	-12.1219	4.89724	0.013314	-5.75773	18.6672	0.764077	-	-	-	-0.0209336	0.731194	Neale_UKBB
ukb-d-30070_irnt	Red blood cell (erythrocyte) distribution width	225	0.24282	0.104706	0.0203911	0.348699	0.188522	0.0656876	-	-	-	-0.00442604	0.500139	Neale_UKBB
ukb-d-I9_DISVEINLYMPH	Diseases of veins, lymphatic vessels and lymph nodes, not elsewhere classified	14	-8.11003	3.61236	0.0247631	-4.05701	8.15735	0.627934	-	-	-	-0.0172222	0.589652	Neale_UKBB
ukb-d-30220_irnt	Basophill percentage	77	-0.503647	0.228142	0.0272718	-0.583697	0.420024	0.168739	-	-	-	0.00258986	0.821053	Neale_UKBB
ukb-d-22615_2	Workplace had a lot of diesel exhaust: Often	2	12.6716	5.75985	0.0278076	-	-	-	-	-	-	-	-	Neale_UKBB
ukb-d-C_RESPIRATORY_INTRATHORACIC	Cancer of respiratory intrathoracic	3	82.0758	39.6778	0.0385879	63.4095	110.791	0.669066	-	-	-	0.0335098	0.877898	Neale_UKBB
ukb-d-C3_RESPIRATORY_INTRATHORACIC	Malignant neoplasm of respiratory system and intrathoracic organs	3	82.0758	39.6778	0.0385879	63.4095	110.791	0.669066	-	-	-	0.0335098	0.877898	Neale_UKBB
ukb-d-30780_raw	LDL direct	126	-0.271751	0.167635	0.104999	-0.757718	0.266685	0.00525521	-	-	-	0.0195286	0.0207213	Neale_UKBB
ukb-d-30830_raw	SHBG	163	0.0043636	0.00568578	0.442808	0.0215729	0.0105451	0.0424058	-	-	-	-0.0163974	0.0552112	Neale_UKBB
ukb-d-30680_raw	Calcium	152	0.201983	1.88448	0.914644	-10.3839	4.00737	0.0105081	-	-	-	0.0308042	0.00344244	Neale_UKBB
ukb-d-C34	Diagnoses - main ICD10: C34 Malignant neoplasm of bronchus and lung	1	-	-	-	-	-	-	104.073	47.6642	0.0290019	-	-	Neale_UKBB
ukb-d-M48	Diagnoses - main ICD10: M48 Other spondylopathies	1	-	-	-	-	-	-	121.699	50.6742	0.0163239	-	-	Neale_UKBB
ukb-d-N13	Diagnoses - main ICD10: N13 Obstructive and reflux uropathy	1	-	-	-	-	-	-	148.794	75.3619	0.0483368	-	-	Neale_UKBB
ieu-a-1134	ER+ Breast cancer (GWAS)	7	0.175854	0.0754609	0.0197852	0.538867	0.295275	0.127591	-	-	-	-0.094362	0.25944	Priority1_Disease
ieu-a-1013	Glioma	3	0.200028	0.095755	0.0367114	0.437861	0.736997	0.65872	-	-	-	-0.0704592	0.799686	Priority1_Disease
ieu-a-23	Type 2 diabetes	25	0.210267	0.103432	0.0420626	0.159974	0.403835	0.695655	-	-	-	0.00530824	0.898608	Priority1_Disease
ieu-a-32	Ulcerative colitis	29	0.0256345	0.0596059	0.667147	0.585521	0.177456	0.00272387	-	-	-	-0.104897	0.00266601	Priority1_Disease
ieu-a-31	Inflammatory bowel disease	49	-0.0137523	0.0498546	0.782665	0.286596	0.13274	0.0359812	-	-	-	-0.0509689	0.0191244	Priority1_Disease
ieu-a-30	Crohn's disease	41	0.0105601	0.0389775	0.786447	0.196136	0.0895655	0.034581	-	-	-	-0.0442621	0.0268041	Priority1_Disease
ieu-a-292	Inflammatory bowel disease	107	0.0033557	0.0428814	0.937625	0.245764	0.10337	0.019239	-	-	-	-0.0308646	0.0113461	Priority1_Disease
ieu-a-793	Urate	4	0.0256042	0.0115836	0.0270785	0.02632	0.012367	0.167117	-	-	-	-0.00787048	0.883932	Priority1_RiskFactor
ieu-a-1034	Height	4	0.636216	0.320155	0.0468987	2.06013	7.38371	0.806441	-	-	-	-0.117651	0.864763	Priority1_RiskFactor
ieu-a-299	HDL cholesterol	84	0.0841716	0.129121	0.514476	0.563048	0.2402	0.0214941	-	-	-	-0.0257509	0.0204277	Priority1_RiskFactor
ieu-a-1089	Body mass index	1	-	-	-	-	-	-	3.62618	1.23693	0.00337217	-	-	Priority1_RiskFactor
prot-a-1346	HLA class II histocompatibility antigen, DP beta 1 chain	2	0.729321	0.194663	0.000179256	-	-	-	-	-	-	-	-	Protein
prot-a-780	Deformed epidermal autoregulatory factor 1 homolog	2	0.587854	0.179749	0.00107386	-	-	-	-	-	-	-	-	Protein
prot-a-61	Alpha-2-HS-glycoprotein	2	0.251189	0.0790566	0.00148639	-	-	-	-	-	-	-	-	Protein
prot-a-1398	Intercellular adhesion molecule 2	2	0.537274	0.200561	0.00738734	-	-	-	-	-	-	-	-	Protein
prot-a-1369	Haptoglobin	5	0.148319	0.0558883	0.00795808	0.100909	0.135266	0.509801	-	-	-	0.030633	0.725991	Protein
prot-a-2018	Kinetochore protein NDC80 homolog	2	0.598679	0.230684	0.00945252	-	-	-	-	-	-	-	-	Protein
prot-a-3242	DNA repair protein XRCC4	2	0.331348	0.134486	0.0137471	-	-	-	-	-	-	-	-	Protein
prot-a-3254	Tyrosine-protein kinase ZAP-70	3	0.395178	0.161036	0.0141292	0.629288	0.300866	0.283919	-	-	-	-0.0595812	0.526103	Protein
prot-a-1607	Histone acetyltransferase KAT6A	2	0.449936	0.183571	0.0142451	-	-	-	-	-	-	-	-	Protein
prot-a-2399	PH and SEC7 domain-containing protein 2	3	-0.202903	0.0834388	0.0150258	-0.328226	0.210626	0.363208	-	-	-	0.0484016	0.633956	Protein
prot-a-3262	Zinc finger protein 175	2	-0.264956	0.110362	0.01636	-	-	-	-	-	-	-	-	Protein
prot-a-612	Cytochrome c oxidase assembly factor 3 homolog, mitochondrial	3	0.406947	0.171014	0.0173311	0.779911	0.370156	0.282107	-	-	-	-0.0816331	0.45949	Protein
prot-a-493	Cyclin-dependent kinase 5:Cyclin-dependent kinase 5 activator 1 complex	2	0.423252	0.178085	0.0174686	-	-	-	-	-	-	-	-	Protein
prot-a-376	Chromobox protein homolog 5	2	0.460686	0.193948	0.0175342	-	-	-	-	-	-	-	-	Protein
prot-a-3086	Tropomyosin beta chain	2	0.449067	0.189126	0.0175758	-	-	-	-	-	-	-	-	Protein
prot-a-869	Desmoglein-1	2	0.435759	0.183771	0.0177302	-	-	-	-	-	-	-	-	Protein
prot-a-280	Uncharacterized protein C10orf35	2	0.42692	0.180867	0.0182549	-	-	-	-	-	-	-	-	Protein
prot-a-1524	Interleukin-34	2	0.426927	0.181077	0.0183878	-	-	-	-	-	-	-	-	Protein
prot-a-2271	Phosphatidylinositol 4,5-bisphosphate 3-kinase catalytic subunit gamma isoform	2	0.427413	0.182234	0.0190061	-	-	-	-	-	-	-	-	Protein
prot-a-331	Carbonic anhydrase 4	2	0.438221	0.187888	0.0196821	-	-	-	-	-	-	-	-	Protein
prot-a-238	Bcl-2-like protein 1	2	0.443424	0.190214	0.0197435	-	-	-	-	-	-	-	-	Protein
prot-a-322	Complement component C8	2	0.465745	0.200019	0.0198853	-	-	-	-	-	-	-	-	Protein
prot-a-28	Disintegrin and metalloproteinase domain-containing protein 23	5	0.194146	0.0850664	0.0224721	-0.253768	0.568352	0.6855	-	-	-	0.183089	0.483663	Protein
prot-a-952	Ectonucleoside triphosphate diphosphohydrolase 3	2	0.486476	0.217052	0.0250075	-	-	-	-	-	-	-	-	Protein
prot-a-173	Arylsulfatase K	2	0.361084	0.161161	0.0250577	-	-	-	-	-	-	-	-	Protein
prot-a-2438	Tyrosine-protein phosphatase non-receptor type 1	2	0.400944	0.180334	0.0261928	-	-	-	-	-	-	-	-	Protein
prot-a-2245	Platelet endothelial cell adhesion molecule	3	0.376599	0.169753	0.0265199	1.05261	0.507256	0.285884	-	-	-	-0.148515	0.391854	Protein
prot-a-3088	Thyroid peroxidase	2	0.533839	0.242687	0.0278283	-	-	-	-	-	-	-	-	Protein
prot-a-10	Histo-blood group ABO system transferase	2	-0.164231	0.0755622	0.0297462	-	-	-	-	-	-	-	-	Protein
prot-a-372	Cerebellin-4	2	0.441886	0.203763	0.0301106	-	-	-	-	-	-	-	-	Protein
prot-a-471	CD97 antigen	2	0.435839	0.201341	0.0304124	-	-	-	-	-	-	-	-	Protein
prot-a-1800	Leucine-rich repeat and transmembrane domain-containing protein 2	2	0.413589	0.192229	0.0314339	-	-	-	-	-	-	-	-	Protein
prot-a-2810	SPARC-like protein 1	2	0.481931	0.228504	0.0349389	-	-	-	-	-	-	-	-	Protein
prot-a-19	Lysosomal acid phosphatase	3	-0.214694	0.102135	0.0355483	-0.320554	0.177431	0.321835	-	-	-	0.0546149	0.598713	Protein
prot-a-402	C-C motif chemokine 25	3	-0.204991	0.0992582	0.0389014	-0.220525	0.240771	0.527924	-	-	-	0.00499861	0.954993	Protein
prot-a-3231	WNT1-inducible-signaling pathway protein 1	2	-0.15906	0.0770451	0.0389695	-	-	-	-	-	-	-	-	Protein
prot-a-1126	Receptor-type tyrosine-protein kinase FLT3	3	0.347583	0.168807	0.0394882	0.839821	0.382053	0.271798	-	-	-	-0.10602	0.388353	Protein
prot-a-1148	Ferritin	3	0.203302	0.0990567	0.0401328	0.274474	0.267795	0.492159	-	-	-	-0.0249789	0.810427	Protein
prot-a-334	Carbonic anhydrase 9	3	-0.364873	0.177854	0.0402149	0.305887	0.630656	0.712502	-	-	-	-0.130189	0.467244	Protein
prot-a-1622	Vascular endothelial growth factor receptor 2	4	0.140824	0.0689303	0.0410534	0.157965	0.133351	0.357876	-	-	-	-0.00905531	0.894179	Protein
prot-a-2829	Spondin-1	2	0.227714	0.111994	0.0420253	-	-	-	-	-	-	-	-	Protein
prot-a-467	T-cell surface glycoprotein CD8 beta chain	2	0.526115	0.259025	0.0422408	-	-	-	-	-	-	-	-	Protein
prot-a-266	Bactericidal permeability-increasing protein	2	-0.188063	0.0930718	0.0433183	-	-	-	-	-	-	-	-	Protein
prot-a-1807	Tumor necrosis factor receptor superfamily member 3	2	0.413764	0.206558	0.0451625	-	-	-	-	-	-	-	-	Protein
prot-a-2980	Metalloproteinase inhibitor 4	2	-0.249447	0.124635	0.0453471	-	-	-	-	-	-	-	-	Protein
prot-a-2155	Oncostatin-M	2	0.430445	0.216284	0.0465704	-	-	-	-	-	-	-	-	Protein
prot-a-2485	DNA repair protein RAD51 homolog 1	2	0.442073	0.224656	0.0490935	-	-	-	-	-	-	-	-	Protein
prot-a-1631	UPF0577 protein KIAA1324	1	-	-	-	-	-	-	-1.17175	0.329891	0.000382415	-	-	Protein
prot-a-1459	IgLON family member 5	1	-	-	-	-	-	-	-1.11365	0.43194	0.00993035	-	-	Protein
prot-a-1868	Induced myeloid leukemia cell differentiation protein Mcl-1	1	-	-	-	-	-	-	-1.05495	0.353015	0.00280446	-	-	Protein
prot-a-1507	Interleukin-22	1	-	-	-	-	-	-	-0.852295	0.341926	0.01268	-	-	Protein
prot-a-829	Protein delta homolog 2	1	-	-	-	-	-	-	-0.735687	0.342571	0.0317498	-	-	Protein
prot-a-2617	Protein S100-A2	1	-	-	-	-	-	-	-0.734124	0.341843	0.0317498	-	-	Protein
prot-a-2633	Suprabasin	1	-	-	-	-	-	-	-0.71597	0.321584	0.0259881	-	-	Protein
prot-a-2180	Protein deglycase DJ-1	1	-	-	-	-	-	-	-0.693103	0.335016	0.0385588	-	-	Protein
prot-a-3156	UDP-glucuronosyltransferase 1-6	1	-	-	-	-	-	-	-0.685651	0.307965	0.0259881	-	-	Protein
prot-a-1163	Gamma-aminobutyric acid type B receptor subunit 2	1	-	-	-	-	-	-	-0.661678	0.31358	0.0348517	-	-	Protein
prot-a-2893	Bile salt sulfotransferase	1	-	-	-	-	-	-	-0.641562	0.305029	0.0354413	-	-	Protein
prot-a-1833	Mannosyl-oligosaccharide 1,2-alpha-mannosidase IB	1	-	-	-	-	-	-	-0.638653	0.272525	0.0191054	-	-	Protein
prot-a-2310	Melanocyte protein PMEL	1	-	-	-	-	-	-	-0.633113	0.306601	0.0389285	-	-	Protein
prot-a-1340	Homeodomain-interacting protein kinase 3	1	-	-	-	-	-	-	-0.615189	0.285443	0.0311456	-	-	Protein
prot-a-740	Stromal cell-derived factor 1	1	-	-	-	-	-	-	-0.611465	0.301356	0.0424539	-	-	Protein
prot-a-818	Diablo homolog, mitochondrial	1	-	-	-	-	-	-	-0.597322	0.277094	0.0311098	-	-	Protein
prot-a-741	Stromal cell-derived factor 1	1	-	-	-	-	-	-	-0.59317	0.29234	0.0424539	-	-	Protein
prot-a-1248	Glypican-6	1	-	-	-	-	-	-	-0.580955	0.260941	0.0259881	-	-	Protein
prot-a-1596	Protein jagged-1	1	-	-	-	-	-	-	-0.54629	0.210191	0.00934901	-	-	Protein
prot-a-3232	WNT1-inducible-signaling pathway protein 3	1	-	-	-	-	-	-	-0.484714	0.217713	0.0259881	-	-	Protein
prot-a-2418	26S proteasome non-ATPase regulatory subunit 5	1	-	-	-	-	-	-	-0.39177	0.194233	0.0436941	-	-	Protein
prot-a-1628	Uncharacterized family 31 glucosidase KIAA1161	1	-	-	-	-	-	-	-0.376927	0.158884	0.0176757	-	-	Protein
prot-a-2556	Ribonuclease 4	1	-	-	-	-	-	-	-0.356433	0.114628	0.00187421	-	-	Protein
prot-a-1451	Insulin-like growth factor-binding protein 7	1	-	-	-	-	-	-	-0.304434	0.149533	0.0417612	-	-	Protein
prot-a-2862	Stabilin-1	1	-	-	-	-	-	-	-0.300165	0.129251	0.0202146	-	-	Protein
prot-a-268	BPI fold-containing family B member 1	1	-	-	-	-	-	-	-0.233125	0.1065	0.0285985	-	-	Protein
prot-a-1207	Gamma-glutamyl hydrolase	1	-	-	-	-	-	-	-0.229456	0.10641	0.031057	-	-	Protein
prot-a-3191	Valine--tRNA ligase	1	-	-	-	-	-	-	0.137345	0.0576661	0.0172314	-	-	Protein
prot-a-1216	D-glucuronyl C5-epimerase	1	-	-	-	-	-	-	0.153729	0.0615661	0.0125258	-	-	Protein
prot-a-661	Cysteine-rich secretory protein 2	1	-	-	-	-	-	-	0.169321	0.0756741	0.0252532	-	-	Protein
prot-a-3179	Ubiquitin carboxyl-terminal hydrolase 21	1	-	-	-	-	-	-	0.209982	0.09356	0.0248097	-	-	Protein
prot-a-1876	Mediator of RNA polymerase II transcription subunit 4	1	-	-	-	-	-	-	0.247845	0.110431	0.0248097	-	-	Protein
prot-a-524	Cofilin-1	1	-	-	-	-	-	-	0.298455	0.132981	0.0248097	-	-	Protein
prot-a-65	Endothelial monocyte-activating polypeptide 2	1	-	-	-	-	-	-	0.312663	0.139311	0.0248097	-	-	Protein
prot-a-1793	Leucine-rich repeat neuronal protein 1	1	-	-	-	-	-	-	0.362675	0.184474	0.049299	-	-	Protein
prot-a-1828	Melanoma-associated antigen 3	1	-	-	-	-	-	-	0.374631	0.166922	0.0248097	-	-	Protein
prot-a-1133	Fibronectin type III domain-containing protein 5	1	-	-	-	-	-	-	0.417697	0.207582	0.044198	-	-	Protein
prot-a-2307	Plexin-A1	1	-	-	-	-	-	-	0.42303	0.204548	0.0386286	-	-	Protein
prot-a-1758	Lamin-B1	1	-	-	-	-	-	-	0.429856	0.205435	0.0364009	-	-	Protein
prot-a-617	Endostatin	1	-	-	-	-	-	-	0.434303	0.195753	0.0265118	-	-	Protein
prot-a-1478	Interleukin-15 receptor subunit alpha	1	-	-	-	-	-	-	0.439789	0.176081	0.0125018	-	-	Protein
prot-a-3014	Transmembrane protein 59-like	1	-	-	-	-	-	-	0.48379	0.215559	0.0248097	-	-	Protein
prot-a-306	Complement C1q and tumor necrosis factor-related protein 9A	1	-	-	-	-	-	-	0.512677	0.211636	0.0154163	-	-	Protein
prot-a-1343	Hexokinase-1	1	-	-	-	-	-	-	0.516357	0.213155	0.0154163	-	-	Protein
prot-a-1865	Mast cell-expressed membrane protein 1	1	-	-	-	-	-	-	0.526963	0.217533	0.0154163	-	-	Protein
prot-a-1134	Glutamate carboxypeptidase 2	1	-	-	-	-	-	-	0.539506	0.222711	0.0154163	-	-	Protein
prot-a-146	Arfaptin-2	1	-	-	-	-	-	-	0.559962	0.251511	0.0259881	-	-	Protein
prot-a-2863	Stabilin-2	1	-	-	-	-	-	-	0.562047	0.232016	0.0154163	-	-	Protein
prot-a-2853	Alpha-N-acetylgalactosaminide alpha-2,6-sialyltransferase 2	1	-	-	-	-	-	-	0.568223	0.234565	0.0154163	-	-	Protein
prot-a-637	Cytochrome c oxidase subunit 4 isoform 2, mitochondrial	1	-	-	-	-	-	-	0.570181	0.235374	0.0154163	-	-	Protein
prot-a-950	Ectonucleoside triphosphate diphosphohydrolase 1	1	-	-	-	-	-	-	0.584687	0.241362	0.0154163	-	-	Protein
prot-a-123	Amyloid-like protein 2	1	-	-	-	-	-	-	0.611573	0.297993	0.04014	-	-	Protein
prot-a-2949	Testis-expressed sequence 29 protein	1	-	-	-	-	-	-	0.616607	0.254539	0.0154163	-	-	Protein
prot-a-650	Cellular retinoic acid-binding protein 1	1	-	-	-	-	-	-	0.622055	0.256787	0.0154163	-	-	Protein
prot-a-1635	Kinesin-like protein KIF16B	1	-	-	-	-	-	-	0.623931	0.257562	0.0154163	-	-	Protein
prot-a-327	Carbonic anhydrase-related protein 10	1	-	-	-	-	-	-	0.640103	0.264238	0.0154163	-	-	Protein
prot-a-3173	Uroplakin-3b-like protein	1	-	-	-	-	-	-	0.641592	0.264853	0.0154163	-	-	Protein
prot-a-1529	Interleukin-37	1	-	-	-	-	-	-	0.641841	0.264955	0.0154163	-	-	Protein
prot-a-2503	RNA-binding protein 24	1	-	-	-	-	-	-	0.642588	0.265264	0.0154163	-	-	Protein
prot-a-2909	Heterogeneous nuclear ribonucleoprotein Q	1	-	-	-	-	-	-	0.647238	0.267184	0.0154163	-	-	Protein
prot-a-1443	Insulin-like growth factor I	1	-	-	-	-	-	-	0.648888	0.267865	0.0154163	-	-	Protein
prot-a-1141	Secreted frizzled-related protein 3	1	-	-	-	-	-	-	0.661073	0.272894	0.0154163	-	-	Protein
prot-a-3063	Tumor necrosis factor ligand superfamily member 8	1	-	-	-	-	-	-	0.661337	0.273003	0.0154163	-	-	Protein
prot-a-129	Apolipoprotein D	1	-	-	-	-	-	-	0.671128	0.277045	0.0154163	-	-	Protein
prot-a-417	Cell cycle progression protein 1	1	-	-	-	-	-	-	0.676616	0.279311	0.0154163	-	-	Protein
prot-a-3125	Thioredoxin-interacting protein	1	-	-	-	-	-	-	0.681493	0.281324	0.0154163	-	-	Protein
prot-a-1790	Leucine-rich repeat-containing protein 74A	1	-	-	-	-	-	-	0.682758	0.281846	0.0154163	-	-	Protein
prot-a-2128	Nucleoside diphosphate-linked moiety X motif 8, mitochondrial	1	-	-	-	-	-	-	0.698761	0.288452	0.0154163	-	-	Protein
prot-a-1955	Macrophage-stimulating protein receptor	1	-	-	-	-	-	-	0.700091	0.289001	0.0154163	-	-	Protein
prot-a-1963	Myotubularin-related protein 1	1	-	-	-	-	-	-	0.701575	0.289614	0.0154163	-	-	Protein
prot-a-2492	Rap guanine nucleotide exchange factor 5	1	-	-	-	-	-	-	0.704863	0.290971	0.0154163	-	-	Protein
prot-a-893	Early endosome antigen 1	1	-	-	-	-	-	-	0.70803	0.292278	0.0154163	-	-	Protein
prot-a-2922	Tachykinin-4	1	-	-	-	-	-	-	0.714604	0.294992	0.0154163	-	-	Protein
prot-a-2914	Synaptotagmin-3	1	-	-	-	-	-	-	0.715376	0.295311	0.0154163	-	-	Protein
prot-a-2107	Neurexin-3-beta	1	-	-	-	-	-	-	0.717081	0.296015	0.0154163	-	-	Protein
prot-a-2984	Thymidine kinase, cytosolic	1	-	-	-	-	-	-	0.727166	0.300178	0.0154163	-	-	Protein
prot-a-1703	Layilin	1	-	-	-	-	-	-	0.731344	0.301903	0.0154163	-	-	Protein
prot-a-2350	Calcineurin subunit B type 1	1	-	-	-	-	-	-	0.731667	0.302036	0.0154163	-	-	Protein
prot-a-158	Rho guanine nucleotide exchange factor 7	1	-	-	-	-	-	-	0.735897	0.303782	0.0154163	-	-	Protein
prot-a-937	EMI domain-containing protein 1	1	-	-	-	-	-	-	0.73869	0.304935	0.0154163	-	-	Protein
prot-a-2792	Sorting nexin-17	1	-	-	-	-	-	-	0.748717	0.309075	0.0154163	-	-	Protein
prot-a-2498	E3 ubiquitin-protein ligase RBBP6	1	-	-	-	-	-	-	0.755555	0.311897	0.0154163	-	-	Protein
prot-a-2264	Peptidase inhibitor 15	1	-	-	-	-	-	-	0.755727	0.311968	0.0154163	-	-	Protein
prot-a-711	Cardiotrophin-1	1	-	-	-	-	-	-	0.756764	0.312396	0.0154163	-	-	Protein
prot-a-11	Acetyl-CoA carboxylase 2	1	-	-	-	-	-	-	0.758499	0.313112	0.0154163	-	-	Protein
prot-b-10	coagulation factor III, tissue factor	1	-	-	-	-	-	-	0.758697	0.32375	0.0191054	-	-	Protein
prot-a-1681	Kremen protein 2	1	-	-	-	-	-	-	0.758847	0.313256	0.0154163	-	-	Protein
prot-a-2279	Phosphatidylinositol transfer protein beta isoform	1	-	-	-	-	-	-	0.762343	0.314699	0.0154163	-	-	Protein
prot-a-298	Type III endosome membrane protein TEMP	1	-	-	-	-	-	-	0.762858	0.331425	0.0213494	-	-	Protein
prot-a-1146	Follistatin-related protein 4	1	-	-	-	-	-	-	0.767858	0.275049	0.00524288	-	-	Protein
prot-a-206	Axin-2	1	-	-	-	-	-	-	0.779583	0.321816	0.0154163	-	-	Protein
prot-a-801	Beta-defensin 134	1	-	-	-	-	-	-	0.785318	0.324184	0.0154163	-	-	Protein
prot-a-1331	E3 ISG15--protein ligase HERC5	1	-	-	-	-	-	-	0.786625	0.324723	0.0154163	-	-	Protein
prot-a-736	Fractalkine	1	-	-	-	-	-	-	0.787936	0.325264	0.0154163	-	-	Protein
prot-a-252	Baculoviral IAP repeat-containing protein 5	1	-	-	-	-	-	-	0.789439	0.325885	0.0154163	-	-	Protein
prot-a-165	Armadillo repeat-containing protein 5	1	-	-	-	-	-	-	0.792464	0.327133	0.0154163	-	-	Protein
prot-a-3061	Tumor necrosis factor ligand superfamily member 4	1	-	-	-	-	-	-	0.803236	0.33158	0.0154163	-	-	Protein
prot-a-2625	Histone deacetylase complex subunit SAP18	1	-	-	-	-	-	-	0.806185	0.325388	0.0132264	-	-	Protein
prot-a-2888	Syntaxin-6	1	-	-	-	-	-	-	0.811508	0.334995	0.0154163	-	-	Protein
prot-a-2270	PIK3CA/PIK3R1	1	-	-	-	-	-	-	0.814424	0.318022	0.01044	-	-	Protein
prot-a-203	ATP synthase subunit beta, mitochondrial	1	-	-	-	-	-	-	0.816514	0.337061	0.0154163	-	-	Protein
prot-a-243	Transcription factor TFIIIB component B'' homolog	1	-	-	-	-	-	-	0.816514	0.337061	0.0154163	-	-	Protein
prot-a-2262	Membrane-associated progesterone receptor component 2	1	-	-	-	-	-	-	0.818533	0.337895	0.0154163	-	-	Protein
prot-a-2638	Scavenger receptor class A member 3	1	-	-	-	-	-	-	0.818736	0.337979	0.0154163	-	-	Protein
prot-a-2169	Serine/threonine-protein kinase PAK 3	1	-	-	-	-	-	-	0.822194	0.339406	0.0154163	-	-	Protein
prot-a-1805	Lymphotoxin alpha2:beta1	1	-	-	-	-	-	-	0.99466	0.34661	0.00410892	-	-	Protein

## Sheet: Table S4 allUnselectedResults
Table S4. All MR results, with diseases/traits and blood proteins as exposure and ACE2 lung expression as outcome.
id	Trait	Category	nsnps	b_IVW	se_IVW	pval_IVW	b_Egger	se_Egger	pval_Egger	b_Wald	se_Wald	pval_Wald	Egger_intercept	pval_intercept	zscore	FDR
ieu-a-32	Ulcerative colitis	autoimmune	29	0.0256345	0.0596059	0.667147	0.585521	0.177456	0.00272387	-	-	-	-0.104897	0.00266601	3.29954	0.0538091
ukb-b-10753	Diabetes diagnosed by doctor	diabetology	58	3.71396	1.56957	0.0179706	-0.36924	3.4297	0.914651	-	-	-	0.0213035	0.186765	2.36622	0.0547132
ukb-b-8388	Started insulin within one year diagnosis of diabetes	diabetology	7	0.730271	0.332584	0.0281101	0.72733	0.658787	0.319852	-	-	-	0.000203441	0.996073	2.19575	0.0605513
ukb-b-12948	Non-cancer illness code, self-reported: diabetes	diabetology	49	4.21336	2.02112	0.0370995	5.02431	4.63196	0.283585	-	-	-	-0.00352659	0.846197	2.08467	0.0667248
ukb-b-10694	Diagnoses - secondary ICD10: E10.9 Type 1 diabetes mellitus without complications	diabetology	3	21.7782	10.6278	0.0404459	29.953	25.1897	0.445144	-	-	-	-0.0247563	0.781169	2.04917	0.0713412
ieu-a-23	Type 2 diabetes	diabetology	25	0.210267	0.103432	0.0420626	0.159974	0.403835	0.695655	-	-	-	0.00530824	0.898608	2.0329	0.0747784
ieu-a-779	Fasting insulin	diabetology	14	1.4121	0.781651	0.0708314	4.99432	4.16763	0.253909	-	-	-	-0.0613439	0.398716	1.80656	0.0821949
prot-a-1346	HLA class II histocompatibility antigen, DP beta 1 chain	Protein	2	0.729321	0.194663	0.000179256	-	-	-	-	-	-	-	-	3.74659	0.0878339
ukb-b-17532	Diagnoses - secondary ICD10: E14.9 Unspecified diabetes mellitus without complications	diabetology	1	-	-	-	-	-	-	126.495	70.9957	0.074794	-	-	1.78173	0.0926374
ukb-d-30750_raw	Glycated haemoglobin	diabetology	124	0.0448515	0.0266338	0.0921809	-0.0215381	0.0504908	0.670441	-	-	-	0.0141362	0.124278	1.684	0.0983138
ieu-a-777	Fasting glucose	diabetology	32	0.601541	0.365473	0.0997793	-0.0267796	0.776696	0.972724	-	-	-	0.0190709	0.366211	1.64592	0.103653
ukb-b-18194	Non-cancer illness code, self-reported: ankylosing spondylitis	autoimmune	3	26.9764	11.1679	0.0157128	15.8374	335.491	0.96997	-	-	-	0.0301634	0.978859	2.41552	0.111949
ukb-d-M48	Diagnoses - main ICD10: M48 Other spondylopathies	autoimmune	1	-	-	-	-	-	-	121.699	50.6742	0.0163239	-	-	2.40159	0.119257
ieu-a-292	Inflammatory bowel disease	autoimmune	107	0.0033557	0.0428814	0.937625	0.245764	0.10337	0.019239	-	-	-	-0.0308646	0.0113461	2.37752	0.125992
ukb-b-970	Diagnoses - secondary ICD10: E11.9 Type 2 diabetes Without complications	diabetology	31	4.33857	3.30983	0.189921	-9.09971	8.05067	0.26761	-	-	-	0.0416613	0.0773753	1.31081	0.133335
ieu-a-1089	Body mass index	Obesity	1	-	-	-	-	-	-	3.62618	1.23693	0.00337217	-	-	2.9316	0.140151
prot-a-780	Deformed epidermal autoregulatory factor 1 homolog	Protein	2	0.587854	0.179749	0.00107386	-	-	-	-	-	-	-	-	3.27042	0.146702
ukb-d-30770_raw	IGF-1	diabetology	254	0.0271857	0.0220708	0.218043	0.0464561	0.0420487	0.270293	-	-	-	-0.00354653	0.590564	1.23175	0.152869
ieu-a-30	Crohn's disease	autoimmune	41	0.0105601	0.0389775	0.786447	0.196136	0.0895655	0.034581	-	-	-	-0.0442621	0.0268041	2.18986	0.159015
ukb-b-15272	Ever manic/hyper for 2 days	psy	2	20.6933	6.45418	0.0013451	-	-	-	-	-	-	-	-	3.20618	0.164909
ieu-a-31	Inflammatory bowel disease	autoimmune	49	-0.0137523	0.0498546	0.782665	0.286596	0.13274	0.0359812	-	-	-	-0.0509689	0.0191244	2.15907	0.170371
prot-a-61	Alpha-2-HS-glycoprotein	Protein	2	0.251189	0.0790566	0.00148639	-	-	-	-	-	-	-	-	3.17733	0.175492
ieu-a-770	HOMA-B	diabetology	2	1.12065	1.08013	0.299496	-	-	-	-	-	-	-	-	1.03751	0.181537
ieu-a-1090	Type 2 diabetes	diabetology	1	-	-	-	-	-	-	0.130722	0.167939	0.436341	-	-	0.778387	0.19047
ukb-d-30740_raw	Glucose	diabetology	44	0.218339	0.284009	0.442027	-0.524816	0.620574	0.402515	-	-	-	0.0263207	0.186296	0.768774	0.198811
prot-a-1805	Lymphotoxin alpha2:beta1	Protein	1	-	-	-	-	-	-	0.99466	0.34661	0.00410892	-	-	2.86968	0.20658
prot-a-1146	Follistatin-related protein 4	Protein	1	-	-	-	-	-	-	0.767858	0.275049	0.00524288	-	-	2.79172	0.214963
ukb-d-30620_raw	Alanine aminotransferase	GI	91	0.0473918	0.0176869	0.00737336	0.0805578	0.0389026	0.041278	-	-	-	-0.0124392	0.341067	2.67949	0.222881
ieu-a-776	2hr glucose	diabetology	7	0.142583	0.23082	0.536756	0.76549	1.18801	0.547743	-	-	-	-0.0594278	0.615891	0.617726	0.230621
prot-a-1398	Intercellular adhesion molecule 2	Protein	2	0.537274	0.200561	0.00738734	-	-	-	-	-	-	-	-	2.67886	0.238938
prot-a-1369	Haptoglobin	Protein	5	0.148319	0.0558883	0.00795808	0.100909	0.135266	0.509801	-	-	-	0.030633	0.725991	2.65384	0.247057
prot-a-2018	Kinetochore protein NDC80 homolog	Protein	2	0.598679	0.230684	0.00945252	-	-	-	-	-	-	-	-	2.59524	0.255435
prot-a-2270	PIK3CA/PIK3R1	Protein	1	-	-	-	-	-	-	0.814424	0.318022	0.01044	-	-	2.56091	0.26374
ieu-a-1134	ER+ Breast cancer (GWAS)	cancer	7	0.175854	0.0754609	0.0197852	0.538867	0.295275	0.127591	-	-	-	-0.094362	0.25944	2.3304	0.271849
ieu-a-300	LDL cholesterol	diabetology	78	0.029016	0.100846	0.773557	-0.0933113	0.14639	0.525769	-	-	-	0.0109647	0.252605	0.287725	0.279753
ieu-a-769	Fasting proinsulin	diabetology	6	0.0972329	0.352721	0.782805	0.797167	0.756169	0.35125	-	-	-	-0.0609968	0.355466	0.275665	0.287315
prot-a-1478	Interleukin-15 receptor subunit alpha	Protein	1	-	-	-	-	-	-	0.439789	0.176081	0.0125018	-	-	2.49766	0.294567
prot-a-1216	D-glucuronyl C5-epimerase	Protein	1	-	-	-	-	-	-	0.153729	0.0615661	0.0125258	-	-	2.49697	0.301444
ukb-b-8549	Diagnoses - main ICD10: D24 Benign neoplasm of breast	cancer	1	-	-	-	-	-	-	142.714	62.4738	0.0223486	-	-	2.28439	0.308026
prot-a-2625	Histone deacetylase complex subunit SAP18	Protein	1	-	-	-	-	-	-	0.806185	0.325388	0.0132264	-	-	2.47761	0.314421
prot-a-3242	DNA repair protein XRCC4	Protein	2	0.331348	0.134486	0.0137471	-	-	-	-	-	-	-	-	2.46381	0.320642
prot-a-3254	Tyrosine-protein kinase ZAP-70	Protein	3	0.395178	0.161036	0.0141292	0.629288	0.300866	0.283919	-	-	-	-0.0595812	0.526103	2.45396	0.326661
prot-a-1607	Histone acetyltransferase KAT6A	Protein	2	0.449936	0.183571	0.0142451	-	-	-	-	-	-	-	-	2.45102	0.332428
prot-a-1331	E3 ISG15--protein ligase HERC5	Protein	1	-	-	-	-	-	-	0.786625	0.324723	0.0154163	-	-	2.42245	0.338195
prot-a-306	Complement C1q and tumor necrosis factor-related protein 9A	Protein	1	-	-	-	-	-	-	0.512677	0.211636	0.0154163	-	-	2.42245	0.343705
prot-a-165	Armadillo repeat-containing protein 5	Protein	1	-	-	-	-	-	-	0.792464	0.327133	0.0154163	-	-	2.42245	0.348976
prot-a-893	Early endosome antigen 1	Protein	1	-	-	-	-	-	-	0.70803	0.292278	0.0154163	-	-	2.42245	0.354023
prot-a-1529	Interleukin-37	Protein	1	-	-	-	-	-	-	0.641841	0.264955	0.0154163	-	-	2.42245	0.358859
prot-a-950	Ectonucleoside triphosphate diphosphohydrolase 1	Protein	1	-	-	-	-	-	-	0.584687	0.241362	0.0154163	-	-	2.42245	0.363498
prot-a-1134	Glutamate carboxypeptidase 2	Protein	1	-	-	-	-	-	-	0.539506	0.222711	0.0154163	-	-	2.42245	0.367951
prot-a-2792	Sorting nexin-17	Protein	1	-	-	-	-	-	-	0.748717	0.309075	0.0154163	-	-	2.42245	0.37223
prot-a-2128	Nucleoside diphosphate-linked moiety X motif 8, mitochondrial	Protein	1	-	-	-	-	-	-	0.698761	0.288452	0.0154163	-	-	2.42245	0.376344
prot-a-2503	RNA-binding protein 24	Protein	1	-	-	-	-	-	-	0.642588	0.265264	0.0154163	-	-	2.42245	0.380303
prot-a-327	Carbonic anhydrase-related protein 10	Protein	1	-	-	-	-	-	-	0.640103	0.264238	0.0154163	-	-	2.42245	0.384115
prot-a-736	Fractalkine	Protein	1	-	-	-	-	-	-	0.787936	0.325264	0.0154163	-	-	2.42245	0.387789
prot-a-2949	Testis-expressed sequence 29 protein	Protein	1	-	-	-	-	-	-	0.616607	0.254539	0.0154163	-	-	2.42245	0.391331
prot-a-1141	Secreted frizzled-related protein 3	Protein	1	-	-	-	-	-	-	0.661073	0.272894	0.0154163	-	-	2.42245	0.394749
prot-a-2909	Heterogeneous nuclear ribonucleoprotein Q	Protein	1	-	-	-	-	-	-	0.647238	0.267184	0.0154163	-	-	2.42245	0.39805
prot-a-252	Baculoviral IAP repeat-containing protein 5	Protein	1	-	-	-	-	-	-	0.789439	0.325885	0.0154163	-	-	2.42245	0.401238
prot-a-1790	Leucine-rich repeat-containing protein 74A	Protein	1	-	-	-	-	-	-	0.682758	0.281846	0.0154163	-	-	2.42245	0.40432
prot-a-2264	Peptidase inhibitor 15	Protein	1	-	-	-	-	-	-	0.755727	0.311968	0.0154163	-	-	2.42245	0.407301
prot-a-158	Rho guanine nucleotide exchange factor 7	Protein	1	-	-	-	-	-	-	0.735897	0.303782	0.0154163	-	-	2.42245	0.410186
prot-a-2888	Syntaxin-6	Protein	1	-	-	-	-	-	-	0.811508	0.334995	0.0154163	-	-	2.42245	0.412979
prot-a-2350	Calcineurin subunit B type 1	Protein	1	-	-	-	-	-	-	0.731667	0.302036	0.0154163	-	-	2.42245	0.415685
prot-a-1963	Myotubularin-related protein 1	Protein	1	-	-	-	-	-	-	0.701575	0.289614	0.0154163	-	-	2.42245	0.418308
prot-a-2922	Tachykinin-4	Protein	1	-	-	-	-	-	-	0.714604	0.294992	0.0154163	-	-	2.42245	0.420851
prot-a-711	Cardiotrophin-1	Protein	1	-	-	-	-	-	-	0.756764	0.312396	0.0154163	-	-	2.42245	0.423319
prot-a-11	Acetyl-CoA carboxylase 2	Protein	1	-	-	-	-	-	-	0.758499	0.313112	0.0154163	-	-	2.42245	0.425714
prot-a-1443	Insulin-like growth factor I	Protein	1	-	-	-	-	-	-	0.648888	0.267865	0.0154163	-	-	2.42245	0.428039
prot-a-2863	Stabilin-2	Protein	1	-	-	-	-	-	-	0.562047	0.232016	0.0154163	-	-	2.42245	0.430298
prot-a-2984	Thymidine kinase, cytosolic	Protein	1	-	-	-	-	-	-	0.727166	0.300178	0.0154163	-	-	2.42245	0.432493
prot-a-2107	Neurexin-3-beta	Protein	1	-	-	-	-	-	-	0.717081	0.296015	0.0154163	-	-	2.42245	0.434627
prot-a-2279	Phosphatidylinositol transfer protein beta isoform	Protein	1	-	-	-	-	-	-	0.762343	0.314699	0.0154163	-	-	2.42245	0.436703
prot-a-206	Axin-2	Protein	1	-	-	-	-	-	-	0.779583	0.321816	0.0154163	-	-	2.42245	0.438723
prot-a-1343	Hexokinase-1	Protein	1	-	-	-	-	-	-	0.516357	0.213155	0.0154163	-	-	2.42245	0.440689
prot-a-417	Cell cycle progression protein 1	Protein	1	-	-	-	-	-	-	0.676616	0.279311	0.0154163	-	-	2.42245	0.442603
prot-a-3063	Tumor necrosis factor ligand superfamily member 8	Protein	1	-	-	-	-	-	-	0.661337	0.273003	0.0154163	-	-	2.42245	0.444468
prot-a-1703	Layilin	Protein	1	-	-	-	-	-	-	0.731344	0.301903	0.0154163	-	-	2.42245	0.446284
prot-a-129	Apolipoprotein D	Protein	1	-	-	-	-	-	-	0.671128	0.277045	0.0154163	-	-	2.42245	0.448055
prot-a-1865	Mast cell-expressed membrane protein 1	Protein	1	-	-	-	-	-	-	0.526963	0.217533	0.0154163	-	-	2.42245	0.449781
prot-a-2498	E3 ubiquitin-protein ligase RBBP6	Protein	1	-	-	-	-	-	-	0.755555	0.311897	0.0154163	-	-	2.42245	0.451465
prot-a-1955	Macrophage-stimulating protein receptor	Protein	1	-	-	-	-	-	-	0.700091	0.289001	0.0154163	-	-	2.42245	0.453108
prot-a-1635	Kinesin-like protein KIF16B	Protein	1	-	-	-	-	-	-	0.623931	0.257562	0.0154163	-	-	2.42245	0.454711
prot-a-2492	Rap guanine nucleotide exchange factor 5	Protein	1	-	-	-	-	-	-	0.704863	0.290971	0.0154163	-	-	2.42245	0.456276
prot-a-2169	Serine/threonine-protein kinase PAK 3	Protein	1	-	-	-	-	-	-	0.822194	0.339406	0.0154163	-	-	2.42245	0.457804
prot-a-801	Beta-defensin 134	Protein	1	-	-	-	-	-	-	0.785318	0.324184	0.0154163	-	-	2.42245	0.459296
prot-a-3173	Uroplakin-3b-like protein	Protein	1	-	-	-	-	-	-	0.641592	0.264853	0.0154163	-	-	2.42245	0.460755
prot-a-650	Cellular retinoic acid-binding protein 1	Protein	1	-	-	-	-	-	-	0.622055	0.256787	0.0154163	-	-	2.42245	0.46218
prot-a-3125	Thioredoxin-interacting protein	Protein	1	-	-	-	-	-	-	0.681493	0.281324	0.0154163	-	-	2.42245	0.463573
prot-a-203	ATP synthase subunit beta, mitochondrial	Protein	1	-	-	-	-	-	-	0.816514	0.337061	0.0154163	-	-	2.42245	0.464935
prot-a-243	Transcription factor TFIIIB component B'' homolog	Protein	1	-	-	-	-	-	-	0.816514	0.337061	0.0154163	-	-	2.42245	0.466267
prot-a-2262	Membrane-associated progesterone receptor component 2	Protein	1	-	-	-	-	-	-	0.818533	0.337895	0.0154163	-	-	2.42245	0.46757
prot-a-2853	Alpha-N-acetylgalactosaminide alpha-2,6-sialyltransferase 2	Protein	1	-	-	-	-	-	-	0.568223	0.234565	0.0154163	-	-	2.42245	0.468845
prot-a-2638	Scavenger receptor class A member 3	Protein	1	-	-	-	-	-	-	0.818736	0.337979	0.0154163	-	-	2.42245	0.470094
prot-a-637	Cytochrome c oxidase subunit 4 isoform 2, mitochondrial	Protein	1	-	-	-	-	-	-	0.570181	0.235374	0.0154163	-	-	2.42245	0.471315
prot-a-937	EMI domain-containing protein 1	Protein	1	-	-	-	-	-	-	0.73869	0.304935	0.0154163	-	-	2.42245	0.472512
prot-a-3061	Tumor necrosis factor ligand superfamily member 4	Protein	1	-	-	-	-	-	-	0.803236	0.33158	0.0154163	-	-	2.42245	0.473683
prot-a-1681	Kremen protein 2	Protein	1	-	-	-	-	-	-	0.758847	0.313256	0.0154163	-	-	2.42245	0.474831
prot-a-2914	Synaptotagmin-3	Protein	1	-	-	-	-	-	-	0.715376	0.295311	0.0154163	-	-	2.42245	0.475956
ukb-d-C34	Diagnoses - main ICD10: C34 Malignant neoplasm of bronchus and lung	cancer	1	-	-	-	-	-	-	104.073	47.6642	0.0290019	-	-	2.18346	0.477179
ukb-b-11874	Diagnoses - secondary ICD10: M06.99 Rheumatoid arthritis, unspecified (Site unspecified)	autoimmune	1	-	-	-	-	-	-	29.8444	23.0703	0.195793	-	-	1.29363	0.478378
prot-a-3191	Valine--tRNA ligase	Protein	1	-	-	-	-	-	-	0.137345	0.0576661	0.0172314	-	-	2.38173	0.479594
prot-a-612	Cytochrome c oxidase assembly factor 3 homolog, mitochondrial	Protein	3	0.406947	0.171014	0.0173311	0.779911	0.370156	0.282107	-	-	-	-0.0816331	0.45949	2.37961	0.480794
prot-a-493	Cyclin-dependent kinase 5:Cyclin-dependent kinase 5 activator 1 complex	Protein	2	0.423252	0.178085	0.0174686	-	-	-	-	-	-	-	-	2.37669	0.481982
prot-a-376	Chromobox protein homolog 5	Protein	2	0.460686	0.193948	0.0175342	-	-	-	-	-	-	-	-	2.37531	0.483153
prot-a-3086	Tropomyosin beta chain	Protein	2	0.449067	0.189126	0.0175758	-	-	-	-	-	-	-	-	2.37444	0.484305
prot-a-869	Desmoglein-1	Protein	2	0.435759	0.183771	0.0177302	-	-	-	-	-	-	-	-	2.3712	0.485447
ukb-b-6514	Non-cancer illness code, self-reported: hiatus hernia	GI	2	38.8008	17.1826	0.0239362	-	-	-	-	-	-	-	-	2.25815	0.486593
ukb-b-8848	Diagnoses - main ICD10: K44.9 Diaphragmatic hernia without obstruction or gangrene	GI	1	-	-	-	-	-	-	61.7911	27.3913	0.0240793	-	-	2.25586	0.487727
prot-a-280	Uncharacterized protein C10orf35	Protein	2	0.42692	0.180867	0.0182549	-	-	-	-	-	-	-	-	2.36041	0.488845
prot-a-1524	Interleukin-34	Protein	2	0.426927	0.181077	0.0183878	-	-	-	-	-	-	-	-	2.35771	0.489953
prot-a-2271	Phosphatidylinositol 4,5-bisphosphate 3-kinase catalytic subunit gamma isoform	Protein	2	0.427413	0.182234	0.0190061	-	-	-	-	-	-	-	-	2.34541	0.491084
prot-b-10	coagulation factor III, tissue factor	Protein	1	-	-	-	-	-	-	0.758697	0.32375	0.0191054	-	-	2.34347	0.492202
prot-a-331	Carbonic anhydrase 4	Protein	2	0.438221	0.187888	0.0196821	-	-	-	-	-	-	-	-	2.33235	0.493337
prot-a-238	Bcl-2-like protein 1	Protein	2	0.443424	0.190214	0.0197435	-	-	-	-	-	-	-	-	2.33119	0.494457
ieu-a-1058	Celiac disease	autoimmune	13	0.0629047	0.051362	0.220676	0.150241	0.0754799	0.0719684	-	-	-	-0.0373259	0.142633	1.22473	0.495559
ukb-b-9125	Non-cancer illness code, self-reported: rheumatoid arthritis	autoimmune	6	7.63659	6.24313	0.221254	16.5608	10.0801	0.175744	-	-	-	-0.0403524	0.322529	1.2232	0.496647
prot-a-322	Complement component C8	Protein	2	0.465745	0.200019	0.0198853	-	-	-	-	-	-	-	-	2.3285	0.497719
ukb-d-M13_POLYARTHROPATHIES	#Polyarthropathies	autoimmune	1	-	-	-	-	-	-	16.7253	13.8951	0.228712	-	-	1.20368	0.498826
ukb-b-17219	Diagnoses - secondary ICD10: J45.9 Asthma, unspecified	resp	19	6.5329	3.17286	0.0394946	20.4549	10.7991	0.0753512	-	-	-	-0.0570278	0.195124	2.059	0.499923
prot-a-298	Type III endosome membrane protein TEMP	Protein	1	-	-	-	-	-	-	0.762858	0.331425	0.0213494	-	-	2.30175	0.501027
ieu-a-1013	Glioma	cancer	3	0.200028	0.095755	0.0367114	0.437861	0.736997	0.65872	-	-	-	-0.0704592	0.799686	2.08896	0.50212
ieu-a-758	HbA1C	diabetology	11	-0.0185874	0.441684	0.966433	1.81611	1.03146	0.112135	-	-	-	-0.0782243	0.0805579	-0.0420829	0.503209
ukb-b-16499	Non-cancer illness code, self-reported: hayfever/allergic rhinitis	autoimmune	29	2.84748	2.41165	0.237714	5.58372	8.58943	0.521141	-	-	-	-0.0117799	0.742521	1.18072	0.50429
ukb-b-8425	Non-cancer illness code, self-reported: nasal polyps	ENT	6	30.0308	20.9141	0.151027	97.7538	191.928	0.637336	-	-	-	-0.0671423	0.740537	1.43591	0.50538
prot-a-28	Disintegrin and metalloproteinase domain-containing protein 23	Protein	5	0.194146	0.0850664	0.0224721	-0.253768	0.568352	0.6855	-	-	-	0.183089	0.483663	2.28229	0.506455
ukb-d-C_RESPIRATORY_INTRATHORACIC	Cancer of respiratory intrathoracic	cancer	3	82.0758	39.6778	0.0385879	63.4095	110.791	0.669066	-	-	-	0.0335098	0.877898	2.06855	0.507522
ukb-d-C3_RESPIRATORY_INTRATHORACIC	Malignant neoplasm of respiratory system and intrathoracic organs	cancer	3	82.0758	39.6778	0.0385879	63.4095	110.791	0.669066	-	-	-	0.0335098	0.877898	2.06855	0.508573
ukb-b-5115	Diagnoses - secondary ICD10: Z72.0 Tobacco use	Behavioural	3	32.3535	13.4215	0.0159272	23.4632	86.054	0.830541	-	-	-	0.0204659	0.93304	2.41058	0.509636
ieu-a-1	Adiponectin	diabetology	11	-0.0246043	0.223286	0.912257	0.212148	0.321722	0.526141	-	-	-	-0.0253448	0.333398	-0.110192	0.510731
prot-a-3179	Ubiquitin carboxyl-terminal hydrolase 21	Protein	1	-	-	-	-	-	-	0.209982	0.09356	0.0248097	-	-	2.24435	0.511832
prot-a-524	Cofilin-1	Protein	1	-	-	-	-	-	-	0.298455	0.132981	0.0248097	-	-	2.24435	0.512916
prot-a-1876	Mediator of RNA polymerase II transcription subunit 4	Protein	1	-	-	-	-	-	-	0.247845	0.110431	0.0248097	-	-	2.24435	0.513984
prot-a-1828	Melanoma-associated antigen 3	Protein	1	-	-	-	-	-	-	0.374631	0.166922	0.0248097	-	-	2.24435	0.515036
prot-a-65	Endothelial monocyte-activating polypeptide 2	Protein	1	-	-	-	-	-	-	0.312663	0.139311	0.0248097	-	-	2.24435	0.516072
prot-a-3014	Transmembrane protein 59-like	Protein	1	-	-	-	-	-	-	0.48379	0.215559	0.0248097	-	-	2.24435	0.517093
prot-a-952	Ectonucleoside triphosphate diphosphohydrolase 3	Protein	2	0.486476	0.217052	0.0250075	-	-	-	-	-	-	-	-	2.24129	0.518107
prot-a-173	Arylsulfatase K	Protein	2	0.361084	0.161161	0.0250577	-	-	-	-	-	-	-	-	2.24051	0.519109
prot-a-661	Cysteine-rich secretory protein 2	Protein	1	-	-	-	-	-	-	0.169321	0.0756741	0.0252532	-	-	2.23751	0.520104
prot-a-146	Arfaptin-2	Protein	1	-	-	-	-	-	-	0.559962	0.251511	0.0259881	-	-	2.22639	0.521115
prot-a-2438	Tyrosine-protein phosphatase non-receptor type 1	Protein	2	0.400944	0.180334	0.0261928	-	-	-	-	-	-	-	-	2.22334	0.522118
prot-a-617	Endostatin	Protein	1	-	-	-	-	-	-	0.434303	0.195753	0.0265118	-	-	2.21863	0.52312
prot-a-2245	Platelet endothelial cell adhesion molecule	Protein	3	0.376599	0.169753	0.0265199	1.05261	0.507256	0.285884	-	-	-	-0.148515	0.391854	2.21851	0.524108
ukb-d-M13_RHEUMA	Rheumatoid arthritis	autoimmune	2	13.7742	12.6368	0.27571	-	-	-	-	-	-	-	-	1.09001	0.525098
ukb-d-M06	Diagnoses - main ICD10: M06 Other rheumatoid arthritis	autoimmune	2	15.0142	13.9357	0.281305	-	-	-	-	-	-	-	-	1.07739	0.526103
prot-a-3088	Thyroid peroxidase	Protein	2	0.533839	0.242687	0.0278283	-	-	-	-	-	-	-	-	2.1997	0.527097
ukb-b-11412	Diagnoses - main ICD10: R04.0 Epistaxis	ENT	1	-	-	-	-	-	-	92.1841	68.5329	0.17859	-	-	1.34511	0.528077
ukb-d-STILL_ADULT	Adult-onset Still disease	autoimmune	2	14.9074	13.8828	0.28291	-	-	-	-	-	-	-	-	1.0738	0.529048
prot-a-372	Cerebellin-4	Protein	2	0.441886	0.203763	0.0301106	-	-	-	-	-	-	-	-	2.16863	0.530076
prot-a-471	CD97 antigen	Protein	2	0.435839	0.201341	0.0304124	-	-	-	-	-	-	-	-	2.16468	0.5311
ieu-a-1130	Breast cancer (iCOGS)	cancer	36	-0.000771823	0.0861305	0.99285	0.36018	0.185685	0.0607442	-	-	-	-0.0449325	0.0374084	1.93974	0.532138
prot-a-1800	Leucine-rich repeat and transmembrane domain-containing protein 2	Protein	2	0.413589	0.192229	0.0314339	-	-	-	-	-	-	-	-	2.15154	0.533165
ieu-a-1059	Celiac disease	autoimmune	9	0.0871649	0.0865585	0.313932	-0.0848775	0.290631	0.778717	-	-	-	0.0384803	0.554832	1.00701	0.534205
ieu-a-106	Weight	Obesity	7	0.628812	0.362777	0.083037	-0.810621	1.83251	0.676712	-	-	-	0.0779075	0.459297	1.73333	0.535251
prot-a-2810	SPARC-like protein 1	Protein	2	0.481931	0.228504	0.0349389	-	-	-	-	-	-	-	-	2.10907	0.536332
prot-a-1758	Lamin-B1	Protein	1	-	-	-	-	-	-	0.429856	0.205435	0.0364009	-	-	2.09242	0.537435
ieu-a-833	Rheumatoid arthritis	autoimmune	52	0.043497	0.0458823	0.343123	0.0370051	0.0745718	0.621904	-	-	-	0.0013521	0.912508	0.948012	0.538531
prot-a-2307	Plexin-A1	Protein	1	-	-	-	-	-	-	0.42303	0.204548	0.0386286	-	-	2.06812	0.539656
ukb-b-6352	Type of cancer: ICD10: C50.4 Upper-outer quadrant of breast	cancer	4	32.1255	17.3824	0.0645795	-20.2184	87.8902	0.839446	-	-	-	0.0834263	0.603471	1.84816	0.540779
ieu-a-761	Corrected insulin response	diabetology	2	-0.219829	0.493056	0.655706	-	-	-	-	-	-	-	-	-0.44585	0.541894
prot-a-1126	Receptor-type tyrosine-protein kinase FLT3	Protein	3	0.347583	0.168807	0.0394882	0.839821	0.382053	0.271798	-	-	-	-0.10602	0.388353	2.05906	0.542996
prot-a-1148	Ferritin	Protein	3	0.203302	0.0990567	0.0401328	0.274474	0.267795	0.492159	-	-	-	-0.0249789	0.810427	2.05238	0.544098
prot-a-123	Amyloid-like protein 2	Protein	1	-	-	-	-	-	-	0.611573	0.297993	0.04014	-	-	2.05231	0.545186
prot-a-1622	Vascular endothelial growth factor receptor 2	Protein	4	0.140824	0.0689303	0.0410534	0.157965	0.133351	0.357876	-	-	-	-0.00905531	0.894179	2.04299	0.54628
prot-a-2829	Spondin-1	Protein	2	0.227714	0.111994	0.0420253	-	-	-	-	-	-	-	-	2.03327	0.547378
prot-a-467	T-cell surface glycoprotein CD8 beta chain	Protein	2	0.526115	0.259025	0.0422408	-	-	-	-	-	-	-	-	2.03114	0.548468
prot-a-1133	Fibronectin type III domain-containing protein 5	Protein	1	-	-	-	-	-	-	0.417697	0.207582	0.044198	-	-	2.01221	0.549581
prot-a-1807	Tumor necrosis factor receptor superfamily member 3	Protein	2	0.413764	0.206558	0.0451625	-	-	-	-	-	-	-	-	2.00314	0.550697
ieu-a-1060	Celiac disease	autoimmune	7	0.0752581	0.0894487	0.400149	0.422182	0.73309	0.589636	-	-	-	-0.0788444	0.653615	0.841354	0.55181
ieu-a-1034	Height	Anthropology	4	0.636216	0.320155	0.0468987	2.06013	7.38371	0.806441	-	-	-	-0.117651	0.864763	1.98721	0.552912
prot-a-2155	Oncostatin-M	Protein	2	0.430445	0.216284	0.0465704	-	-	-	-	-	-	-	-	1.99019	0.554012
ukb-d-30070_irnt	Red blood cell (erythrocyte) distribution width	Haematology	225	0.24282	0.104706	0.0203911	0.348699	0.188522	0.0656876	-	-	-	-0.00442604	0.500139	2.31907	0.555101
ieu-a-44	Asthma	resp	8	0.20543	0.118665	0.0834207	0.259587	0.773467	0.748586	-	-	-	-0.00788982	0.945814	1.73117	0.556178
ukb-d-KNEE_ARTHROSIS	Gonarthrosis [arthrosis of knee](FG)	autoimmune	3	8.6246	10.5876	0.415306	45.1207	154.404	0.819003	-	-	-	-0.0962062	0.851597	0.814592	0.557267
prot-a-2485	DNA repair protein RAD51 homolog 1	Protein	2	0.442073	0.224656	0.0490935	-	-	-	-	-	-	-	-	1.96778	0.558356
prot-a-1793	Leucine-rich repeat neuronal protein 1	Protein	1	-	-	-	-	-	-	0.362675	0.184474	0.049299	-	-	1.966	0.559436
prot-a-1874	Mediator of RNA polymerase II transcription subunit 1	Protein	1	-	-	-	-	-	-	0.649118	0.332008	0.0505685	-	-	1.95512	0.560522
prot-b-16	C-X-C motif chemokine ligand 1	Protein	1	-	-	-	-	-	-	0.38389	0.196415	0.0506443	-	-	1.95448	0.561597
ukb-d-I9_NONRHEVALV	Non-rheumatic valve diseases	autoimmune	1	-	-	-	-	-	-	30.1583	39.6704	0.447122	-	-	0.760221	0.562701
ukb-b-20017	Diagnoses - secondary ICD10: K29.8 Duodenitis	GI	1	-	-	-	-	-	-	67.9433	37.4724	0.0698075	-	-	1.81316	0.563803
ukb-d-R59	Diagnoses - main ICD10: R59 Enlarged lymph nodes	autoimmune	1	-	-	-	-	-	-	29.3081	39.0217	0.45261	-	-	0.751071	0.564895
prot-a-900	Ephrin-A4	Protein	1	-	-	-	-	-	-	0.729671	0.382421	0.0563869	-	-	1.90803	0.565997
prot-a-2423	Persephin	Protein	1	-	-	-	-	-	-	0.699463	0.368449	0.0576435	-	-	1.8984	0.567101
prot-a-175	Ecto-ADP-ribosyltransferase 3	Protein	2	0.308326	0.162634	0.0579824	-	-	-	-	-	-	-	-	1.89583	0.568197
prot-a-427	B-cell receptor CD22	Protein	2	0.437409	0.231223	0.0585289	-	-	-	-	-	-	-	-	1.89172	0.569288
prot-a-960	Ephrin type-B receptor 2	Protein	1	-	-	-	-	-	-	0.379014	0.200581	0.0588134	-	-	1.88959	0.57037
prot-a-961	Ephrin type-B receptor 2	Protein	1	-	-	-	-	-	-	0.282249	0.149371	0.0588134	-	-	1.88959	0.571441
prot-a-962	Ephrin type-B receptor 2	Protein	1	-	-	-	-	-	-	0.425179	0.225012	0.0588134	-	-	1.88959	0.5725
ukb-b-13354	Whole body fat-free mass	Obesity	451	-0.136487	0.188373	0.468724	0.648782	0.438007	0.139251	-	-	-	-0.0117124	0.047657	1.48121	0.573549
prot-a-388	C-C motif chemokine 1	Protein	2	0.51088	0.271391	0.0597748	-	-	-	-	-	-	-	-	1.88245	0.574596
ukb-b-13806	Non-cancer illness code, self-reported: type 2 diabetes	diabetology	2	-16.8088	19.8661	0.397493	-	-	-	-	-	-	-	-	-0.846107	0.575654
prot-a-1990	N-acylethanolamine-hydrolyzing acid amidase	Protein	2	0.148381	0.0795019	0.0619877	-	-	-	-	-	-	-	-	1.86638	0.576703
ieu-a-276	Celiac disease	autoimmune	10	0.055103	0.08138	0.498338	-0.108021	0.289877	0.719092	-	-	-	0.0363664	0.57383	0.677107	0.57775
prot-a-875	Dual specificity protein phosphatase 16	Protein	1	-	-	-	-	-	-	0.593782	0.321668	0.0649003	-	-	1.84594	0.578805
prot-a-225	BAG family molecular chaperone regulator 3	Protein	1	-	-	-	-	-	-	0.546227	0.297739	0.0665669	-	-	1.83459	0.579866
ieu-a-299	HDL cholesterol	CVD	84	0.0841716	0.129121	0.514476	0.563048	0.2402	0.0214941	-	-	-	-0.0257509	0.0204277	2.34408	0.580932
ieu-a-10	Crohn's disease	autoimmune	98	0.023732	0.0377509	0.52958	0.073877	0.0846465	0.384966	-	-	-	-0.00785033	0.509637	0.628647	0.581991
ukb-b-2307	Diagnoses - main ICD10: C50.9 Breast, unspecified	cancer	11	11.6336	7.28202	0.110137	13.5006	23.1591	0.574241	-	-	-	-0.00438288	0.934138	1.59758	0.583041
prot-a-1916	Matrix metalloproteinase-16	Protein	1	-	-	-	-	-	-	0.587153	0.32412	0.070059	-	-	1.81153	0.58409
ukb-b-14713	Forced vital capacity (FVC), Best measure	resp	241	0.32166	0.207986	0.121972	0.864929	0.561958	0.125094	-	-	-	-0.00975636	0.299094	1.54655	0.58513
ieu-a-1163	ER- Breast cancer (Survival)	cancer	1	-	-	-	-	-	-	0.243835	0.153665	0.112559	-	-	1.58679	0.586163
prot-a-1679	GTPase KRas	Protein	1	-	-	-	-	-	-	0.564109	0.312217	0.0707958	-	-	1.80678	0.587186
ukb-d-C3_BREAST_3	Malignant neoplasm of breast	cancer	14	7.46095	4.71303	0.11341	6.86336	12.1378	0.582184	-	-	-	0.0022305	0.957961	1.58305	0.588204
ukb-d-30650_raw	Aspartate aminotransferase	GI	68	0.0473678	0.0280398	0.0911609	0.0930015	0.0564069	0.103949	-	-	-	-0.0136034	0.354392	1.68931	0.589214
ukb-d-20544_5	Mental health problems ever diagnosed by a professional: Any other phobia (eg disabling fear of heights or spiders)	psy	1	-	-	-	-	-	-	30.612	16.9037	0.0701465	-	-	1.81096	0.590218
prot-a-428	CD226 antigen	Protein	1	-	-	-	-	-	-	0.593311	0.33054	0.0726579	-	-	1.79497	0.591216
prot-b-48	matrix metallopeptidase 10	Protein	4	0.265687	0.1492	0.0749551	0.42207	0.270721	0.259324	-	-	-	-0.0693651	0.544912	1.78074	0.592222
prot-a-1542	Interleukin-6 receptor subunit beta	Protein	4	0.211503	0.119298	0.0762476	0.348662	0.373643	0.449256	-	-	-	-0.0331224	0.735825	1.77289	0.593228
prot-a-80	Arachidonate 15-lipoxygenase B	Protein	1	-	-	-	-	-	-	0.457339	0.258703	0.0770915	-	-	1.76782	0.59423
ukb-b-7211	Diagnoses - main ICD10: J33.9 Nasal polyp, unspecified	ENT	3	25.9903	30.998	0.401777	63.1258	196.915	0.802505	-	-	-	-0.0354954	0.879873	0.838452	0.595246
prot-a-1582	Integrin alpha-5	Protein	3	0.361713	0.207442	0.0812144	1.1728	0.548088	0.278314	-	-	-	-0.161261	0.36089	1.74368	0.596257
ukb-d-FIBRO_COMORB	Fibromyalgia related co-morbidities	autoimmune	1	-	-	-	-	-	-	27.2286	50.9739	0.593225	-	-	0.534168	0.59726
ukb-d-RHEUMA_NOS	Other/unspecified rheumatoid arthritis	autoimmune	2	17.5502	32.9882	0.594715	-	-	-	-	-	-	-	-	0.532015	0.598255
prot-a-1987	Myeloid zinc finger 1	Protein	1	-	-	-	-	-	-	0.504636	0.29078	0.0826603	-	-	1.73545	0.599247
ukb-d-C3_BRONCHUS_LUNG	Malignant neoplasm of bronchus and lung	cancer	2	87.803	58.1442	0.13102	-	-	-	-	-	-	-	-	1.51009	0.600233
prot-a-212	Beta-1,4-glucuronyltransferase 1	Protein	2	0.1428	0.0825189	0.0835386	-	-	-	-	-	-	-	-	1.73051	0.601213
ukb-b-10537	Non-cancer illness code, self-reported: psoriasis	autoimmune	17	1.9986	3.92797	0.610883	3.43215	5.41706	0.535896	-	-	-	-0.00690099	0.706155	0.508813	0.602192
prot-a-2582	Tyrosine-protein kinase transmembrane receptor ROR2	Protein	1	-	-	-	-	-	-	0.473145	0.276169	0.0866678	-	-	1.71324	0.603172
prot-a-3053	Tumor necrosis factor receptor superfamily member 8	Protein	2	0.506311	0.29563	0.0867766	-	-	-	-	-	-	-	-	1.71265	0.604143
prot-a-1858	Matrilin-3	Protein	2	0.456557	0.269613	0.0903835	-	-	-	-	-	-	-	-	1.69338	0.605126
prot-a-164	Armadillo repeat-containing protein 5	Protein	1	-	-	-	-	-	-	0.254466	0.150429	0.0907224	-	-	1.6916	0.606102
prot-a-2725	Sialic acid-binding Ig-like lectin 12	Protein	2	0.0988929	0.0585613	0.0912753	-	-	-	-	-	-	-	-	1.68871	0.607072
ieu-a-793	Urate	CVD	4	0.0256042	0.0115836	0.0270785	0.02632	0.012367	0.167117	-	-	-	-0.00787048	0.883932	2.21038	0.608041
prot-a-1687	Keratin-associated protein 2-4	Protein	1	-	-	-	-	-	-	0.566079	0.338359	0.0943245	-	-	1.67301	0.60901
prot-a-1374	Ribonuclease UK114	Protein	1	-	-	-	-	-	-	0.245047	0.147044	0.095616	-	-	1.66649	0.609976
prot-a-2114	Neurotrophin-3	Protein	1	-	-	-	-	-	-	0.556616	0.334981	0.0965859	-	-	1.66164	0.610939
prot-a-1513	Interleukin-23 receptor	Protein	2	0.309008	0.186966	0.0983817	-	-	-	-	-	-	-	-	1.65275	0.611901
ieu-a-13	Crohn's disease	autoimmune	1	-	-	-	-	-	-	0.00948551	0.0233567	0.684658	-	-	0.406115	0.612867
prot-b-71	fatty acid binding protein 4	Protein	3	0.14174	0.0865056	0.101316	-0.204807	0.20959	0.507347	-	-	-	0.563313	0.330148	1.63851	0.613827
prot-a-1732	Galectin-9	Protein	2	0.323482	0.197859	0.102068	-	-	-	-	-	-	-	-	1.63491	0.614781
prot-a-2049	Nidogen-1	Protein	1	-	-	-	-	-	-	0.481652	0.295511	0.103123	-	-	1.6299	0.615732
ukb-b-8631	Non-cancer illness code, self-reported: malabsorption/coeliac disease	GI	13	10.0174	6.60854	0.129565	16.3185	10.4593	0.147004	-	-	-	-0.0215649	0.44853	1.51582	0.616675
prot-a-3159	NKG2D ligand 1	Protein	1	-	-	-	-	-	-	1.84165	1.13249	0.103907	-	-	1.6262	0.617613
ukb-b-3770	Diagnoses - main ICD10: J34.2 Deviated nasal septum	ENT	1	-	-	-	-	-	-	33.6361	48.6855	0.489637	-	-	0.690887	0.618548
prot-a-174	Ecto-ADP-ribosyltransferase 3	Protein	1	-	-	-	-	-	-	0.220083	0.136569	0.107068	-	-	1.61151	0.619483
prot-a-3180	Ubiquitin carboxyl-terminal hydrolase 25	Protein	2	0.126038	0.0782581	0.107278	-	-	-	-	-	-	-	-	1.61055	0.620411
ieu-a-968	Ulcerative colitis	autoimmune	69	0.0164767	0.0449325	0.713844	0.146337	0.102632	0.158558	-	-	-	-0.0198266	0.163951	0.366699	0.621331
prot-a-957	Ephrin type-A receptor 2	Protein	1	-	-	-	-	-	-	0.474273	0.298363	0.111929	-	-	1.58958	0.622262
prot-a-1917	Matrix metalloproteinase-17	Protein	2	0.462057	0.291109	0.112461	-	-	-	-	-	-	-	-	1.58723	0.623187
prot-a-572	C-type lectin domain family 2 member A	Protein	1	-	-	-	-	-	-	0.500611	0.316513	0.11373	-	-	1.58165	0.624109
ukb-d-2956	General pain for 3+ months	others	1	-	-	-	-	-	-	1.81485	1.17108	0.12121	-	-	1.54971	0.62503
ukb-d-C79	Diagnoses - main ICD10: C79 Secondary malignant neoplasm of other sites	cancer	1	-	-	-	-	-	-	81.1718	60.5286	0.179905	-	-	1.34105	0.625948
prot-a-318	Complement component C6	Protein	1	-	-	-	-	-	-	0.51484	0.329232	0.117874	-	-	1.56376	0.626862
ieu-a-85	Extreme body mass index	Obesity	7	0.0984023	0.0865597	0.255616	-0.263175	0.406752	0.546148	-	-	-	0.089202	0.404662	1.13682	0.627769
prot-a-1673	Killer cell lectin-like receptor subfamily F member 1	Protein	2	0.319899	0.204785	0.11826	-	-	-	-	-	-	-	-	1.56212	0.628669
ieu-a-11	Crohn's disease	autoimmune	13	0.0104751	0.0345693	0.761876	0.065611	0.0731688	0.389079	-	-	-	-0.0298702	0.410795	0.303018	0.629563
prot-a-1882	Hepatocyte growth factor receptor	Protein	1	-	-	-	-	-	-	0.242568	0.155469	0.118705	-	-	1.56023	0.63045
prot-a-943	Endoglin	Protein	1	-	-	-	-	-	-	0.387945	0.248645	0.118705	-	-	1.56023	0.63133
prot-a-1444	Insulin-like growth factor 1 receptor	Protein	1	-	-	-	-	-	-	0.423018	0.271125	0.118705	-	-	1.56023	0.632203
prot-a-1737	Leukemia inhibitory factor receptor	Protein	1	-	-	-	-	-	-	0.307662	0.19719	0.118705	-	-	1.56023	0.633068
prot-a-1400	Intercellular adhesion molecule 4	Protein	1	-	-	-	-	-	-	0.437889	0.280656	0.118705	-	-	1.56023	0.633927
prot-a-422	OX-2 membrane glycoprotein	Protein	1	-	-	-	-	-	-	0.486929	0.312087	0.118705	-	-	1.56023	0.634779
prot-b-77	selectin E	Protein	1	-	-	-	-	-	-	0.106846	0.0684805	0.118705	-	-	1.56023	0.635625
prot-a-420	CD177 antigen	Protein	3	0.207324	0.132923	0.118824	0.53589	0.474674	0.461483	-	-	-	-0.112528	0.601275	1.55973	0.636464
prot-a-408	C-C motif chemokine 3-like 1	Protein	2	0.299338	0.193683	0.122224	-	-	-	-	-	-	-	-	1.54551	0.637307
prot-a-2507	Retinol-binding protein 4	Protein	1	-	-	-	-	-	-	0.421129	0.27282	0.122682	-	-	1.54361	0.638145
ukb-d-ASTHMA_HOSPITAL1	Asthma, hospital admissions 1	resp	2	39.2104	30.9876	0.205743	-	-	-	-	-	-	-	-	1.26536	0.638982
prot-b-26	heat shock protein family B (small) member 1	Protein	1	-	-	-	-	-	-	0.224199	0.145845	0.124236	-	-	1.53723	0.639812
prot-a-522	Complement factor H-related protein 5	Protein	1	-	-	-	-	-	-	0.203958	0.133181	0.125661	-	-	1.53144	0.64064
ieu-a-1231	Mucinous ovarian cancer: invasive and low malignant potential	cancer	3	0.1334	0.103096	0.195687	0.229554	0.543115	0.745423	-	-	-	-0.0289827	0.886426	1.29394	0.641468
prot-a-1693	Lymphocyte activation gene 3 protein	Protein	1	-	-	-	-	-	-	0.485419	0.322694	0.132511	-	-	1.50427	0.642302
prot-a-1784	Leucine-rich repeat-containing protein 15	Protein	2	0.158285	0.105376	0.133071	-	-	-	-	-	-	-	-	1.5021	0.643132
ukb-b-16048	Non-cancer illness code, self-reported: pulmonary embolism +/- dvt	resp	4	17.895	14.7253	0.224267	-111.111	122.901	0.461379	-	-	-	0.240324	0.40122	1.21526	0.643964
prot-a-1170	Polypeptide N-acetylgalactosaminyltransferase 1	Protein	3	0.228975	0.15378	0.136494	-0.146974	0.702942	0.868783	-	-	-	0.0835882	0.68081	1.48897	0.64479
prot-b-67	matrix metallopeptidase 12	Protein	1	-	-	-	-	-	-	0.130761	0.0879687	0.13716	-	-	1.48645	0.645612
prot-a-3022	Transmembrane protease serine 11A	Protein	1	-	-	-	-	-	-	0.595124	0.400422	0.137215	-	-	1.48624	0.646428
ieu-a-1283	Alcohol consumption	Behavioural	3	2.11159	1.29236	0.102278	-7.78203	7.05664	0.468904	-	-	-	0.257334	0.390815	1.63391	0.64724
prot-a-1759	Leiomodin-1	Protein	1	-	-	-	-	-	-	0.406071	0.275937	0.141127	-	-	1.47161	0.648053
ieu-a-832	Rheumatoid arthritis	autoimmune	39	0.00802138	0.045559	0.860242	0.036276	0.0706796	0.610831	-	-	-	-0.00714287	0.604177	0.176066	0.648865
prot-a-2520	Tumor necrosis factor receptor superfamily member 19L	Protein	1	-	-	-	-	-	-	0.182369	0.1249	0.144255	-	-	1.46013	0.649673
ukb-d-K61	Diagnoses - main ICD10: K61 Abscess of anal and rectal regions	GI	1	-	-	-	-	-	-	88.1775	65.6288	0.179085	-	-	1.34358	0.650476
ukb-d-PULM_MEDICATIO_COMORB	Medication related adverse effects (Asthma/COPD)	resp	6	5.45572	4.61838	0.237481	-2.76253	14.8873	0.861817	-	-	-	0.0380011	0.589702	1.18131	0.651275
prot-a-1043	Protein FAM19A5	Protein	1	-	-	-	-	-	-	0.497086	0.341434	0.145427	-	-	1.45588	0.652068
ieu-a-87	Extreme waist-to-hip ratio	Obesity	2	0.176048	0.172249	0.306756	-	-	-	-	-	-	-	-	1.02205	0.652857
ukb-b-19657	Forced expiratory volume in 1-second (FEV1)	resp	218	0.287571	0.244476	0.239486	0.605854	0.748589	0.419217	-	-	-	-0.00513843	0.653203	1.17627	0.653641
prot-a-1756	VIP36-like protein	Protein	1	-	-	-	-	-	-	0.269848	0.186092	0.147037	-	-	1.45008	0.654421
prot-b-79	platelet and endothelial cell adhesion molecule 1	Protein	2	0.194703	0.134442	0.147554	-	-	-	-	-	-	-	-	1.44822	0.655196
prot-a-2665	E-selectin	Protein	3	0.199069	0.137501	0.147681	0.423054	0.569436	0.593223	-	-	-	-0.0479399	0.754837	1.44777	0.655967
prot-a-2697	Glia-derived nexin	Protein	1	-	-	-	-	-	-	0.179799	0.124761	0.149543	-	-	1.44115	0.656735
prot-a-1082	Fc receptor-like protein 4	Protein	1	-	-	-	-	-	-	0.086429	0.0600532	0.150092	-	-	1.43921	0.6575
ieu-a-91	Obesity class 2	Obesity	11	0.0921609	0.0919143	0.316014	0.196609	0.280216	0.500646	-	-	-	-0.0191236	0.702345	1.00268	0.65826
ieu-a-1232	Low malignant potential mucinous ovarian cancer	cancer	4	0.0885439	0.0734694	0.228133	0.147065	0.27368	0.644804	-	-	-	-0.0206664	0.844935	1.20518	0.659015
prot-a-2519	Tumor necrosis factor receptor superfamily member 19L	Protein	1	-	-	-	-	-	-	0.301047	0.209832	0.151372	-	-	1.4347	0.659766
prot-a-1123	Leucine-rich repeat transmembrane protein FLRT2	Protein	1	-	-	-	-	-	-	0.328894	0.229466	0.151772	-	-	1.4333	0.660512
prot-a-3038	Tumor necrosis factor receptor superfamily member 11B	Protein	2	0.430276	0.300906	0.152735	-	-	-	-	-	-	-	-	1.42994	0.661255
ieu-a-970	Ulcerative colitis	autoimmune	81	0.00556786	0.0467278	0.905152	0.107766	0.109642	0.328664	-	-	-	-0.014118	0.305983	0.119155	0.661998
ieu-a-1096	Childhood obesity	Obesity	5	0.115617	0.117959	0.327013	0.0978076	0.859399	0.916578	-	-	-	0.0034633	0.984622	0.980147	0.662739
ukb-b-5911	Diagnoses - secondary ICD10: Z88.0 Personal history of allergy to penicillin	autoimmune	1	-	-	-	-	-	-	2.83749	26.6595	0.915237	-	-	0.106435	0.663476
prot-a-2721	Sialate O-acetylesterase	Protein	2	0.313643	0.222453	0.15856	-	-	-	-	-	-	-	-	1.40993	0.66421
ukb-d-M13_SPONDYLOPATHY	#Spondylopathies	autoimmune	1	-	-	-	-	-	-	3.29652	32.9778	0.920375	-	-	0.0999618	0.66494
prot-a-1402	Intercellular adhesion molecule 5	Protein	2	0.169244	0.120497	0.160154	-	-	-	-	-	-	-	-	1.40455	0.665667
prot-a-2172	Peptidyl-glycine alpha-amidating monooxygenase	Protein	5	0.120563	0.0864069	0.162926	0.195831	0.193112	0.38522	-	-	-	-0.0272786	0.692419	1.3953	0.666394
ieu-a-90	Obesity class 1	Obesity	14	0.117828	0.123167	0.338744	0.0087906	0.33058	0.979223	-	-	-	0.012791	0.728439	0.95665	0.667117
prot-a-2269	Phosphatidylinositol 4-phosphate 3-kinase C2 domain-containing subunit alpha	Protein	3	0.310197	0.223649	0.165447	0.968967	0.406779	0.253033	-	-	-	-0.146314	0.326649	1.38698	0.667839
met-c-841	Albumin	Protein	2	0.847506	0.612111	0.166187	-	-	-	-	-	-	-	-	1.38456	0.668557
ukb-b-223	Current tobacco smoking	Behavioural	30	1.71669	1.12273	0.126259	9.11208	4.54255	0.0546111	-	-	-	-0.0617834	0.104052	1.52902	0.669275
prot-a-545	Neural cell adhesion molecule L1-like protein	Protein	3	0.195824	0.142964	0.170768	0.134266	0.388181	0.788003	-	-	-	0.0171544	0.892447	1.36974	0.669992
ukb-b-7953	Forced vital capacity (FVC)	resp	269	0.244072	0.223868	0.275603	0.772936	0.603153	0.201133	-	-	-	-0.00879574	0.345862	1.09025	0.670703
ukb-b-19041	Type of cancer: ICD10: C50.9 Breast, unspecified	cancer	9	9.40096	8.3104	0.257959	6.95193	25.8606	0.795816	-	-	-	0.0059047	0.922514	1.13123	0.671413
prot-a-328	Carbonic anhydrase 1	Protein	1	-	-	-	-	-	-	0.399414	0.29447	0.174978	-	-	1.35638	0.672121
ukb-b-8133	Light smokers, at least 100 smokes in lifetime	resp	2	1.78667	1.66298	0.282652	-	-	-	-	-	-	-	-	1.07438	0.672827
met-c-842	Apolipoprotein A-I	Protein	9	0.212204	0.157389	0.177567	0.527392	0.437818	0.267503	-	-	-	-0.045144	0.465663	1.34828	0.67353
prot-a-540	Chitinase-3-like protein 1	Protein	2	0.0786524	0.058405	0.178086	-	-	-	-	-	-	-	-	1.34667	0.67423
prot-a-1516	Interleukin-27	Protein	1	-	-	-	-	-	-	0.388365	0.288554	0.178334	-	-	1.3459	0.674925
prot-a-453	Complement decay-accelerating factor	Protein	1	-	-	-	-	-	-	0.134569	0.0999921	0.178368	-	-	1.3458	0.675616
ukb-d-20422	More irritable than usual during worst period of anxiety	psy	1	-	-	-	-	-	-	3.17318	2.33714	0.174553	-	-	1.35772	0.676303
prot-a-1783	Leucine-rich PPR motif-containing protein, mitochondrial	Protein	2	0.095125	0.070774	0.178927	-	-	-	-	-	-	-	-	1.34407	0.676986
prot-a-319	Uncharacterized protein C6orf226	Protein	2	0.180674	0.134731	0.179921	-	-	-	-	-	-	-	-	1.341	0.677666
prot-a-1031	Protein FAM171B	Protein	1	-	-	-	-	-	-	0.226236	0.168719	0.179951	-	-	1.34091	0.678341
prot-a-1519	Interleukin-2 receptor subunit beta	Protein	1	-	-	-	-	-	-	0.419579	0.313051	0.180151	-	-	1.34029	0.679013
prot-a-729	Cathepsin Z	Protein	1	-	-	-	-	-	-	0.199396	0.149017	0.180873	-	-	1.33807	0.679681
ukb-b-8072	Diagnoses - secondary ICD10: N40 Hyperplasia of prostate	cancer	3	30.29	27.471	0.270193	-378.528	252.866	0.374932	-	-	-	0.540325	0.351452	1.10262	0.680345
prot-a-2450	6-pyruvoyl tetrahydrobiopterin synthase	Protein	1	-	-	-	-	-	-	0.445198	0.334558	0.183287	-	-	1.3307	0.681008
prot-a-2517	RELT-like protein 1	Protein	1	-	-	-	-	-	-	0.418337	0.314975	0.184125	-	-	1.32816	0.681668
ieu-a-1136	ER- Breast cancer (iCOGS)	cancer	4	0.229232	0.209985	0.274983	0.373867	0.862158	0.706842	-	-	-	-0.0254255	0.876757	1.09166	0.682325
prot-a-412	Cerebral cavernous malformations 2 protein	Protein	4	0.243896	0.184995	0.187372	1.10407	0.487073	0.151581	-	-	-	-0.170481	0.202982	1.31839	0.682981
prot-a-944	Gamma-enolase	Protein	1	-	-	-	-	-	-	0.476192	0.362291	0.188714	-	-	1.31439	0.683635
prot-a-2105	Neurexin-3-beta	Protein	2	0.254087	0.193559	0.189281	-	-	-	-	-	-	-	-	1.31271	0.684286
prot-a-739	C-X-C motif chemokine 11	Protein	2	0.243269	0.185501	0.189717	-	-	-	-	-	-	-	-	1.31142	0.684933
prot-a-2748	Solute carrier family 22 member 16	Protein	3	0.208134	0.160082	0.193541	0.676361	1.40044	0.713569	-	-	-	-0.0834671	0.792759	1.30017	0.685581
prot-a-1401	Intercellular adhesion molecule 5	Protein	2	0.21597	0.166244	0.193905	-	-	-	-	-	-	-	-	1.29911	0.686226
ieu-a-294	Inflammatory bowel disease	autoimmune	120	-0.00243859	0.0447962	0.956587	0.160522	0.101887	0.117819	-	-	-	-0.0195809	0.0781447	-0.0544374	0.686867
prot-a-1835	Epididymis-specific alpha-mannosidase	Protein	3	0.144994	0.111965	0.195322	0.729785	0.544867	0.408283	-	-	-	-0.18986	0.470667	1.295	0.687505
prot-a-250	Myc box-dependent-interacting protein 1	Protein	1	-	-	-	-	-	-	0.381956	0.295961	0.196856	-	-	1.29056	0.688141
prot-a-1583	Integrin alpha-L	Protein	1	-	-	-	-	-	-	0.556623	0.433336	0.198965	-	-	1.28451	0.688776
prot-a-2700	Alpha-2-antiplasmin	Protein	1	-	-	-	-	-	-	0.341824	0.266666	0.199898	-	-	1.28184	0.689409
ukb-b-11484	Diagnoses - secondary ICD10: Z51.1 Chemotherapy session for neoplasm	cancer	1	-	-	-	-	-	-	33.9478	32.4952	0.296161	-	-	1.0447	0.690037
prot-a-1903	Multiple inositol polyphosphate phosphatase 1	Protein	1	-	-	-	-	-	-	0.414608	0.323825	0.200424	-	-	1.28034	0.690662
ukb-b-13405	Forced expiratory volume in 1-second (FEV1), predicted percentage	resp	72	0.221659	0.223847	0.322065	-0.631364	0.972145	0.51817	-	-	-	0.0238159	0.370312	0.990222	0.691286
prot-a-1911	Stromelysin-2	Protein	3	0.309777	0.243549	0.203399	0.64625	0.490502	0.413315	-	-	-	-0.128488	0.563773	1.27193	0.691907
prot-a-124	Adipocyte plasma membrane-associated protein	Protein	2	0.237416	0.186715	0.203537	-	-	-	-	-	-	-	-	1.27154	0.692525
prot-a-549	Chordin-like protein 2	Protein	2	0.172023	0.135318	0.203641	-	-	-	-	-	-	-	-	1.27125	0.693139
prot-a-74	CD166 antigen	Protein	2	0.251394	0.197877	0.203921	-	-	-	-	-	-	-	-	1.27046	0.693749
ukb-b-20142	Diagnoses - secondary ICD10: Z85.3 Personal history of malignant neoplasm of breast	cancer	9	11.4918	11.1517	0.302777	17.8141	37.9401	0.652963	-	-	-	-0.0124668	0.865663	1.0305	0.694357
ukb-d-K11_LIVER	Diseases of liver	GI	1	-	-	-	-	-	-	39.3645	34.3573	0.251904	-	-	1.14574	0.694963
prot-a-2156	Oncostatin-M-specific receptor subunit beta	Protein	1	-	-	-	-	-	-	0.31804	0.251627	0.206254	-	-	1.26393	0.695565
ukb-b-16855	Cancer diagnosed by doctor	cancer	12	4.0908	3.98734	0.304918	5.66946	14.4313	0.702668	-	-	-	-0.00747921	0.911271	1.02594	0.696164
prot-a-2324	DNA-directed RNA polymerases I and III subunit RPAC1	Protein	3	0.280524	0.22285	0.208102	0.735079	0.532355	0.399029	-	-	-	-0.115361	0.517725	1.2588	0.696761
prot-a-2755	Adenosine 3'-phospho 5'-phosphosulfate transporter 2	Protein	1	-	-	-	-	-	-	0.417525	0.33269	0.20948	-	-	1.255	0.697356
ukb-d-K11_OTHDIG	Other diseases of the digestive system	GI	1	-	-	-	-	-	-	13.8722	12.2792	0.258588	-	-	1.12974	0.69795
prot-a-170	Arrestin domain-containing protein 3	Protein	1	-	-	-	-	-	-	0.371025	0.298223	0.213457	-	-	1.24412	0.698542
prot-a-1386	Endoplasmin	Protein	3	0.186436	0.150214	0.214556	-0.0143103	0.35021	0.974001	-	-	-	0.138858	0.640031	1.24114	0.699132
prot-a-1169	Polypeptide N-acetylgalactosaminyltransferase 16	Protein	1	-	-	-	-	-	-	0.40606	0.327313	0.214758	-	-	1.24059	0.699719
prot-a-2017	Natural cytotoxicity triggering receptor 3 ligand 1	Protein	1	-	-	-	-	-	-	0.451972	0.365283	0.215968	-	-	1.23732	0.700304
prot-a-521	Complement factor H-related protein 5	Protein	2	0.122248	0.0989113	0.216481	-	-	-	-	-	-	-	-	1.23594	0.700886
prot-a-2042	beta-nerve growth factor	Protein	1	-	-	-	-	-	-	0.391639	0.317926	0.218002	-	-	1.23186	0.701466
prot-a-2694	Serpin A9	Protein	2	0.240166	0.195118	0.218369	-	-	-	-	-	-	-	-	1.23088	0.702043
ieu-a-831	Rheumatoid arthritis	autoimmune	13	-0.00816956	0.0526367	0.876658	-0.163733	0.106019	0.150765	-	-	-	0.0586731	0.125238	-0.155207	0.702618
prot-a-1152	Galactoside 3(4)-L-fucosyltransferase	Protein	1	-	-	-	-	-	-	0.0749635	0.0610465	0.219457	-	-	1.22797	0.703189
prot-a-2401	Pregnancy-specific beta-1-glycoprotein 2	Protein	1	-	-	-	-	-	-	0.463986	0.378986	0.220845	-	-	1.22428	0.703759
ukb-d-IBD_ENDOMETRIOSIS	Endometriosis, IBD co-morbidity	GI	1	-	-	-	-	-	-	59.9484	54.3576	0.270091	-	-	1.10285	0.704325
prot-a-847	Mitochondrial import inner membrane translocase subunit TIM14	Protein	2	0.247943	0.202871	0.221643	-	-	-	-	-	-	-	-	1.22217	0.704889
ieu-a-1075	Selenium	Haematology	1	-	-	-	-	-	-	0.286378	0.181574	0.11475	-	-	1.5772	0.705451
prot-a-2907	Sushi, von Willebrand factor type A, EGF and pentraxin domain-containing protein 1	Protein	2	0.239091	0.196101	0.22276	-	-	-	-	-	-	-	-	1.21922	0.70601
met-c-862	Glycoproteins	Protein	9	0.129916	0.106655	0.223188	-0.0225861	0.159839	0.891609	-	-	-	0.0472698	0.251927	1.21809	0.706565
prot-b-68	spondin 1	Protein	1	-	-	-	-	-	-	0.222065	0.182718	0.224235	-	-	1.21534	0.707119
prot-a-2532	Repulsive guidance molecule A	Protein	2	0.288901	0.237826	0.224459	-	-	-	-	-	-	-	-	1.21476	0.70767
prot-a-1677	Importin subunit alpha-1	Protein	1	-	-	-	-	-	-	0.382636	0.317832	0.22863	-	-	1.2039	0.708222
prot-a-44	Adhesion G protein-coupled receptor F5	Protein	4	0.065904	0.0549015	0.229982	0.000769084	0.0728888	0.992539	-	-	-	0.0589514	0.307222	1.2004	0.708771
prot-a-1949	Beta-microseminoprotein	Protein	2	0.0696107	0.0582016	0.231686	-	-	-	-	-	-	-	-	1.19603	0.709319
ukb-d-J10_ASTHMA	Asthma	resp	2	27.0381	29.8912	0.365703	-	-	-	-	-	-	-	-	0.904551	0.709866
ukb-d-ASTHMA_CHILD	Childhood asthma (age<16)	resp	2	27.0381	29.8912	0.365703	-	-	-	-	-	-	-	-	0.904551	0.710409
prot-a-2110	Neuron-specific protein family member 1	Protein	1	-	-	-	-	-	-	0.333821	0.280376	0.233804	-	-	1.19062	0.71095
prot-a-2650	Adseverin	Protein	1	-	-	-	-	-	-	0.264719	0.222642	0.234445	-	-	1.18899	0.711489
prot-a-771	Dynactin subunit 2	Protein	1	-	-	-	-	-	-	0.348262	0.292906	0.234445	-	-	1.18899	0.712024
prot-a-2965	Transforming growth factor beta-3	Protein	2	0.219438	0.185352	0.236453	-	-	-	-	-	-	-	-	1.1839	0.712559
prot-a-1406	ICOS ligand	Protein	1	-	-	-	-	-	-	0.382105	0.323785	0.237953	-	-	1.18012	0.713091
prot-a-659	Corticotropin-releasing factor-binding protein	Protein	2	0.150294	0.127433	0.238238	-	-	-	-	-	-	-	-	1.1794	0.713621
prot-a-2796	Sorting nexin-8	Protein	1	-	-	-	-	-	-	0.390542	0.331445	0.238676	-	-	1.1783	0.714149
prot-a-409	C-C motif chemokine 5	Protein	2	0.236546	0.20108	0.239445	-	-	-	-	-	-	-	-	1.17638	0.714674
prot-a-2064	Noggin	Protein	2	0.280716	0.238875	0.239932	-	-	-	-	-	-	-	-	1.17516	0.715197
prot-a-2281	Polycystin-2	Protein	1	-	-	-	-	-	-	0.389311	0.332691	0.241926	-	-	1.17019	0.715718
prot-a-3280	Zinc/RING finger protein 4	Protein	1	-	-	-	-	-	-	0.365124	0.312022	0.241926	-	-	1.17019	0.716237
ukb-b-10591	Chest pain or discomfort	resp	6	3.79644	4.33708	0.381387	37.3433	33.7014	0.329973	-	-	-	-0.179795	0.372289	0.875343	0.716755
prot-a-2538	Regulator of G-protein signaling 8	Protein	3	0.257212	0.221409	0.245356	0.822274	0.324016	0.238965	-	-	-	-0.134986	0.296982	1.1617	0.717271
prot-a-2966	Transforming growth factor-beta-induced protein ig-h3	Protein	2	0.117583	0.101399	0.24621	-	-	-	-	-	-	-	-	1.1596	0.717785
ieu-a-293	Inflammatory bowel disease	autoimmune	10	-0.0108403	0.0417373	0.795074	-0.0493214	0.0909216	0.602281	-	-	-	0.0180251	0.645048	-0.259727	0.718296
prot-a-1839	MANSC domain-containing protein 4	Protein	1	-	-	-	-	-	-	0.100171	0.0884133	0.25722	-	-	1.13299	0.718813
ukb-b-16890	Cancer code, self-reported: breast cancer	cancer	16	4.45484	5.01626	0.374497	15.0382	13.6048	0.287638	-	-	-	-0.0357821	0.415993	0.888081	0.719327
prot-a-2789	Alpha-synuclein	Protein	1	-	-	-	-	-	-	0.265714	0.235647	0.259492	-	-	1.12759	0.71984
prot-a-2790	Alpha-synuclein	Protein	1	-	-	-	-	-	-	0.289251	0.256521	0.259492	-	-	1.12759	0.72035
prot-a-2078	N-terminal pro-BNP	Protein	2	0.156538	0.139512	0.261845	-	-	-	-	-	-	-	-	1.12204	0.720859
prot-a-232	Brevican core protein	Protein	1	-	-	-	-	-	-	0.261342	0.233511	0.263063	-	-	1.11918	0.721366
prot-a-1867	Multiple coagulation factor deficiency protein 2	Protein	3	0.0774121	0.0691806	0.263146	0.0400459	0.116925	0.789935	-	-	-	0.0315591	0.723974	1.11899	0.721871
prot-a-2642	Scavenger receptor class F member 2	Protein	1	-	-	-	-	-	-	0.226557	0.202684	0.26366	-	-	1.11778	0.722373
prot-a-656	Protein CREG1	Protein	2	0.138384	0.123898	0.264028	-	-	-	-	-	-	-	-	1.11692	0.722873
prot-a-1497	Interleukin-1 receptor type 2	Protein	2	0.122627	0.110029	0.265064	-	-	-	-	-	-	-	-	1.1145	0.723371
prot-a-439	Myeloid cell surface antigen CD33	Protein	3	0.0594794	0.053448	0.265774	0.125594	0.143171	0.541574	-	-	-	-0.0478238	0.705966	1.11285	0.723867
prot-a-844	DnaJ homolog subfamily C member 15	Protein	2	0.28757	0.258608	0.266141	-	-	-	-	-	-	-	-	1.11199	0.724361
prot-a-1842	Dual specificity mitogen-activated protein kinase kinase 4	Protein	1	-	-	-	-	-	-	0.0736911	0.0662913	0.266299	-	-	1.11163	0.724852
ieu-a-1112	Primary sclerosing cholangitis	GI	14	0.0491902	0.0497902	0.323177	0.0776884	0.093383	0.421694	-	-	-	-0.0121164	0.720771	0.98795	0.725341
prot-a-1597	Protein jagged-2	Protein	1	-	-	-	-	-	-	0.324763	0.292561	0.266969	-	-	1.11007	0.725828
prot-a-1933	3-mercaptopyruvate sulfurtransferase	Protein	1	-	-	-	-	-	-	0.327189	0.29504	0.267445	-	-	1.10897	0.726312
prot-a-1088	Fibroblast growth factor 1	Protein	2	0.232431	0.209636	0.267544	-	-	-	-	-	-	-	-	1.10874	0.726795
prot-a-1663	Kallikrein-5	Protein	1	-	-	-	-	-	-	0.385667	0.349544	0.269879	-	-	1.10334	0.727276
ukb-d-30280_irnt	Immature reticulocyte fraction	Haematology	159	0.198546	0.135478	0.14278	0.403308	0.235	0.0880973	-	-	-	-0.00823677	0.287892	1.46552	0.727755
prot-a-2332	Periostin	Protein	1	-	-	-	-	-	-	0.30346	0.275545	0.270761	-	-	1.10131	0.728232
prot-a-2805	Protein SPACA7	Protein	1	-	-	-	-	-	-	0.286333	0.260383	0.27148	-	-	1.09966	0.728707
prot-a-2523	Proto-oncogene tyrosine-protein kinase receptor Ret	Protein	1	-	-	-	-	-	-	0.230947	0.210123	0.271724	-	-	1.0991	0.729179
prot-a-3039	Tumor necrosis factor receptor superfamily member 11B	Protein	2	0.219032	0.199747	0.272841	-	-	-	-	-	-	-	-	1.09654	0.72965
prot-a-1770	Leucine-rich repeats and immunoglobulin-like domains protein 3	Protein	1	-	-	-	-	-	-	0.289215	0.264857	0.274849	-	-	1.09196	0.73012
prot-a-191	Aspartyl/asparaginyl beta-hydroxylase	Protein	1	-	-	-	-	-	-	0.218488	0.201647	0.278579	-	-	1.08352	0.73059
prot-a-110	Annexin A9	Protein	2	0.28529	0.263831	0.279547	-	-	-	-	-	-	-	-	1.08134	0.731058
prot-b-47	interleukin 16	Protein	1	-	-	-	-	-	-	0.107734	0.0996364	0.279575	-	-	1.08128	0.731524
ukb-d-C_MALE_GENITAL	Cancer of male genital	cancer	20	3.3362	3.99598	0.40378	4.94908	11.027	0.65892	-	-	-	-0.00527676	0.876542	0.83489	0.731988
ukb-d-C3_MALE_GENITAL	malignant neoplasm of male genital organs	cancer	20	3.3362	3.99598	0.40378	4.94908	11.027	0.65892	-	-	-	-0.00527676	0.876542	0.83489	0.732449
prot-a-2588	Dolichyl-diphosphooligosaccharide--protein glycosyltransferase subunit 1	Protein	1	-	-	-	-	-	-	0.140927	0.130593	0.28053	-	-	1.07913	0.732908
ukb-b-15685	Type of cancer: ICD10: C44.5 Skin of trunk	cancer	12	9.15958	11.1163	0.409951	1.67566	54.0427	0.975875	-	-	-	0.0106221	0.890279	0.823981	0.733368
prot-a-2139	Odorant-binding protein 2b	Protein	3	0.0734203	0.068736	0.285453	-0.0763854	0.224352	0.791086	-	-	-	0.0842014	0.605434	1.06815	0.733826
prot-a-1048	Protein FAM24B	Protein	1	-	-	-	-	-	-	0.343816	0.324138	0.288823	-	-	1.06071	0.734283
prot-a-353	Calnexin	Protein	1	-	-	-	-	-	-	0.240858	0.22725	0.289199	-	-	1.05988	0.734738
ukb-d-20406	Ever addicted to alcohol	Behavioural	3	0.538221	0.441244	0.222547	-0.256395	1.30708	0.876688	-	-	-	0.109179	0.634932	1.21978	0.735192
ieu-a-12	Crohn's disease	autoimmune	107	-0.0164811	0.0389723	0.672374	-0.056451	0.102659	0.583563	-	-	-	0.00562125	0.674723	-0.422893	0.735644
prot-a-2848	CMP-N-acetylneuraminate-beta-galactosamide-alpha-2,3-sialyltransferase 1	Protein	2	0.196843	0.187743	0.294423	-	-	-	-	-	-	-	-	1.04847	0.736096
prot-a-1570	Interferon regulatory factor 6	Protein	1	-	-	-	-	-	-	0.321714	0.307472	0.295414	-	-	1.04632	0.736546
ukb-b-13392	Diagnoses - secondary ICD10: K57.3 Diverticular disease of large intestine without perforation or abscess	GI	3	15.474	16.8137	0.357403	-67.6535	112.877	0.656261	-	-	-	0.16267	0.592479	0.920324	0.736994
prot-a-288	Uncharacterized protein C17orf78	Protein	1	-	-	-	-	-	-	0.213976	0.205633	0.298072	-	-	1.04058	0.737441
prot-a-3099	Trem-like transcript 1 protein	Protein	1	-	-	-	-	-	-	0.336188	0.323229	0.298296	-	-	1.04009	0.737886
prot-a-1156	Fragile X mental retardation syndrome-related protein 1	Protein	1	-	-	-	-	-	-	0.346102	0.333295	0.299072	-	-	1.03843	0.738329
ukb-b-13251	Non-cancer illness code, self-reported: gout	autoimmune	19	-1.90222	4.03219	0.6371	-1.15311	6.68564	0.8651	-	-	-	-0.00279592	0.888096	-0.471758	0.738773
prot-a-2440	Tyrosine-protein phosphatase non-receptor type 4	Protein	1	-	-	-	-	-	-	0.260471	0.254216	0.305551	-	-	1.0246	0.739215
prot-a-2148	Opalin	Protein	2	0.229975	0.224852	0.306408	-	-	-	-	-	-	-	-	1.02279	0.739656
ukb-d-COLITNONINFNAS	Noninfectious colitis NAS	autoimmune	1	-	-	-	-	-	-	-11.6589	23.4844	0.619574	-	-	-0.496454	0.740097
prot-a-1834	Endoplasmic reticulum mannosyl-oligosaccharide 1,2-alpha-mannosidase	Protein	1	-	-	-	-	-	-	0.362067	0.358472	0.312481	-	-	1.01003	0.740536
ukb-b-11231	Diagnoses - secondary ICD10: Z85.8 Personal history of malignant neoplasms of other organs and systems	cancer	1	-	-	-	-	-	-	34.9522	46.0159	0.447513	-	-	0.759568	0.740974
prot-a-256	Bone morphogenetic protein 6	Protein	1	-	-	-	-	-	-	0.235348	0.233361	0.313207	-	-	1.00852	0.74141
prot-a-1276	Glutamate receptor ionotropic, delta-2	Protein	4	0.143742	0.143006	0.314827	0.220701	0.422618	0.653595	-	-	-	-0.0206534	0.860185	1.00515	0.741844
ieu-a-1124	Clear cell ovarian cancer	cancer	1	-	-	-	-	-	-	0.155066	0.205799	0.45116	-	-	0.753482	0.742277
prot-a-1102	Fibroblast growth factor receptor 2	Protein	1	-	-	-	-	-	-	0.341363	0.340489	0.31607	-	-	1.00257	0.742707
prot-a-2233	Protein disulfide-isomerase A5	Protein	1	-	-	-	-	-	-	0.087596	0.08754	0.317001	-	-	1.00064	0.743137
prot-a-1150	Furin	Protein	2	0.200556	0.200812	0.317928	-	-	-	-	-	-	-	-	0.998725	0.743564
ieu-a-815	Systemic lupus erythematosus	autoimmune	2	-0.0568614	0.109266	0.602788	-	-	-	-	-	-	-	-	-0.520395	0.74399
prot-a-1099	Fibroblast growth factor 8 isoform B	Protein	2	0.23268	0.233276	0.318548	-	-	-	-	-	-	-	-	0.997446	0.744414
prot-a-868	Down syndrome cell adhesion molecule	Protein	1	-	-	-	-	-	-	0.241693	0.244169	0.322242	-	-	0.989862	0.744838
prot-a-3000	Transmembrane protein 132C	Protein	2	0.194506	0.196619	0.32254	-	-	-	-	-	-	-	-	0.989253	0.74526
prot-a-553	Carbohydrate sulfotransferase 15	Protein	1	-	-	-	-	-	-	0.328172	0.332525	0.323687	-	-	0.98691	0.74568
prot-a-552	Carbohydrate sulfotransferase 15	Protein	1	-	-	-	-	-	-	0.344176	0.348741	0.323687	-	-	0.98691	0.746099
prot-a-554	Carbohydrate sulfotransferase 1	Protein	1	-	-	-	-	-	-	0.271736	0.275341	0.323687	-	-	0.98691	0.746516
prot-b-70	C-X3-C motif chemokine ligand 1	Protein	1	-	-	-	-	-	-	0.264744	0.268485	0.324101	-	-	0.986066	0.74693
prot-a-2402	Pregnancy-specific beta-1-glycoprotein 3	Protein	1	-	-	-	-	-	-	0.0689907	0.0700489	0.324676	-	-	0.984894	0.747344
prot-a-1707	Epididymal-specific lipocalin-10	Protein	3	0.198844	0.202313	0.325681	0.411547	0.561383	0.597278	-	-	-	-0.0663263	0.74209	0.982851	0.747755
prot-a-594	Calsyntenin-3	Protein	1	-	-	-	-	-	-	0.288772	0.293937	0.325888	-	-	0.982431	0.748166
ukb-b-17462	Diagnoses - secondary ICD10: E78.5 Hyperlipidaemia, unspecified	CVD	1	-	-	-	-	-	-	58.4058	37.5349	0.119699	-	-	1.55604	0.748574
prot-a-2243	Platelet endothelial aggregation receptor 1	Protein	3	0.118395	0.120578	0.326152	-0.247778	0.503252	0.708739	-	-	-	0.107769	0.590561	0.981894	0.74898
prot-a-3045	Tumor necrosis factor receptor superfamily member 19	Protein	1	-	-	-	-	-	-	0.331579	0.33821	0.326891	-	-	0.980394	0.749385
prot-a-1289	Glutathione S-transferase P	Protein	1	-	-	-	-	-	-	0.278307	0.284112	0.3273	-	-	0.979566	0.749788
prot-a-1179	Vitamin D-binding protein	Protein	1	-	-	-	-	-	-	0.0866825	0.0887793	0.328875	-	-	0.976382	0.750191
prot-a-2363	Salivary acidic proline-rich phosphoprotein 1/2	Protein	1	-	-	-	-	-	-	0.127989	0.131085	0.328875	-	-	0.976382	0.750591
prot-a-199	Sodium/potassium-transporting ATPase subunit alpha-1	Protein	1	-	-	-	-	-	-	0.135968	0.139257	0.328875	-	-	0.976382	0.750989
prot-a-2723	Sialic acid-binding Ig-like lectin 10	Protein	1	-	-	-	-	-	-	0.0736242	0.0754051	0.328875	-	-	0.976382	0.751386
prot-a-193	Retroviral-like aspartic protease 1	Protein	1	-	-	-	-	-	-	0.0838014	0.0858285	0.328875	-	-	0.976382	0.751781
prot-a-465	SLAM family member 5	Protein	1	-	-	-	-	-	-	0.134834	0.138095	0.328875	-	-	0.976382	0.752175
prot-a-3196	Testis-specific basic protein Y 1	Protein	1	-	-	-	-	-	-	0.116131	0.11894	0.328875	-	-	0.976382	0.752566
prot-a-550	Carbohydrate sulfotransferase 11	Protein	1	-	-	-	-	-	-	0.26452	0.271196	0.32937	-	-	0.975383	0.752956
ieu-a-803	PGC cross-disorder traits	psy	4	0.492351	0.49783	0.322666	0.929008	3.91403	0.834481	-	-	-	-0.0379597	0.920398	0.988994	0.753344
ieu-a-22	Schizophrenia	psy	70	0.0797164	0.0807511	0.323551	-0.400604	0.314311	0.206808	-	-	-	0.0390137	0.118734	0.987186	0.753731
prot-a-1199	GTP-binding protein GEM	Protein	1	-	-	-	-	-	-	0.356708	0.366763	0.33076	-	-	0.972585	0.754117
prot-a-2070	RNA-binding protein Nova-1	Protein	1	-	-	-	-	-	-	0.332541	0.342824	0.332044	-	-	0.970005	0.754501
ukb-b-8196	Ever highly irritable/argumentative for 2 days	psy	2	3.7275	3.79907	0.326514	-	-	-	-	-	-	-	-	0.98116	0.754884
ukb-b-14765	Diagnoses - main ICD10: D64.9 Anaemia, unspecified	Haematology	1	-	-	-	-	-	-	48.0515	35.9748	0.181648	-	-	1.3357	0.755266
ieu-a-273	Mean cell volume	Haematology	37	0.0458433	0.0346016	0.185208	0.0436535	0.0813918	0.595118	-	-	-	0.000615087	0.976381	1.32489	0.755649
prot-a-2590	Regulation of nuclear pre-mRNA domain-containing protein 1A	Protein	1	-	-	-	-	-	-	0.218113	0.228954	0.340768	-	-	0.952649	0.75603
prot-a-2120	Netrin-G1	Protein	1	-	-	-	-	-	-	0.260534	0.273483	0.340768	-	-	0.952649	0.756409
prot-b-80	natriuretic peptide B	Protein	2	0.132158	0.139032	0.341827	-	-	-	-	-	-	-	-	0.950562	0.756788
prot-a-1453	Insulin growth factor-like family member 3	Protein	3	0.187208	0.197037	0.342052	0.901395	0.437922	0.287908	-	-	-	-0.183633	0.335075	0.950118	0.757164
prot-a-208	Zinc-alpha-2-glycoprotein	Protein	4	0.178244	0.187972	0.343003	0.746409	0.337459	0.157491	-	-	-	-0.121062	0.204686	0.948248	0.757539
prot-a-415	Cyclin-C	Protein	2	0.178411	0.188514	0.343941	-	-	-	-	-	-	-	-	0.946407	0.757914
prot-a-1656	Kallikrein-11	Protein	1	-	-	-	-	-	-	0.0723754	0.0765074	0.344152	-	-	0.945993	0.758286
prot-a-1922	Multimerin-2	Protein	2	0.0980898	0.103975	0.345477	-	-	-	-	-	-	-	-	0.943399	0.758657
prot-a-823	Dickkopf-related protein 4	Protein	2	0.187778	0.199082	0.345567	-	-	-	-	-	-	-	-	0.943223	0.759027
prot-a-130	Apolipoprotein D	Protein	1	-	-	-	-	-	-	0.294513	0.312647	0.346194	-	-	0.941998	0.759396
ukb-b-18366	Diagnoses - main ICD10: I26.9 Pulmonary embolism without mention of acute cor pulmonale	resp	3	14.2137	22.2646	0.523215	77.4285	107.777	0.603401	-	-	-	-0.0832859	0.65621	0.638398	0.759763
prot-a-2899	SUN domain-containing protein 5	Protein	2	0.200448	0.21301	0.346692	-	-	-	-	-	-	-	-	0.941026	0.760129
prot-a-971	Endoplasmic reticulum aminopeptidase 1	Protein	2	0.0543889	0.0578283	0.346949	-	-	-	-	-	-	-	-	0.940523	0.760493
prot-a-1491	Interleukin-18 receptor 1	Protein	1	-	-	-	-	-	-	0.0761915	0.0814721	0.349693	-	-	0.935185	0.760856
prot-a-821	Dickkopf-related protein 1	Protein	2	0.179801	0.194183	0.354479	-	-	-	-	-	-	-	-	0.925937	0.76122
prot-a-1735	Lutropin subunit beta	Protein	1	-	-	-	-	-	-	0.179794	0.1944	0.355034	-	-	0.924869	0.761582
prot-a-687	Chondroitin sulfate N-acetylgalactosaminyltransferase 2	Protein	1	-	-	-	-	-	-	0.253134	0.273879	0.355353	-	-	0.924256	0.761943
prot-a-1332	Hemojuvelin	Protein	4	0.142727	0.154506	0.35561	-0.313792	0.382488	0.498211	-	-	-	0.0952644	0.326326	0.923763	0.762303
prot-a-776	Discoidin domain-containing receptor 2	Protein	1	-	-	-	-	-	-	0.249051	0.269678	0.355739	-	-	0.923514	0.762661
prot-a-1785	Leucine-rich repeat-containing protein 19	Protein	1	-	-	-	-	-	-	0.0508241	0.0551093	0.356402	-	-	0.922242	0.763018
ukb-b-12115	Diagnoses - main ICD10: C50.4 Upper-outer quadrant of breast	cancer	1	-	-	-	-	-	-	40.7792	61.5919	0.507915	-	-	0.662087	0.763374
ukb-b-8210	Non-cancer illness code, self-reported: crohns disease	GI	3	23.1964	29.4769	0.431321	64.7033	222.028	0.819476	-	-	-	-0.0398492	0.881319	0.786933	0.76373
ukb-b-4303	Diagnoses - secondary ICD10: K80.2 Calculus of gallbladder without cholecystitis	GI	1	-	-	-	-	-	-	39.9779	50.8406	0.431669	-	-	0.786339	0.764083
ukb-b-8416	Type of cancer: ICD10: C44.9 Malignant neoplasm of skin, unspecified	cancer	7	9.68459	14.737	0.511077	64.6197	90.8405	0.508666	-	-	-	-0.0779768	0.566769	0.657161	0.764436
ieu-a-971	Ulcerative colitis	autoimmune	2	-0.0728923	0.108455	0.501523	-	-	-	-	-	-	-	-	-0.672096	0.764787
prot-a-2991	Toll-like receptor 4:Lymphocyte antigen 96 complex	Protein	4	0.0768617	0.0843345	0.362089	-0.0514311	0.151872	0.767124	-	-	-	0.0672745	0.416638	0.911391	0.765137
prot-a-1492	Interleukin-18 receptor 1	Protein	2	0.0538614	0.0594091	0.364608	-	-	-	-	-	-	-	-	0.906619	0.765487
prot-a-2997	Transmembrane protein 132A	Protein	2	0.0610395	0.0673892	0.365055	-	-	-	-	-	-	-	-	0.905775	0.765835
prot-a-1312	Hepatitis A virus cellular receptor 2	Protein	1	-	-	-	-	-	-	0.258784	0.286625	0.366597	-	-	0.902867	0.766182
prot-a-2824	Kunitz-type protease inhibitor 2	Protein	2	0.201233	0.223159	0.367192	-	-	-	-	-	-	-	-	0.901746	0.766528
prot-a-518	Complement factor B	Protein	1	-	-	-	-	-	-	0.161936	0.179747	0.367636	-	-	0.90091	0.766873
prot-a-2260	Membrane-associated progesterone receptor component 2	Protein	1	-	-	-	-	-	-	0.261647	0.291446	0.369316	-	-	0.897756	0.767216
prot-a-2827	Testican-2	Protein	1	-	-	-	-	-	-	0.188565	0.210283	0.369868	-	-	0.896721	0.767559
prot-a-3090	Tryptase beta-2	Protein	2	0.259231	0.289181	0.370021	-	-	-	-	-	-	-	-	0.896433	0.7679
prot-a-529	Luteinizing hormone	Protein	1	-	-	-	-	-	-	0.111323	0.124258	0.370303	-	-	0.895905	0.76824
prot-a-195	ATPase family AAA domain-containing protein 1	Protein	1	-	-	-	-	-	-	0.274027	0.305941	0.37042	-	-	0.895687	0.768579
prot-a-1920	Neutrophil collagenase	Protein	4	0.0452356	0.0505945	0.371278	0.0248072	0.0785754	0.782121	-	-	-	0.0180955	0.766374	0.894082	0.768916
prot-a-2924	Tumor-associated calcium signal transducer 2	Protein	1	-	-	-	-	-	-	0.196382	0.219832	0.371682	-	-	0.893327	0.769252
prot-a-908	Epidermal growth factor	Protein	1	-	-	-	-	-	-	0.169331	0.18966	0.371957	-	-	0.892813	0.769587
ukb-b-11064	Diagnoses - secondary ICD10: Z95.1 Presence of aortocoronary bypass graft	CVD	5	19.9964	13.5703	0.140605	52.4383	53.2356	0.397242	-	-	-	-0.0591683	0.573284	1.47354	0.769921
prot-a-1188	Beta-1,3-galactosyl-O-glycosyl-glycoprotein beta-1,6-N-acetylglucosaminyltransferase 4	Protein	2	0.301826	0.338733	0.372905	-	-	-	-	-	-	-	-	0.891044	0.770254
ukb-d-J38	Diagnoses - main ICD10: J38 Diseases of vocal cords and larynx, not elsewhere classified	ENT	1	-	-	-	-	-	-	-12.7328	51.2748	0.803883	-	-	-0.248326	0.770585
ukb-b-11582	Diagnoses - main ICD10: K62.5 Haemorrhage of anus and rectum	GI	1	-	-	-	-	-	-	25.9991	34.2288	0.447513	-	-	0.759568	0.770916
prot-a-2906	Sushi, von Willebrand factor type A, EGF and pentraxin domain-containing protein 1	Protein	1	-	-	-	-	-	-	0.246813	0.278356	0.375251	-	-	0.88668	0.771245
prot-a-1974	Matrix-remodeling-associated protein 7	Protein	1	-	-	-	-	-	-	0.171763	0.194315	0.376729	-	-	0.883939	0.771574
ukb-d-J45	Diagnoses - main ICD10: J45 Asthma	resp	1	-	-	-	-	-	-	24.6951	43.061	0.566312	-	-	0.573491	0.771901
ukb-b-15541	Diagnoses - secondary ICD10: E66.9 Obesity, unspecified	Obesity	2	12.3453	31.505	0.695167	-	-	-	-	-	-	-	-	0.391852	0.772228
ukb-b-20261	Ever smoked	Behavioural	68	0.928401	0.888528	0.29608	-0.838676	4.24753	0.844082	-	-	-	0.0125241	0.671815	1.04488	0.772553
ukb-b-3672	Diagnoses - secondary ICD10: K44.9 Diaphragmatic hernia without obstruction or gangrene	GI	3	11.6777	15.6623	0.455912	80.0439	39.7139	0.293204	-	-	-	-0.211104	0.322072	0.745595	0.772878
ukb-b-12915	Cancer code, self-reported: malignant melanoma	cancer	5	10.1051	16.4272	0.538461	-24.2144	35.2185	0.541124	-	-	-	0.0669604	0.353741	0.615143	0.773202
prot-a-2852	Alpha-N-acetylgalactosaminide alpha-2,6-sialyltransferase 1	Protein	4	0.13963	0.160039	0.382951	0.246465	0.449816	0.638727	-	-	-	-0.0310563	0.817265	0.872472	0.773525
prot-a-3148	Ubiquitin domain-containing protein 2	Protein	1	-	-	-	-	-	-	0.199323	0.229093	0.384271	-	-	0.870054	0.773846
prot-a-3267	Zinc finger protein 276	Protein	2	0.310387	0.356887	0.38446	-	-	-	-	-	-	-	-	0.869707	0.774167
ieu-a-72	Waist-to-hip ratio	Obesity	29	0.154348	0.408325	0.705428	1.79192	1.88201	0.349475	-	-	-	-0.0409271	0.380529	0.378004	0.774486
ukb-d-30890_raw	Vitamin D	Haematology	50	0.0128197	0.0103427	0.215164	0.0214271	0.0162865	0.194546	-	-	-	-0.00955557	0.495575	1.23949	0.774806
prot-a-2001	Arylamine N-acetyltransferase 1	Protein	1	-	-	-	-	-	-	0.271546	0.315387	0.389242	-	-	0.860994	0.775124
prot-a-965	Ephrin type-B receptor 6	Protein	1	-	-	-	-	-	-	0.153262	0.178116	0.389532	-	-	0.860466	0.775441
ukb-b-18700	Non-cancer illness code, self-reported: cholelithiasis/gall stones	GI	12	5.08544	6.96155	0.465082	12.3136	27.6725	0.665814	-	-	-	-0.0159895	0.792738	0.730504	0.775757
ukb-b-2160	Diagnoses - main ICD10: C61 Malignant neoplasm of prostate	cancer	11	6.78139	11.3108	0.548806	31.8948	48.0386	0.523371	-	-	-	-0.0396174	0.602891	0.599551	0.776072
ukb-b-1702	Diagnoses - secondary ICD10: C77.3 Axillary and upper limb lymph nodes	cancer	2	23.0603	38.5332	0.549538	-	-	-	-	-	-	-	-	0.598452	0.776385
prot-a-407	C-C motif chemokine 3	Protein	1	-	-	-	-	-	-	0.0770917	0.0902029	0.392746	-	-	0.854648	0.776698
prot-a-3048	Tumor necrosis factor receptor superfamily member 1B	Protein	3	0.141472	0.166251	0.394795	0.26007	0.339196	0.583574	-	-	-	-0.026086	0.757141	0.850954	0.777011
ukb-b-11141	Forced expiratory volume in 1-second (FEV1), Best measure	resp	191	0.127962	0.236913	0.589112	0.911089	0.759244	0.231643	-	-	-	-0.013587	0.279035	0.540124	0.777322
prot-a-1854	MAP kinase-activated protein kinase 5	Protein	2	0.0679142	0.0802243	0.397243	-	-	-	-	-	-	-	-	0.846555	0.777633
prot-a-1550	Inosine-5'-monophosphate dehydrogenase 2	Protein	2	0.194261	0.229793	0.397903	-	-	-	-	-	-	-	-	0.845372	0.777942
prot-a-2522	Replication initiator 1	Protein	1	-	-	-	-	-	-	0.105096	0.124978	0.400398	-	-	0.84091	0.778251
prot-a-3281	Zona pellucida sperm-binding protein 4	Protein	1	-	-	-	-	-	-	0.251762	0.299392	0.400398	-	-	0.84091	0.778559
prot-a-814	Pre-mRNA-splicing factor ATP-dependent RNA helicase PRP16	Protein	1	-	-	-	-	-	-	0.199584	0.237343	0.400398	-	-	0.84091	0.778866
prot-a-2835	Spectrin alpha chain, non-erythrocytic 1	Protein	1	-	-	-	-	-	-	0.192237	0.228606	0.400398	-	-	0.84091	0.779172
prot-a-1183	Glucokinase	Protein	1	-	-	-	-	-	-	0.214508	0.25509	0.400398	-	-	0.84091	0.779476
prot-a-1407	DNA-binding protein inhibitor ID-1	Protein	1	-	-	-	-	-	-	0.273573	0.32533	0.400398	-	-	0.84091	0.779779
prot-a-1600	Junctional adhesion molecule B	Protein	1	-	-	-	-	-	-	0.233975	0.27824	0.400398	-	-	0.84091	0.780081
prot-a-1689	Kynureninase	Protein	1	-	-	-	-	-	-	0.101041	0.12043	0.401467	-	-	0.839004	0.780383
prot-a-1938	C-type mannose receptor 2	Protein	3	0.147392	0.177108	0.405286	0.809088	1.60097	0.702102	-	-	-	-0.134439	0.748821	0.832218	0.780684
ukb-d-30030_irnt	Haematocrit percentage	Haematology	199	0.223225	0.184442	0.226175	0.0223273	0.371848	0.952181	-	-	-	0.00487836	0.534321	1.21027	0.780984
prot-a-2739	Ski-like protein	Protein	2	0.343041	0.414457	0.407848	-	-	-	-	-	-	-	-	0.827687	0.781284
[truncated: 1,901 more rows]

## Sheet: TableS5_allProtPathways
Table S5. All enriched pathways for top-ranked proteins (p<0.05) in MR analysis.
[truncated: 52 more rows]

## Sheet: TableS6_DB_drugs (formatted)
Table S6. List of all drugs which target at least one significant protein identified from MR analysis (that alters ACE2 expression).
[truncated: 197 more rows]

[truncated: 1 more sheets: Table S7 FDRreg Enrichment]
